# Supplementary material for: Innovative strategies for the quantitative modeling of blood–brain barrier (BBB) permeability: harnessing the power of machine learning-based q-RASAR approach
Source: Royal Society of Chemistry journal article supplement (doi:10.1039/d4me00056k), 2024-01-01
Supplement: d4me00056k1.zip [file d4me00056k1.zip]

## Sheet: Cover page
				Supplementary information
				Innovative Strategies for the Quantitative Modeling of Blood-Brain Barrier (BBB) Permeability: Harnessing the Power of Machine Learning-based q-RASAR Approach
				Vinay Kumar, Arkaprava Banerjee, Kunal Roy*
				Drug Theoretics and Cheminformatics Laboratory,
				Department of Pharmaceutical Technology, Jadavpur University,
				Kolkata 700032, India
				*Corresponding author: K Roy, Email: kunal.roy@jadavpuruniversity.in, Phone: +91 98315 94140; Fax: +91-33-2837-1078;
				URL: http://sites.google.com/site/kunalroyindia/

## Sheet: Sheet1_Molecules
Name	Smiles	logBB
1	COC1(NC(=O)C(C(=O)O)c2ccc(O)cc2)C(=O)N2C(C(=O)O)=C(CSc3nnnn3C)COC21	-2.52
2	CN1CC[C@]23c4c5ccc(OC6O[C@H](C(=O)O)[C@@H](O)[C@H](O)[C@H]6O)c4O[C@H]2[C@@H](O)C=C[C@H]3[C@H]1C5	-2.15
3	CN1CC[C@]23c4c5ccc(O)c4O[C@H]2[C@@H](OC2O[C@H](C(=O)O)[C@@H](O)[C@H](O)[C@H]2O)C=C[C@H]3[C@H]1C5	-2.09
4	Cc1ccc(CC2CNC(NCCCCc3ncc(Br)cc3C)NC2=O)cn1	-1.88
5	CN1Cc2c(-c3noc(C(C)(O)O)n3)ncn2-c2cccc(Cl)c2C1=O	-1.82
6	CN1Cc2c(-c3noc([C@](C)(O)CO)n3)ncn2-c2cccc(Cl)c2C1=O	-1.82
7	OC[C@H]1O[C@H](O[C@]2(CO)O[C@H](CO)[C@@H](O)[C@@H]2O)[C@H](O)[C@@H](O)[C@@H]1O	-1.7
8	C=CCc1cccc(/C=N\NC(=O)CN2CCN(Cc3ccc(S(N)(=O)=O)cc3)CC2)c1O	-1.67
9	CC(=O)NC1C(O)OC(COS(=O)(=O)O)C(OC2OC(COS(=O)(=O)O)C(O)C(O)C2O)C1O	-1.54
10	NC(N)=Nc1nc(-c2ccc(O)c(O)c2)cs1	-1.54
11	CCNc1cccnc1N1CCN(C(=O)c2cc3cc(NS(C)(=O)=O)ccc3[nH]2)CC1	-1.52
12	CO[C@H]1/C=C/O[C@@]2(C)Oc3c(C)c(O)c4c(O)c(c(/C=N/N5CCN(C)CC5)c(O)c4c3C2=O)NC(=O)C/C(C)=C\C=C\[C@@H](C)C(O)[C@@H](C)[C@H](O)[C@H](C)[C@H](OC(C)=O)[C@@H]1C	-1.52
13	CN[C@H]1C(=O)N[C@@H]2Cc3ccc(cc3)Oc3cc4cc(c3O[C@@H]3O[C@H](CO)[C@@H](O)[C@H](O)[C@H]3NC(=O)CCCCCCCCC(C)C)Oc3ccc(cc3Cl)[C@@H](O)[C@@H]3NC(=O)[C@H](NC(=O)[C@@H]4NC(=O)[C@@H](NC2=O)c2cc(cc(O)c2Cl)Oc2cc1ccc2O)c1ccc(O)c(c1)-c1c(O[C@H]2O[C@H](CO)[C@@H](O)[C@H](O)[C@@H]2O)cc(O)cc1[C@@H](C(=O)NCCCN(C)C)NC3=O	-1.48
14	CN=C(NC#N)NCCSCC1=NC=NC1C	-1.42
15	CCCc1nc(C)c2c(=O)[nH]c(-c3cc(S(=O)(=O)N4CCN(CC)CC4)ccc3OCC)nn12	-1.4
16	O=C(O)c1cc(=O)c2c(Cl)cc(Cl)cc2[nH]1	-1.33
17	CCCc1nn(C)c2c(=O)[nH]c(-c3cc(S(=O)(=O)N4CCN(C)CC4)ccc3OCC)nc12	-1.3
18	Nc1nc(NCCc2ccc(O)cc2)nc2nc(-c3ccco3)nn12	-1.3
19	O=c1[nH]cnc2c1ncn2[C@@H]1CC[C@H](CO)O1	-1.3
20	CN/C(=C/[N+](=O)[O-])NCCSc1ccc(CN(C)C)o1	-1.23
21	CN=C(C[N+](=O)[O-])NCCCSc1ccc(CN(C)C)o1	-1.23
22	CC(=O)Oc1ccc(/C=C/C(=O)NCCc2ccccc2)cc1OC(C)=O	-1.17
23	Cc1ccc(/C(=C\CN2CCCC2)c2cccc(/C=C/C(=O)O)n2)cc1	-1.14
24	CN(C)Cc1ccc(CSCCNC2N=CC=C2[N+](=O)[O-])o1	-1.12
25	CN(C)CCc1c[nH]c2ccc(CC3COC(=O)N3)cc12	-1.01
26	CCC(C)C1OC2(CCC1C)CC1CC(CC=C(C)C(OC3CC(OC)C(OC4CC(OC)C(O)C(C)O4)C(C)O3)C(C)C=CC=C3COC4C(O)C(C)=CC(C(=O)O1)C34O)O2	-1
27	CN1CC(=O)N2C(Cc3c([nH]c4ccccc34)C2c2ccc3c(c2)OCO3)C1=O	-1
28	COC(=O)[C@@H]1C(=O)C=C(Nc2cccc([N+](=O)[O-])c2)C[C@H]1C	-1
29	Cc1cc2ccccc2n1CCNC(=O)/C=C/c1ccc(OCCO)c(OCCO)c1	-1
30	Cc1c(O)cccc1C(=O)N[C@@H](CSc1ccccc1)[C@@H](O)CN1CC2CCCCC2C[C@H]1C(=O)CNC(C)(C)C	-0.93
31	CCS(=O)(=O)c1ccc(-c2ccc3cc(O)ccc3c2Oc2ccc(OCCN3CCCCC3)cc2)cc1	-0.92
32	Nc1cccc(CN2CCC(NC(=O)[C@](O)(c3ccccc3)[C@@H]3CCC(F)(F)C3)CC2)n1	-0.89
33	CC1CCN(CCC2CCN2S(=O)(=O)C2=CC(O)=CCC2)CC1	-0.89
34	Nc1ccccc1NC(=O)c1ccc(CNC(=O)OCc2ccccc2)cc1	-0.85
35	CS(=O)(=O)c1ccc(-c2ccc3cc(O)ccc3c2Oc2ccc(OCCN3CCCCC3)cc2)cc1	-0.81
36	C=C(C)C(=O)/C(=C/C(=O)O)OC	-0.8
37	CCn1nnc(NC(=O)C2c3ccccc3Oc3ccccc32)n1	-0.8
38	CN1CCN(Cc2ccc(Nc3ncc(Cl)c(Nc4ccccc4S(=O)(=O)N(C)C)n3)cc2)CC1	-0.8
39	C/C=C/C(C)C(O)C1C(=O)NC(CC)C(=O)N(C)CC(=O)N(C)C(CC(C)C)C(=O)NC(C(C)C)C(=O)N(C)C(CC(C)C)C(=O)NC(C)C(=O)NC(C)C(=O)N(C)C(CC(C)C)C(=O)N(C)C(CC(C)C)C(=O)N(C)C(CC(C)C)C(=O)N1C	-0.78
40	C/C=C/[C@@H](C)[C@@H](O)[C@@H]1C(=O)N[C@H](CC)C(=O)N(C)CC(=O)N(C)[C@H](CC(C)C)C(=O)N[C@H](C(C)C)C(=O)N(C)[C@H](CC(C)C)C(=O)N[C@H](C)C(=O)N[C@H](C)C(=O)N(C)[C@H](CC(C)C)C(=O)N(C)[C@H](CC(C)C)C(=O)N(C)[C@H](CC(C)C)C(=O)N1C	-0.78
41	C/C=C/[C@@H](C)[C@@H](O)[C@H]1C(=O)N[C@@H](CC)C(=O)N(C)CC(=O)N(C)[C@@H](CC(C)C)C(=O)N[C@@H](C(C)C)C(=O)N(C)[C@@H](CC(C)C)C(=O)N[C@@H](C)C(=O)N[C@H](C)C(=O)N(C)[C@@H](CC(C)C)C(=O)N(C)[C@@H](CC(C)C)C(=O)N(C)[C@@H](CC(C)C)C(=O)N1C	-0.78
42	CC=CCC(C)C(O)C1C(=O)NC(CC)C(=O)N(C)CC(=O)N(C)C(CC(C)C)C(=O)NC(C(C)C)C(=O)N(C)C(CC(C)C)C(=O)NC(C)C(=O)NC(C)C(=O)N(C)C(CC(C)C)C(=O)N(C)C(CC(C)C)C(=O)N(C)C(C(C)C)C(=O)N1C	-0.78
43	Oc1ccc(-c2ccc3cc(O)ccc3c2Oc2ccc(OCCN3CCCCC3)cc2)cc1	-0.77
44	CN(C)Cc1ccc(CSCCNc2cc(Cc3ccccc3)c[nH]2)o1	-0.73
45	Cc1cn(C2CC(NN=N)C(CO)O2)c(=O)[nH]c1=O	-0.72
46	Cc1cn([C@@H]2C[C@H](N=[N+]=[N-])[C@H](CO)O2)c(=O)[nH]c1=O	-0.72
47	C/C=C/CC(C)C(O)C1C(=O)NC(CC)C(=O)N(C)CC(=O)N(C)C(CC(C)C)C(=O)NC(C(C)C)C(=O)N(C)C(CC(C)C)C(=O)NC(C)C(=O)NC(C)C(=O)N(C)C(CC(C)C)C(=O)N(C)C(CC(C)C)C(=O)N(C)C(C(C)C)C(=O)N1C	-0.7
48	CC(C)c1nc(CN(C)C(=O)NC(C(=O)NC(Cc2ccccc2)CC(O)C(Cc2ccccc2)NC(=O)OCc2cncs2)C(C)C)cs1	-0.7
49	COc1ccc(CCN(C)CCC[C@](C#N)(c2ccc(OC)c(OC)c2)C(C)C)cc1OC	-0.7
50	O=C1CC=[N+](C2CC(F)C(CO)O2)C(=O)N1	-0.69
51	NC(=O)c1cnn(C2OC(CO)C(O)C2O)n1	-0.67
52	Nc1cc(N)c(N)cc1N	-0.67
53	O=[N+]([O-])C1=CC=NC1NCCSCc1ncccc1Br	-0.67
54	Cc1cccc(COc2cccc(/C=C3\C(=O)NN(c4ccccc4)C3=O)c2)c1	-0.66
55	O=C1NCC(c2ccccc2)C2(CCN(C(=O)c3cc(C(F)(F)F)cc(C(F)(F)F)c3)CC2)O1	-0.66
56	O=[N+]([O-])C1=CC=NC1NCCSCc1ccccn1	-0.66
57	CCC(C)n1ncn(-c2ccc(N3CCN(c4ccc(OCC5COC(Cn6cncn6)(c6ccc(Cl)cc6Cl)O5)cc4)CC3)cc2)c1=O	-0.64
58	CC(=O)Cc1ccc(C(=O)Nc2cc(-c3cccs3)ccc2N)cc1	-0.62
59	COc1ccc2c3c1O[C@H]1[C@H](O)CC[C@@]4(O)C(C2)N(C)CC[C@]314	-0.6
60	Cc1nc(N2CCc3ccccc3CC2)c([N+](=O)[O-])c(=O)[nH]1	-0.59
61	O=C(Cc1ccc(OCc2ccccc2)cc1)Nc1ccc2ccn(CCN3CCCC3)c2c1	-0.59
62	CC(=O)Nc1ccc(C(=O)Nc2ccccc2N)cc1	-0.58
63	Oc1cccc(-c2ccc3cc(O)ccc3c2Oc2ccc(OCCN3CCCCC3)cc2)c1	-0.57
64	CC(=O)OC1C(=O)[C@]2(C)[C@@H](O)C[C@H]3OCC3(OC(C)=O)[C@H]2C(OC(=O)c2ccccc2)[C@]2(O)C[C@H](OC(=O)[C@H](O)C(NC(=O)c3ccccc3)c3ccccc3)C(C)=C1C2(C)C	-0.55
65	CN(C)c1ccc(O)c2c1C[C@H]1C[C@H]3[C@@H](N(C)C)C(=O)C(C(N)=O)=C(O)[C@@]3(O)C(=O)C1=C2O	-0.52
66	CN(C)c1ccc(O)c2c1C[C@H]1C[C@H]3[C@H](N(C)C)C(=O)C(C(N)=O)=C(O)[C@@]3(O)C(=O)C1=C2O	-0.52
67	COc1cc(/C=C/C(=O)NCCn2c(C)cc3ccccc32)cc(OC)c1OC	-0.52
68	O=c1[nH]c2ccc([S+]([O-])CCN3CCC(Cc4ccc(F)cc4)CC3)cc2o1	-0.52
69	O=C(CF)NCCCCCC(=O)Nc1ccccc1	-0.51
70	CC1=C(/C=C/C(C)=C/C=C/C(C)=C\C(=O)O)C(C)(C)CCC1	-0.49
71	CC1=C(/C=C/C(C)=C/C=C/C(C)=C/C(=O)O)C(C)(C)CCC1	-0.49
72	CC(C)(C)NC(=O)[C@@]1(c2c(C(=O)O)[nH]c3cc(Cl)ccc23)N2C(=O)[C@]21c1ccc(OCc2ccc(Cl)cc2)cc1	-0.46
73	CC1CN(Cc2ncccn2)CC1c1nc2c(cnn2C2CCOCC2)c(=O)[nH]1	-0.4
74	Cc1nc(NC(=O)C2c3ccccc3Oc3ccccc32)no1	-0.4
75	CC(C)(C)/[N+]([O-])=C/c1cc[n+]([O-])cc1	-0.38
76	CN(C)S(=O)(=O)c1ccc(-c2ccc3cc(O)ccc3c2Oc2ccc(OCCN3CCCCC3)cc2)cc1	-0.37
77	CC(=O)O[C@H]1Cc2ccccc2[C@@H](C(N)=O)c2ccccc21	-0.34
78	NC(=O)[C@@H]1c2ccccc2[C@@H]2O[C@@H]2c2ccccc21	-0.34
79	CN1C(=O)CC[C@H]1c1cccnc1	-0.32
80	CC(=O)OC1C(=O)C2(C)C(O)CC3OCC3(OC(C)=O)C2C(OC(=O)c2ccccc2)C2(O)CC(OC(=O)C(O)C(NC(=O)c3ccccc3)c3ccccc3)C(C)=C1C2(C)C	-0.3
81	CC(C)c1nc(-c2ncn3c2CNC(=O)c2c(Cl)cccc2-3)no1	-0.3
82	N#Cc1cc(C2=Nc3ccc(-c4ccccc4F)cc3NC(=O)C2)ccn1	-0.3
83	CN1C(=O)C2N=CN=C2N(C)C1=O	-0.29
84	CN1C(=O)C2NC=NC2N(C)C1=O	-0.29
85	CN(C)Cc1ccnc(-c2cccc(NC3N=CC=C3[N+](=O)[O-])c2)c1	-0.28
86	CN(C)Cc1ccnc(-c2cccc(NC3NC=CC3[N+](=O)[O-])c2)c1	-0.28
87	CN(C)Cc1ccc(-c2cccc(NC3N=CC=C3[N+](=O)[O-])c2)o1	-0.27
88	CN1CN(c2ccccc2)C2(CCN(CCCC(=O)c3ccc(I)s3)CC2)C1=O	-0.25
89	NC(=O)c1ccccc1	-0.24
90	COc1cc(N)c(Cl)cc1C(=O)N[C@@H]1CCNC[C@@H]1OC	-0.22
91	C[C@]12C[C@H](O)[C@H]3[C@@H](CCC4=CC(=O)CC[C@@]43C)[C@@H]1CC[C@]2(O)C(=O)CO	-0.22
92	Nc1nc(NC2CC2)c2ncn([C@H]3C=C[C@@H](CO)C3)c2n1	-0.22
93	OCC(O)CO	-0.21
94	Clc1ccc(C(Cn2ccnc2)OCc2ccsc2Cl)c(Cl)c1	-0.2
95	NNCCc1ccccc1	-0.2
96	CC(C)Cc1ccc([C@@H](C)C(=O)O)cc1	-0.18
97	C[C@]12C[C@H](O)[C@H]3[C@@H](CCC4=CC(=O)C=C[C@@]43C)[C@@H]1CC[C@]2(O)C(=O)CO	-0.18
98	C=CCc1cccc(/C=N\NC(=O)CN2CCN(Cc3ccccc3)CC2)c1O	-0.17
99	CC(N)C(=O)O	-0.17
100	COC(=O)[C@@H]1C(=O)C=C(Nc2cccc(OC(F)(F)F)c2)C[C@H]1C	-0.17
101	Cn1nnc2ccc([C@H](c3ccc(Cl)cc3)n3cncn3)cc21	-0.16
102	N#Cc1ccsc1C1=Nc2ccc(Cl)cc2NC(=O)C1	-0.14
103	CC(C)NCCCOc1cccc(CN2CCCCC2)c1	-0.13
104	CC(C)n1nnc(NC(=O)C2c3ccccc3Oc3ccccc32)n1	-0.12
105	CN1C[C@H](CCn2c3c(c4ccccc42)C(=O)NCC3)CC1=O	-0.12
106	CN(C)C1CCN(Cc2ccc(C(=O)Nc3cc(-c4ccccc4)ccc3N)cc2)CC1	-0.11
107	Cc1cc(-c2cc(N)n3nc(-c4ccccn4)nc3c2)ccn1	-0.1
108	COC1/C=C\C=C(\C)C(=O)NC2=CC(=O)C(NCCN(C)C)=C(CC(C)CC(OC)C(O)C(C)/C=C(/C)C1OC(N)=O)C2=O	-0.09
109	CO[C@H]1/C=C\C=C(/C)C(=O)NC2=CC(=O)C(NCCN(C)C)=C(C[C@H](C)C[C@@H](OC)[C@@H](O)[C@H](C)/C=C(\C)[C@@H]1OC(N)=O)C2=O	-0.09
110	Cn1nc(CC(=O)NC2CC[N+]3(C)CCCC2C3)c2ccccc21	-0.08
111	CC1CCN(CCC2CCN2S(=O)(=O)c2cccc(O)c2)CC1	-0.08
112	COc1cc2c(cc1OC)[C@H]1Cc3ccc(OC)c(OC)c3CN1CC2	-0.07
113	Cn1cc(-c2ccncc2)c(-c2ccc(OCc3ccc4ccccc4n3)cc2)n1	-0.06
114	CN1C(=O)C2C(N=CN2C)N(C)C1=O	-0.06
115	CNCc1ccc(C(=O)Nc2cc(-c3ccccc3)ccc2N)cc1	-0.05
116	CC1C=[N+](C2CC(N=[N+]=N)C(CO)O2)C(=O)NC1=O	-0.05
117	CN1CCCC12CCN(Cc1ccc(C(=O)Nc3cc(-c4ccccc4)ccc3N)cc1)CC2	-0.03
118	CCN1CN(c2ccccc2)C2(CCN(CCCC(=O)c3ccc(F)cc3)CC2)C1=O	-0.01
119	CC(=O)[C@]1(O)Cc2c(O)c3c(c(O)c2[C@@H](O[C@H]2C[C@H](N)[C@H](O)[C@H](C)O2)C1)C(=O)c1ccccc1C3=O	0
120	CC(C)CC(N)C(=O)O	0
121	N#Cc1c(COc2ccccn2)nc(N)nc1-c1ccco1	0
122	N#Cc1c(N2CCc3ccccc3CC2)ncn(CCO)c1=O	0
123	NC(=Nc1ccccc1)Nc1ccccc1	0
124	OCCN(CCO)c1nc(N2CCCCC2)c2nc(N(CCO)CCO)nc(N3CCCCC3)c2n1	0
125	C[C@H](Nc1cc(-c2c(-c3cccc(C(F)(F)F)c3)nc(C3CCNCC3)n2C)ccn1)c1ccccc1	0.01
126	C=CCOc1ccccc1OCC(O)CNC(C)C	0.02
127	O=C(CC1=NC2NN(c3ccccc3)C(=O)C2=C1CC(=O)c1cccc2ccccc12)c1cccc2ccccc12	0.02
128	N#[N+]O	0.03
129	CCn1c(C)nc(N2CCc3ccccc3CC2)c([N+](=O)[O-])c1=O	0.04
130	N[C@@H](Cc1ccc(B(O)O)cc1)C(=O)O	0.05
131	CCCN(CCC)c1cc(C)nc2c(-c3cnc(N(C)C)cc3C)c(C)nn12	0.07
132	CC[C@@]1(O)C[C@@H]2CN(CCc3c([nH]c4ccccc34)[C@](C(=O)OC)(c3cc4c(cc3OC)N(C)C3[C@@](O)(C(=O)OC)[C@H](OC(C)=O)[C@]5(CC)C=CCN6CC[C@]43C65)C2)C1	0.07
133	CNC(=O)Oc1ccc2c(c1)[C@@]1(C)CCN(C)[C@@H]1N2C	0.08
134	O=C(O)c1ccccc1C(=O)OC1CCc2ccccc2C1	0.09
135	CN1C2=C3N=c4ccccc4=C3CCN2C(=O)c2ccccc21	0.11
136	Clc1cccc(Cl)c1N[C@@H]1N=CCN1	0.11
137	CCC[C@@H](C)C1(CC)C(=O)NC(=O)NC1=O	0.12
138	F/C=C\O/C=C/F	0.13
139	FC=COC=CF	0.13
140	CC(O)C(=O)O	0.16
141	O=C1CCCN1CCCCN1CCN(c2cc(C(F)(F)F)cc(Cl)n2)CC1	0.16
142	N#Cc1cccc(-c2ccc3cc(O)ccc3c2Oc2ccc(OCCN3CCCCC3)cc2)c1	0.17
143	COc1ccc2c3c1O[C@H]1C[C@@H](O)C=C[C@@]31CCNC2	0.18
144	CC(=O)O[C@H]1C(=O)[C@@]2(C)[C@@H](O)C[C@H]3OC[C@@]3(OC(C)=O)[C@H]2[C@@H](OC(=O)c2ccccc2)[C@]2(O)C[C@H](OC(=O)[C@@H](O)[C@H](NC(=O)c3ccc(F)cc3)c3ccccc3)C(C)=C1C2(C)C	0.19
145	CC(=O)O[C@H]1C(=O)[C@]2(C)[C@@H](O)C[C@H]3OC[C@@]3(OC(C)=O)[C@H]2[C@H](OC(=O)c2ccccc2)[C@]2(O)C[C@H](OC(=O)[C@H](O)[C@@H](NC(=O)c3ccc(F)cc3)c3ccccc3)C(C)=C1C2(C)C	0.19
146	CCC(=O)N(c1ccccc1)C1(COC)CCN(CCc2cccs2)CC1	0.2
147	CN(C)Cc1ccccc1Sc1cc(F)c(Cl)cc1N	0.2
148	COCCn1c(C)nc(N2CCC(c3ccc(F)cc3)CC2)c([N+](=O)[O-])c1=O	0.2
149	CN1[C@H]2CC(OC(=O)C(CO)c3ccccc3)C[C@H]1[C@H]1O[C@@H]21	0.23
150	COc1cc(/C=C/C(=O)NCCn2c(C(F)(F)F)cc3ccccc32)cc(OC)c1OC	0.23
151	CSc1ccc2c(c1)N(CC[C@H]1CCCCN1C)c1ccccc1S2	0.24
152	CCCN1CCC[C@@H]2Cc3nc(N)ncc3C[C@H]21	0.25
153	F[C@H](Br)C(F)(F)F	0.27
154	CC(C)=CCN1Cc2cc(Cl)cc3[nH]c(=S)n(c23)C[C@@H]1C	0.28
155	Cc1nccn1CC1CCc2c(c3ccccc3n2C)C1=O	0.28
156	CCC(NC(=O)c1c(C)c(-c2ccccc2)cc2ccccc12)c1ccccc1	0.3
157	COc1ccc(C2Sc3ccccc3N(CCN(C)C)C(=O)C2OC(C)=O)cc1	0.3
158	COc1ccc([C@@H]2Sc3ccccc3N(CCN(C)C)C(=O)[C@@H]2OC(C)=O)cc1	0.3
159	Cc1nc2sccn2c(=O)c1CCN1CCC(=C(c2ccc(F)cc2)c2ccc(F)cc2)CC1	0.3
160	N#Cc1cccc(C2=Nc3ccc(C#Cc4ccccc4)cc3NC(=O)C2)c1	0.3
161	O=C1CN=C(c2ccccc2)c2cc([N+](=O)[O-])ccc2N1	0.32
162	CCc1cc2cc(C(=O)C3CCC(OC)CC3)ccc2nc1C	0.33
163	Cc1ccccc1-c1ccc(N)cc1N(C)C(=O)C(C)(C)c1cc(C(F)(F)F)cc(C(F)(F)F)c1	0.34
164	CN1CC[C@]23c4c5ccc(O)c4O[C@H]2C(=O)CC[C@@]3(O)[C@H]1C5	0.35
165	FC(F)(F)[C@H](Cl)Br	0.35
166	CN(C)c1ccc(O)c(CNc2cccc3ccc(CO)nc23)c1	0.38
167	Clc1ccc2c(c1)[C@H]1CNC[C@@H]1c1ccccc1O2	0.39
168	COc1cc2c(c(CN[C@H]3CCCN[C@@H]3c3ccccc3)c1)OCC2	0.39
169	Cc1cccc2c1Oc1ccccc1C1(O)CNCC21	0.39
170	OCCOCCN1CCN([C@@H](c2ccccc2)c2ccc(Cl)cc2)CC1	0.39
171	CC[C@H](C)[C@H]1O[C@@]2(CC[C@H]1C)C[C@@H]1C[C@@H](CC=C(C)[C@@H](O[C@H]3C[C@H](OC)[C@@H](O[C@H]4C[C@H](OC)[C@H](O)[C@H](C)O4)[C@H](C)O3)[C@H](C)C=CC=C3COC4[C@H](O)C(C)=C[C@@H](C(=O)O1)[C@]34O)O2	0.4
172	CN1CCC[C@H]1c1cccnc1	0.4
173	CCN(CCC#N)c1ccccc1	0.42
174	FC(F)O[C@H](Cl)C(F)(F)F	0.42
175	N#CCCNCCc1ccccc1	0.42
176	CN(C)c1ccnc2sc3c(=O)n(C4CCCCCC4)cnc3c12	0.43
177	O=C(NCCCCN1CCC(Oc2cccc(C(F)(F)F)c2)CC1)c1ccnc2ccccc12	0.48
178	CC(C)=CCN1CC[C@@]2(C)c3cc(O)ccc3CC1C2C	0.51
179	CCc1cc2c(s1)N(C)C(=O)CN=C2c1ccccc1Cl	0.51
180	C/C=C/C[C@@H](C)[C@@H](O)[C@H]1C(=O)N[C@@H](CC)C(=O)N(C)CC(=O)N(C)[C@@H](CC(C)C)C(=O)N[C@@H](C(C)C)C(=O)N(C)[C@@H](CC(C)C)C(=O)N[C@@H](C)C(=O)N[C@H](C)C(=O)N(C)[C@@H](CC(C)C)C(=O)N(C)[C@@H](CC(C)C)C(=O)N(C)[C@@H](C(C)C)C(=O)N1C	0.52
181	C/C(=C(\CCOC(=O)C(N)Cc1ccc(OC(=O)C(C)(C)C)c(OC(=O)C(C)(C)C)c1)SSC(C)C)N(C)C=O	0.53
182	COc1ccc2c3c1O[C@H]1[C@@H](O)C=C[C@H]4C(C2)N(C)CCC341	0.55
183	COc1ccc2c3c1O[C@H]1[C@H](O)C=C[C@H]4[C@@H](C2)N(C)CC[C@@]341	0.55
184	CCC1(O)CC(OC2CC(N3CCOCC3)C(O)C(C)O2)c2c(O)c3c(c(O)c2C1O)C(=O)c1cccc(O)c1C3=O	0.56
185	CC[C@@]1(O)C[C@H](O[C@H]2C[C@H](N3CCOCC3)[C@H](O)[C@H](C)O2)c2c(O)c3c(c(O)c2[C@H]1O)C(=O)c1cccc(O)c1C3=O	0.56
186	CN1CCN(Cc2ccc(C(=O)Nc3cc(-c4ccccc4)ccc3N)cc2)CC1	0.56
187	COc1cccc(CN)c1O	0.56
188	COC1=C2O[C@H]3C(=O)C=C[C@H]4[C@H]5CC(C=C1)C2[C@@]34CCN5C	0.57
189	CN(c1nc2ccccc2s1)C1CCN(CC(O)COc2ccc(F)c(F)c2)CC1	0.59
190	CN(c1nc2ccccc2s1)C1CCN(C[C@H](O)COc2ccc(F)c(F)c2)CC1	0.59
191	CN(C)Cc1ccc(C(=O)Nc2ccccc2N)cc1	0.6
192	Cc1nc(N2CCc3ccccc3CC2)c(C#N)c(=O)n1CC(F)(F)F	0.6
193	O=C1Nc2ccc(Cl)cc2C(c2ccccc2)=N[C@H]1O	0.61
194	Cc1ccccc1-c1ccncc1C(=O)N(C)Cc1cc(C(F)(F)F)cc(C(F)(F)F)c1	0.68
195	COc1ccc(-c2nc(-c3cccc(CN(C)C)c3)n(CCO)n2)cc1	0.71
196	Oc1ccc2c(Oc3ccc(OCCN4CCCCC4)cc3)c(-c3cccc(F)c3)ccc2c1	0.73
197	CCCCCCNC(=O)C(c1ccccc1)c1ccccc1	0.74
198	CCCCN1C2CC[C@@H]1C[C@@H](OC(c1ccc(F)cc1)c1ccc(F)cc1)C2	0.74
199	NCc1cccc(NC(=O)c2ccc3ccccc3c2)c1	0.74
200	CCCCN1[C@H]2CC[C@@H]1CC(OC(c1ccc(F)cc1)c1ccc(F)cc1)C2	0.75
201	CN(C)Cc1ccc(C(=O)Nc2cc(-c3cccs3)ccc2N)cc1	0.77
202	Cc1ccc(/C(=C/CN2CCCC2)c2ccccn2)cc1	0.77
203	COc1ccccc1N1CCN(CCCCNC(=O)c2ccc3ccccc3c2)CC1	0.78
204	N[C@@H]1C[C@H]1c1ccc(F)cc1	0.81
205	CN(C)CCCN1c2ccccc2CCC2CCCCCC21	0.83
206	CN(C)CCCN1c2ccccc2Cc2ccccc21	0.83
207	CN(C)Cc1ccc(C(=O)Nc2cc(-c3ccccc3)ccc2N)cc1	0.88
208	CN(Cc1cc(C(F)(F)F)cc(C(F)(F)F)c1)C(=O)c1cnccc1-c1ccccc1Cl	0.89
209	CCC(=O)NC1CCC(CCN2CCN(c3cccc(Cl)c3Cl)CC2)CC1	0.9
210	CCC[C@H](C)CC	0.9
211	COc1ccc(-c2cc(NCCO)c3ccccc3n2)cc1	0.9
212	COc1ccc(CCN2CCN(CCCc3ccccc3I)CC2)cc1OC	0.9
213	Oc1ccc2c(Oc3ccc(OCCN4CCCCC4)cc3)c(-c3ccc(F)c(F)c3)ccc2c1	0.92
214	COc1ccc(C(C)(C)C)cc1CN[C@H]1CCCN[C@H]1c1ccccc1	0.98
215	CS(=O)(=O)NC1CCC(CCN2CCN(c3cccc(Cl)c3Cl)CC2)CC1	1
216	CN(C)CCCN1c2ccccc2CCc2ccc(Cl)cc21	1.04
217	O=C(NCCCCN1CCC(Oc2cccc(C(F)(F)F)c2)CC1)c1ccc(Br)cc1	1.04
218	CN1CCC2c3cc(Cl)ccc3Oc3ccccc3C2C1	1.06
219	CC(=O)NC1CCC(CCN2CCN(c3cccc(Cl)c3Cl)CC2)CC1	1.08
220	COc1ccc(OC(F)(F)F)cc1CN[C@H]1CCCN[C@@H]1c1ccccc1	1.11
221	COc1ccc(OC(F)(F)F)cc1CN[C@H]1CCCN[C@H]1c1ccccc1	1.11
222	C[C@]12N[C@H](Cc3ccccc31)c1ccccc12	1.11
223	O=C(NCCCCN1CCC(Nc2cccc(C(F)(F)F)c2)CC1)c1ccc(Br)cc1	1.18
224	Oc1ccc2c(Oc3ccc(OCCN4CCCCC4)cc3)c(-c3ccc(F)cc3)ccc2c1	1.25
225	OC(CCN1CCCCC1)(c1ccccc1)C1CCCCC1	1.32
226	CC(C)N1CCN(c2ccc(I)cc2)CC1	1.38
227	O=C(CCCN1CCCN(c2ccc(Cl)cc2)CC1)c1ccc(F)cc1	1.48
228	CN(C)CCC(c1ccc(Cl)cc1)c1ccccn1	1.53
229	CCNC(=NCCSCc1ncccc1Br)NC#N	-2.15
230	O=C1CN(/N=C/c2ccc([N+](=O)[O-])o2)C(=O)N1	-2.09
231	COc1cc(C2c3cc4c(cc3C(OC3OC5COC(C)OC5C(O)C3O)C3COC(=O)C23)OCO4)cc(OC)c1O	-2
232	COc1cccnc1CCCCNc1ncc(Cc2ccc(C)nc2)c(=O)[nH]1	-2
233	CCC(CC)O[C@@H]1C=C(C(=O)O)C[C@H](N)[C@@H]1NCOC	-1.96
234	Cc1ccc(Cc2cnc(NCCCCc3ncc(Br)cc3C)[nH]c2=O)cn1	-1.9
235	COC1(NC(=O)C2SC(=C(C(N)=O)C(=O)O)S2)C(=O)N2C(C(=O)O)=C(CSc3nnnn3C)CSC21	-1.89
236	CO[C@@]1(NC(=O)C2SC(=C(C(N)=O)C(=O)O)S2)C(=O)N2C(C(=O)O)=C(CSc3nnnn3C)CS[C@@H]21	-1.89
237	CN1Cc2c(-c3noc(C(C)(O)CO)n3)ncn2-c2cccc(Cl)c2C1=O	-1.82
238	CC(C)c1nc(CN(C)C(=O)N[C@@H](C)C(=O)C[C@@H](Cc2ccccc2)C[C@H](O)[C@H](Cc2ccccc2)NC(=O)OCc2cncs2)cs1	-1.82
239	CN1Cc2c(-c3noc(C(C)(CO)CO)n3)ncn2-c2cccc(Cl)c2C1=O	-1.82
240	CCOC(=O)N1CSCC1C(=O)O	-1.72
241	O=C1c2c(O)cc(O)cc2CC(c2ccc(O)c(O)c2)C1O	-1.7
242	CC(C(=O)O)c1ccc(-c2ccccc2)c(F)c1	-1.68
243	OCC(O)C(O)C(O)C(O)CO	-1.6
244	CC(=O)Nc1cccc(-c2csc(N=C(N)N)n2)c1	-1.57
245	CC(C)CC(=O)c1ccc(OCCCCOc2ccc(CCC(=O)O)c(O)c2)cc1O	-1.52
246	CC(C)CC(=O)c1ccc(OCCCCOc2ccc3ccc(=O)oc3c2)cc1O	-1.52
247	CN(Cc1cnc2nc(N)nc(N)c2n1)c1ccc(C(=O)NC(CCC(=O)O)C(=O)O)cc1	-1.52
248	CN(Cc1cnc2nc(N)nc(N)c2n1)c1ccc(C(=O)N[C@@H](CCC(=O)O)C(=O)O)cc1	-1.5
249	Nc1ccn([C@@H]2CC[C@@H](CO)O2)c(=O)n1	-1.5
250	CC(C)NC(O)COc1ccc(CC(N)=O)cc1	-1.42
251	CC1(C(=O)O)CCC2(C)CCC3(C)C(=CC(=O)C4C5(C)CCC(O)C(C)(C)C5CCC43C)C2C1	-1.4
252	CCCn1c(=O)c2[nH]c(C3CCC(=O)C3)nc2n(CCC)c1=O	-1.4
253	CCCn1c(=O)c2[nH]c([C@H]3CCC(=O)C3)nc2n(CCC)c1=O	-1.4
254	COC(=O)Nc1nc2ccc(C(=O)N3CCN(c4ccccn4)CC3)cc2[nH]1	-1.4
255	COc1nccc(-c2c(-c3ccc(F)cc3)ncn2C2CCC(O)CC2)n1	-1.4
256	CC(C)c1c(C(=O)Nc2ccccc2)c(-c2ccccc2)c(-c2ccc(F)cc2)n1CC[C@@H](O)C[C@@H](O)CC(=O)O	-1.36
257	CN1[C@H]2CC[C@H]1[C@@H](CC(=O)O)[C@@H](OC(=O)c1ccccc1)C2	-1.35
258	CN1Cc2c(-c3noc(C(C)(C)O)n3)ncn2-c2cccc(Cl)c2C1=O	-1.34
259	CN(C)Cc1ccc(CSCCNc2nc(=O)c(Cc3ccc4ccccc4c3)c[nH]2)o1	-1.3
260	COc1ccc2c(c1)c(CC(=O)O)c(C)n2C(=O)c1ccc(Cl)cc1	-1.3
261	COc1cccnc1CCCCNc1ncc(Cc2cccc(C)n2)c(=O)[nH]1	-1.3
262	Cc1nc(Nc2ncc(C(=O)Nc3c(Cl)cccc3Cl)s2)cc(N2CCN(CCO)CC2)n1	-1.3
263	N#CC(c1ccc(Cl)cc1)c1c(Cl)cc(-n2ncc(=O)[nH]c2=O)cc1Cl	-1.3
264	O=C(O)Cc1ccccc1Nc1c(Cl)cccc1Cl	-1.3
265	O=c1[nH]cnc2c1ncn2[C@H]1CC[C@@H](CO)O1	-1.3
266	COc1ccc2c(c1)C(CC(=O)O)C(C)N2C(=O)c1ccc(Cl)cc1	-1.26
267	COc1ccc2c(c1)[C@@H](CC(=O)O)[C@H](C)N2C(=O)c1ccc(Cl)cc1	-1.26
268	O=C(O)c1ccc(-c2ccccc2)cc1	-1.26
269	CN/C(=C\[N+](=O)[O-])NCCSCc1ccc(CN(C)C)o1	-1.23
270	CN/C(=N\C[N+](=O)[O-])NCCSCc1coc(CN(C)C)c1	-1.23
271	CN=C(C[N+](=O)[O-])NCCSCc1ccc(CN(C)C)o1	-1.23
272	CNC(=C[N+](=O)[O-])NCCSCc1ccc(CN(C)C)o1	-1.23
273	CNC(C[N+](=O)[O-])=NCCSc1ccc(CN(C)C)o1	-1.23
274	C[C@H]1O[C@@H](O[C@H]2[C@@H](O)C[C@H](O[C@H]3[C@@H](O)C[C@H](O[C@H]4CC[C@]5(C)[C@H]6C[C@@H](O)[C@]7(C)C(C8=CC(=O)OC8)CC[C@]7(O)[C@@H]6CC[C@@H]5C4)O[C@@H]3C)O[C@@H]2C)C[C@H](O)[C@@H]1O	-1.23
275	CO[C@H]1CN(CC2Cc3ccc(NC(=O)C(C)C)cc3C2)CCC1n1c(C)nc2cc(C)ccc21	-1.22
276	Nc1nc(=O)n([C@@H]2CS[C@H](CO)O2)cc1F	-1.22
277	NC(N)=Nc1nc(-c2cccc(N)c2)cs1	-1.15
278	CCOc1ccc(Cc2nc3cc(N(C)S(=O)(=O)c4cccs4)ccc3n2CC2CCCCC2)nc1	-1.15
279	CCS(=O)(=O)n1c2c(c3cc(C(=O)N4CCC(C)CC4)ccc31)CN(C1CCOCC1)CC2	-1.15
280	CN(C)Cc1ccc(SCCNc2[nH]ccc2[N+](=O)[O-])o1	-1.12
281	CCN1CCCC1CNC(=O)c1cc(S(N)(=O)=O)ccc1OC	-1.11
282	CC(C)CC1C(=O)N2CCCC2C2(O)OC(NC(=O)C3C=C4c5cccc6[nH]c(Br)c(c56)CC4N(C)C3)(C(C)C)C(=O)N12	-1.1
283	CC(C)C[C@H]1C(=O)N2CCC[C@H]2[C@]2(O)O[C@](NC(=O)[C@@H]3C=C4c5cccc6[nH]c(Br)c(c56)C[C@H]4N(C)C3)(C(C)C)C(=O)N12	-1.1
284	CN1CC(C(=O)NC2(C)OC3(O)C4CCCN4C(=O)C(Cc4ccccc4)N3C2=O)CC2C3=CC=CC4NC=CC(=C34)CC21	-1.1
285	Cc1ccc(Cc2cnc(NCCSCc3ccc(CN(C)C)o3)[nH]c2=O)cn1	-1.1
286	CCCCc1oc2ccccc2c1C(=O)c1cc(I)c(OCCN(CC)CC)c(I)c1	-1.08
287	Cc1ccc(Cc2cnc(NCCSCc3ccc(C(C)(C)N)o3)[nH]c2=O)cn1	-1.06
288	CN(C)CCc1c[nH]c2ccc(C[C@H]3COC(=O)N3)cc12	-1.04
289	CC[C@]1(O)C[C@H]2CN(CCc3c([nH]c4ccccc34)[C@@](C(=O)OC)(c3cc4c(cc3OC)N(C=O)[C@H]3[C@@](O)(C(=O)OC)[C@H](OC(C)=O)[C@]5(CC)C=CCN6CC[C@]43[C@@H]65)C2)C1	-1.03
290	CC(C)(C)c1ccc(C(=O)N2CCN(c3ccc(OCCCN4CCCCC4)cc3)C(=O)C2)cc1	-1
291	CCC(NC(=O)c1c(OCC(=O)O)c(-c2ccccc2)nc2ccccc12)c1ccccc1	-1
292	CCOC(=O)C1=C[C@@H](OC(CC)CC)[C@@H](NCOC)[C@@H](N)C1	-1
293	CCOC(=O)NNc1ccc(N(CC(C)O)C(C)C)nn1	-1
294	CN(C)C(=O)Cn1nc(-c2c(-c3ccccc3)nn3ccccc23)ccc1=O	-1
295	COC(=O)C1C(=O)C=C(Nc2cccc([N+](=O)[O-])c2)CC1C	-1
296	COc1cc(N)cn[n+]1-c1ccccc1	-1
297	COc1cc2c(cc1CNC1C3CCN(C3)C1C(c1ccccc1)c1ccccc1)N(S(C)(=O)=O)CC2	-1
298	Cc1ccc(-c2cc(C(F)(F)F)nn2-c2ccc(S(N)(=O)=O)cc2)cc1	-1
299	Clc1cccc(C(c2ccc3nc[nH]c3c2)n2ccnc2)c1	-1
300	O=C(O)CCCCO/N=C(\c1cccnc1)c1cccc(C(F)(F)F)c1	-1
301	O=C(c1ccc(C(=O)N2CCN(c3ccc(OC4CCN(C5CCC5)CC4)cc3)C(=O)C2)cc1)N1CCC1	-1
302	Oc1cc(-c2nc(-c3ccccc3)[nH]c2-c2ccncc2)ccc1Cl	-1
303	CC(C)(C)NCC(O)COc1cccc2c1CC(O)C(O)C2	-0.95
304	Cc1c(O)cccc1C(=O)NC(CSc1ccccc1)C(O)CN1CC2CCCCC2CC1C(=O)NC(C)(C)C	-0.93
305	COn1cc(C(=O)O)c(=O)c2cc3c(cc21)OCO3	-0.92
306	COc1cc2nc(N3CCN(C(=O)c4ccco4)CC3)nc(N)c2cc1OC	-0.9
307	COc1ccc(Cl)cc1C(=O)NCCc1ccc(S(=O)(=O)NC(=O)NC2CCCCC2)cc1	-0.9
308	C[C@]12CC(=O)[C@H]3[C@@H](CCC4=CC(=O)C=C[C@@]43C)[C@@H]1CCC2(O)C(=O)CO	-0.9
309	Nc1cccc(CN2CCC(NC(=O)C(O)(c3ccccc3)C3CCC(F)(F)C3)CC2)n1	-0.89
310	Cc1cc(Cl)ccc1NC1=NCCN1	-0.87
311	CN(C)CCOc1ccc(-c2nc(-c3ccc4c(c3)CC/C4=N\CO)c(-c3ccncc3)[nH]2)cc1	-0.85
312	COc1ccc(NS(=O)(=O)c2ccc(N)cc2)nn1	-0.85
313	COc1cccc2c1C(=O)c1c(O)c3c(c(O)c1C2=O)CC(O)(C(=O)CO)CC3OC1CC(N)C(O)C(C)O1	-0.83
314	COc1cccc2c1C(=O)c1c(O)c3c(c(O)c1C2=O)C[C@@](O)(C(=O)CO)C[C@@H]3O[C@H]1C[C@H](N)[C@H](O)[C@H](C)O1	-0.83
315	COc1ccc2nc([S+]([O-])Cc3ncc(C)c(OC)c3C)[nH]c2c1	-0.82
316	CN/C(=N\CCSCc1csc(NC(=N)N)n1)NC#N	-0.8
317	CCc1ccc(-n2cnc3c(sc4nccc(N(C)CCc5ccccn5)c43)c2=O)cc1	-0.8
318	COc1cc2c(c(OC)c1OC)-c1ccc(OC)c(=O)cc1C(NC(C)=O)CC2	-0.8
319	Cc1nc2n(c(=O)c1CCN1CCC(c3coc4cc(F)ccc34)CC1)CCCC2O	-0.8
320	N[C@@H](Cc1ccc(O)c(O)c1)C(=O)O	-0.8
321	N[C@H](Cc1ccccc1)C(=O)ON1CCC[C@H]1C(=O)O	-0.8
322	Nc1ccn(C2CC(CO)C(CO)O2)c(=O)n1	-0.79
323	C=C(C)C(=O)/C(=C\C(=O)O)OC	-0.79
324	CNC(=O)c1c(NCC2CCC3(CCC3)CC2)nc(C#N)nc1OCC1CCN(C(C)=O)CC1	-0.79
325	Nc1ccn([C@@H]2CC(CO)C(CO)O2)c(=O)n1	-0.79
326	Cc1c(CCOC(=O)c2cc(=O)c3c(Cl)cc(Cl)cc3[nH]2)sc[n+]1C	-0.78
327	NC(Cc1ccc(O)c(O)c1)C(=O)O	-0.77
328	CC1COc2c(N3CCN(C)CC3)c(F)cc3c(=O)c(C(=O)O)cn1c23	-0.76
329	CC(C)(C)NC(=O)C1CN(Cc2cccnc2)CCN1CC(O)CC(Cc1ccccc1)C(=O)NC1c2ccccc2CC1O	-0.74
330	CN(C)Cc1ccc(CSCCNc2[nH]cc(Cc3ccccc3)c2[N+](=O)[O-])o1	-0.73
331	CN(C)Cc1ccc(SCCNc2[nH]cc(Cc3ccccc3)c2[N+](=O)[O-])o1	-0.73
332	CN(C)Cc1ccc(CSCCNc2[nH]ccc2Cc2ccccc2)o1	-0.73
333	CCC(CO)Nc1nc(NCc2ccccc2)c2ncn(C(C)C)c2n1	-0.72
334	Cc1cn(C2CC(N=[N+]=N)C(CO)O2)c(=O)[nH]c1=O	-0.72
335	CCCC(=O)N(c1ccccc1)C1(COC)CCN(CCn2nnn(CC)c2=O)CC1	-0.71
336	S=c1nc[nH]c2nc[nH]c12	-0.71
337	C=CC1C[C@@H]2CC[C@H]1C[C@@H]2[C@@H](O)c1ccnc2ccc(OC)cc12	-0.7
338	CC1CN(C2CCC(C#N)(c3ccc(F)cc3)CC2)CCC1(C(=O)O)c1ccccc1	-0.7
339	CC1N=C(N)Nc2cccc(Cl)c21	-0.7
340	CCCCCCCCCCCCCCCCCCOCC(COP(=O)(O)OCC[N+](C)(C)C)OC	-0.7
341	CC[C@@H](C)n1ncn(-c2ccc(N3CCN(c4ccc(OC[C@@H]5CO[C@@](CSc6nncn6C)(c6ccc(Cl)cc6)O5)cc4)CC3)cc2)c1=O	-0.7
342	N#Cc1ccc(C(=O)N2CCN(c3ccc(OC4CCN(C5CCC5)CC4)cc3)C(=O)C2)cc1	-0.7
343	CN1C2CCCC1CC(NC(=O)c1nn(C)c3ccccc13)C2	-0.69
344	CNC(=O)c1c(NCC2CCC3(CCC3)CC2)nc(C#N)nc1OCC1CCNCC1	-0.67
345	Cc1nc2n(c(=O)c1CCN1CCC(c3noc4cc(F)ccc34)CC1)CC(O)CC2	-0.67
346	NC(=O)c1ncn(C2OC(CO)C(O)C2O)n1	-0.67
347	O=C(O)c1cc[nH]c1NCCSCc1ncccc1Br	-0.67
348	O=[N+]([O-])c1cc[nH]c1NCCSCc1ncccc1Br	-0.67
349	O=[N+]([O-])c1[nH]ccc1NCCSCc1ncccc1Br	-0.67
350	CCn1cc(C(=O)O)c(=O)c2ccc(C)nc21	-0.66
351	O=[N+]([O-])c1cc[nH]c1NCCSCc1ccccn1	-0.66
352	COc1cc2nc(N3CCN(C(=O)c4ccco4)CC3)nc(C)c2cc1OC	-0.66
353	Cc1ccc(NC2=NCCN2)c(Cl)c1	-0.65
354	CCC(C)n1ncn(-c2ccc(N3CCN(c4ccc(OC[C@H]5CO[C@](Cn6cncn6)(c6ccc(Cl)cc6Cl)O5)cc4)CC3)cc2)c1=O	-0.64
355	COc1ccc(CCNCCCC(C#N)(c2ccc(OC)c(OC)c2)C(C)C)cc1OC	-0.64
356	CC(=O)N1CCN(c2ccc(OCC3CO[C@@](Cn4ccnc4)(c4ccc(Cl)cc4Cl)O3)cc2)CC1	-0.63
357	CC(=O)N1CCc2ccc(N(C(=O)/C=C/c3cccc(C#N)c3)N3CCN(CCC4CCCC4)CC3)cc21	-0.63
358	NC(=O)C(c1ccccc1)(c1ccccc1)C1CCN(CCc2ccc3c(c2)CCO3)C1	-0.62
359	NC(=O)C(c1ccccc1)(c1ccccc1)[C@@H]1CCN(CCc2ccc3c(c2)CCO3)C1	-0.62
360	Cc1cn(C2CC(F)C(CO)O2)c(=O)[nH]c1=O	-0.6
361	CSC(=N)N	-0.6
362	C[C@@H]1CCCN1CCCOc1ccc(N2CCN(C(=O)c3ccc(F)cc3F)CC2=O)cc1	-0.6
363	O=S1(=O)N[C@H]2CCCN2c2ccccc21	-0.6
364	CC(C)CC1C(=O)N2CCC[C@H]2C2O[C@](NC(=O)[C@@H]3C=C4c5cccc6[nH]c(Br)c(c56)C[C@H]4N(C)C3)(C(C)C)C(=O)N12	-0.59
365	NC(=O)N1c2ccccc2CC(O)c2ccccc21	-0.59
366	C/C(=C(\CCOC(=O)c1cc(=O)c2c(Cl)cc(Cl)cc2[nH]1)SSC(C)C)N(C=O)Cc1cnc(C)nc1N	-0.57
367	CC(C)CN(CC(O)C(Cc1ccccc1)NC(=O)OC1CCOC1)S(=O)(=O)c1ccc(N)cc1	-0.56
368	CC(C)CN(C[C@@H](O)[C@H](Cc1ccccc1)NC(=O)O[C@@H]1CCOC1)S(=O)(=O)c1ccc(N)cc1	-0.56
369	CC(C)CN(C[C@@H](O)[C@H](Cc1ccccc1)NC(=O)O[C@H]1CCOC1)S(=O)(=O)c1ccc(N)cc1	-0.56
370	CN1CN(c2ccc(Br)cc2)C2(CCN(CCCC(=O)c3ccc(F)cc3)CC2)C1=O	-0.55
371	CC(=O)Nc1ccc(OC[C@@H](O)CNC(C)C)cc1	-0.55
372	CC(C)CC(CN)CC(=O)O	-0.54
373	CC1=CN2C(CC(=O)N(C)C)=C(c3ccc(C)cc3)NC2C=C1	-0.54
374	Cc1ccc(C(=O)NC2CC2)cc1-c1ccc(C(=O)NCC2CC2)cc1	-0.52
375	CC(=O)Nc1nnc(S(N)(=O)=O)s1	-0.52
376	CN1CCC[C@H]1Cc1c[nH]c2ccc(CCS(=O)(=O)c3ccccc3)cc12	-0.52
377	COc1ccc(S(=O)(=O)Nc2cc(Br)cc(F)c2Br)cc1N1CCNCC1	-0.52
378	O=NN(CCCl)C(=O)NCCCl	-0.52
379	CCCCc1c(O)n(-c2ccccc2)n(-c2ccccc2)c1=O	-0.52
380	CN(C(=O)C(c1ccccc1)c1ccccc1)C(CN1CCC(O)C1)c1ccccc1	-0.51
381	CCCCC1C(=O)N(c2ccccc2)N(c2ccccc2)C1=O	-0.5
382	C[C@]12C[C@@H](O)[C@H]3[C@@H](CCC4=CC(=O)CC[C@@]43C)[C@@H]1CC[C@@H]2C(=O)CO	-0.5
383	NC(Cc1ccc(N(CCCl)CCCl)cc1)C(=O)O	-0.5
384	CC(C=CC1=C(C)CCCC1(C)C)=CC=CC(C)=CC(=O)O	-0.49
385	Cc1cn(C2C=CC(CO)O2)c(=O)[nH]c1=O	-0.48
386	CN(C)CCCN1c2ccccc2[S+]([O-])c2ccccc21	-0.48
387	CCc1ccc(-n2cnc3c(sc4nccc(N(C)C)c43)c2=O)cc1	-0.47
388	Cn1nnc2c(C(N)=O)ncn2c1=O	-0.47
389	NC(=O)c1ccc(S(=O)(=O)C2CCN(CCc3ccc(F)cc3F)CC2)cc1	-0.47
390	CC(=O)NCCCOc1cccc(CN2CCCCC2)c1	-0.46
391	O=C(c1ccc(F)cc1)N1CCN(c2ccc(OCCCN3CCCCC3)cc2)C(=O)C1	-0.46
392	O=C(NCCN1CCN(c2cccc3c2OCC(CO)O3)CC1)c1ccc(F)cc1	-0.45
393	O=C(NCCN1CCN(c2cccc3c2OC[C@H](CO)O3)CC1)c1ccc(F)cc1	-0.45
394	O=C(O)CNC(=O)c1ccccc1O	-0.44
395	CCCN(CCC)CCc1cc(O)c2c(c1)CC(=O)N2	-0.43
396	CCN1CN(c2ccc(Br)cc2)C2(CCN(CCCC(=O)c3ccc(F)cc3)CC2)C1=O	-0.43
397	CN1CCN(c2c(F)cc3c(=O)c(C(=O)O)cn(CCF)c3c2F)CC1	-0.43
398	NC1(C(=O)O)CCCC1	-0.43
399	CC1=C(C(=O)OC(C)(C)C)C(c2cccc([N+](=O)[O-])c2)C(C(=O)OC(C)(C)C)=C(C)N1	-0.42
400	CC[C@@]1(O)C(=O)OCc2c1cc1n(c2=O)Cc2cc3c(CN(C)C)c(O)ccc3nc2-1	-0.42
401	CC[S@@]1(O)C(=O)OCc2c1cc1n(c2=O)Cc2cc3cc(CN(C)C)c(O)cc3nc2-1	-0.42
402	COc1cc2c(cc1CNC1CCCNC1c1ccccc1)N(S(C)(=O)=O)C(C)C2	-0.42
403	N[C@@]1(C(=O)O)CC(=O)[C@@H]2[C@H]1[C@@]2(F)C(=O)O	-0.41
404	C=CC#N	-0.4
405	CCCN(CCC)S(=O)(=O)c1ccc(C(=O)O)cc1	-0.4
406	NCCCS(=O)(=O)O	-0.4
407	O=C(c1ccc(Cl)cc1)N1CCN(c2ccc(OC3CCN(C4CCC4)CC3)cc2)C(=O)C1	-0.4
408	COc1cc(Nc2nn3c(NC(CO)C(C)C)cc(C4CC4)nc3c2C(N)=O)cc(OC)c1	-0.39
409	Cc1ccc2c(OCCN3CCC(Cc4ccc5c(c4)NC(=O)CO5)CC3)cccc2n1	-0.39
410	CC(C)(C)[N+](=O)C=C1C=CN([O-])C=C1	-0.38
411	CC(C)Oc1cccc(CC(=O)N2CCC[C@](CC[N+]34CCC(c5ccccc5)(CC3)CC4)(c3ccc(Cl)c(Cl)c3)C2)c1	-0.37
412	CN(C)CCC[C@@]1(c2ccc(F)cc2)OCc2cc(C#N)ccc21	-0.37
413	COc1ccc(N(c2nc(C)c(C)s2)S(C)(=O)=O)cc1CNC1CCCNC1c1ccccc1	-0.37
414	O=C(OCc1ccccc1)N1CCC(CNc2ncccn2)CC1	-0.37
415	CC(=O)C1CSc2ccccc2N1CCC1CCCCN1C	-0.36
416	CC1c2ccccc2N(C(N)=O)c2ccccc2C1C	-0.34
417	NC(=O)C1c2ccccc2C2OC2c2ccccc21	-0.34
418	NC(=O)N1c2ccccc2C2CC2c2ccccc21	-0.34
419	Cc1nc2n(c(=O)c1CCN1CCC(c3coc4cc(F)ccc34)CC1)CCCC2	-0.32
420	CC(=O)Cn1nc(-c2c(-c3ccccc3)nn3ccccc23)ccc1=O	-0.31
421	NC(=O)N1c2ccccc2C2OC2c2ccccc21	-0.3
422	CC12CCC3c4ccc(O)cc4CCC3C1CC(F)C2O	-0.3
423	CCC1(C2=CCCCC2)C(=O)NC(=O)NC1=O	-0.3
424	CC(C)c1nc(-c2ncn3c2CN(C)C(=O)c2c(Cl)cccc2-3)no1	-0.3
425	C[C@]12CC[C@@H]3c4ccc(O)cc4CC[C@H]3[C@@H]1C[C@H](F)[C@@H]2O	-0.3
426	CC1(C)SSC(C)(C)[C@@H](C(=O)O)NC(=O)C(Cc2ccccc2)NC(=O)CNC(=O)[C@@H]1NC(=O)C(N)Cc1ccc(O)cc1	-0.3
427	CC1(C)SSC(C)(C)[C@@H](NC(=O)[C@@H](N)Cc2ccc(O)cc2)C(=O)NCC(=O)N[C@@H](Cc2ccccc2)C(=O)N[C@H]1C(=O)O	-0.3
428	CC1C=Nc2c1c(=O)[nH]c(=O)n2C	-0.3
429	CCOC(=O)c1ncn2c1CN(C)C(=O)c1cc(F)ccc1-2	-0.3
430	Cn1cnc2c1c(=O)[nH]c(=O)n2C	-0.3
431	O=C(Nc1cc(Cl)ccc1O)Nc1cc(C(F)(F)F)ccc1Cl	-0.3
432	[Li]	-0.3
433	CC[C@@]1(O)C(=O)OCc2c1cc1n(c2=O)Cc2cc3ccccc3nc2-1	-0.29
434	CC[S@@]1(O)C(=O)OCc2c1cc1n(c2=O)Cc2cc3ccccc3nc2-1	-0.29
435	CC(C)NCC(O)c1ccc(NS(C)(=O)=O)cc1	-0.28
436	CC(Cl)Cl	-0.28
437	CN(C)Cc1ccnc(-c2cccc(Nc3[nH]ccc3[N+](=O)[O-])c2)c1	-0.28
438	Cc1cc(Br)cc(C)c1NC1=NCCN1	-0.28
439	N=C(N)SCCF	-0.27
440	CN(C)Cc1ccc(-c2cccc(Nc3[nH]ccc3[N+](=O)[O-])c2)o1	-0.27
441	CN(C)c1ccc(-c2cccc(Nc3[nH]ccc3[N+](=O)[O-])c2)o1	-0.27
442	C[C@@H]1NC(=O)C2(CCCC2)NC1=O	-0.26
443	CN1CN(c2ccccc2)C2(CCN(CCCC(=O)c3csc(I)c3)CC2)C1=O	-0.25
444	CN(C)C(=O)C(CCCN1CCC(O)(c2ccc(Cl)cc2)CC1)(c1ccccc1)c1ccccc1	-0.25
445	CN1Cc2c(C(=O)OC(C)(C)C)ncn2-c2ccsc2C1=O	-0.25
446	CNC(=O)c1c(NCC2CCC3(CCC3)CC2)nc(C#N)nc1OC1CC(C)(C)NC(C)(C)C1	-0.24
447	O=C(NCCCOc1cccc(CN2CCCCC2)c1)c1ccccc1	-0.24
448	O=[N+]([O-])c1nccn1CCCF	-0.24
449	C#CCO	-0.23
450	C=CCc1ccccc1OCC(O)CNC(C)C	-0.23
451	CC(C)(O)Cn1nc(-c2c(-c3ccccc3)nn3ccccc23)ccc1=O	-0.23
452	C=CCC1(CC=C)C(=O)NC(=O)NC1=O	-0.22
453	CCCN(CC1CC1)c1nc(C)nc2c1CCN2c1ccc(Cl)cc1Cl	-0.22
454	COc1cc(N)c(Cl)cc1C(=O)NC1CCNCC1OC	-0.22
455	COc1ccc(N2CCCC2=O)cc1CNC1CCCNC1c1ccccc1	-0.22
456	C[C@]12C[C@H](O)[C@H]3[C@H](CCC4=CC(=O)CC[C@@]43C)[C@@H]1CC[C@]2(O)C(=O)CO	-0.22
457	Cc1cccc(Cl)c1Nc1nc2ccc(N3CCNC(C)C3)nc2n2cncc12	-0.22
458	Nc1nc(NC2CC2)c2ncn([C@H]3C=C[C@H](CO)C3)c2n1	-0.22
459	OC(Cn1cncn1)(Cn1cncn1)c1ccc(F)cc1F	-0.22
460	C=C[C@H]1CN2CCC1C[C@@H]2[C@@H](O)c1ccnc2ccc(OC)cc12	-0.21
461	CC(C)Cc1ccc(C(C)C(=O)O)cc1	-0.2
462	Fc1cccc(F)c1N=C1NCCN1	-0.2
463	O=C(Cc1ccc(OCc2ccccc2)cc1)Nc1ccc2cnn(CCN3CCCC3)c2c1	-0.2
464	O=C(OCc1ccccc1)N1CCC(CNc2ccncn2)CC1	-0.2
465	S=C(NC1CCCCC1)N1CCC(c2cnc[nH]2)CC1	-0.2
466	CCNC(=O)C(C(N)=O)c1ccccc1	-0.19
467	NC(=O)OCC(COC(N)=O)c1ccccc1	-0.19
468	CCCC(C)(COC(N)=O)COC(=O)NC	-0.18
469	C[C@]12CC(O)[C@H]3[C@@H](CCC4=CC(=O)C=C[C@@]43C)[C@@H]1CC[C@]2(O)C(=O)CO	-0.18
470	C=CC=C	-0.17
471	CC1CCN(CC[C@H]2CCCN2S(=O)(=O)c2cccc(O)c2)CC1	-0.17
472	COC(=O)C1C(=O)C=C(Nc2cccc(OC(F)(F)F)c2)CC1C	-0.17
473	C[n+]1ccccc1/C=N/O	-0.17
474	O=[N+]([O-])c1nccn1CCCCCCCCF	-0.17
475	CCn1cc(C(=O)O)c(=O)c2cc(F)c(N3CCN(C)CC3)cc21	-0.16
476	Cn1nnc2ccc(C(c3ccc(Cl)cc3)n3cncn3)cc21	-0.16
477	NC1=NCC2c3ccccc3Cc3ccccc3N12	-0.16
478	[Kr]	-0.16
479	CCCC(=O)Nc1ccc(OCC(O)CNC(C)C)c(C(C)=O)c1	-0.15
480	COc1ccc(S(C)(=O)=O)cc1CNC1CCCNC1c1ccccc1	-0.15
481	O=c1c(-c2ccc(O)cc2)coc2cc(O)ccc12	-0.15
482	CC(=O)/C=C/c1cccs1	-0.14
483	CC(C)Nc1cccnc1N1CCNCC1	-0.14
484	CCC1(CC)C(=O)NC(=O)NC1=O	-0.14
485	CCOC(=O)c1ncn2c1CN(CCF)C(=O)c1cc(F)ccc1-2	-0.14
486	ClCCCl	-0.14
487	O=c1cc(NC2CCN(Cc3ccc4c(c3)CCO4)CC2)c2cc(Cl)ccc2o1	-0.14
488	COC(C)=O	-0.13
489	C=CCn1c2c(c3cc(C(=O)N4CCC(C)CC4)ccc31)CN(CC1CC1)CC2	-0.13
490	CC(C)(c1ccc(O)cc1)c1ccc(O)cc1	-0.12
491	O=[N+]([O-])c1c(Cc2ccccc2)c[nH]c1NCCSCc1ccccn1	-0.12
492	C=CCC1(C(C)C#CCC)C(=O)NC(=O)N(C)C1=O	-0.1
493	CC(=O)[C@H]1CC[C@H]2[C@@H]3CCC4=CC(=O)CC[C@]4(C)[C@H]3CC[C@]12C	-0.1
494	CC(F)OC(=O)c1ncn2c1CN(C)C(=O)c1cc(F)ccc1-2	-0.1
495	CN(C)Cc1ccc(-c2c[nH]c(=O)c3cccc(O)c23)cc1	-0.1
496	COCCCN1CCC(NC(=O)c2cc(Cl)c(N)c3c2OCC3)CC1	-0.1
497	CS(=O)(=O)c1ccc(C2=C(c3ccccc3)C(=O)OC2)cc1	-0.1
498	Cc1c(I)c(=O)n(-c2ccccc2)n1C	-0.1
499	Cc1nc(C)c(C)nc1C	-0.1
500	ClCC(Cl)Cl	-0.1
501	O=S(=O)(c1ccc2cc[nH]c2c1)N1CCCC1CCN1CCC(Oc2ccc(Cl)cc2)CC1	-0.1
502	OCc1ncc2n1-c1ccc(Cl)cc1C(c1ccccc1F)=NC2	-0.1
503	CC(C)(C)OC(=O)c1ncn2c1C1CCCN1C(=O)c1c(Br)cccc1-2	-0.09
504	CC(C)(C)OC(=O)c1ncn2c1[C@@H]1CCCN1C(=O)c1c(Br)cccc1-2	-0.09
505	CC(C)(C)OC(=O)c1ncn2c1C1CCCN1C(=O)c1cc(Br)ccc1-2	-0.09
506	CC1(O)NC=C2CN=C(c3ccccc3F)c3cc(Cl)ccc3N21	-0.07
507	CCC1(c2ccccc2)C(=O)NCNC1=O	-0.07
508	CC[C@]1(O)C[C@@H]2CN(CCc3c([nH]c4ccccc34)[C@@](C(=O)OC)(c3cc4c(cc3OC)N(C)[C@H]3[C@@](O)(C(=O)OC)[C@H](OC(C)=O)[C@]5(CC)C=CCN6CC[C@]43[C@@H]65)C2)C1	-0.07
509	COc1cc2c(cc1OC)[C@@H]1Cc3ccc(OC)c(OC)c3CN1CC2	-0.07
510	C=CC	-0.06
511	C=CCC1(C(C)CCCC)C(=O)NC(=O)N(C)C1=O	-0.06
512	CN1C2CCC1CC(OC(=O)C(CO)c1ccccc1)C2	-0.06
513	CN1[C@H]2CC[C@@H]1CC(OC(=O)C(CO)c1ccccc1)C2	-0.06
514	CCOc1ccccc1C(N)=O	-0.05
515	Cc1c(F)c(=O)n(-c2ccccc2)n1C	-0.05
516	Cc1cc(=O)n(-c2ccc(F)cc2)n1C	-0.05
517	O=c1c(Br)ccc2n1CC1CNCC2C1	-0.05
518	O=c1cccc2n1CC1CNC(Br)C2C1	-0.05
519	O=c1cccc2n1C[C@H]1CNC(Br)[C@@H]2C1	-0.05
520	CCNCc1ccc(C(=O)Nc2cc(C)n(Cc3cc(Cl)ccc3OCC(C)C)n2)cc1	-0.05
521	CO[C@@H]1CN(CC2Cc3ccc(C#N)cc3C2)CCC1n1c(C(C)(C)O)nc2cc(C)ccc21	-0.05
522	Cc1cccc(C)c1Nc1ncc(-c2cccc(OCCN3CCCC3)c2)n2cncc12	-0.05
523	O=C1CCC(N2C(=O)c3ccccc3C2=O)C(=O)N1	-0.05
524	Cc1cnc(N=C(N)N)s1	-0.04
525	Cc1csc(N=C(N)N)n1	-0.04
526	O	-0.04
527	Oc1ccc2c(c1)OCO2	-0.04
528	C1CCc2nnnn2CC1	-0.03
529	Cc1ncc2n1-c1ccc(Cl)cc1C(c1ccccc1F)=N[C@@H]2O	-0.03
530	O=c1[nH]c(CCCN2CCC(c3ccccc3)CC2)nc2c(Cl)cccc12	-0.03
531	CCCCO	-0.02
532	FC(F)=CCl	-0.02
533	O=C(OCc1ccccc1)N1CCC(CNc2ccccn2)CC1	-0.02
534	OCCCOc1cccc(CN2CCCCC2)c1	-0.02
535	CC(=O)N1CCN(C2CCN(C(=O)N(C)C(C)c3cc(C(F)(F)F)cc(C(F)(F)F)c3)C(c3ccc(F)cc3C)C2)CC1	-0.01
536	CCC(C)(C)C(=O)O[C@H]1C[C@@H](C)C=C2C=C[C@H](C)[C@H](CC[C@@H]3C[C@@H](O)CC(=O)O3)[C@H]21	-0.01
537	CCCC(C)=O	-0.01
538	CCCN1CN(c2ccc(Br)cc2)C2(CCN(CCCC(=O)c3ccc(F)cc3)CC2)C1=O	-0.01
539	CCNc1cccnc1N1CCN(C(=O)c2cc3cc(OC)ccc3[nH]2)CC1	-0.01
540	O=[N+]([O-])c1nccn1CC(O)CF	-0.01
541	O=[N+]([O-])c1nccn1CC(O)COCF	-0.01
542	c1ccc2c(c1)CCC(CNCCCNC1=NCCCN1)O2	-0.01
543	Cc1nnc2n1-c1ccc(Cl)cc1C(c1ccccc1)=NC2	0
544	C	0
545	C=CCC(N)c1ccccc1-c1noc2ccccc12	0
546	CC12CCC(=O)C=C1CCC1C2CCC2(C)C(O)CCC12	0
547	CCCCCc1cc(O)c2c(c1)OC(C)(C)[C@@H]1CCC(C)=C[C@@H]21	0
548	CCOC(C)=O	0
549	CN1CCC23CCCCC2C1Cc1ccc(O)cc13	0
550	CN1CC[C@]23CCCC[C@H]2[C@H]1Cc1ccc(O)cc13	0
551	COC(=O)[C@@H]1C(=O)C=C(Nc2ccc(Cl)cc2)C[C@@H]1C	0
552	Cc1c(N(C)C)c(=O)n(-c2ccccc2)n1C	0
553	Cc1ccnc2c1NC(=O)c1cccnc1N2C1CC1	0
554	NC(=O)C1c2ccccc2C=Cc2ccccc21	0
555	C1CO1	0.01
556	CCCCCCCC1(CC)C(=O)NC(=O)NC1=O	0.02
557	CO	0.02
558	N#N	0.03
559	[Ar]	0.03
560	[N-]=[N+]=O	0.03
561	NN	0.03
562	CC(C)CCO	0.04
563	CCC(C)CO	0.04
564	CCC(O)(CC(N)=O)c1ccccc1	0.04
565	Cl/C=C/Cl	0.04
566	CCC1(CCC(C)C)CNC(=O)NC1=O	0.04
567	CC(C)(C)/[N+]([O-])=C\c1ccccc1	0.05
568	CC(C)(C)[N+]([O-])=Cc1ccccc1	0.05
569	CCN(CC)CCOC(=O)c1ccc(N)cc1	0.05
570	CN1CCC(n2nc(-c3c(-c4ccccc4)nn4ccccc34)ccc2=O)CC1	0.06
571	CN1C(=O)NC2=NCN(C)C2C1=O	0.06
572	CN1C(=O)NC2N=CN(C)C2C1=O	0.06
573	CCC(C)(C)O	0.07
574	O=C(CCCN1CCC2(CC1)C(=O)NCN2c1ccc(Br)cc1)c1ccc(F)cc1	0.07
575	CNC(=O)c1c(NCC2CCC3(CCC3)CC2)nc(C#N)nc1OCC1CCN(C(C)C)CC1	0.08
576	CNC(=O)Oc1ccc2c(c1)C1(C)CCN(C)C1N2C	0.08
577	CCOc1cc(OCCCCOc2ccc(C(=O)CC(C)C)c(O)c2)ccc1CCC(=O)O	0.08
578	COCCOC(=O)C1=C(C)NC(C)=C(C(=O)OC(C)C)C1c1cccc([N+](=O)[O-])c1	0.08
579	FCC(Cl)(Cl)Cl	0.08
580	CCCC1(CC)C(=O)NC(=O)NC1=O	0.09
581	CCCCCC1(CC)C(=O)NC(=O)NC1=O	0.09
582	CCN(CC)CCCC(=O)c1cc(Cl)c(N)cc1OC	0.09
583	COc1ccccc1N1CCN(CCN(C(=O)c2ccc(F)cc2)c2ccccn2)CC1	0.09
584	CN1C(=O)CN=C(c2ccccc2F)c2cc([N+](=O)[O-])ccc21	0.1
585	Cn1c(=O)[nH]c2ncn(C)c2c1=O	0.1
586	CNC(=O)Oc1ccc2c(c1)[C@]1(C)CCN(C)[C@@H]1N2C	0.1
587	O=C(O)c1cc(O)ccc1O	0.1
588	CN(C/C=C/C#CC(C)(C)C)Cc1cccc2ccccc12	0.1
589	C=CC1CC2CCC1CC2C(O)c1ccnc2ccc(OC)cc12	0.1
590	C=COCC(F)(F)F	0.1
591	CN1CC(C)(C2=CCCCC2)C(=O)NC1=O	0.1
592	COc1ccc2cc([C@H](C)C(=O)O)ccc2c1	0.1
593	c1cc(CN2CCCCC2)cc(OCCCNc2nc3ccccc3s2)c1	0.1
594	CC(C)(C)O	0.11
595	COc1ccc(-n2nc(C)cc2C)cc1CNC1CCCNC1c1ccccc1	0.11
596	COc1ccc2c3c1O[C@H]1C(=O)CC[C@@]4(O)[C@@H](C2)N(C)CC[C@]314	0.11
597	C[n+]1c2n(c(=O)c3ccccc31)CCC1c3ccccc3NC21	0.11
598	Cc1ccc2c(OCCN3CCC(Cc4ccc5c(c4)N(C)C(=O)CO5)CC3)cccc2n1	0.11
599	Clc1cccc(Cl)c1NC1N=CCN1	0.11
600	FC(F)OC(F)C(F)(F)F	0.11
601	NCCn1ncc2cc(Cl)c(Cl)cc21	0.11
602	CCCOC(C)=O	0.12
603	C=COCCCCOC=C	0.12
604	F/C=C/O/C=C/F	0.13
605	O=C(OCc1ccccc1)N1CCC(CNc2ccncc2)CC1	0.13
606	O=c1cc(NC2CCN(C/C=C/c3ccccc3)CC2)c2cc(Cl)ccc2o1	0.13
607	CCN(CC)CCNC(=O)c1ccc(N)c(Cl)c1	0.14
608	CNCc1ccc(NC(=O)c2cc(C)n(Cc3cc(Cl)ccc3OCc3ccccc3)n2)cc1	0.15
609	Cc1ccc(C)c(C)c1	0.16
610	Clc1ccc(NC2=NCCN2)c(Cl)c1	0.16
611	O=C1CCCN1CCCCN1CCN(c2cc(C(F)(F)F)ccn2)CC1	0.16
612	CCC(C)(C)OC	0.17
613	FC(F)(F)c1ccc(Cl)cc1	0.17
614	Cc1cc(-c2ccccc2)nnc1N1CCN(c2ncccn2)CC1	0.18
615	CCOc1ccc(-c2nn3ncccc3c2-c2ccc(S(C)(=O)=O)cc2)cc1	0.18
616	O=C1c2ccccc2S(=O)(=O)N1CCCCN[C@H]1CCc2ccccc2O1	0.18
617	CCCCC1(CC)C(=O)NC(=O)NC1=O	0.19
618	CN1CCCCC1CCN1c2ccccc2Sc2ccc(S(C)(=O)=O)cc21	0.2
619	C=CCC1(C(C)CCC)C(=O)NC(=O)NC1=O	0.2
620	C=CCC1([C@H](C)CCC)C(=O)NC(=O)NC1=O	0.2
621	CCCCCO	0.2
622	CN(C)Cc1ccccc1Sc1ccc(F)cc1N	0.2
623	COc1ccc2c3c1OC1CC(O)C=C(CN(C)C2)C31	0.2
624	Clc1ccc(Nc2nnc(Cc3ccncc3)c3ccccc23)cc1	0.2
625	FC(F)OC(F)(F)[C@H](F)Cl	0.2
626	[Ne]	0.2
627	CCOC(C)(C)C	0.22
628	CNCCCC1(c2ccccc2)SC(C)(C)c2ccccc21	0.22
629	COc1ccc2c(c1)[C@@]13CCCC[C@@H]1[C@@H](C2)N(C)CC3	0.22
630	c1cc(CN2CCCCC2)cc(OCCCNc2nc3ccccc3o2)c1	0.22
631	CN1C2CC(OC(=O)C(CO)c3ccccc3)CC1C1OC12	0.23
632	CN1C2CC(OC(=O)[C@@H](CO)c3ccccc3)CC1C1OC12	0.23
633	Cc1cccc(C)c1Nc1ncc(-c2ccc(OCCN3CCCC3)cc2)n2cncc12	0.23
634	c1cc2ccc3cccc4ccc(c1)c2c34	0.23
635	CCCCCCCCC1(CC)C(=O)NC(=O)NC1=O	0.24
636	COc1ccc(-n2nnnc2C(F)(F)F)cc1CNC1CCCNC1c1ccccc1	0.24
637	CCCN(CCC)CCc1ccc2c(c1)CC(=O)N2	0.25
638	O=C(CCCN1CCC2(CC1)C(=O)NCN2c1ccccc1)c1ccc(F)cc1	0.26
639	CCCN1CCOC2c3cc(O)ccc3CCC21	0.26
640	FC(Br)C(F)(F)F	0.27
641	CCOC(=O)Cc1cc2c(c(N)n1)N=C(c1ccccc1)C(C)N2	0.27
642	CCOC(=O)c1ccc(N)cc1	0.27
643	FC(Br)CC(F)(F)F	0.27
644	CCCCOC(C)=O	0.28
645	CC(C)=CCN1Cc2cc(Cl)cc3[nH]c(=S)n(c23)CC1C	0.28
646	CC1=C(CC2CCc3c(c4ccccc4n3C)C2=O)CC=N1	0.28
647	Cl/C(=C\n1cncn1)c1ccc(Cl)cc1Cl	0.28
648	CC(C)(C)c1nc(N2CCN(CCCSc3nccc(=O)[nH]3)CC2)cc(C(F)(F)F)n1	0.3
649	CCC(NC(=O)c1c(C)c(-c2ccccc2)nc2ccccc12)c1ccccc1	0.3
650	CCCN1CC(CSC)CC2c3cccc4[nH]cc(c34)CC21	0.3
651	CCCN1C[C@H](CSC)C[C@@H]2c3cccc4[nH]cc(c34)C[C@H]21	0.3
652	CC[C@H](NC(=O)c1c(C)c(-c2ccccc2)nc2ccccc12)c1ccccc1	0.3
653	Cc1cc(-c2ccccc2)nnc1NCCN1CCOCC1	0.3
654	Cc1cc(NC(=O)c2ccc(CN3CCCC3)cc2)nn1Cc1cc(Cl)ccc1OCC(C)C	0.3
655	Cc1cn(-c2cccc(Nc3ncnc4c3CCc3ccccc3-4)c2)cn1	0.3
656	FCOC(C(F)(F)F)C(F)(F)F	0.3
657	Nc1nc2ccc(OC(F)(F)F)cc2s1	0.3
658	C=C	0.3
659	CCCCN1CC2Cc3cc(OC)c(OC)cc3C2C1	0.31
660	COc1ccc2c3c1OC1CC(O)C=CC31CCN(C)C2	0.32
661	COc1ccc2c3c1O[C@H]1C[C@@H](O)C=C[C@@]31CCN(C)C2	0.32
662	Cc1nc2cc(CNC3CCCNC3c3ccccc3)c(OC(C)C)cc2s1	0.32
663	c1cncc(C2CCCN2)c1	0.32
664	COc1ccc2c3c1O[C@H]1C(=O)CC[C@H]4[C@@H](C2)N(C)CC[C@]314	0.32
665	Cc1cnn(C2CCN(c3nc4ccccc4n3Cc3ccc(F)cc3)CC2)c1	0.32
666	OC1CNCc2ccccc21	0.32
667	c1cncc([C@@H]2CCCN2)c1	0.32
668	Brc1cccc(Br)c1NC1=NCCN1	0.33
669	ClCC(Cl)(Cl)Cl	0.33
670	CCN(CC)CC(=O)Nc1c(C)cccc1C	0.34
671	FC(F)(F)CC(Cl)Br	0.35
672	FC(F)(F)CCC(Cl)Br	0.35
673	CCCCCCC1(CC)C(=O)NC(=O)NC1=O	0.36
674	CCOC(=O)Nc1cc2c(c(N)n1)N=C(CN(C)c1ccc(OC)cc1)CN2	0.36
675	COC(C)(C)C	0.36
676	COc1ccc(-c2nccs2)cc1CNC1CCCNC1c1ccccc1	0.36
677	Cc1ccc(Cn2c([C@H]3CNCCO3)nc3ccccc32)cc1	0.36
678	Cc1nc2c(c(-n3ccc(C(F)(F)F)n3)n1)CCN2c1ccc(Cl)cc1Cl	0.36
679	O=c1[nH]c(C2=CC(N3CCC(c4ccccc4)CC3)CC2)nc2c(Cl)cccc12	0.36
680	CNC(=O)c1c(NCC2CCC3(CCC3)CC2)nc(C#N)nc1OCC1CCN(C)CC1	0.37
681	COc1ccccc1CNC1C2CCN(CC2)C1C(c1ccccc1)c1ccccc1	0.37
682	ClC(Cl)=C(Cl)Cl	0.37
683	CC(C)(C)NCC(O)COc1ccccc1C#N	0.38
684	Clc1ccc(Cl)c(N=C2NCCN2)c1	0.38
685	O=c1ccc(-c2c(-c3ccccc3)nn3ccccc23)nn1CCN1CCCCC1	0.38
686	CC(C)NCC(O)COc1ccc(CCOCC2CC2)cc1	0.39
687	COc1cc2c(c(CNC3CCCNC3c3ccccc3)c1)OCC2	0.39
688	Clc1ccc2c(c1)C1CNCC1c1ccccc1O2	0.39
689	Clc1ccc2c(c1)C1CCNCC1c1ccccc1O2	0.39
690	Fc1ccc(Cn2c([C@@H]3CCCNC3)nc3ccccc32)cc1	0.39
691	FS(F)(F)(F)(F)F	0.4
692	Cc1ccccc1C	0.4
693	CC(=O)OC(C)C	0.4
694	C#CC1(O)CCC2C3C(C)CC4=C(CCC(=O)C4)C3CCC21	0.4
695	C#CC1(O)CCC2C3C(C)CC4=C(CCC(=O)C4)C3CCC21C	0.4
696	C#C[C@]1(O)CC[C@H]2[C@H]3[C@H](CC[C@@]21C)C1=C(CC(=O)CC1)C[C@H]3C	0.4
697	CCCCCOC(C)=O	0.4
698	CC(C)Oc1ccc(OC(F)(F)F)cc1CNC1CCCNC1c1ccccc1	0.41
699	C[C@H]1CN(c2c(F)c(N)c3c(=O)c(C(=O)O)cn(C4CC4)c3c2F)C[C@@H](C)N1	0.41
700	Clc1cc(Br)cc(Cl)c1NC1=NCCN1	0.41
701	CCCCOC(=O)c1ccc(N)cc1	0.42
702	COc1ccc(C=C2CCCN=C2c2cccnc2)c(OC)c1	0.42
703	CC(C)(C)c1ccccc1	0.43
704	CN(C)c1ccnc2sc3c(=O)n(N4CCCCCC4)cnc3c12	0.43
705	CN1CCC[C@@H](c2nc3ccccc3n2Cc2ccc(F)cc2)C1	0.43
706	O=C(Nc1ccc(Cl)nc1)c1ccc(F)c(F)c1	0.44
707	c1cc(CN2CCCCC2)cc(OCCCNc2nccs2)c1	0.44
708	CC(=O)OCC(C)C	0.45
709	C=Cc1ccccc1	0.45
710	CCC(=O)OC(Cc1ccccc1)(c1ccccc1)[C@H](C)CN(C)C	0.46
711	CN1CN(c2ccccc2)C2(CCN(CCCC(=O)c3ccc(F)cc3)CC2)C1=O	0.46
712	COc1ccc(C(C)(C)C)cc1CNC1C2CCN(CC2)C1C(c1ccccc1)c1ccccc1	0.46
713	Clc1cc(Cl)c(NC2=NCCN2)c(Cl)c1	0.47
714	CCC(C)N(C)C(=O)c1cc2ccccc2c(-c2ccccc2Cl)n1	0.48
715	COc1cc2sc(C)nc2cc1CNC1CCCNC1c1ccccc1	0.48
716	COc1ccc(C(C)C)cc1CNC1C2CCN(CC2)C1C(c1ccccc1)c1ccccc1	0.48
717	CCN(CC)Cc1ccc2c(c1)CCC(N1CCN(CCc3ccc(F)cc3)CC1=O)C2	0.48
718	O=S(=O)(c1cccc(Cl)c1)n1ccc2c(N3CCNCC3)c(Cl)ccc21	0.48
719	c1ccc2c(c1)[nH]c1cnccc12	0.48
720	CCc1nc(N)nc(N)c1-c1ccc(Cl)cc1	0.49
721	COc1cc2oc(C)nc2cc1CNC1CCCNC1c1ccccc1	0.49
722	CN1CCN2c3ncccc3Cc3ccccc3C2C1	0.5
723	COc1ccc(CN(CCN(C)C)c2ccccn2)cc1	0.5
724	O=C1CN=C(c2ccccc2)c2c(Cl)cccc2N1	0.5
725	CCCCCCCCC	0.52
726	Cc1cccc2c1Oc1ccccc1C1(O)CCNCC21	0.52
727	Fc1ccc([C@@H]2CCNCC2COc2ccc3c(c2)OCO3)cc1	0.52
728	CNCCCN1c2ccccc2CCc2cc(O)ccc21	0.53
729	CCCOC(=O)c1ccc(N)cc1	0.55
730	CN(C)c1ccccc1Sc1ccc(CCF)cc1N	0.55
731	CC(=O)OCCC(C)C	0.55
732	COc1ccc2c3c1O[C@H]1[C@@H](O)CC[C@H]4[C@@H](C2)N(C)CC[C@]314	0.55
733	CC(C)Br	0.56
734	N#Cc1ccc2c(c1)CCN(CCC1CCC(NC(=O)c3ccnc4ccccc34)CC1)C2	0.56
735	c1ccc2c(c1)CCNC2	0.56
736	C#CCN(C)[C@H](C)Cc1ccccc1	0.57
737	COc1ccc2[nH]nc(NC3CCN(Cc4ccc5c(c4)OCO5)CC3)c2c1	0.57
738	Cc1ccn(CCCCN2CCN(c3cc(C(F)(F)F)nc(C(C)(C)C)n3)CC2)c(=O)c1	0.57
739	Cc1nnc2n1C1CCC(Cl)CC1C(c1ccccc1Cl)=NC2	0.57
740	OC(CNCC(O)C1CCc2cc(F)ccc2O1)C1CCc2cc(F)ccc2O1	0.57
741	Brc1cc(Br)c(NC2=NCCN2)c(Br)c1	0.58
742	CC(CF)NC[C@H](O)COc1cccc2[nH]c3ccccc3c12	0.58
743	O=C1Nc2ccc(Cl)cc2C(c2ccccc2)=NC1O	0.6
744	CNCCCN1c2ccccc2Sc2ccccc21	0.6
745	COC(=O)C1C(OC(=O)c2ccccc2)CC2CCC1N2C	0.6
746	CC1NC(=NCC(F)F)Nc2cccc(Cl)c21	0.6
747	CCC12CCN(CC3(O)CC3)C(Cc3ccc(O)cc31)C2(C)C	0.6
748	CCCCC1CCN(CCCN2C(=O)CCc3ccccc32)CC1	0.6
749	COC(=O)[C@@H]1C2CCC(C[C@@H]1OC(=O)c1ccccc1)N2C	0.6
750	Clc1ccc2c(c1)C(N1CCNCC1)=Nc1ccccc1O2	0.6
751	S=C=S	0.6
752	c1cnc(N2CCNCC2)nc1	0.6
753	CC(C)(C)C1CCCCC1	0.61
754	CC1=NC(O)C(=O)Nc2ccc(Cl)cc21	0.61
755	COc1ccc(C2CNC(=O)C2)cc1OC1CCCC1	0.61
756	COc1cc2sc(C3CC3)nc2cc1CNC1CCCNC1c1ccccc1	0.62
757	COc1ccc(C(CN(C)C)C2(O)CCCCC2)cc1	0.62
758	COc1ccc(OC(F)(F)F)cc1CNC1CCCNC1c1ccccc1	0.63
759	OC(c1cc(C(F)(F)F)nc2c(C(F)(F)F)cccc12)C1CCCCN1	0.63
760	CCC(C)Nc1ccc(I)c(NC(C)CC)c1	0.64
761	CN(C)CCOC(C)(c1ccccc1)c1ccccn1	0.64
762	CN(C)CCO[C@@](C)(c1ccccc1)c1ccccn1	0.64
763	Clc1ccc(N2CCN(Cc3cnn4ccccc34)CC2)cc1	0.64
764	CCc1nc(N)nc(N)c1-c1ccc(Cl)c(Cl)c1	0.65
765	CCCCCCCCCC	0.67
766	CCCCCCCC	0.69
767	c1ccc(NCCCOc2cccc(CN3CCCCC3)c2)nc1	0.69
768	c1ccc2c(c1)CCCN2	0.7
769	OCCN1CCN(CCCN2c3ccccc3Sc3ccc(Cl)cc32)CC1	0.7
770	OCCOCCN1CCN(C2=Nc3ccccc3Sc3ccccc32)CC1	0.7
771	C=CCCCCCC	0.74
772	COc1cccc(CC2CCN(C3CCC(OC)(c4ccc5c(c4)OCO5)CC3)CC2)c1	0.74
773	Cc1ncc2n1-c1ccc(Cl)cc1C(c1ccccc1Cl)=NC2	0.74
774	CSc1ccc2c(c1)N(CCC1CCCNC1)c1ccccc1S2	0.75
775	Fc1ccc(Cn2c([C@H]3CNCCO3)nc3ccccc32)cc1	0.77
776	Cc1cc2c(s1)=Nc1ccccc1NC=2N1CCN(C)CC1	0.78
777	CN(c1nc2ccccc2s1)C1CCN(CC(O)COc2ccc(F)cc2)CC1	0.78
778	COc1cc(-n2cnc3cc(-c4ccc(Cl)cc4)sc3c2=O)ccc1OCCN1CCCC1	0.78
779	COCCCC/C(=N/OCCN)c1ccc(C(F)(F)F)cc1	0.79
780	COCCCC/C(=N\OCCN)c1ccc(C(F)(F)F)cc1	0.79
781	COCCCCC(=NOCCN)c1ccc(C(F)(F)F)cc1	0.79
782	CSc1ccc2c(c1)N(CCC1CCCCN1)c1ccccc1S2	0.8
783	CN1CCN(C2=Nc3ccccc3Oc3ccc(Cl)cc32)CC1	0.8
784	CCc1ccc(-c2ccc(C(=O)N(C)C3CCN(C(=O)N4CCC(N5CCCCC5)C4)C3)cc2)cc1	0.81
785	Cc1nc(N)nc(N)c1-c1ccc(Cl)c(Cl)c1	0.81
786	N[C@H]1C[C@@H]1c1ccc(F)cc1	0.81
787	Cc1cccc2c1Oc1ccccc1C1(O)CCN(C)CC21	0.82
788	Cc1cccc2c1Oc1ccccc1[C@@]1(O)CCN(C)C[C@@H]21	0.82
789	CCCC(=O)c1ccc2c(c1)N(CCCN1CCN(C)CC1)c1ccccc1S2	0.83
790	CC1CCN(CCCC(=O)c2ccc(F)cc2)CC1	0.83
791	Clc1ccc2[nH]nc(NC3CCN(Cc4ccc5c(c4)OCO5)CC3)c2c1	0.83
792	CCOC(=O)C1(c2ccccc2)CCN(C)CC1	0.85
793	OC(CCN1CCCCC1)(c1ccccc1)C1CC2C=CC1C2	0.85
794	COc1cc2sc(C(C)(C)C)nc2cc1CNC1CCCNC1c1ccccc1	0.85
795	C=CCCCCCCC	0.86
796	CCCCC(C)C	0.86
797	COc1ccccc1CNC1CCCNC1c1ccccc1	0.87
798	CCN(C)C(=O)Oc1cccc(C(C)N(C)C)c1	0.88
799	CCN(C)C(=O)Oc1cccc([C@H](C)N(C)C)c1	0.88
800	FC(F)Oc1ccc(OC(F)(F)F)cc1CNC1CCCNC1c1ccccc1	0.88
801	Fc1ccc(Cn2c([C@H]3CNCCS3)nc3ccccc32)cc1	0.89
802	CCCC(C)CC	0.9
803	C=C([CH]CC)CC	0.9
804	CC1CCCC1	0.9
805	CCN(CC)CCNC(=O)c1cc(Cl)c(N)cc1OC	0.9
806	CC(C)(C)c1cc(CN2CCN(CC(O)c3ccc(Cl)cc3)CC2)cc(C(C)(C)C)c1O	0.91
807	CC/C(=C(/c1ccccc1)c1ccc(OCCN(C)C)cc1)c1ccccc1	0.92
808	CCC(=C(c1ccccc1)c1ccc(OCCN(C)C)cc1)c1ccccc1	0.92
809	COc1ccc(C(C)C)cc1CNC1CCCNC1c1ccccc1	0.92
810	CC(N)Cc1ccccc1	0.93
811	CN[C@@H](C)Cc1ccccc1	0.96
812	C=CCCCCCCCC	0.96
813	CC(C)(C)c1ccc(OC(F)(F)F)c(CNC2CCCNC2c2ccccc2)c1	0.96
814	CC1CCCCC1	0.96
815	NCCCN1c2ccccc2Sc2ccc(Cl)cc21	0.97
816	COc1ccc(C(C)(C)C)cc1CNC1CCCNC1c1ccccc1	0.98
817	Ic1ccc(CN2CCCCC2)cc1CN1CCCCC1	0.98
818	CC(CN(C)C)CN1c2ccccc2CCc2ccccc21	0.99
819	CN1CCN2c3ccccc3Cc3ccccc3C2C1	0.99
820	CCCC(C)C	1
821	CC(C)(C)OC(=O)CCCc1ccc(N(CCCl)CCCl)cc1	1
822	CCC(C)(C)C	1
823	CCC(C)CC	1
824	CN(C)CC/C=C1\c2ccccc2COc2ccccc21	1
825	CN(C)CCC=C1c2ccccc2COc2ccccc21	1
826	CN1CCC2(C)c3cc(OC(=O)Nc4ccccc4)ccc3N(C)C12	1
827	N#Cc1ccc(S(=O)(=O)C2CCN(CCc3ccc(F)cc3F)CC2)cc1	1
828	CCCCCCN1CCN(c2ccc(I)cc2)CC1	1.01
829	CC1CCC(C)C(C)C1	1.02
830	CN1CC2c3ccccc3Oc3ccc(Cl)cc3C2C1	1.03
831	CN1CCC2(O)c3ccccc3Oc3ccc(Cl)cc3C2C1	1.03
832	CNCCC=C1c2ccccc2CCc2ccccc21	1.04
833	COc1ccc(Cl)cc1[C@]1(F)C(=O)Nc2cc(C(F)(F)F)ccc21	1.04
834	CCCCCCCC(C)C	1.05
835	CN(C)CCC=C1c2ccccc2C=Cc2ccccc21	1.06
836	CC1CCCCC1C	1.07
837	CCc1ccc(C(=O)C(C)CN2CCCC2)cc1	1.08
838	CNC(C)CC1CCCCC1	1.08
839	CN[C@H](C)CC1CCCCC1	1.08
840	COc1ccc(CCN2CCC(Nc3nc4ccccc4n3Cc3ccc(F)cc3)CC2)cc1	1.1
841	CC12NC(Cc3ccccc31)c1ccccc12	1.11
842	N#Cc1ccc(OCC2CCN(C/C=C/I)CC2)cc1	1.13
843	N#Cc1ccc(OCC2CCN(CC=CI)CC2)cc1	1.13
844	O=C(CCC1CCN(Cc2ccccc2)CC1)c1ccc2c(c1)NCCCC2	1.14
845	COCCc1ccc(OCC(O)CNC(C)C)cc1	1.15
846	CCc1cccc(N=C(C)Nc2cccc(CC)c2)c1	1.2
847	COc1cc2sc(-c3ccccc3)nc2cc1CNC1CCCNC1c1ccccc1	1.26
848	O=C(CCCN1CCC(O)(c2ccc(Cl)cc2)CC1)c1ccc(F)cc1	1.3
849	CC(CN1c2ccccc2Sc2ccccc21)N(C)C	1.3
850	CNCCCC12CCC(c3ccccc31)c1ccccc12	1.3
851	CNCCCN1c2ccccc2Sc2cccc(Cl)c21	1.37
852	CC(C)CN1CCN(c2ccc(I)cc2)CC1	1.38
853	CCC(C)N1CCN(c2ccc(I)cc2)CC1	1.38
854	O=C(CCCN1CCC(O)(c2ccc(Br)cc2)CC1)c1ccc(F)cc1	1.38
855	O=C(CCN1CCC(O)(c2ccc(Br)cc2)CC1)c1ccc(F)cc1	1.38
856	CN1CCN(CCCN2c3ccccc3Sc3ccc(C(F)(F)F)cc32)CC1	1.4
857	CC(NC(C)(C)C)C(=O)c1cccc(Cl)c1	1.4
858	CC1CCN(CCCN2c3ccccc3Sc3ccc(C(F)(F)F)cc32)CC1	1.44
859	CN(C)CCCN1c2ccccc2Sc2ccc(C(F)(F)F)cc21	1.44
860	CN1CCN(CCCN2c3ccccc3Sc3cccc(C(F)(F)F)c32)CC1	1.44
861	OCCN1CCN(CCCN2c3ccccc3Sc3ccc(C(F)(F)F)cc32)CC1	1.5
862	CNC1CCC(c2ccc(Cl)c(Cl)c2)c2ccccc21	1.6
863	FC(F)(F)c1ccc(N2CCNCC2)nc1Cl	1.64
864	COc1cc([C@@H]2c3cc4c(cc3[C@@H](O[C@@H]3O[C@@H]5CO[C@@H](C)O[C@H]5[C@H](O)[C@H]3O)[C@H]3COC(=O)[C@H]23)OCO4)cc(OC)c1O	-1.5
865	CC(=O)N1CCN(c2ccc(OC[C@H]3CO[C@](Cn4ccnc4)(c4ccc(Cl)cc4Cl)O3)cc2)CC1	-0.28
866	CC(C)(C)/[N+]([O-])=C/c1ccccc1	0
867	OC[C@@H](O)[C@@H](O)[C@H](O)[C@H](O)CO	-1.6
868	CN=C(NC#N)Nc1cccc(-c2csc(N=C(N)N)n2)c1	-1.54
869	CCc1cccc2c3c([nH]c12)C(CC)(CC(=O)O)OCC3	-1.42
870	CN=C(NC#N)NCCSCc1nc[nH]c1C	-1.4
871	O=c1[nH]cnc2c1ncn2C1CCC(CO)O1	-1.3
872	CC1OC(OC2C(O)CC(OC3C(O)CC(OC4CCC5(C)C(CCC6C5CC(O)C5(C)C(C7=CC(=O)OC7)CCC65O)C4)OC3C)OC2C)CC(O)C1O	-1.2
873	Nc1ccn(C2CCC(CO)O2)c(=O)n1	-1.2
874	Nc1ccn([C@H]2CC[C@@H](CO)O2)c(=O)n1	-1.2
875	CN(C)Cc1ccc(CSCCNc2[nH]ccc2[N+](=O)[O-])o1	-1.12
876	O=C(O)c1ccccc1O	-1.1
877	CCn1cc(C(=O)O)c(=O)c2cc(F)c(N3CCNCC3)cc21	-1.1
878	CC(C)(C)NC(=O)C1CC2CCCCC2CN1CC(O)C(Cc1ccccc1)NC(=O)C(CC(N)=O)NC(=O)c1ccc2ccccc2n1	-1.03
879	CCC1(O)CC2CN(CCc3c([nH]c4ccccc34)C(C(=O)OC)(c3cc4c(cc3OC)N(C=O)C3C(O)(C(=O)OC)C(OC(C)=O)C5(CC)C=CCN6CCC43C65)C2)C1	-1.03
880	CC(C)(C(=O)O)c1ccc(C(O)CCCN2CCC(C(O)(c3ccccc3)c3ccccc3)CC2)cc1	-1
881	CC(C)(C)NC(=O)[C@@H]1C[C@@H]2CCCC[C@@H]2CN1C[C@@H](O)[C@H](Cc1ccccc1)NC(=O)[C@H](CC(N)=O)NC(=O)c1ccc2ccccc2n1	-0.95
882	CC(C)NCC(O)COc1ccc(CC(N)=O)cc1	-0.9
883	Cc1cn([C@H]2C[C@H](F)[C@@H](CO)O2)c(=O)[nH]c1=O	-0.85
884	O=c1[nH]c2ccccc2n1CCCN1CCC(n2c(=O)[nH]c3cc(Cl)ccc32)CC1	-0.8
885	Nc1nc(=O)c2ncn(COCCO)c2[nH]1	-0.8
886	Cc1cn(C2CC(N=[N+]=[N-])C(CO)O2)c(=O)[nH]c1=O	-0.72
887	Cc1cn([C@H]2C[C@H](N=[N+]=[N-])[C@@H](CO)O2)c(=O)[nH]c1=O	-0.7
888	COc1ccc(CCN(C)CCCC(C#N)(c2ccc(OC)c(OC)c2)C(C)C)cc1OC	-0.7
889	Cc1nc2n(c(=O)c1CCN1CCC(c3noc4cc(F)ccc34)CC1)CCCC2O	-0.7
890	CC(=O)Oc1ccccc1C(=O)O	-0.5
891	Cc1ccc(-c2nc3ccc(C)cn3c2CC(=O)N(C)C)cc1	-0.48
892	CNS(=O)(=O)CCc1ccc2[nH]cc(C3CCN(C)CC3)c2c1	-0.46
893	CCCN(CCC)CCc1ccc(O)c2c1CC(=O)N2	-0.43
894	CNS(=O)(=O)Cc1ccc2[nH]cc(CCN(C)C)c2c1	-0.4
895	CC(C)(C)NCC(O)COc1cccc2c1CCC(=O)N2	-0.4
896	CN1CCCCC1CCN1c2ccccc2Sc2ccc([S+](C)[O-])cc21	-0.4
897	CC(C)(C)/[N+]([O-])=C\c1cc[n+]([O-])cc1	-0.38
898	CC(=O)Nc1ccc(O)cc1	-0.3
899	CNCCc1ccccn1	-0.3
900	Cn1c(=O)c2[nH]cnc2n(C)c1=O	-0.3
901	ClCCl	-0.3
902	CN1CC[C@]23c4c5ccc(O)c4O[C@H]2[C@@H](O)C=C[C@H]3[C@H]1C5	-0.3
903	CCC1(C)CC(=O)NC1=O	-0.3
904	Cc1ncc2n1-c1ccc(Cl)cc1C(c1ccccc1F)=NC2O	-0.3
905	CCOC(=O)N1CCC(=C2c3ccc(Cl)cc3CCc3cccnc32)CC1	-0.3
906	CC1NC(=O)C2(CCCC2)NC1=O	-0.26
907	CCCC(CCC)C(=O)O	-0.2
908	CN1CCC23c4c5ccc(O)c4OC2C(O)C=CC3C1C5	-0.2
909	C=CC1CN2CCC1CC2C(O)c1ccnc2ccc(OC)cc12	-0.2
910	CCC1(C)C(=O)NC(=O)NC1=O	-0.2
911	Cn1ncnc1COc1nn2c(-c3cc(F)ccc3F)nnc2cc1C(C)(C)C	-0.2
912	O=c1n(CCCN2CCN(c3cccc(Cl)c3)CC2)nc2ccccn12	-0.2
913	CCO	-0.2
914	NCC1(CC(=O)O)CCCCC1	-0.19
915	CC(C)CO	-0.17
916	CCCO	-0.16
917	C[C@@H]1C[C@H]2[C@@H]3CCC4=CC(=O)C=C[C@]4(C)[C@@]3(F)[C@@H](O)C[C@]2(C)[C@@]1(O)C(=O)CO	-0.15
918	CCCC(C)(COC(N)=O)COC(N)=O	-0.15
919	CC(C)=O	-0.15
920	c1ccc(-c2nnc(N3CCN(c4ncccn4)CC3)cc2-c2ccncc2)cc1	-0.15
921	NC(N)=O	-0.14
922	Cl/C=C\Cl	-0.13
923	CCC1(c2ccccc2)C(=O)NC(=O)NC1=O	-0.12
924	CCC1(O)CC2CN(CCc3c([nH]c4ccccc34)C(C(=O)OC)(c3cc4c(cc3OC)N(C)C3C(O)(C(=O)OC)C(OC(C)=O)C5(CC)C=CCN6CCC43C65)C2)C1	-0.1
925	O=C1NC(=O)C(c2ccccc2)(c2ccccc2)N1	-0.1
926	CCCC(C)C1(CC)C(=O)NC(=S)NC1=O	-0.1
927	Cc1cc(=O)n(-c2ccccc2)n1C	-0.1
928	CC(C)O	-0.1
929	CCC(C)=O	-0.1
930	CC(C)NCC(O)COc1cccc2[nH]ccc12	-0.1
931	NC(=O)N1c2ccccc2C=Cc2ccccc21	-0.1
932	Cn1c(=O)c2c(ncn2C)n(C)c1=O	-0.1
933	CC1(C)O[C@@H]2CO[C@@]3(COS(N)(=O)=O)OC(C)(C)O[C@H]3[C@@H]2O1	-0.07
934	CC[C@H](C)C(=O)O[C@H]1C[C@@H](C)C=C2C=C[C@H](C)[C@H](CC[C@@H]3C[C@@H](O)CC(=O)O3)[C@H]21	-0.07
935	CC[C@@H](C(N)=O)N1CCCC1=O	-0.04
936	O=S(=O)(c1ccc2cc[nH]c2c1)N1CCCC1CCN1CCC(Oc2cccc(Cl)c2)CC1	-0.04
937	CC(C)(C)c1cnc(CSc2cnc(NC(=O)C3CCNCC3)s2)o1	-0.01
938	Cc1nc2n(c(=O)c1CCN1CCC(c3noc4cc(F)ccc34)CC1)CCCC2	0
939	CCOCC	0
940	COc1ccc2c(c1)[C@]13CCCC[C@@H]1[C@H](C2)N(C)CC3	0.02
941	CCCCNC(=S)Nc1ccccc1	0.03
942	[Xe]	0.03
943	CCC1(CCC(C)C)C(=O)NC(=O)NC1=O	0.04
944	CN(CC=CC#CC(C)(C)C)Cc1cccc2ccccc12	0.08
945	CN1C(=O)NC(=O)C(C)(C2=CCCCC2)C1=O	0.1
946	C1CC1	0.1
947	C=COC=C	0.1
948	CCCC(C)C1(CC)C(=O)NC(=O)NC1=O	0.1
949	Clc1cccc(Cl)c1NC1=NCCN1	0.1
950	Nc1ccc(-c2nc3ccc(O)cc3s2)cc1I	0.2
951	CCCN(CCC)CCc1cccc2c1CC(=O)N2	0.2
952	CSc1ccc2c(c1)N(CCC1CCCCN1C)c1ccccc1S2	0.2
953	COC(F)(F)C(Cl)Cl	0.2
954	CCc1ccccc1	0.2
955	Cc1cccc(C)c1	0.2
956	FC(F)OC(F)(F)C(F)Cl	0.24
957	CN1CCCC1c1cccnc1	0.24
958	CCCBr	0.27
959	Cc1cccc(OCC(O)CNC(C)C)c1	0.28
960	ClC=C(Cl)Cl	0.3
961	FC(F)(F)C(Cl)Br	0.3
962	ClC(Cl)Cl	0.3
963	CN1C(=O)CC(=O)N(c2ccccc2)c2cc(Cl)ccc21	0.3
964	CC(Cl)(Cl)Cl	0.4
965	O=C1CC(=O)N(c2ccccc2)c2cc(Cl)ccc2N1	0.4
966	OCCOCCN1CCN(C(c2ccccc2)c2ccc(Cl)cc2)CC1	0.4
967	c1ccccc1	0.4
968	Cc1ccccc1	0.4
969	Cc1ccc(C)cc1	0.4
970	Cc1ncc2n1-c1ccc(Cl)cc1C(c1ccccc1F)=NC2	0.4
971	c1ccc(C2(N3CCCCC3)CCCCC2)cc1	0.4
972	FC(F)OC(Cl)C(F)(F)F	0.42
973	O=C1Nc2ccc(Cl)cc2C(c2ccccc2Cl)=NC1O	0.44
974	Nc1nnc(-c2cccc(Cl)c2Cl)c(N)n1	0.48
975	CN1C(=O)CN=C(c2ccccc2)c2cc(Cl)ccc21	0.5
976	O=C1CC2(CCCC2)CC(=O)N1CCCCN1CCN(c2ncccn2)CC1	0.5
977	O=C1CN=C(c2ccccc2)c2cc(Cl)ccc2N1	0.5
978	CC(C)=CCN1CCC2(C)c3cc(O)ccc3CC1C2C	0.54
979	COc1ccc2c3c1OC1C(O)C=CC4C(C2)N(C)CCC341	0.6
980	CCC(=O)N(c1ccccc1)C1CCN(CCc2ccccc2)CC1	0.6
981	COc1ccc2c3c1O[C@H]1[C@@H](O)C=C[C@H]4[C@@H](C2)N(C)CC[C@]314	0.6
982	CC(C)NCC(O)COc1cccc2ccccc12	0.64
983	CC(C)(C)N1CCC(c2ccccc2)(c2ccccc2)CC1	0.66
984	Cc1nc(Nc2ccc(F)cc2)nc(N2CCc3ccccc3C2C)c1C	0.68
985	CC(C)c1cccc(C(C)C)c1O	0.7
986	COc1cccc([C@@]2(O)CCCC[C@@H]2CN(C)C)c1	0.7
987	Cc1nnc2n1-c1ccc(Cl)cc1C(c1ccccc1Cl)=NC2	0.7
988	CNCCC(Oc1ccc(C(F)(F)F)cc1)c1ccccc1	0.72
989	CN(C)C(=O)C(CCN1CCC(O)(c2ccc(Cl)cc2)CC1)(c1ccccc1)c1ccccc1	0.77
990	Cc1cc2c(s1)Nc1ccccc1N=C2N1CCN(C)CC1	0.8
991	CCCCCCC	0.8
992	CCCCC	0.8
993	CCCCCC	0.8
994	CN(C)CCCN1c2ccccc2CCc2ccccc21	0.8
995	CCCCCC(C)C	0.86
996	COC(=O)C(c1ccccc1)C1CCCCN1	0.88
997	COc1cc2c(cc1OC)C(=O)C(CC1CCN(Cc3ccccc3)CC1)C2	0.89
998	CCC(=O)C(CC(C)N(C)C)(c1ccccc1)c1ccccc1	0.9
999	CN(C)CCC=C1c2ccccc2CCc2ccccc21	0.9
1000	C1CCCCC1	0.9
1001	CNC(C)Cc1ccccc1	0.9
1002	CC/C(=C(\c1ccccc1)c1ccc(OCCN(C)C)cc1)c1ccccc1	0.92
1003	CCCCCCC(C)C	0.98
1004	CN(C)CCCC1(c2ccc(F)cc2)OCc2cc(C#N)ccc21	0.99
1005	CN1CC[C@@]2(C)c3cc(OC(=O)Nc4ccccc4)ccc3N(C)[C@@H]12	1
1006	CN(C)CCCN1c2ccccc2Sc2ccc(Cl)cc21	1.06
1007	NCCCN1c2ccccc2CCc2ccccc21	1.1
1008	CNCCCN1c2ccccc2CCc2ccccc21	1.2
1009	CN(C)CCCN1c2ccccc2Sc2ccccc21	1.23
1010	CN(C)CCOC(c1ccccc1)c1ccccc1	1.3
1011	CNCCCN1c2ccccc2Sc2ccc(Cl)cc21	1.4
1012	CN[C@H]1CC[C@@H](c2ccc(Cl)c(Cl)c2)c2ccccc21	1.6

## Sheet: Sheet2_2D QSAR Model
Values of descriptors (2D QSAR PLS Model) in the training and test sets
		Training set
Name	TPSA(NO)	mindO	Eta_C	nRCOOH	B09[C-O]	B08[O-O]	B02[N-O]	minsOH	D/Dtr05	B05[C-N]	B09[N-N]	SaaO	B10[C-F]	nC(=N)N2	nOHt	X4Av	F09[N-Br]	nImidazoles	minssNH	B08[N-Cl]	D/Dtr07	C-039	nRSSR	O-062	nArOCON	logBB
1	206.3	11.8548	34.5359	2	1	1	1	9.44866	113.138	1	1	0	0	0	0	0.0426972	0	0	2.28793	0	0	0	0	0	0	-2.52
2	149.15	11.4453	39.805	1	1	1	0	9.31576	36.1655	1	0	0	0	0	0	0.0471094	0	0	0	0	0	0	0	0	0	-2.15
3	149.15	11.479	40.0824	1	1	1	0	9.34458	36.843	1	0	0	0	0	0	0.0475421	0	0	0	0	0	0	0	0	0	-2.09
4	78.94	12.3912	28.5098	0	1	0	1	0	0	1	0	0	0	0	0	0.0665936	1	0	3.02291	0	0	0	0	0	0	-1.88
5	117.51	12.6991	21.6479	0	1	1	1	9.5869	96.7633	1	0	4.89967	0	0	0	0.0364021	0	1	0	1	54.8141	0	0	0	0	-1.82
6	117.51	12.7432	23.4755	0	1	1	1	9.2615	102.995	1	0	5.08092	0	0	1	0.0366459	0	1	0	1	58.1928	0	0	0	0	-1.82
7	189.53	0	26.7929	0	1	1	0	9.07666	67.2453	0	0	0	0	0	0	0.0424406	0	0	0	0	0	0	0	0	0	-1.7
8	128.33	11.355	28.3259	0	1	0	1	10.229	0	1	0	0	0	0	0	0.0613664	0	0	2.51025	0	0	0	0	0	0	-1.67
11	110.43	11.4511	26.1266	0	1	0	1	0	72.7611	1	1	0	0	0	0	0.0524051	0	0	2.45546	0	0	0	0	0	0	-1.52
12	220.15	12.3639	97.4078	0	1	1	1	11.32	82.18	1	0	0	0	0	0	0.0482321	0	0	2.69952	0	0	1	0	0	0	-1.52
13	555.44	14.2105	244.363	0	1	1	1	10.3173	0	1	1	0	0	0	0	0.045104	0	0	2.51594	1	0	0	0	0	0	-1.48
14	84.93	0	13.6037	0	0	0	0	0	56.9188	1	1	0	0	1	0	0.0885552	0	0	2.46282	0	0	0	0	0	0	-1.42
15	112.9	12.9405	36.3963	0	1	1	1	0	81.5712	1	1	0	0	0	0	0.0576287	0	1	2.81069	0	0	0	0	0	0	-1.4
16	70.16	10.7306	10.3578	1	0	0	0	8.77122	0	0	0	0	0	0	0	0.0467161	0	0	2.58032	0	0	1	0	0	0	-1.33
19	93.03	11.4752	11.9244	0	0	0	1	9.0182	68.6508	1	0	0	0	0	0	0.0411657	0	1	2.47481	0	0	0	0	0	0	-1.3
20	86.26	10.3386	15.8137	0	1	0	0	0	67.9439	1	0	5.64745	0	0	0	0.0712683	0	0	2.72789	0	0	0	0	0	0	-1.23
21	86.59	10.3859	17.342	0	1	0	0	0	72.5097	1	1	5.68378	0	0	0	0.0768161	0	0	2.97605	0	0	0	0	0	0	-1.23
23	53.43	10.7628	20.8677	1	1	0	0	8.83129	83.1704	1	0	0	0	0	0	0.0560709	0	0	0	0	0	0	0	0	0	-1.14
24	86.59	10.7608	18.1556	0	1	0	0	0	144.593	1	1	5.71813	0	0	0	0.0649055	0	0	3.06462	0	0	0	0	0	0	-1.12
25	57.36	11.0749	17.0742	0	1	0	1	0	102.798	1	1	0	0	0	0	0.0513996	0	0	2.82329	0	0	0	0	0	0	-1.01
26	170.06	14.3661	121.961	0	1	1	0	10.5117	109.486	0	0	0	0	0	1	0.0579749	0	0	0	0	0	0	0	0	0	-1
27	74.87	13.0141	24.6292	0	1	1	1	0	82.0971	1	0	0	0	0	0	0.0420552	0	0	0	0	0	0	0	0	0	-1
29	92.95	12.2347	25.7654	0	1	1	1	8.92999	82.4786	1	0	0	0	0	0	0.0476924	0	0	2.90795	0	0	0	0	0	0	-1
31	76.07	12.2764	34.3088	0	1	1	0	9.99731	0	1	0	0	0	0	0	0.0589269	0	0	0	0	0	0	0	0	0	-0.92
32	91.48	13.2982	34.1895	0	1	0	1	11.5107	103.725	1	1	0	0	0	1	0.0590022	0	0	2.9596	0	0	0	0	0	0	-0.89
33	60.85	12.7236	25.3394	0	1	0	1	9.57135	0	1	0	0	0	0	0	0.10223	0	0	0	0	0	0	0	0	0	-0.89
34	93.45	11.7907	17.9313	0	0	0	1	0	0	1	0	0	0	0	0	0.0468088	0	0	2.68695	0	0	0	0	0	0	-0.85
35	76.07	11.9084	32.3399	0	1	1	0	9.97395	0	1	0	0	0	0	0	0.056163	0	0	0	0	0	0	0	0	0	-0.81
36	63.6	10.1574	7.00204	1	0	0	0	8.30739	0	0	0	0	0	0	0	0.0415101	0	0	0	0	0	0	0	0	0	-0.8
38	93.7	12.7064	30.9704	0	1	0	1	0	0	1	1	0	0	0	0	0.0597573	0	0	3.04782	0	0	0	0	0	0	-0.8
40	278.8	13.8911	191.749	0	1	1	1	12.0192	0	1	1	0	0	0	0	0.0598921	0	0	2.67194	0	0	0	0	0	0	-0.78
41	278.8	13.8911	191.749	0	1	1	1	12.0192	0	1	1	0	0	0	0	0.0598921	0	0	2.67194	0	0	0	0	0	0	-0.78
42	278.8	13.8839	191.765	0	1	1	1	12.0888	0	1	1	0	0	0	0	0.0600073	0	0	2.66999	0	0	0	0	0	0	-0.78
44	44.2	0	22.2246	0	1	0	0	0	171.418	1	1	5.83015	0	0	0	0.0669644	0	0	3.45474	0	0	0	0	0	0	-0.73
45	132.56	11.2924	15.9911	0	0	0	1	9.18267	52.4019	1	0	0	0	0	0	0.0444548	0	0	2.19209	0	0	0	0	0	0	-0.72
48	145.78	12.8886	64.4624	0	1	0	1	11.6637	391.79	1	0	0	0	0	0	0.0658668	0	0	2.85074	0	0	0	0	0	0	-0.7
49	63.95	0	36.1939	0	1	0	0	0	0	1	0	0	0	0	0	0.0603618	0	0	0	0	0	0	0	0	0	-0.7
50	78.64	10.874	12.1434	0	0	0	1	8.81215	41.9924	1	0	0	0	0	0	0.048426	0	0	2.10579	0	0	0	0	0	0	-0.69
52	104.08	0	4.43133	0	0	0	0	0	0	0	0	0	0	0	0	0.0417746	0	0	0	0	0	0	0	0	0	-0.67
53	83.1	10.7219	16.5524	0	1	0	0	0	63.3242	1	1	0	0	0	0	0.0806018	1	0	3.05307	0	0	0	0	0	0	-0.67
54	64.09	12.3272	20.0075	0	1	0	1	0	82.6731	1	0	0	0	0	0	0.0425087	0	0	2.60213	0	0	0	0	0	0	-0.66
55	58.64	11.9862	34.5384	0	1	1	1	0	0	1	0	0	1	0	0	0.0491395	0	0	2.6479	0	0	0	0	0	0	-0.66
56	83.1	10.6897	12.9963	0	1	0	0	0	60.1992	1	1	0	0	0	0	0.0687267	0	0	3.05018	0	0	0	0	0	0	-0.66
57	104.7	12.8015	52.2427	0	1	0	1	0	513.322	1	0	0	0	0	0	0.0478369	0	0	0	1	0	0	0	0	0	-0.64
58	72.19	11.1476	17.7013	0	1	1	1	0	73.3549	1	0	0	0	0	0	0.0568501	0	0	2.86283	0	0	0	0	0	0	-0.62
59	62.16	0	26.7438	0	0	0	0	10.6444	20.2859	1	0	0	0	0	1	0.0506637	0	0	0	0	0	0	0	0	0	-0.6
60	94.81	11.2196	16.9063	0	1	0	1	0	0	1	0	0	0	0	0	0.0471591	0	0	2.39735	0	51.6601	0	0	0	0	-0.59
61	46.5	12.6806	27.8482	0	1	0	1	0	195.546	1	0	0	0	0	0	0.0547838	0	0	3.06411	0	0	0	0	0	0	-0.59
63	62.16	0	28.2183	0	1	0	0	9.92739	0	1	0	0	0	0	0	0.0499641	0	0	0	0	0	0	0	0	0	-0.57
66	164.63	11.9669	38.6812	0	1	1	1	10.4649	0	1	0	0	0	0	1	0.0448143	0	0	0	0	0	0	0	0	0	-0.52
67	61.72	12.2311	23.2978	0	1	1	1	0	74.3492	1	0	0	0	0	0	0.046729	0	0	2.9291	0	0	0	0	0	0	-0.52
68	72.3	11.2376	26.0988	0	1	0	1	0	76.3058	1	0	0	1	0	0	0.0738464	0	0	2.58446	0	0	0	0	1	1	-0.52
69	58.2	10.6057	13.8359	0	1	0	1	0	0	1	0	0	0	0	0	0.0669734	0	0	2.4458	0	0	0	0	0	0	-0.51
70	37.3	10.534	23.9114	1	1	0	0	8.65283	0	0	0	0	0	0	0	0.0798676	0	0	0	0	0	0	0	0	0	-0.49
71	37.3	10.534	23.9114	1	1	0	0	8.65283	0	0	0	0	0	0	0	0.0798676	0	0	0	0	0	0	0	0	0	-0.49
72	111.5	12.4314	41.8545	0	1	1	1	10.1443	93.6469	1	0	0	0	0	0	0.0372004	0	0	2.98234	1	0	0	0	0	0	-0.46
73	101.82	12.7244	27.8129	0	1	1	1	0	138.269	1	1	0	0	0	0	0.0498831	0	0	3.02072	0	0	0	0	0	0	-0.4
74	77.25	12.8139	14.7322	0	1	1	1	0	53.3209	1	0	4.89113	0	0	0	0.0378441	0	0	2.70379	0	0	0	0	0	0	-0.4
75	41.03	0	10.961	0	0	0	0	0	0	0	0	0	0	0	0	0.0485178	0	0	0	0	0	0	0	2	0	-0.38
76	79.31	12.5334	35.2671	0	1	1	1	10.0148	0	1	0	0	0	0	0	0.0580026	0	0	0	0	0	0	0	0	0	-0.37
77	69.39	11.4475	17.1841	0	0	1	1	0	0	1	0	0	0	0	0	0.0478477	0	0	0	0	45.0184	0	0	0	0	-0.34
78	55.62	11.9355	12.9054	0	0	0	1	0	0	1	0	0	0	0	0	0.0441542	0	0	0	0	32.418	0	0	0	0	-0.34
79	33.2	11.2633	8.08131	0	0	0	1	0	32.1532	1	0	0	0	0	0	0.0589121	0	0	0	0	0	0	0	0	0	-0.32
80	221.29	12.9782	100.232	0	1	1	1	11.7799	0	1	0	0	0	0	1	0.0480915	0	0	2.72288	0	0	0	0	0	0	-0.3
81	85.84	12.355	19.122	0	1	1	1	0	87.1224	1	0	5.26302	0	0	0	0.037329	0	1	2.85319	1	48.9518	0	0	0	0	-0.3
82	78.14	12.3521	16.9942	0	1	0	1	0	0	1	0	0	1	0	0	0.0400772	0	0	2.82374	0	72.0358	1	0	0	0	-0.3
83	65.34	11.3728	7.51815	0	0	0	1	0	22.5214	1	0	0	0	0	0	0.0362524	0	0	0	0	0	0	0	0	0	-0.29
84	65.01	11.4075	8.28084	0	0	0	1	0	22.5214	1	0	0	0	0	0	0.0418082	0	0	2.81292	0	0	0	0	0	0	-0.29
86	86.01	11.0765	17.7572	0	1	0	0	0	71.7172	1	0	0	0	0	0	0.0471679	0	0	2.97197	0	0	0	0	0	0	-0.28
88	43.86	12.3144	32.3021	0	1	0	1	0	182.487	1	0	0	0	0	0	0.0742646	0	0	0	0	0	1	0	0	0	-0.25
89	43.09	10.4231	3.45908	0	0	0	1	0	0	1	0	0	0	0	0	0.0502016	0	0	0	0	0	0	0	0	0	-0.24
90	85.61	12.4511	18.512	0	0	0	1	0	0	1	0	0	0	0	0	0.0546381	0	0	2.97417	0	0	0	0	0	0	-0.22
92	101.88	0	16.706	0	0	0	0	9.25714	89.3858	1	0	0	0	0	0	0.0423249	0	1	3.35858	0	0	0	0	0	0	-0.22
93	60.69	0	3.54223	0	0	0	0	7.92477	0	0	0	0	0	0	0	0.057735	0	0	0	0	0	0	0	0	0	-0.21
94	27.05	0	20.0457	0	0	0	0	0	143.608	1	0	0	0	0	0	0.0685688	0	1	0	0	0	0	0	0	0	-0.2
96	37.3	10.7624	12.4848	1	1	0	0	8.85016	0	0	0	0	0	0	0	0.064849	0	0	0	0	0	0	0	0	0	-0.18
97	94.83	11.8086	36.2768	0	1	0	0	9.36312	37.4146	0	0	0	0	0	1	0.0678366	0	0	0	0	0	0	0	0	0	-0.18
98	68.17	12.1725	23.6075	0	1	0	1	10.2121	0	1	0	0	0	0	0	0.0575422	0	0	2.55214	0	0	0	0	0	0	-0.17
99	63.32	9.57407	3.23236	1	0	0	0	7.86574	0	0	0	0	0	0	0	0	0	0	0	0	0	0	0	0	0	-0.17
100	64.63	11.6144	20.0662	0	1	1	0	0	0	1	0	0	1	0	0	0.0478609	0	0	2.88615	0	0	0	0	0	0	-0.17
104	81.93	12.9884	18.518	0	1	0	1	0	60.5209	1	0	0	0	0	0	0.0377464	0	0	2.76865	0	0	0	0	0	0	-0.12
107	81.99	0	13.6171	0	0	0	0	0	45.636	1	0	0	0	0	0	0.0368255	0	0	0	0	0	0	0	0	0	-0.1
108	169.52	11.7557	63.3233	0	1	1	1	11.2812	0	1	0	0	0	0	0	0.0563368	0	0	2.59063	0	0	0	0	0	0	-0.09
109	169.52	11.7557	63.3233	0	1	1	1	11.2812	0	1	0	0	0	0	0	0.0563368	0	0	2.59063	0	0	0	0	0	0	-0.09
110	46.92	12.609	23.7568	0	0	0	1	0	49.8956	1	1	0	0	0	0	0.0688536	0	0	3.31579	0	0	0	0	0	0	-0.08
111	60.85	12.6724	22.4962	0	1	0	1	9.5201	0	1	0	0	0	0	0	0.0948955	0	0	0	0	0	0	0	0	0	-0.08
112	40.16	0	24.0213	0	1	0	0	0	0	1	0	0	0	0	0	0.0501863	0	0	0	0	0	0	0	0	0	-0.07
113	52.83	0	19.4307	0	1	0	0	0	86.3794	1	1	0	0	0	0	0.0416588	0	0	0	0	0	0	0	0	0	-0.06
114	56.22	11.5234	9.73604	0	0	0	1	0	24.7694	1	0	0	0	0	0	0.0426923	0	0	0	0	0	0	0	0	0	-0.06
115	67.15	12.501	16.0538	0	1	0	1	0	0	1	0	0	0	0	0	0.0472728	0	0	2.90855	0	0	0	0	0	0	-0.05
116	128.95	11.3233	15.5349	0	0	0	1	9.16788	52.4019	1	0	0	0	0	0	0.0486009	0	0	2.21892	0	0	0	0	0	0	-0.05
118	43.86	12.3159	30.7789	0	1	0	1	0	95.3066	1	0	0	1	0	0	0.0568712	0	0	0	0	0	1	0	0	0	-0.01
119	176.61	12.4252	41.4593	0	1	1	0	10.0979	0	1	0	0	0	0	1	0.0427009	0	0	0	0	0	2	0	0	0	0
121	110.85	0	11.8321	0	1	0	1	0	57.8919	1	0	5.28472	0	0	0	0.0348108	0	0	0	0	0	0	0	0	0	0
122	82.15	12.3203	18.0181	0	1	0	1	8.98225	0	1	0	0	0	0	0	0.0494153	0	0	0	0	58.5896	0	0	0	0	0
124	145.44	0	43.2545	0	1	0	0	9.64432	0	1	0	0	0	0	0	0.0500472	0	0	0	0	0	0	0	0	0	0
125	54.77	0	36.2642	0	0	0	0	0	102.372	1	0	0	1	0	0	0.0484546	0	1	3.37333	0	0	0	0	0	0	0.01
127	78.84	13.6737	34.1973	0	1	0	1	0	180.785	1	0	0	0	0	0	0.0421613	0	0	3.18003	0	0	2	0	0	0	0.02
128	48.38	0	0.507545	0	0	0	1	6.75	0	0	0	0	0	0	0	0	0	0	0	0	0	0	0	0	0	0.03
129	83.95	11.4944	20.8083	0	1	0	1	0	0	1	0	0	0	0	0	0.0487964	0	0	0	0	59.9182	0	0	0	0	0.04
130	103.78	10.4738	10.0995	1	0	0	0	8.58113	0	1	0	0	0	0	0	0.0530499	0	0	0	0	0	0	0	0	0	0.05
131	49.56	0	30.0765	0	0	0	0	0	59.1415	1	1	0	0	0	0	0.0445077	0	0	0	0	0	0	0	0	0	0.07
132	154.1	13.002	102.997	0	1	1	0	11.9761	223.214	1	1	0	0	0	2	0.0503959	0	0	0	0	0	0	0	0	0	0.07
133	44.81	11.3534	18.1241	0	1	0	1	0	66.943	1	0	0	0	0	0	0.0539529	0	0	2.47303	0	0	0	0	0	1	0.08
134	63.6	11.1743	15.9239	0	1	0	0	9.14279	0	0	0	0	0	0	0	0.0514075	0	0	0	0	0	0	0	0	0	0.09
135	39.82	12.8722	17.2346	0	0	0	1	0	22.5441	1	0	0	0	0	0	0.0406591	0	0	0	0	0	0	0	0	0	0.11
137	75.27	11.0042	16.1256	0	0	0	1	0	0	1	0	0	0	0	0	0.0621111	0	0	2.18104	0	0	0	0	0	0	0.12
138	9.23	0	2.81812	0	0	0	0	0	0	0	0	0	0	0	0	0.0349174	0	0	0	0	0	0	0	0	0	0.13
139	9.23	0	2.81812	0	0	0	0	0	0	0	0	0	0	0	0	0.0349174	0	0	0	0	0	0	0	0	0	0.13
140	57.53	9.44907	3.13221	1	0	0	0	7.74074	0	0	0	0	0	0	0	0	0	0	0	0	0	0	0	0	0	0.16
141	39.68	11.5751	27.6156	0	1	0	1	0	91.4648	1	0	0	1	0	0	0.0642706	0	0	0	0	0	0	0	0	0	0.16
142	65.72	0	28.5814	0	1	0	0	9.95632	0	1	0	0	0	0	0	0.0497782	0	0	0	0	0	0	0	0	0	0.17
143	50.72	0	18.8267	0	0	0	0	9.91567	19.1001	1	0	0	0	0	0	0.0489296	0	0	3.47873	0	31.3009	0	0	0	0	0.18
144	221.29	12.9763	102.182	0	1	1	1	11.7641	0	1	0	0	1	0	1	0.0476931	0	0	2.61989	0	0	0	0	0	0	0.19
148	93.18	11.5991	25.7545	0	1	0	1	0	0	1	0	0	1	0	0	0.0496263	0	0	0	0	0	0	0	0	0	0.2
149	62.3	12.4239	20.3229	0	1	0	0	9.55779	48.8418	1	0	0	0	0	0	0.0564827	0	0	0	0	68.3154	0	0	0	0	0.23
150	61.72	12.2057	26.841	0	1	1	1	0	81.8159	1	0	0	1	0	0	0.0420429	0	0	2.6132	0	0	0	0	0	0	0.23
151	8.17	0	25.7069	0	0	0	0	0	0	1	0	0	0	0	0	0.0760233	0	0	0	0	0	0	0	0	0	0.24
152	55.04	0	17.5891	0	0	0	0	0	0	1	0	0	0	0	0	0.0690395	0	0	0	0	0	0	0	0	0	0.25
153	0	0	5.65911	0	0	0	0	0	0	0	0	0	0	0	0	0	0	0	0	0	0	0	0	0	0	0.27
155	39.82	13.0345	18.0377	0	0	0	0	0	81.4668	1	0	0	0	0	0	0.0489093	0	1	0	0	0	1	0	0	0	0.28
156	29.1	13.4945	23.6673	0	0	0	1	0	0	1	0	0	0	0	0	0.048756	0	0	3.27199	0	0	0	0	0	0	0.3
157	59.08	11.8623	27.7386	0	1	1	1	0	0	1	0	0	0	0	0	0.0607567	0	0	0	0	80.7261	0	0	0	0	0.3
158	59.08	11.8623	27.7386	0	1	1	1	0	0	1	0	0	0	0	0	0.0607567	0	0	0	0	80.7261	0	0	0	0	0.3
159	37.61	12.8364	33.8553	0	1	0	1	0	96.756	1	0	0	1	0	0	0.056585	0	0	0	0	0	0	0	0	0	0.3
161	87.28	10.9585	11.7058	0	1	1	1	0	0	1	0	0	0	0	0	0.0403509	0	0	2.71214	0	53.461	1	0	0	0	0.32
162	39.19	12.7986	22.2275	0	1	0	0	0	0	1	0	0	0	0	0	0.0624855	0	0	0	0	0	1	0	0	0	0.33
163	46.33	13.59	36.9464	0	0	0	1	0	0	1	0	0	1	0	0	0.0442833	0	0	0	0	0	0	0	0	0	0.34
164	70	12.5238	23.4515	0	0	0	0	10.2009	19.0831	1	0	0	0	0	1	0.0489824	0	0	0	0	0	0	0	0	0	0.35
165	0	0	6.44156	0	0	0	0	0	0	0	0	0	0	0	0	0	0	0	0	0	0	0	0	0	0	0.35
166	68.62	0	17.0394	0	1	0	0	9.29416	0	1	0	0	0	0	0	0.0448332	0	0	3.33958	0	0	0	0	0	0	0.38
167	21.26	0	14.5557	0	0	0	0	0	21.2151	1	0	0	0	0	0	0.0517136	0	0	3.49466	0	27.318	0	0	0	0	0.39
168	42.52	0	22.3507	0	1	0	0	0	51.7342	1	0	0	0	0	0	0.0574739	0	0	3.67818	0	0	0	0	0	0	0.39
171	170.06	14.3661	121.961	0	1	1	0	10.5117	109.486	0	0	0	0	0	1	0.0579749	0	0	0	0	0	0	0	0	0	0.4
174	9.23	0	7.13025	0	0	0	0	0	0	0	0	0	0	0	0	0.0350326	0	0	0	0	0	0	0	0	0	0.42
175	35.82	0	7.43569	0	0	0	0	0	0	1	0	0	0	0	0	0.0716683	0	0	3.21229	0	0	0	0	0	0	0.42
176	51.02	13.0827	23.6598	0	0	0	1	0	33.5259	1	0	0	0	0	0	0.0604105	0	0	0	0	69.9799	0	0	0	0	0.43
177	54.46	12.56	31.3391	0	1	0	1	0	0	1	0	0	1	0	0	0.0543632	0	0	2.99297	0	0	0	0	0	0	0.48
178	23.47	0	24.633	0	1	0	0	9.86526	0	1	0	0	0	0	0	0.064953	0	0	0	0	0	0	0	0	0	0.51
179	32.67	12.1287	18.2376	0	0	0	1	0	36.5389	1	0	0	0	0	0	0.0599682	0	0	0	0	55.2123	1	0	0	0	0.51
180	278.8	13.8839	191.765	0	1	1	1	12.0888	0	1	1	0	0	0	0	0.0600073	0	0	2.66999	0	0	0	0	0	0	0.52
181	125.23	11.2048	57.7494	0	1	1	1	0	0	1	0	0	0	0	0	0.0798171	0	0	0	0	0	0	1	0	0	0.53
182	41.93	0	23.0742	0	0	0	0	10.5542	19.302	1	0	0	0	0	0	0.0503621	0	0	0	0	0	0	0	0	0	0.55
183	41.93	0	23.0742	0	0	0	0	10.5542	19.302	1	0	0	0	0	0	0.0503621	0	0	0	0	0	0	0	0	0	0.55
184	186.45	13.4868	54.6454	0	1	1	0	10.3945	0	1	0	0	0	0	1	0.0445517	0	0	0	0	0	2	0	0	0	0.56
185	186.45	13.4868	54.6454	0	1	1	0	10.3945	0	1	0	0	0	0	1	0.0445517	0	0	0	0	0	2	0	0	0	0.56
186	61.6	12.7689	23.2552	0	1	0	1	0	0	1	0	0	0	0	0	0.0527842	0	0	2.96249	0	0	0	0	0	0	0.56
187	55.48	0	5.86717	0	0	0	0	9.3838	0	1	0	0	0	0	0	0.0472215	0	0	0	0	0	0	0	0	0	0.56
188	38.77	12.5576	24.1353	0	0	0	0	0	19.302	1	0	0	0	0	0	0.0545254	0	0	0	0	0	0	0	0	0	0.57
189	48.83	0	28.9228	0	1	0	0	10.2671	75.4618	1	0	0	1	0	0	0.0652702	0	0	0	0	0	0	0	0	0	0.59
190	48.83	0	28.9228	0	1	0	0	10.2671	75.4618	1	0	0	1	0	0	0.0652702	0	0	0	0	0	0	0	0	0	0.59
191	58.36	12.1227	12.6211	0	0	0	1	0	0	1	0	0	0	0	0	0.0495385	0	0	2.81237	0	0	0	0	0	0	0.6
192	61.92	12.44	23.2597	0	1	0	1	0	0	1	0	0	1	0	0	0.0466511	0	0	0	0	70.4803	0	0	0	0	0.6
193	61.69	11.7374	12.9003	0	0	0	1	9.79836	0	1	0	0	0	0	0	0.0419869	0	0	2.63694	0	48.2065	1	0	0	0	0.61
194	33.2	13.0596	28.2008	0	0	0	1	0	0	1	0	0	1	0	0	0.0433344	0	0	0	0	0	0	0	0	0	0.68
195	63.41	0	20.1025	0	1	0	0	9.40091	73.8579	1	0	0	0	0	0	0.043732	0	0	0	0	0	0	0	0	0	0.71
196	41.93	0	28.4761	0	1	0	0	9.91086	0	1	0	0	1	0	0	0.0497704	0	0	0	0	0	0	0	0	0	0.73
200	12.47	0	29.6418	0	0	0	0	0	72.1364	1	0	0	1	0	0	0.0639253	0	0	0	0	97.3525	0	0	0	0	0.75
201	58.36	12.5231	18.1944	0	0	0	1	0	73.3549	1	0	0	0	0	0	0.0579949	0	0	2.91935	0	0	0	0	0	0	0.77
202	16.13	0	15.9691	0	0	0	0	0	64.6981	1	0	0	0	0	0	0.0598104	0	0	0	0	0	0	0	0	0	0.77
204	26.02	0	6.47372	0	0	0	0	0	0	1	0	0	0	0	0	0.0552996	0	0	0	0	0	0	0	0	0	0.81
205	6.48	0	25.6667	0	0	0	0	0	0	1	0	0	0	0	0	0.0799543	0	0	0	0	89.1949	0	0	0	0	0.83
206	6.48	0	15.5522	0	0	0	0	0	0	1	0	0	0	0	0	0.0539668	0	0	0	0	0	0	0	0	0	0.83
207	58.36	12.5705	17.6722	0	1	0	1	0	0	1	0	0	0	0	0	0.0482045	0	0	2.92254	0	0	0	0	0	0	0.88
208	33.2	13.0165	28.0808	0	0	0	1	0	0	1	0	0	1	0	0	0.0438808	0	0	0	0	0	0	0	0	0	0.89
209	35.58	11.5251	31.636	0	0	0	1	0	0	1	0	0	0	0	0	0.0802488	0	0	3.14839	0	0	0	0	0	0	0.9
211	54.38	0	14.1926	0	1	0	0	9.05164	0	1	0	0	0	0	0	0.0432481	0	0	3.25534	0	0	0	0	0	0	0.9
212	24.94	0	29.2278	0	1	0	0	0	0	1	0	0	0	0	0	0.0773895	0	0	0	0	0	0	0	0	0	0.9
213	41.93	0	29.938	0	1	0	0	9.89973	0	1	0	0	1	0	0	0.0487716	0	0	0	0	0	0	0	0	0	0.92
214	33.29	0	27.3421	0	1	0	0	0	0	1	0	0	0	0	0	0.0623868	0	0	3.69223	0	0	0	0	0	0	0.98
215	52.65	11.3446	31.1421	0	0	0	1	0	0	1	0	0	0	0	0	0.09224	0	0	2.74909	0	0	0	0	0	0	1
216	6.48	0	19.8011	0	0	0	0	0	0	1	0	0	0	0	0	0.0575281	0	0	0	1	46.9895	0	0	0	0	1.04
217	41.57	12.0698	31.1522	0	1	0	1	0	0	1	0	0	1	0	0	0.0636484	0	0	2.93276	0	0	0	0	0	0	1.04
219	35.58	11.1571	29.7257	0	0	0	1	0	0	1	0	0	0	0	0	0.080915	0	0	3.06159	0	0	0	0	0	0	1.08
221	42.52	0	24.0523	0	1	0	0	0	0	1	0	0	1	0	0	0.0556481	0	0	3.47193	0	0	0	0	0	0	1.11
222	12.03	0	12.5691	0	0	0	0	0	17.8282	1	0	0	0	0	0	0.0507143	0	0	3.78833	0	25.0749	0	0	0	0	1.11
224	41.93	0	28.3864	0	1	0	0	9.91292	0	1	0	0	1	0	0	0.0500311	0	0	0	0	0	0	0	0	0	1.25
225	23.47	0	25.5944	0	0	0	0	11.6113	0	1	0	0	0	0	1	0.0863265	0	0	0	0	0	0	0	0	0	1.32
227	23.55	12.1701	23.0393	0	1	0	0	0	0	1	0	0	1	0	0	0.0668069	0	0	0	1	103.004	1	0	0	0	1.48
228	16.13	0	14.5041	0	0	0	0	0	0	1	0	0	0	0	0	0.0598889	0	0	0	1	0	0	0	0	0	1.53
229	73.1	0	16.9406	0	0	0	0	0	0	1	0	0	0	1	0	0.0979376	2	0	2.51658	0	0	0	0	0	0	-2.15
230	120.73	10.3179	8.41273	0	1	0	1	0	99.9769	1	0	4.77527	0	0	0	0.0322426	0	0	2.02203	0	0	0	0	0	0	-2.09
231	160.83	13.3851	50.6899	0	1	1	0	10.5666	134.71	0	0	0	0	0	0	0.0434542	0	0	0	0	0	0	0	0	0	-2
233	93.81	11.1665	21.947	1	1	1	1	9.16015	0	1	0	0	0	0	0	0.0638814	0	0	3.17441	0	0	0	0	0	0	-1.96
234	83.56	12.2821	25.9426	0	1	0	1	0	0	1	0	0	0	1	0	0.058954	1	0	2.81573	0	0	0	0	0	0	-1.9
235	219.93	11.2015	41.4953	2	1	1	1	9.11277	115.13	1	1	0	0	0	0	0.0702657	0	0	2.53291	0	0	0	0	0	0	-1.89
237	117.51	12.7432	23.4755	0	1	1	1	9.2615	102.995	1	0	5.08092	0	0	1	0.0366459	0	1	0	1	58.1928	0	0	0	0	-1.82
239	117.51	12.7874	25.4361	0	1	1	1	9.54275	109.228	1	0	5.26217	0	0	0	0.0370246	0	1	0	1	61.5715	0	0	0	0	-1.82
240	66.84	10.6579	10.5606	1	0	0	1	8.73799	37.9405	0	0	0	0	0	0	0.0866721	0	0	0	0	0	0	0	0	0	-1.72
241	118.22	12.2807	16.0474	0	1	1	0	9.34497	0	0	0	0	0	0	0	0.0440762	0	0	0	0	0	1	0	0	0	-1.7
242	37.3	10.8435	11.5815	1	1	0	0	8.89021	0	0	0	0	0	0	0	0.0460281	0	0	0	0	0	0	0	0	0	-1.68
243	121.38	0	10.5186	0	0	0	0	8.34332	0	0	0	0	0	0	0	0.0559341	0	0	0	0	0	0	0	0	0	-1.6
244	106.39	11.0161	12.3642	0	0	0	1	0	53.0198	1	1	0	0	1	0	0.0544679	0	0	2.72309	0	0	0	0	0	0	-1.57
245	113.29	10.6199	28.5196	1	1	1	0	8.71353	0	0	0	0	0	0	0	0.0524279	0	0	0	0	0	1	0	0	0	-1.52
246	85.97	11.3054	25.5151	0	1	0	0	10.0858	0	0	0	0	0	0	0	0.0466571	0	0	0	0	0	1	0	0	0	-1.52
247	210.54	10.6729	25.7284	2	1	0	1	8.72404	0	1	1	0	0	0	0	0.0409094	0	0	2.33661	0	0	0	0	0	0	-1.52
248	210.54	10.6729	25.7284	2	1	0	1	8.72404	0	1	1	0	0	0	0	0.0409094	0	0	2.33661	0	0	0	0	0	0	-1.5
249	90.37	11.4514	11.0626	0	0	0	1	8.89611	38.6924	1	0	0	0	0	0	0.0477348	0	0	0	0	0	0	0	0	0	-1.5
250	84.58	10.721	14.2581	0	1	0	1	9.55715	0	1	0	0	0	0	0	0.0560281	0	0	2.9198	0	0	0	0	0	0	-1.42
251	74.6	12.2304	66.6339	1	1	1	0	10.049	0	0	0	0	0	0	0	0.0745518	0	0	0	0	0	0	0	0	0	-1.4
252	89.75	11.509	22.4064	0	1	1	1	0	105.034	1	0	0	0	0	0	0.0460751	0	1	0	0	0	0	0	0	0	-1.4
253	89.75	11.509	22.4064	0	1	1	1	0	105.034	1	0	0	0	0	0	0.0460751	0	1	0	0	0	0	0	0	0	-1.4
255	73.06	0	22.8394	0	1	0	1	9.84016	72.6981	1	0	0	1	0	0	0.0469868	0	1	0	0	0	0	0	0	0	-1.4
258	97.28	12.7322	22.7146	0	1	1	1	10.0313	96.7633	1	0	5.14967	0	0	1	0.0370625	0	1	0	1	54.8141	0	0	0	0	-1.34
259	74.16	12.4684	28.2704	0	1	0	1	0	108.459	1	1	5.81794	0	1	0	0.0576578	0	0	3.11072	0	0	0	0	0	0	-1.3
260	68.53	11.2656	19.7734	1	1	0	1	9.23265	53.0987	1	0	0	0	0	0	0.0420958	0	0	0	0	0	0	0	0	0	-1.3
261	92.79	12.2882	22.6552	0	1	0	1	0	0	1	0	0	0	1	0	0.0508813	0	0	2.79971	0	0	0	0	0	0	-1.3
262	106.51	12.6344	31.2487	0	1	0	1	9.12261	97.808	1	1	0	0	0	0	0.0569409	0	0	2.73364	1	0	0	0	0	0	-1.3
263	91.54	11.1418	19.965	0	1	0	1	0	0	1	1	0	0	0	0	0.0469552	0	0	2.09419	0	0	0	0	0	0	-1.3
266	66.84	11.2997	21.2972	1	1	0	1	9.26682	53.0987	1	0	0	0	0	0	0.047338	0	0	0	0	0	0	0	0	0	-1.26
270	98.62	10.2486	18.8107	0	1	0	0	0	76.973	1	1	5.4789	0	1	0	0.0768031	0	0	2.79306	0	0	0	0	0	0	-1.23
271	86.59	10.3848	17.9475	0	1	0	0	0	72.5097	1	1	5.69998	0	0	0	0.0753695	0	0	2.96855	0	0	0	0	0	0	-1.23
272	86.26	10.3493	18.0665	0	1	0	0	0	72.5097	1	1	5.69998	0	0	0	0.07432	0	0	2.7394	0	0	0	0	0	0	-1.23
274	203.06	11.9442	103.204	0	1	1	0	9.98754	265.177	0	0	0	0	0	1	0.0657852	0	0	0	0	0	0	0	0	0	-1.23
275	59.39	12.0834	40.5261	0	1	0	1	0	164.095	1	0	0	0	0	0	0.056384	0	1	3.04575	0	0	0	0	0	0	-1.22
276	90.37	11.4277	12.9169	0	0	0	1	8.8558	41.6924	1	0	0	0	0	0	0.0599912	0	0	0	0	0	0	0	0	0	-1.22
277	103.31	0	9.38075	0	0	0	0	0	43.0722	1	1	0	0	1	0	0.0563326	0	0	0	0	0	0	0	0	0	-1.15
278	77.32	13.0721	37.0666	0	1	0	1	0	197.027	1	0	0	0	0	0	0.0729248	0	1	0	0	0	0	0	0	0	-1.15
280	90.02	10.7492	15.3167	0	1	0	0	0	134.633	1	0	5.67118	0	0	0	0.0607286	0	0	3.01591	0	0	0	0	0	0	-1.12
281	101.73	11.4548	20.7311	0	1	0	1	0	71.1929	1	1	0	0	0	0	0.0699941	0	0	2.86233	0	0	0	0	0	0	-1.11
282	118.21	13.6199	65.0231	0	1	1	1	12.1477	241.291	1	1	0	0	0	0	0.0487204	1	0	2.9985	0	0	0	0	0	0	-1.1
283	118.21	13.6199	65.0231	0	1	1	1	12.1477	241.291	1	1	0	0	0	0	0.0487204	1	0	2.9985	0	0	0	0	0	0	-1.1
285	87.05	12.2868	26.2515	0	1	0	1	0	100.999	1	1	5.79633	0	1	0	0.0596245	0	0	2.80702	0	0	0	0	0	0	-1.1
286	42.68	13.588	39.2904	0	1	1	0	0	75.3797	1	0	6.0709	0	0	0	0.0715977	0	0	0	0	0	1	0	0	0	-1.08
287	109.83	12.2847	28.2016	0	1	0	1	0	100.58	1	1	5.76661	0	1	0	0.0580184	0	0	2.79622	0	0	0	0	0	0	-1.06
288	57.36	11.0749	17.0742	0	1	0	1	0	102.798	1	1	0	0	0	0	0.0513996	0	0	2.82329	0	0	0	0	0	0	-1.04
289	171.17	13.002	102.602	0	1	1	1	11.9702	228.03	1	1	0	0	0	2	0.049136	0	0	0	0	0	0	0	0	0	-1.03
290	53.09	12.8687	37.0513	0	1	0	1	0	0	1	1	0	0	0	0	0.0607393	0	0	0	0	0	0	0	0	0	-1
291	88.52	11.3283	26.8854	1	1	0	1	9.26522	0	1	0	0	0	0	0	0.0424763	0	0	3.104	0	0	0	0	0	0	-1
292	82.81	11.9881	25.5198	0	1	1	1	0	0	1	0	0	0	0	0	0.0629538	0	0	3.24723	0	0	0	0	0	0	-1
293	99.61	11.1221	18.9432	0	1	0	1	9.51982	0	1	0	0	0	0	0	0.048025	0	0	2.33627	0	0	0	0	0	0	-1
294	72.5	12.0728	20.5068	0	1	0	1	0	56.1608	1	0	0	0	0	0	0.0372149	0	0	0	0	0	1	0	0	0	-1
295	101.22	10.7582	16.3718	0	1	0	0	0	0	1	0	0	0	0	0	0.0502149	0	0	2.99816	0	0	0	0	0	0	-1
296	52.02	0	7.7036	0	0	0	1	0	0	1	0	0	0	0	0	0.0420036	0	0	0	0	0	0	0	0	0	-1
298	77.98	11.3432	19.4601	0	1	0	1	0	76.7397	1	0	0	0	0	0	0.0452132	0	0	0	0	0	0	0	0	0	-1
300	71.78	10.456	20.1944	1	1	0	0	8.58008	0	1	0	0	1	0	0	0.0443013	0	0	0	0	0	1	0	0	0	-1
301	73.4	12.3617	37.7457	0	1	0	1	0	0	1	1	0	0	0	0	0.0557202	0	0	0	0	0	0	0	0	0	-1
302	61.8	0	15.8368	0	1	0	0	9.96678	65.4095	1	0	0	0	0	0	0.0402839	0	1	0	0	0	0	0	0	0	-1
303	81.95	0	23.8239	0	1	1	0	9.74058	0	1	0	0	0	0	0	0.0565483	0	0	3.23003	0	0	0	0	0	0	-0.95
304	101.9	13.3329	54.8978	0	1	1	1	10.139	0	1	0	0	0	0	0	0.0746187	0	0	3.05149	0	0	0	0	0	0	-0.93
305	86.99	11.0425	11.9238	1	0	1	0	9.01369	34.2201	1	0	0	0	0	0	0.0331558	0	0	0	0	0	1	0	0	0	-0.92
306	106.95	12.4005	21.5731	0	1	0	1	0	84.542	1	0	5.19648	0	0	0	0.0414387	0	0	0	0	0	0	0	0	0	-0.9
307	113.6	12.0973	30.7493	0	1	0	1	0	0	1	0	0	0	0	0	0.0691229	0	0	2.07346	0	0	0	0	0	0	-0.9
308	91.67	11.7862	34.3557	0	1	0	0	9.3407	37.4146	0	0	0	0	0	1	0.0649261	0	0	0	0	0	0	0	0	0	-0.9
311	86.63	0	29.2172	0	1	0	1	9.22335	187.48	1	1	0	0	0	0	0.0441226	0	1	0	0	0	1	0	0	0	-0.85
312	107.2	12.0164	10.1421	0	1	0	1	0	0	1	1	0	0	0	0	0.0611406	0	0	2.30755	0	0	0	0	0	0	-0.85
313	206.07	12.5999	45.9821	0	1	1	0	9.516	0	1	0	0	0	0	1	0.0416685	0	0	0	0	0	2	0	0	0	-0.83
315	83.09	0	20.5332	0	1	0	0	0	51.7253	1	0	0	0	0	0	0.0610093	0	1	0	0	0	0	0	1	0	-0.82
316	135	0	15.8815	0	0	0	0	0	68.1379	1	0	0	0	2	0	0.0909482	0	0	2.4467	0	0	0	0	0	0	-0.8
318	83.09	11.8384	28.8352	0	1	1	1	0	0	1	0	0	0	0	0	0.0449077	0	0	2.96408	0	121.331	0	0	0	0	-0.8
320	103.78	10.4186	8.41069	1	0	1	0	8.53032	0	1	0	0	0	0	0	0.0493918	0	0	0	0	0	0	0	0	0	-0.8
322	110.6	11.5839	13.8481	0	0	0	1	9.08653	45.5924	1	0	0	0	0	0	0.0473235	0	0	0	0	0	0	0	0	0	-0.79
323	63.6	10.1574	7.00204	1	0	0	0	8.30739	0	0	0	0	0	0	0	0.0415101	0	0	0	0	0	0	0	0	0	-0.79
325	110.6	11.5839	13.8481	0	0	0	1	9.08653	45.5924	1	0	0	0	0	0	0.0473235	0	0	0	0	0	0	0	0	0	-0.79
326	63.04	12.2224	22.6928	0	1	0	0	0	75.041	1	0	0	0	0	0	0.0639249	0	0	2.86831	0	0	1	0	0	0	-0.78
327	103.78	10.4186	8.41069	1	0	1	0	8.53032	0	1	0	0	0	0	0	0.0493918	0	0	0	0	0	0	0	0	0	-0.77
328	75.01	11.422	24.2811	1	1	0	0	9.32005	0	1	0	0	0	0	0	0.0409863	0	0	0	0	0	1	0	0	0	-0.76
330	90.02	11.571	24.8328	0	1	0	0	0	192.207	1	1	5.79142	0	0	0	0.0586918	0	0	3.16303	0	0	0	0	0	0	-0.73
331	90.02	11.5603	22.4112	0	1	0	0	0	181.705	1	0	5.75668	0	0	0	0.0569694	0	0	3.14209	0	0	0	0	0	0	-0.73
332	44.2	0	22.5266	0	1	0	0	0	167.829	1	1	5.84334	0	0	0	0.0665529	0	0	3.51742	0	0	0	0	0	0	-0.73
334	134.63	11.2862	15.2899	0	0	0	1	9.16267	52.4019	1	0	0	0	0	0	0.0440217	0	0	2.18189	0	0	0	0	0	0	-0.72
337	42.35	0	24.0464	0	1	0	0	11.1935	0	1	0	0	0	0	0	0.0653046	0	0	0	0	0	0	0	0	0	-0.7
339	50.41	0	8.72188	0	0	0	0	0	0	1	0	0	0	1	0	0.0527572	0	0	2.9744	0	0	0	0	0	0	-0.7
340	74.22	11.9698	49.508	0	1	0	0	9.79109	0	0	0	0	0	0	0	0.130976	0	0	0	0	0	0	0	0	0	-0.7
341	104.7	12.8112	54.1802	0	1	0	1	0	531.746	1	0	0	0	0	0	0.052905	0	0	0	0	0	0	0	0	0	-0.7
342	76.88	12.7526	31.2713	0	1	0	1	0	0	1	1	0	0	0	0	0.0563888	0	0	0	0	0	0	0	0	0	-0.7
343	50.16	12.7409	22.1611	0	0	0	1	0	45.2242	1	0	0	0	0	0	0.0606801	0	0	3.24835	0	0	0	0	0	0	-0.69
344	111.96	12.6845	34.9219	0	1	0	1	0	0	1	1	0	0	0	0	0.0670994	0	0	2.66958	0	0	0	0	0	0	-0.67
345	84.39	12.9566	32.71	0	1	0	1	9.93104	70.3036	1	0	5.32918	1	0	0	0.0526195	0	0	0	0	0	0	0	0	0	-0.67
346	143.72	10.7867	12.8065	0	0	1	1	8.89682	93.3254	1	0	0	0	0	0	0.0374167	0	0	0	0	0	0	0	0	0	-0.67
348	86.53	10.7211	15.945	0	1	0	0	0	63.3242	1	1	0	0	0	0	0.0787225	1	0	3.0253	0	0	0	0	0	0	-0.67
350	72.19	10.9668	11.5463	1	0	0	0	8.96593	0	1	0	0	0	0	0	0.0381145	0	0	0	0	0	1	0	0	0	-0.66
351	86.53	10.6888	12.4236	0	1	0	0	0	60.1992	1	1	0	0	0	0	0.0666864	0	0	3.0224	0	0	0	0	0	0	-0.66
353	36.42	0	9.25051	0	0	0	0	0	37.0637	1	0	0	0	1	0	0.0556224	0	0	3.12715	0	0	0	0	0	0	-0.65
354	104.7	12.8015	52.2427	0	1	0	1	0	513.322	1	0	0	0	0	0	0.0478369	0	0	0	1	0	0	0	0	0	-0.64
355	72.74	0	33.6843	0	1	0	0	0	0	1	0	0	0	0	0	0.0590545	0	0	3.50165	0	0	0	0	0	0	-0.64
357	70.89	12.2254	40.4384	0	1	1	1	0	237.27	1	1	0	0	0	0	0.0603146	0	0	0	0	0	0	0	0	0	-0.63
358	55.56	13.1956	30.5087	0	1	0	1	0	179.727	1	0	0	0	0	0	0.0559768	0	0	0	0	0	0	0	0	0	-0.62
359	55.56	13.1956	30.5087	0	1	0	1	0	179.727	1	0	0	0	0	0	0.0559768	0	0	0	0	0	0	0	0	0	-0.62
360	84.32	11.168	13.9207	0	0	0	1	8.85893	44.9924	1	0	0	0	0	0	0.0434183	0	0	2.11852	0	0	0	0	0	0	-0.6
361	49.87	0	2.946	0	0	0	0	0	0	0	0	0	0	0	0	0	0	0	0	0	0	0	0	0	0	-0.6
362	53.09	12.5656	31.0888	0	1	0	1	0	117.385	1	1	0	1	0	0	0.0557214	0	0	0	0	0	0	0	0	0	-0.6
364	97.98	13.5888	62.1348	0	1	1	1	0	235.696	1	1	0	0	0	0	0.0511311	1	0	3.13329	0	0	0	0	0	0	-0.59
365	66.56	11.8058	12.8587	0	0	0	1	10.3089	0	1	0	0	0	0	0	0.0433896	0	0	0	0	35.4318	0	0	0	0	-0.59
366	131.27	11.9818	45.1536	0	1	0	1	0	0	1	0	0	0	0	0	0.070665	0	0	2.87094	0	0	1	1	0	0	-0.57
367	131.19	12.5743	37.832	0	1	1	1	11.1966	128.637	1	0	0	0	0	0	0.0745708	0	0	2.7448	0	0	0	0	0	0	-0.56
368	131.19	12.5743	37.832	0	1	1	1	11.1966	128.637	1	0	0	0	0	0	0.0745708	0	0	2.7448	0	0	0	0	0	0	-0.56
370	43.86	12.3034	32.42	0	1	0	1	0	95.79	1	0	0	1	0	0	0.0591697	1	0	0	0	0	1	0	0	0	-0.55
371	70.59	10.8576	15.4942	0	1	0	1	9.68842	0	1	1	0	0	0	0	0.0541052	0	0	2.67575	0	0	0	0	0	0	-0.55
372	63.32	10.2945	10.4401	1	0	0	0	8.47234	0	1	0	0	0	0	0	0.106955	0	0	0	0	0	0	0	0	0	-0.54
373	35.58	12.2844	20.0789	0	1	0	1	0	46.9571	1	0	0	0	0	0	0.0460214	0	0	3.547	0	0	0	0	0	0	-0.54
374	58.2	12.1796	21.4966	0	1	0	1	0	0	1	0	0	0	0	0	0.0496789	0	0	2.98776	0	0	0	0	0	0	-0.52
375	115.04	10.5192	7.96618	0	0	0	1	0	37.7857	1	0	0	0	0	0	0.0866073	0	0	2.28324	0	0	0	0	0	0	-0.52
376	53.17	12.5406	23.6128	0	1	0	0	0	137.739	1	0	0	0	0	0	0.0764401	0	0	0	0	0	0	0	0	0	-0.52
377	70.67	12.8697	27.3234	0	1	0	1	0	0	1	0	0	1	0	0	0.0705184	1	0	2.43579	0	0	0	0	0	0	-0.52
379	47.16	12.8724	17.988	0	0	0	1	10.674	63.2135	1	0	0	0	0	0	0.0405675	0	0	0	0	0	0	0	0	0	-0.52
382	74.6	11.8863	36.3897	0	1	0	0	9.36705	35.7918	0	0	0	0	0	0	0.0755289	0	0	0	0	0	0	0	0	0	-0.5
384	37.3	10.534	23.9114	1	1	0	0	8.65283	0	0	0	0	0	0	0	0.0798676	0	0	0	0	0	0	0	0	0	-0.49
385	84.32	11.1597	11.5914	0	0	0	1	8.87727	41.6924	1	0	0	0	0	0	0.0401614	0	0	2.19225	0	0	0	0	0	0	-0.48
386	31.23	0	17.3793	0	1	0	0	0	0	1	0	0	0	0	0	0.0696481	0	0	0	0	0	0	0	1	0	-0.48
387	51.02	13.0262	19.687	0	0	0	1	0	37.3189	1	0	0	0	0	0	0.0491845	0	0	0	0	0	0	0	0	0	-0.47
390	41.57	10.7541	18.5124	0	1	0	1	0	0	1	1	0	0	0	0	0.0732208	0	0	2.77174	0	0	0	0	0	0	-0.46
392	74.27	12.1143	26.0363	0	1	0	1	9.28246	0	1	0	0	1	0	0	0.0501923	0	0	2.88556	0	0	0	0	0	0	-0.45
393	74.27	12.1143	26.0363	0	1	0	1	9.28246	0	1	0	0	1	0	0	0.0501923	0	0	2.88556	0	0	0	0	0	0	-0.45
394	86.63	10.1428	7.11531	1	0	0	1	8.30135	0	1	0	0	0	0	0	0.0416711	0	0	2.14074	0	0	0	0	0	0	-0.44
396	43.86	12.3365	34.9219	0	1	0	1	0	99.39	1	0	0	1	0	0	0.0587527	1	0	0	0	0	1	0	0	0	-0.43
403	117.69	10.5772	12.068	2	0	0	0	8.57441	36.0143	0	0	0	0	0	0	0.0419134	0	0	0	0	0	0	0	0	0	-0.41
404	23.79	0	0.815714	0	0	0	0	0	0	0	0	0	0	0	0	0	0	0	0	0	0	0	0	0	0	-0.4
405	74.68	10.7409	15.6408	0	1	0	1	8.79629	0	1	0	0	0	0	0	0.0969584	0	0	0	0	0	0	0	0	0	-0.4
406	80.39	9.89014	4.77749	0	0	0	0	8.06542	0	0	0	0	0	0	0	0.199301	0	0	0	0	0	0	0	0	0	-0.4
408	136.03	12.5071	33.2856	0	1	1	1	9.84432	72.8456	1	0	0	0	0	0	0.0385771	0	0	3.16441	0	0	0	0	0	0	-0.39
409	63.69	11.5631	28.9226	0	1	0	1	0	0	1	0	0	0	0	0	0.0546347	0	0	2.90499	0	0	0	0	0	0	-0.39
410	42.08	11.4951	10.765	0	0	0	0	0	0	0	0	0	0	0	0	0.0465208	0	0	0	0	0	0	0	1	0	-0.38
411	29.54	13.7768	57.4102	0	1	0	1	0	0	1	0	0	0	0	0	0.0707934	0	0	0	1	0	0	0	0	0	-0.37
412	36.26	0	20.2875	0	0	0	0	0	50.8803	1	0	0	1	0	0	0.0508763	0	0	0	0	0	0	0	0	0	-0.37
413	83.56	12.7612	36.4041	0	1	0	1	0	102.985	1	0	0	0	0	0	0.072011	0	0	3.64076	0	0	0	0	0	0	-0.37
414	67.35	12.1255	18.1602	0	0	0	1	0	0	1	0	0	0	0	0	0.0599187	0	0	3.24816	0	0	0	0	0	0	-0.37
415	23.55	12.069	23.3679	0	1	0	0	0	0	1	0	0	0	0	0	0.0877354	0	0	0	0	0	0	0	0	0	-0.36
416	46.33	11.9941	16.2697	0	0	0	1	0	0	1	0	0	0	0	0	0.0477859	0	0	0	0	38.1016	0	0	0	0	-0.34
417	55.62	11.9355	12.9054	0	0	0	1	0	0	1	0	0	0	0	0	0.0441542	0	0	0	0	32.418	0	0	0	0	-0.34
418	46.33	11.9023	13.0323	0	0	0	1	0	0	1	0	0	0	0	0	0.0452605	0	0	0	0	32.418	0	0	0	0	-0.34
419	51.27	12.9304	31.5474	0	1	0	1	0	66.8979	1	0	5.58944	1	0	0	0.0559876	0	0	0	0	0	0	0	0	0	-0.32
421	58.86	11.8614	12.0452	0	0	0	1	0	0	1	0	0	0	0	0	0.0396741	0	0	0	0	32.418	0	0	0	0	-0.3
422	40.46	0	24.9062	0	1	0	0	9.66232	28.7057	0	0	0	0	0	0	0.0706714	0	0	0	0	0	0	0	0	0	-0.3
424	77.05	12.7231	21.117	0	1	1	1	0	90.8977	1	0	5.29666	0	0	0	0.0379281	0	1	0	1	51.6435	0	0	0	0	-0.3
426	199.95	12.3781	60.9822	1	1	1	1	9.52169	0	1	1	0	0	0	0	0.0788847	0	0	2.55649	0	0	0	1	0	0	-0.3
427	199.95	12.3781	60.9822	1	1	1	1	9.52169	0	1	1	0	0	0	0	0.0788847	0	0	2.55649	0	0	0	1	0	0	-0.3
428	67.22	11.1397	8.34441	0	0	0	1	0	21.9123	0	0	0	0	0	0	0.0381636	0	0	2.24106	0	0	0	0	0	0	-0.3
430	72.68	11.1212	6.99131	0	0	0	1	0	21.9123	0	0	0	0	0	0	0.0331957	0	1	2.1994	0	0	0	0	0	0	-0.3
431	61.36	11.8423	16.7657	0	1	0	1	9.57935	0	1	0	0	1	0	0	0.0429479	0	0	2.18168	0	0	0	0	0	0	-0.3
432	0	0	0	0	0	0	0	0	0	0	0	0	0	0	0	0	0	0	0	0	0	0	0	0	0	-0.3
434	81.42	12.182	22.6946	0	1	0	1	10.9164	25.9525	1	0	0	0	0	0	0.0561508	0	0	0	0	0	0	0	0	0	-0.29
435	78.43	11.0264	14.6351	0	0	1	1	9.8917	0	1	0	0	0	0	0	0.0720287	0	0	2.37246	0	0	0	0	0	0	-0.28
436	0	0	2.92799	0	0	0	0	0	0	0	0	0	0	0	0	0	0	0	0	0	0	0	0	0	0	-0.28
437	89.77	11.0186	16.1733	0	1	0	0	0	71.7172	1	0	0	0	0	0	0.0434958	0	0	3.05761	0	0	0	0	0	0	-0.28
438	36.42	0	12.8114	0	0	0	0	0	39.488	1	0	0	0	1	0	0.0704303	0	0	3.20129	0	0	0	0	0	0	-0.28
439	49.87	0	4.50542	0	0	0	0	0	0	0	0	0	0	0	0	0.148532	0	0	0	0	0	0	0	0	0	-0.27
440	90.02	10.9789	15.6371	0	1	0	0	0	136.422	1	0	5.8472	0	0	0	0.0413177	0	0	3.03591	0	0	0	0	0	0	-0.27
442	58.2	11.375	11.288	0	0	0	1	0	29.0762	0	0	0	0	0	0	0.0627	0	0	2.71079	0	0	0	0	0	0	-0.26
443	43.86	12.3106	32.1547	0	1	0	1	0	182.487	1	0	0	0	0	0	0.0715155	0	0	0	0	0	1	0	0	0	-0.25
445	64.43	12.3452	20.4653	0	1	0	1	0	74.0998	1	0	0	0	0	0	0.0481826	0	1	0	0	48.6231	0	0	0	0	-0.25
446	111.96	12.9275	45.8769	0	1	0	1	0	0	1	1	0	0	0	0	0.0685491	0	0	2.69903	0	0	0	0	0	0	-0.24
447	41.57	11.955	21.6123	0	1	0	1	0	0	1	1	0	0	0	0	0.0653008	0	0	2.92517	0	0	0	0	0	0	-0.24
448	63.64	10.2745	6.11946	0	0	0	0	0	34.3405	1	0	0	0	0	0	0.0418074	0	1	0	0	0	0	0	0	0	-0.24
449	20.23	0	1.2393	0	0	0	0	7.63889	0	0	0	0	0	0	0	0	0	0	0	0	0	0	0	0	0	-0.23
451	72.42	12.2057	22.1051	0	1	0	1	10.1052	53.1277	1	0	0	0	0	1	0.038412	0	0	0	0	0	1	0	0	0	-0.23
452	75.27	10.8646	10.5011	0	0	0	1	0	0	1	0	0	0	0	0	0.0449057	0	0	2.06486	0	0	0	0	0	0	-0.22
453	32.26	0	27.3981	0	0	0	0	0	52.7473	1	0	0	0	0	0	0.0532141	0	0	0	0	0	0	0	0	0	-0.22
454	85.61	12.4511	18.512	0	0	0	1	0	0	1	0	0	0	0	0	0.0546381	0	0	2.97417	0	0	0	0	0	0	-0.22
456	94.83	11.8954	38.5846	0	1	0	0	9.37226	37.4146	0	0	0	0	0	1	0.0713825	0	0	0	0	0	0	0	0	0	-0.22
459	81.65	0	15.3315	0	0	0	0	10.9583	134.102	1	0	0	0	0	1	0.0395082	0	0	0	0	0	0	0	0	0	-0.22
460	45.59	0	22.4878	0	1	0	0	11.1519	0	1	0	0	0	0	0	0.0584777	0	0	0	0	0	0	0	0	0	-0.21
462	36.42	0	8.0243	0	0	0	0	0	35.3102	1	0	0	0	1	0	0.0403665	0	0	2.86507	0	0	0	0	0	0	-0.2
463	59.39	12.665	27.7549	0	1	0	1	0	195.546	1	0	0	0	0	0	0.0530578	0	0	3.03633	0	0	0	0	0	0	-0.2
465	43.95	0	20.6904	0	0	0	0	0	60.3601	1	0	0	0	0	0	0.0832346	0	1	3.57537	0	0	0	0	0	0	-0.2
466	72.19	11.1776	9.62344	0	0	0	1	0	0	1	0	0	0	0	0	0.0488082	0	0	2.58567	0	0	0	0	0	0	-0.19
468	90.65	10.5244	15.2397	0	1	1	1	0	0	1	0	0	0	0	0	0.0792273	0	0	2.35093	0	0	0	0	0	0	-0.18
469	94.83	11.8086	36.2768	0	1	0	0	9.36312	37.4146	0	0	0	0	0	1	0.0678366	0	0	0	0	0	0	0	0	0	-0.18
470	0	0	0.954154	0	0	0	0	0	0	0	0	0	0	0	0	0	0	0	0	0	0	0	0	0	0	-0.17
471	60.85	12.8924	24.9212	0	1	0	1	9.59041	71.2676	1	0	0	0	0	0	0.0961117	0	0	0	0	0	0	0	0	0	-0.17
472	64.63	11.6144	20.0662	0	1	1	0	0	0	1	0	0	1	0	0	0.0478609	0	0	2.88615	0	0	0	0	0	0	-0.17
473	36.47	0	4.53577	0	0	0	0	8.20024	0	1	0	0	0	0	0	0.0529226	0	0	0	0	0	0	0	0	0	-0.17
474	63.64	10.5767	13.3093	0	1	0	0	0	55.5461	1	0	0	1	0	0	0.0665998	0	1	0	0	0	0	0	0	0	-0.17
475	65.78	11.2436	21.0004	1	1	0	0	9.17772	0	1	0	0	0	0	0	0.0449717	0	0	0	0	0	1	0	0	0	-0.16
476	61.42	0	15.42	0	0	0	0	0	114.448	1	0	0	0	0	0	0.0411221	0	0	0	1	0	0	0	0	0	-0.16
477	41.62	0	13.0907	0	0	0	0	0	21.0263	1	0	0	0	1	0	0.0462795	0	0	0	0	26.8422	0	0	0	0	-0.16
478	0	0	0	0	0	0	0	0	0	0	0	0	0	0	0	0	0	0	0	0	0	0	0	0	0	-0.16
479	87.66	11.6532	23.2316	0	1	0	1	9.89204	0	1	1	0	0	0	0	0.051898	0	0	2.75686	0	0	1	0	0	0	-0.15
480	67.43	11.8565	23.0252	0	1	0	0	0	0	1	0	0	0	0	0	0.0692546	0	0	3.59635	0	0	0	0	0	0	-0.15
481	70.67	12.321	10.2618	0	1	0	0	9.24583	0	0	0	0	0	0	0	0.0376394	0	0	0	0	0	1	0	0	0	-0.15
482	17.07	10.4568	5.41772	0	0	0	0	0	27.8048	0	0	0	0	0	0	0.0925844	0	0	0	0	0	0	0	0	0	-0.14
483	40.19	0	12.7505	0	0	0	0	0	0	1	0	0	0	0	0	0.0556934	0	0	3.35486	0	0	0	0	0	0	-0.14
485	64.43	12.0666	18.9599	0	1	0	1	0	38.8016	1	0	0	1	0	0	0.0374665	0	1	0	0	51.115	0	0	0	0	-0.14
486	0	0	2.5691	0	0	0	0	0	0	0	0	0	0	0	0	0	0	0	0	0	0	0	0	0	0	-0.14
487	54.71	11.91	26.3314	0	1	0	0	0	73.1582	1	0	0	0	0	0	0.0533148	0	0	3.54846	0	0	0	0	0	0	-0.14
490	40.46	0	11.9542	0	1	0	0	9.2963	0	0	0	0	0	0	0	0.0534128	0	0	0	0	0	0	0	0	0	-0.12
491	86.53	11.4999	19.2281	0	1	0	0	0	81.4942	1	1	0	0	0	0	0.060166	0	0	3.14859	0	0	0	0	0	0	-0.12
492	66.48	11.4549	17.5388	0	1	0	1	0	0	1	0	0	0	0	0	0.0462126	0	0	2.20419	0	0	0	0	0	0	-0.1
493	34.14	11.8579	33.7017	0	1	0	0	0	32.3655	0	0	0	0	0	0	0.0830702	0	0	0	0	0	0	0	0	0	-0.1
494	64.43	11.9532	17.435	0	1	0	1	0	36.8304	1	0	0	1	0	0	0.0362024	0	1	0	0	47.9103	0	0	0	0	-0.1
497	60.44	11.5125	14.3168	0	1	1	0	0	61.8563	0	0	0	0	0	0	0.0528209	0	0	0	0	0	0	0	0	0	-0.1
498	26.93	11.9455	12.2806	0	0	0	1	0	38.7532	1	0	0	0	0	0	0.0528314	0	0	0	0	0	0	0	0	0	-0.1
499	25.78	0	7.00408	0	0	0	0	0	0	0	0	0	0	0	0	0.0516701	0	0	0	0	0	0	0	0	0	-0.1
500	0	0	3.88164	0	0	0	0	0	0	0	0	0	0	0	0	0	0	0	0	0	0	0	0	0	0	-0.1
501	65.64	13.3728	33.2872	0	1	0	1	0	186.819	1	1	0	0	0	0	0.0775411	0	0	0	0	0	0	0	0	0	-0.1
502	50.41	0	17.7494	0	1	0	0	9.57473	39.3074	1	0	0	0	0	0	0.0397576	0	1	0	0	47.9021	1	0	0	0	-0.1
503	64.43	12.7439	28.3352	0	1	0	1	0	71.7868	1	0	0	0	0	0	0.0460887	0	1	0	0	45.9643	0	0	0	0	-0.09
505	64.43	12.7328	27.939	0	1	0	1	0	72.7767	1	0	0	0	0	0	0.045016	0	1	0	0	46.5775	0	0	0	0	-0.09
506	47.86	0	20.2444	0	1	0	1	10.6469	39.0804	1	0	0	0	0	0	0.0410881	0	0	2.93028	0	47.5429	1	0	0	0	-0.07
507	58.2	11.9862	11.3919	0	0	0	1	0	0	1	0	0	0	0	0	0.0492963	0	0	2.68187	0	0	0	0	0	0	-0.07
509	40.16	0	24.0213	0	1	0	0	0	0	1	0	0	0	0	0	0.0501863	0	0	0	0	0	0	0	0	0	-0.07
511	66.48	11.4909	19.8509	0	1	0	1	0	0	1	0	0	0	0	0	0.0561145	0	0	2.27197	0	0	0	0	0	0	-0.06
513	49.77	12.3624	19.9911	0	1	0	0	9.52867	52.1951	1	0	0	0	0	0	0.067374	0	0	0	0	72.0223	0	0	0	0	-0.06
514	52.32	10.8388	6.57378	0	0	0	1	0	0	1	0	0	0	0	0	0.0453128	0	0	0	0	0	0	0	0	0	-0.05
515	26.93	11.578	9.60861	0	0	0	1	0	38.7532	1	0	0	0	0	0	0.0383921	0	0	0	0	0	0	0	0	0	-0.05
516	26.93	11.5946	9.41856	0	0	0	1	0	39.5365	1	0	0	0	0	0	0.0400413	0	0	0	0	0	0	0	0	0	-0.05
519	34.03	11.7289	14.7713	0	0	0	1	0	0	1	0	0	0	0	0	0.0704229	0	0	3.44564	0	0	0	0	0	0	-0.05
520	68.18	12.6526	30.871	0	1	0	1	0	98.1625	1	1	0	0	0	0	0.0483998	0	0	2.89012	1	0	0	0	0	0	-0.05
521	74.31	0	39.4526	0	1	0	0	10.94	150.995	1	0	0	0	0	1	0.0542212	0	1	0	0	0	0	0	0	0	-0.05
523	85.24	11.0949	12.462	0	1	0	1	0	33.9565	1	0	0	0	0	0	0.0396627	0	0	2.15015	0	0	0	0	0	0	-0.05
525	77.29	0	5.90627	0	0	0	0	0	26.9857	1	0	0	0	1	0	0.0741764	0	0	0	0	0	0	0	0	0	-0.04
526	0	0	0	0	0	0	0	0	0	0	0	0	0	0	0	0	0	0	0	0	0	0	0	0	0	-0.04
527	38.69	0	4.17176	0	0	0	0	8.96083	15.581	0	0	0	0	0	0	0.0368844	0	0	0	0	0	0	0	0	0	-0.04
528	43.6	0	6.82433	0	0	0	0	0	14.1373	1	0	0	0	0	0	0.058975	0	0	0	0	20.3817	0	0	0	0	-0.03
529	50.41	0	18.4509	0	0	0	1	10.515	38.581	1	0	0	0	0	0	0.0388675	0	1	0	0	48.0629	1	0	0	0	-0.03
531	20.23	0	3.42344	0	0	0	0	8.06625	0	0	0	0	0	0	0	0.158114	0	0	0	0	0	0	0	0	0	-0.02
532	0	0	2.23864	0	0	0	0	0	0	0	0	0	0	0	0	0	0	0	0	0	0	0	0	0	0	-0.02
533	54.46	12.1355	18.4309	0	1	0	1	0	0	1	0	0	0	0	0	0.0618802	0	0	3.35927	0	0	0	0	0	0	-0.02
534	32.7	0	15.2847	0	0	0	0	8.72854	0	1	0	0	0	0	0	0.0716336	0	0	0	0	0	0	0	0	0	-0.02
535	47.1	11.7749	55.5473	0	1	0	1	0	0	1	1	0	1	0	0	0.0553138	0	0	0	0	0	0	0	0	0	-0.01
536	72.83	11.6992	43.6001	0	1	0	0	9.91769	0	0	0	0	0	0	0	0.067723	0	0	0	0	0	0	0	0	0	-0.01
538	43.86	12.3649	37.0893	0	1	0	1	0	103.199	1	0	0	1	0	0	0.0596635	1	0	0	0	0	1	0	0	0	-0.01
539	73.49	12.9534	22.743	0	1	0	1	0	62.8277	1	1	0	0	0	0	0.0470389	0	0	3.35753	0	0	0	0	0	0	-0.01
540	83.87	10.2995	7.05031	0	0	0	0	8.88974	38.15	1	0	0	0	0	0	0.0387682	0	1	0	0	0	0	0	0	0	-0.01
541	93.1	10.4277	8.89522	0	0	0	0	9.29543	46.4111	1	0	0	0	0	0	0.0413907	0	1	0	0	0	0	0	0	0	-0.01
542	57.68	0	19.2608	0	0	0	0	0	0	1	0	0	0	1	0	0.0635173	0	0	3.26957	0	0	0	0	0	0	-0.01
543	43.07	0	15.4919	0	0	0	0	0	35.2808	1	0	0	0	0	0	0.0411772	0	0	0	0	43.2816	1	0	0	0	0
546	37.3	11.7873	30.1794	0	1	0	0	10.4492	28.7283	0	0	0	0	0	0	0.0826807	0	0	0	0	0	0	0	0	0	0
547	29.46	0	28.3578	0	0	0	0	10.6798	0	0	0	0	0	0	0	0.0614669	0	0	0	0	0	0	0	0	0	0
548	26.3	9.82153	3.27049	0	0	0	0	0	0	0	0	0	0	0	0	0.101632	0	0	0	0	0	0	0	0	0	0
549	23.47	0	20.7095	0	0	0	0	9.91396	0	1	0	0	0	0	0	0.0691297	0	0	0	0	0	0	0	0	0	0
550	23.47	0	20.7095	0	0	0	0	9.91396	0	1	0	0	0	0	0	0.0691297	0	0	0	0	0	0	0	0	0	0
551	55.4	11.5828	16.2338	0	1	0	0	0	0	1	0	0	0	0	0	0.0549495	0	0	3.17591	0	0	0	0	0	0	0
552	30.17	12.353	12.7379	0	0	0	1	0	45.9532	1	0	0	0	0	0	0.0431066	0	0	0	0	0	0	0	0	0	0
554	43.09	11.827	11.0121	0	0	0	1	0	0	1	0	0	0	0	0	0.0463843	0	0	0	0	32.7619	0	0	0	0	0
557	20.23	0	0.544331	0	0	0	0	7	0	0	0	0	0	0	0	0	0	0	0	0	0	0	0	0	0	0.02
559	0	0	0	0	0	0	0	0	0	0	0	0	0	0	0	0	0	0	0	0	0	0	0	0	0	0.03
560	53.47	8.11111	0.393743	0	0	0	1	0	0	0	0	0	0	0	0	0	0	0	0	0	0	0	0	0	0	0.03
561	52.04	0	0.8	0	0	0	0	0	0	0	0	0	0	0	0	0	0	0	0	0	0	0	0	0	0	0.03
562	20.23	0	4.94045	0	0	0	0	8.23667	0	0	0	0	0	0	0	0.129099	0	0	0	0	0	0	0	0	0	0.04
563	20.23	0	4.94418	0	0	0	0	8.33477	0	0	0	0	0	0	0	0.129099	0	0	0	0	0	0	0	0	0	0.04
564	63.32	10.8094	10.4693	0	0	0	1	10.1609	0	1	0	0	0	0	1	0.0587124	0	0	0	0	0	0	0	0	0	0.04
566	58.2	10.9723	15.6916	0	0	0	1	0	0	1	0	0	0	0	0	0.0681061	0	0	2.35587	0	0	0	0	0	0	0.04
567	20.08	0	9.76768	0	0	0	0	0	0	1	0	0	0	0	0	0.0536528	0	0	0	0	0	0	0	1	0	0.05
568	20.08	0	9.76768	0	0	0	0	0	0	1	0	0	0	0	0	0.0536528	0	0	0	0	0	0	0	1	0	0.05
569	55.56	11.6326	12.8514	0	0	0	0	0	0	1	1	0	0	0	0	0.0629088	0	0	0	0	0	0	0	0	0	0.05
571	65.01	11.1484	8.26446	0	0	0	1	0	22.7278	1	0	0	0	0	0	0.0393213	0	0	2.56338	0	0	0	0	0	0	0.06
572	65.01	11.1554	8.22003	0	0	0	1	0	22.7278	1	0	0	0	0	0	0.0405494	0	0	2.61546	0	0	0	0	0	0	0.06
574	52.65	12.2645	30.1719	0	1	0	1	0	92.49	1	0	0	1	0	0	0.059493	1	0	3.02371	0	0	1	0	0	0	0.07
575	103.17	12.8058	42.1563	0	1	0	1	0	0	1	1	0	0	0	0	0.0693837	0	0	2.69117	0	0	0	0	0	0	0.08
576	44.81	11.3534	18.1241	0	1	0	1	0	66.943	1	0	0	0	0	0	0.0539529	0	0	2.47303	0	0	0	0	0	1	0.08
577	102.29	10.8185	32.5446	1	1	1	0	8.88425	0	0	0	0	0	0	0	0.0526548	0	0	0	0	0	1	0	0	0	0.08
578	119.68	11.2873	30.6472	0	1	1	0	0	0	1	0	0	0	0	0	0.0434589	0	0	3.03443	0	0	0	0	0	0	0.08
579	0	0	4.99674	0	0	0	0	0	0	0	0	0	0	0	0	0	0	0	0	0	0	0	0	0	0	0.08
580	75.27	10.828	12.0006	0	0	0	1	0	0	1	0	0	0	0	0	0.055858	0	0	2.12653	0	0	0	0	0	0	0.09
582	55.56	12.2481	18.7586	0	1	0	0	0	0	1	1	0	0	0	0	0.064494	0	0	0	1	0	1	0	0	0	0.09
583	48.91	13.1598	26.2592	0	1	0	1	0	0	1	0	0	1	0	0	0.0509957	0	0	0	0	0	0	0	0	0	0.09
584	78.49	11.0397	14.7668	0	1	1	1	0	0	1	0	0	0	0	0	0.039294	0	0	0	0	58.9225	1	0	0	0	0.1
585	72.68	11.1212	6.93956	0	0	0	1	0	22.7278	1	0	0	0	0	0	0.0327056	0	1	2.49509	0	0	0	0	0	0	0.1
586	44.81	11.3534	18.1241	0	1	0	1	0	66.943	1	0	0	0	0	0	0.0539529	0	0	2.47303	0	0	0	0	0	1	0.1
587	77.76	10.3029	4.79317	0	0	0	0	8.41898	0	0	0	0	0	0	0	0.0365962	0	0	0	0	0	0	0	0	0	0.1
588	3.24	0	19.108	0	0	0	0	0	0	1	0	0	0	0	0	0.0556062	0	0	0	0	0	0	0	0	0	0.1
589	42.35	0	24.0464	0	1	0	0	11.1935	0	1	0	0	0	0	0	0.0653046	0	0	0	0	0	0	0	0	0	0.1
590	9.23	0	4.36763	0	0	0	0	0	0	0	0	0	0	0	0	0.0383542	0	0	0	0	0	0	0	0	0	0.1
592	46.53	10.9162	11.0968	1	0	0	0	8.96968	0	0	0	0	0	0	0	0.0468733	0	0	0	0	0	0	0	0	0	0.1
594	20.23	0	4.22848	0	0	0	0	8.52083	0	0	0	0	0	0	1	0	0	0	0	0	0	0	0	0	0	0.11
597	37.91	12.9086	17.9198	0	0	0	1	0	22.5441	1	0	0	0	0	0	0.0479969	0	0	3.64479	0	0	0	0	0	0	0.11
599	36.42	0	9.17442	0	0	0	0	0	35.3102	1	0	0	0	0	0	0.0580811	0	0	3.10449	0	0	0	0	0	0	0.11
600	9.23	0	6.40145	0	0	0	0	0	0	0	0	0	0	0	0	0.0239238	0	0	0	0	0	0	0	0	0	0.11
601	43.84	0	9.82479	0	0	0	0	0	26.0134	1	0	0	0	0	0	0.047312	0	0	0	1	0	0	0	0	0	0.11
603	18.46	0	6.40879	0	0	0	0	0	0	0	0	0	0	0	0	0.0895762	0	0	0	0	0	0	0	0	0	0.12
604	9.23	0	2.81812	0	0	0	0	0	0	0	0	0	0	0	0	0.0349174	0	0	0	0	0	0	0	0	0	0.13
606	45.48	11.8626	23.6322	0	1	0	0	0	0	1	0	0	0	0	0	0.0551948	0	0	3.53108	0	0	0	0	0	0	0.13
609	0	0	5.74375	0	0	0	0	0	0	0	0	0	0	0	0	0.0685651	0	0	0	0	0	0	0	0	0	0.16
610	36.42	0	9.16658	0	0	0	0	0	37.0637	1	0	0	0	1	0	0.057096	0	0	3.08465	0	0	0	0	0	0	0.16
612	9.23	0	6.62841	0	0	0	0	0	0	0	0	0	0	0	0	0.144338	0	0	0	0	0	0	0	0	0	0.17
613	0	0	6.28247	0	0	0	0	0	0	0	0	0	0	0	0	0.0478037	0	0	0	0	0	0	0	0	0	0.17
616	75.71	12.3514	22.1916	0	1	0	1	0	59.6002	1	0	0	0	0	0	0.066293	0	0	3.36183	0	0	0	0	0	0	0.18
617	75.27	10.8975	13.6173	0	0	0	1	0	0	1	0	0	0	0	0	0.0557305	0	0	2.15062	0	0	0	0	0	0	0.19
618	42.31	12.0871	26.6951	0	1	0	0	0	0	1	0	0	0	0	0	0.0761142	0	0	0	0	0	0	0	0	0	0.2
619	75.27	11.0667	16.1677	0	0	0	1	0	0	1	0	0	0	0	0	0.056217	0	0	2.16715	0	0	0	0	0	0	0.2
620	75.27	11.0667	16.1677	0	0	0	1	0	0	1	0	0	0	0	0	0.056217	0	0	2.16715	0	0	0	0	0	0	0.2
622	29.26	0	13.6557	0	0	0	0	0	0	1	0	0	1	0	0	0.0691379	0	0	0	0	0	0	0	0	0	0.2
623	41.93	0	18.6529	0	0	0	0	10.0559	19.7813	1	0	0	0	0	0	0.0495048	0	0	0	0	31.6082	0	0	0	0	0.2
624	50.7	0	15.8771	0	0	0	0	0	0	1	1	0	0	0	0	0.0435179	0	0	3.32296	1	0	0	0	0	0	0.2
625	9.23	0	7.14209	0	0	0	0	0	0	0	0	0	0	0	0	0.0277059	0	0	0	0	0	0	0	0	0	0.2
627	9.23	0	6.6985	0	0	0	0	0	0	0	0	0	0	0	0	0.144338	0	0	0	0	0	0	0	0	0	0.22
628	12.03	0	23.4849	0	0	0	0	0	43.1225	1	0	0	0	0	0	0.0791431	0	0	3.29578	0	0	0	0	0	0	0.22
629	12.47	0	22.3065	0	0	0	0	0	0	1	0	0	0	0	0	0.0688678	0	0	0	0	0	0	0	0	0	0.22
630	50.53	0	22.2583	0	1	0	1	0	65.06	1	1	5.65308	0	0	0	0.0557885	0	0	3.22147	0	0	0	0	0	0	0.22
631	62.3	12.4239	20.3229	0	1	0	0	9.55779	48.8418	1	0	0	0	0	0	0.0564827	0	0	0	0	68.3154	0	0	0	0	0.23
633	54.69	0	27.1907	0	0	0	0	0	172.683	1	1	0	0	0	0	0.0491791	0	1	3.5077	0	0	0	0	0	0	0.23
634	0	0	8.22088	0	0	0	0	0	0	0	0	0	0	0	0	0.0430578	0	0	0	0	0	0	0	0	0	0.23
636	76.89	0	28.1434	0	1	0	0	0	88.5941	1	1	0	1	0	0	0.0479589	0	0	3.5529	0	0	0	0	0	0	0.24
638	52.65	12.2439	26.3113	0	1	0	1	0	88.4066	1	0	0	1	0	0	0.0574353	0	0	3.02081	0	0	1	0	0	0	0.26
639	32.7	0	16.8435	0	1	0	0	9.67862	0	1	0	0	0	0	0	0.0618403	0	0	0	0	0	0	0	0	0	0.26
640	0	0	5.65911	0	0	0	0	0	0	0	0	0	0	0	0	0	0	0	0	0	0	0	0	0	0	0.27
642	52.32	11.0929	6.32435	0	0	0	0	0	0	1	0	0	0	0	0	0.0463128	0	0	0	0	0	0	0	0	0	0.27
644	26.3	10.0963	5.67103	0	0	0	0	0	0	0	0	0	0	0	0	0.0900588	0	0	0	0	0	0	0	0	0	0.28
645	23.96	0	21.736	0	0	0	0	0	32.9189	1	0	0	0	0	0	0.0541239	0	0	3.27592	0	45.4313	0	0	0	0	0.28
647	30.71	0	10.5231	0	0	0	0	0	46.0222	1	0	0	0	0	0	0.058127	0	0	0	1	0	0	0	0	0	0.28
648	78.01	11.2767	34.788	0	1	0	1	0	0	1	1	0	1	0	0	0.05962	0	0	2.6837	0	0	0	0	0	0	0.3
650	19.03	0	25.6459	0	0	0	0	0	30.3859	1	0	0	0	0	0	0.0697807	0	0	0	0	0	0	0	0	0	0.3
651	19.03	0	25.6459	0	0	0	0	0	30.3859	1	0	0	0	0	0	0.0697807	0	0	0	0	0	0	0	0	0	0.3
652	41.99	13.4668	23.2936	0	0	0	1	0	0	1	0	0	0	0	0	0.0465097	0	0	3.24422	0	0	0	0	0	0	0.3
653	50.28	0	16.7052	0	1	0	0	0	0	1	0	0	0	0	0	0.0546167	0	0	3.38282	0	0	0	0	0	0	0.3
654	59.39	12.7883	34.0568	0	1	0	1	0	220.388	1	1	0	0	0	0	0.0538143	0	0	2.92528	1	0	0	0	0	0	0.3
657	48.14	0	9.2791	0	0	0	0	0	30.8198	1	0	0	0	0	0	0.0522923	0	0	0	0	0	0	0	0	0	0.3
658	0	0	0.333333	0	0	0	0	0	0	0	0	0	0	0	0	0	0	0	0	0	0	0	0	0	0	0.3
660	41.93	0	20.744	0	0	0	0	9.97287	20.8096	1	0	0	0	0	0	0.0497234	0	0	0	0	33.4866	0	0	0	0	0.32
661	41.93	0	20.744	0	0	0	0	9.97287	20.8096	1	0	0	0	0	0	0.0497234	0	0	0	0	33.4866	0	0	0	0	0.32
662	46.18	0	29.2173	0	1	0	0	0	67.1383	1	0	0	0	0	0	0.0633263	0	0	3.69711	0	0	0	0	0	0	0.32
663	24.92	0	6.57267	0	0	0	0	0	25.5532	1	0	0	0	0	0	0.0674414	0	0	3.43287	0	0	0	0	0	0	0.32
664	38.77	12.6218	23.2261	0	0	0	0	0	19.302	1	0	0	0	0	0	0.0529978	0	0	0	0	0	0	0	0	0	0.32
665	38.88	0	24.7413	0	0	0	0	0	138.833	1	0	0	1	0	0	0.0482253	0	1	0	0	0	0	0	0	0	0.32
666	32.26	0	6.48871	0	0	0	0	9.49884	0	1	0	0	0	0	0	0.0566837	0	0	3.14069	0	0	0	0	0	0	0.32
667	24.92	0	6.57267	0	0	0	0	0	25.5532	1	0	0	0	0	0	0.0674414	0	0	3.43287	0	0	0	0	0	0	0.32
668	36.42	0	12.1569	0	0	0	0	0	35.3102	1	0	0	0	1	0	0.080465	0	0	3.15673	0	0	0	0	0	0	0.33
669	0	0	5.6501	0	0	0	0	0	0	0	0	0	0	0	0	0	0	0	0	0	0	0	0	0	0	0.33
670	32.34	11.8923	14.7598	0	0	0	1	0	0	1	0	0	0	0	0	0.0634786	0	0	2.99699	0	0	0	0	0	0	0.34
671	0	0	7.83118	0	0	0	0	0	0	0	0	0	0	0	0	0.119502	0	0	0	0	0	0	0	0	0	0.35
672	0	0	9.26757	0	0	0	0	0	0	0	0	0	0	0	0	0.12216	0	0	0	0	0	0	0	0	0	0.35
673	75.27	11	16.9158	0	1	0	1	0	0	1	0	0	0	0	0	0.0634817	0	0	2.18262	0	0	0	0	0	0	0.36
675	9.23	0	5.23739	0	0	0	0	0	0	0	0	0	0	0	0	0	0	0	0	0	0	0	0	0	0	0.36
676	46.18	0	23.7497	0	1	0	0	0	74.4941	1	1	0	0	0	0	0.0639292	0	0	3.68202	0	0	0	0	0	0	0.36
678	46.84	0	23.4429	0	0	0	0	0	118.611	1	0	0	1	0	0	0.0425081	0	0	0	1	0	0	0	0	0	0.36
679	48.99	12.4707	27.0416	0	1	0	1	0	74.7382	1	0	0	0	0	0	0.057825	0	0	2.95937	1	0	0	0	0	0	0.36
680	103.17	12.7308	36.9612	0	1	0	1	0	0	1	1	0	0	0	0	0.0676988	0	0	2.67872	0	0	0	0	0	0	0.37
681	24.5	0	30.267	0	1	0	0	0	0	1	0	0	0	0	0	0.0614107	0	0	3.99246	0	0	0	0	0	0	0.37
682	0	0	4.77935	0	0	0	0	0	0	0	0	0	0	0	0	0	0	0	0	0	0	0	0	0	0	0.37
685	55.43	12.4933	25.5	0	1	0	1	0	60.5423	1	0	0	0	0	0	0.0473138	0	0	0	0	0	1	0	0	0	0.38
687	42.52	0	22.3507	0	1	0	0	0	51.7342	1	0	0	0	0	0	0.0574739	0	0	3.67818	0	0	0	0	0	0	0.39
689	21.26	0	16.4823	0	0	0	0	0	0	1	0	0	0	0	0	0.0543038	0	0	3.5095	0	28.0201	0	0	0	0	0.39
690	29.85	0	18.2582	0	0	0	0	0	44.0041	1	0	0	1	0	0	0.0509935	0	1	3.47329	0	0	0	0	0	0	0.39
691	0	0	4.45078	0	0	0	0	0	0	0	0	0	0	0	0	0	0	0	0	0	0	0	0	0	0	0.4
692	0	0	4.20909	0	0	0	0	0	0	0	0	0	0	0	0	0.0662678	0	0	0	0	0	0	0	0	0	0.4
694	37.3	11.8018	29.4245	0	1	0	0	10.7461	30.2555	0	0	0	0	0	1	0.0785388	0	0	0	0	0	0	0	0	0	0.4
695	37.3	11.8529	32.9689	0	1	0	0	11.0054	31.9035	0	0	0	0	0	1	0.0771945	0	0	0	0	0	0	0	0	0	0.4
696	37.3	11.8529	32.9689	0	1	0	0	11.0054	31.9035	0	0	0	0	0	1	0.0771945	0	0	0	0	0	0	0	0	0	0.4
697	26.3	10.1847	6.98396	0	0	0	0	0	0	0	0	0	0	0	0	0.113592	0	0	0	0	0	0	0	0	0	0.4
698	42.52	0	28.7913	0	1	0	0	0	0	1	0	0	1	0	0	0.0548477	0	0	3.51086	0	0	0	0	0	0	0.41
700	36.42	0	12.5945	0	0	0	0	0	39.488	1	0	0	0	1	0	0.0754304	0	0	3.0588	0	0	0	0	0	0	0.41
701	52.32	11.3678	9.02639	0	0	0	0	0	0	1	0	0	0	0	0	0.050587	0	0	0	0	0	0	0	0	0	0.42
702	43.71	0	16.7683	0	1	0	0	0	0	1	0	0	0	0	0	0.0486741	0	0	0	0	0	1	0	0	0	0.42
703	0	0	7.44644	0	0	0	0	0	0	0	0	0	0	0	0	0.0670109	0	0	0	0	0	0	0	0	0	0.43
704	54.26	13.0411	22.7817	0	0	0	1	0	33.5259	1	0	0	0	0	0	0.0558819	0	0	0	0	69.9799	0	0	0	0	0.43
705	21.06	0	20.1318	0	0	0	0	0	46.3081	1	0	0	1	0	0	0.0531645	0	1	0	0	0	0	0	0	0	0.43
706	41.99	11.7015	10.0763	0	0	0	1	0	0	1	0	0	1	0	0	0.0400623	0	0	2.48291	0	0	0	0	0	0	0.44
707	37.39	0	19.9478	0	0	0	0	0	74.4647	1	1	0	0	0	0	0.0763405	0	0	3.29721	0	0	0	0	0	0	0.44
709	0	0	2.74149	0	0	0	0	0	0	0	0	0	0	0	0	0.0589122	0	0	0	0	0	0	0	0	0	0.45
710	29.54	12.3454	25.0563	0	0	0	0	0	0	1	0	0	0	0	0	0.0587066	0	0	0	0	0	0	0	0	0	0.46
712	24.5	0	41.0376	0	1	0	0	0	0	1	0	0	0	0	0	0.0612315	0	0	4.07113	0	0	0	0	0	0	0.46
713	36.42	0	11.2078	0	0	0	0	0	39.488	1	0	0	0	1	0	0.0639153	0	0	3.02099	0	0	0	0	0	0	0.47
715	46.18	0	24.3871	0	1	0	0	0	60.5161	1	0	0	0	0	0	0.064433	0	0	3.67888	0	0	0	0	0	0	0.48
717	26.79	12.9426	34.4464	0	1	0	1	0	0	1	0	0	0	0	0	0.0655042	0	0	0	0	0	0	0	0	0	0.48
718	54.34	13.0814	21.7324	0	0	0	1	0	51.7668	1	0	0	0	0	0	0.0639312	0	0	3.3099	0	0	0	0	0	0	0.48
719	28.68	0	5.81485	0	0	0	0	0	14.015	1	0	0	0	0	0	0.0405001	0	0	0	0	0	0	0	0	0	0.48
720	77.82	0	11.2365	0	0	0	0	0	0	1	0	0	0	0	0	0.0442665	0	0	0	0	0	0	0	0	0	0.49
721	59.32	0	22.8421	0	1	0	1	0	60.5161	1	0	5.61322	0	0	0	0.0528031	0	0	3.66221	0	0	0	0	0	0	0.49
722	19.37	0	15.6093	0	0	0	0	0	0	1	0	0	0	0	0	0.0521107	0	0	0	0	28.1286	0	0	0	0	0.5
724	41.46	11.6727	11.8537	0	0	0	1	0	0	1	0	0	0	0	0	0.044987	0	0	2.82498	0	44.3439	1	0	0	0	0.5
726	41.49	0	18.4016	0	0	0	0	11.4409	0	1	0	0	0	0	1	0.0489366	0	0	3.41254	0	29.7906	0	0	0	0	0.52
728	35.5	0	16.9288	0	0	0	0	9.7689	0	1	0	0	0	0	0	0.0539472	0	0	3.21329	0	43.1726	0	0	0	0	0.53
729	52.32	11.2518	7.6424	0	0	0	0	0	0	1	0	0	0	0	0	0.0472261	0	0	0	0	0	0	0	0	0	0.55
730	29.26	0	15.0452	0	0	0	0	0	0	1	0	0	1	0	0	0.0706617	0	0	0	0	0	0	0	0	0	0.55
731	26.3	10.203	7.40588	0	0	0	0	0	0	0	0	0	0	0	0	0.0876713	0	0	0	0	0	0	0	0	0	0.55
732	41.93	0	24.7463	0	0	0	0	10.641	19.302	1	0	0	0	0	0	0.0547707	0	0	0	0	0	0	0	0	0	0.55
735	12.03	0	5.59792	0	0	0	0	0	0	1	0	0	0	0	0	0.0645435	0	0	3.34093	0	0	0	0	0	0	0.56
737	71.64	0	23.3729	0	1	0	0	0	135.385	1	0	0	0	0	0	0.0488443	0	0	3.61244	0	0	0	0	0	0	0.57
738	54.26	11.9448	36.4126	0	1	0	1	0	0	1	0	0	1	0	0	0.0534306	0	0	0	0	0	0	0	0	0	0.57
739	43.07	0	23.6091	0	0	0	0	0	37.314	1	0	0	0	0	0	0.058369	0	0	0	1	45.4686	1	0	0	0	0.57
742	57.28	0	18.5963	0	1	0	0	9.97311	35.5203	1	0	0	1	0	0	0.0437546	0	0	2.91894	0	0	0	0	0	0	0.58
743	61.69	11.7374	12.9003	0	0	0	1	9.79836	0	1	0	0	0	0	0	0.0419869	0	0	2.63694	0	48.2065	1	0	0	0	0.6
744	16.96	0	14.0309	0	0	0	0	0	0	1	0	0	0	0	0	0.0654027	0	0	3.22334	0	0	0	0	0	0	0.6
746	36.42	0	13.0475	0	0	0	0	0	0	1	0	0	0	1	0	0.0514799	0	0	2.94468	0	0	0	0	0	0	0.6
747	43.7	0	30.199	0	1	0	0	10.0352	0	1	0	0	0	0	1	0.0666461	0	0	0	0	0	0	0	0	0	0.6
749	55.84	12.1885	20.1773	0	1	0	0	0	51.7597	1	0	0	0	0	0	0.060756	0	0	0	0	73.1762	0	0	0	0	0.6
750	41.3	0	16.6616	0	0	0	0	0	0	1	0	0	0	0	0	0.0452176	0	0	3.36995	1	41.4266	0	0	0	0	0.6
751	0	0	0.886358	0	0	0	0	0	0	0	0	0	0	0	0	0	0	0	0	0	0	0	0	0	0	0.6
752	41.05	0	6.70124	0	0	0	0	0	0	0	0	0	0	0	0	0.0549732	0	0	3.28725	0	0	0	0	0	0	0.6
754	61.69	11.3061	9.96261	0	0	0	1	9.33704	0	1	0	0	0	0	0	0.0446053	0	0	2.56761	0	34.2977	1	0	0	0	0.61
755	47.56	11.3465	17.4825	0	1	1	1	0	108.808	1	0	0	0	0	0	0.0613192	0	0	2.87826	0	0	0	0	0	0	0.61
757	32.7	0	21.0005	0	1	0	0	11.1019	0	1	0	0	0	0	1	0.0733203	0	0	0	0	0	0	0	0	0	0.62
758	42.52	0	24.0523	0	1	0	0	0	0	1	0	0	1	0	0	0.0556481	0	0	3.47193	0	0	0	0	0	0	0.63
760	24.06	0	18.9816	0	0	0	0	0	0	1	0	0	0	0	0	0.0703918	0	0	3.50708	0	0	0	0	0	0	0.64
761	25.36	0	15.6535	0	0	0	0	0	0	1	0	0	0	0	0	0.0509202	0	0	0	0	0	0	0	0	0	0.64
763	23.78	0	17.3777	0	0	0	0	0	50.351	1	0	0	0	0	0	0.0531013	0	0	0	1	0	0	0	0	0	0.64
764	77.82	0	13.3285	0	0	0	0	0	0	1	0	0	0	0	0	0.0459195	0	0	0	1	0	0	0	0	0	0.65
765	0	0	10.8262	0	0	0	0	0	0	0	0	0	0	0	0	0.201184	0	0	0	0	0	0	0	0	0	0.67
766	0	0	7.95768	0	0	0	0	0	0	0	0	0	0	0	0	0.213388	0	0	0	0	0	0	0	0	0	0.69
767	37.39	0	19.4669	0	0	0	0	0	0	1	1	0	0	0	0	0.0664199	0	0	3.29869	0	0	0	0	0	0	0.69
768	12.03	0	5.57703	0	0	0	0	0	0	0	0	0	0	0	0	0.0642119	0	0	3.36259	0	0	0	0	0	0	0.7
769	31.64	0	26.3612	0	1	0	0	9.07791	0	1	0	0	0	0	0	0.0691374	0	0	0	1	0	0	0	0	0	0.7
771	0	0	6.67662	0	0	0	0	0	0	0	0	0	0	0	0	0.178863	0	0	0	0	0	0	0	0	0	0.74
772	40.16	0	35.5115	0	1	0	0	0	88.7905	1	0	0	0	0	0	0.0660628	0	0	0	0	0	0	0	0	0	0.74
773	30.18	0	17.8961	0	0	0	0	0	37.314	1	0	0	0	0	0	0.0440894	0	1	0	1	45.4686	1	0	0	0	0.74
774	16.96	0	23.5695	0	0	0	0	0	0	1	0	0	0	0	0	0.0749096	0	0	3.55315	0	0	0	0	0	0	0.75
775	39.08	0	17.0096	0	0	0	0	0	44.0041	1	0	0	1	0	0	0.0449217	0	1	3.34829	0	0	0	0	0	0	0.77
776	35.16	0	19.8672	0	0	0	0	0	31.6995	1	0	0	0	0	0	0.0574488	0	0	3.65053	0	44.7716	0	0	0	0	0.78
778	56.59	13.2659	29.521	0	1	0	1	0	187.362	1	0	0	0	0	0	0.0563568	0	0	0	1	0	0	0	0	0	0.78
779	56.84	0	19.2702	0	1	0	0	0	0	1	0	0	1	0	0	0.0532175	0	0	0	0	0	1	0	0	0	0.79
780	56.84	0	19.2702	0	1	0	0	0	0	1	0	0	1	0	0	0.0532175	0	0	0	0	0	1	0	0	0	0.79
782	16.96	0	23.5893	0	0	0	0	0	0	1	0	0	0	0	0	0.0745221	0	0	3.69317	0	0	0	0	0	0	0.8
783	32.51	0	18.3866	0	0	0	0	0	0	1	0	0	0	0	0	0.0459702	0	0	0	1	45.1778	0	0	0	0	0.8
785	77.82	0	11.6676	0	0	0	0	0	0	1	0	0	0	0	0	0.0458067	0	0	0	1	0	0	0	0	0	0.81
788	32.7	0	20.3225	0	0	0	0	11.572	0	1	0	0	0	0	1	0.0497401	0	0	0	0	32.0839	0	0	0	0	0.82
789	28.48	12.4938	29.3278	0	1	0	0	0	0	1	0	0	0	0	0	0.0668599	0	0	0	0	0	1	0	0	0	0.83
791	62.41	0	22.9102	0	1	0	0	0	128.72	1	0	0	0	0	0	0.050565	0	0	3.58527	0	0	0	0	0	0	0.83
792	29.54	12.3864	16.0025	0	0	0	0	0	0	1	0	0	0	0	0	0.0613331	0	0	0	0	0	0	0	0	0	0.85
794	46.18	0	31.9005	0	1	0	0	0	67.9828	1	0	0	0	0	0	0.0646282	0	0	3.69549	0	0	0	0	0	0	0.85
795	0	0	8.03117	0	0	0	0	0	0	0	0	0	0	0	0	0.178446	0	0	0	0	0	0	0	0	0	0.86
796	0	0	7.02592	0	0	0	0	0	0	0	0	0	0	0	0	0.204124	0	0	0	0	0	0	0	0	0	0.86
797	33.29	0	17.8722	0	1	0	0	0	0	1	0	0	0	0	0	0.062921	0	0	3.65659	0	0	0	0	0	0	0.87
798	32.78	11.6518	14.8484	0	0	0	1	0	0	1	0	0	0	0	0	0.0497888	0	0	0	0	0	0	0	0	1	0.88
800	42.52	0	26.3543	0	1	0	0	0	0	1	0	0	1	0	0	0.0524545	0	0	3.26596	0	0	0	0	0	0	0.88
801	29.85	0	18.9993	0	0	0	0	0	44.0041	1	0	0	1	0	0	0.0615102	0	1	3.45245	0	0	0	0	0	0	0.89
802	0	0	7.07893	0	0	0	0	0	0	0	0	0	0	0	0	0.232308	0	0	0	0	0	0	0	0	0	0.9
803	0	0	5.77625	0	0	0	0	0	0	0	0	0	0	0	0	0.144338	0	0	0	0	0	0	0	0	0	0.9
804	0	0	5.23061	0	0	0	0	0	12.4667	0	0	0	0	0	0	0.161419	0	0	0	0	0	0	0	0	0	0.9
805	67.59	12.137	17.7218	0	1	0	1	0	0	1	1	0	0	0	0	0.0583346	0	0	2.8594	1	0	0	0	0	0	0.9
806	46.94	0	41.6605	0	1	0	0	10.5822	0	1	0	0	0	0	0	0.0597073	0	0	0	0	0	0	0	0	0	0.91
807	12.47	0	23.0094	0	1	0	0	0	0	1	0	0	0	0	0	0.0515142	0	0	0	0	0	0	0	0	0	0.92
808	12.47	0	23.0094	0	1	0	0	0	0	1	0	0	0	0	0	0.0515142	0	0	0	0	0	0	0	0	0	0.92
809	33.29	0	24.3891	0	1	0	0	0	0	1	0	0	0	0	0	0.06303	0	0	3.68621	0	0	0	0	0	0	0.92
810	26.02	0	6.09649	0	0	0	0	0	0	1	0	0	0	0	0	0.0704199	0	0	0	0	0	0	0	0	0	0.93
811	12.03	0	7.15317	0	0	0	0	0	0	1	0	0	0	0	0	0.0713139	0	0	3.2134	0	0	0	0	0	0	0.96
812	0	0	9.44178	0	0	0	0	0	0	0	0	0	0	0	0	0.178168	0	0	0	0	0	0	0	0	0	0.96
813	33.29	0	31.4201	0	1	0	0	0	0	1	0	0	1	0	0	0.0570957	0	0	3.48144	0	0	0	0	0	0	0.96
814	0	0	6.6268	0	0	0	0	0	0	0	0	0	0	0	0	0.163339	0	0	0	0	0	0	0	0	0	0.96
815	30.95	0	14.8295	0	0	0	0	0	0	1	0	0	0	0	0	0.0631288	0	0	0	1	0	0	0	0	0	0.97
816	33.29	0	27.3421	0	1	0	0	0	0	1	0	0	0	0	0	0.0623868	0	0	3.69223	0	0	0	0	0	0	0.98
817	6.48	0	24.2493	0	0	0	0	0	0	1	0	0	0	0	0	0.0888651	0	0	0	0	0	0	0	0	0	0.98
818	6.48	0	20.104	0	0	0	0	0	0	1	0	0	0	0	0	0.0603333	0	0	0	0	47.8193	0	0	0	0	0.99
820	0	0	5.69869	0	0	0	0	0	0	0	0	0	0	0	0	0.288675	0	0	0	0	0	0	0	0	0	1
821	29.54	11.6823	24.8788	0	0	0	0	0	0	1	0	0	0	0	0	0.0725659	0	0	0	0	0	0	0	0	0	1
822	0	0	6.37132	0	0	0	0	0	0	0	0	0	0	0	0	0	0	0	0	0	0	0	0	0	0	1
823	0	0	5.73059	0	0	0	0	0	0	0	0	0	0	0	0	0.288675	0	0	0	0	0	0	0	0	0	1
825	12.47	0	15.8058	0	0	0	0	0	0	1	0	0	0	0	0	0.0493005	0	0	0	0	44.4245	0	0	0	0	1
826	44.81	12.154	21.348	0	1	0	1	0	94.6204	1	0	0	0	0	0	0.0522682	0	0	2.74997	0	0	0	0	0	1	1
827	61.17	12.7629	22.5686	0	1	0	0	0	0	1	0	0	1	0	0	0.0848256	0	0	0	0	0	0	0	0	0	1
828	6.48	0	20.0318	0	0	0	0	0	0	1	0	0	0	0	0	0.0858102	0	0	0	0	0	0	0	0	0	1.01
829	0	0	10.4135	0	0	0	0	0	0	0	0	0	0	0	0	0.139751	0	0	0	0	0	0	0	0	0	1.02
832	12.03	0	15.4078	0	0	0	0	0	0	1	0	0	0	0	0	0.0555057	0	0	3.22626	0	40.5621	0	0	0	0	1.04
833	38.33	12.2279	19.1499	0	0	0	1	0	47.5623	1	0	0	1	0	0	0.0379208	0	0	2.15716	0	0	0	0	0	0	1.04
836	0	0	8.47401	0	0	0	0	0	0	0	0	0	0	0	0	0.150166	0	0	0	0	0	0	0	0	0	1.07
837	20.31	12.3054	16.2644	0	0	0	0	0	56.5918	1	0	0	0	0	0	0.0749897	0	0	0	0	0	1	0	0	0	1.08
838	12.03	0	11.8782	0	0	0	0	0	0	1	0	0	0	0	0	0.136046	0	0	3.31221	0	0	0	0	0	0	1.08
841	12.03	0	12.5691	0	0	0	0	0	17.8282	1	0	0	0	0	0	0.0507143	0	0	3.78833	0	25.0749	0	0	0	0	1.11
843	36.26	0	17.997	0	0	0	0	0	0	1	0	0	0	0	0	0.074051	0	0	0	0	0	0	0	0	0	1.13
844	32.34	12.7264	27.4498	0	1	0	0	0	0	1	0	0	0	0	0	0.0710996	0	0	3.49287	0	97.7509	1	0	0	0	1.14
845	50.72	0	16.6843	0	1	0	0	9.72608	0	1	0	0	0	0	0	0.0613593	0	0	3.16991	0	0	0	0	0	0	1.15
846	24.39	0	15.022	0	0	0	0	0	0	1	0	0	0	0	0	0.0550107	0	0	3.35255	0	0	0	0	0	0	1.2
847	46.18	0	27.8723	0	1	0	0	0	70.2924	1	0	0	0	0	0	0.0610472	0	0	3.69704	0	0	0	0	0	0	1.26
848	40.54	12.1215	24.0437	0	1	0	0	10.8815	0	1	0	0	1	0	1	0.0648124	0	0	0	1	0	1	0	0	0	1.3
849	8.17	0	16.465	0	0	0	0	0	0	1	0	0	0	0	0	0.0625199	0	0	0	0	0	0	0	0	0	1.3
850	12.03	0	19.3064	0	0	0	0	0	0	1	0	0	0	0	0	0.0582511	0	0	3.30934	0	0	0	0	0	0	1.3
851	16.96	0	16.2953	0	0	0	0	0	0	1	0	0	0	0	0	0.0670133	0	0	3.20497	0	0	0	0	0	0	1.37
852	6.48	0	17.2213	0	0	0	0	0	0	1	0	0	0	0	0	0.0798981	0	0	0	0	0	0	0	0	0	1.38
854	40.54	12.1284	25.599	0	1	0	0	10.9093	0	1	0	0	1	0	1	0.0673278	0	0	0	0	0	1	0	0	0	1.38
857	29.1	12.0534	15.0813	0	0	0	0	0	0	1	0	0	0	0	0	0.0665593	0	0	3.24418	0	0	1	0	0	0	1.4
859	8.17	0	21.1725	0	0	0	0	0	0	1	0	0	1	0	0	0.0604327	0	0	0	0	0	0	0	0	0	1.44
860	11.41	0	27.5612	0	0	0	0	0	0	1	0	0	1	0	0	0.0617673	0	0	0	0	0	0	0	0	0	1.44
863	28.16	0	13.2409	0	0	0	0	0	0	1	0	0	0	0	0	0.051656	0	0	3.1523	0	0	0	0	0	0	1.64
865	69.06	11.5533	35.5681	0	1	0	1	0	229.942	1	0	0	0	0	0	0.0525473	0	1	0	0	0	0	0	0	0	-0.28
866	20.08	0	9.76768	0	0	0	0	0	0	1	0	0	0	0	0	0.0536528	0	0	0	0	0	0	0	1	0	0
868	137.5	0	14.155	0	0	0	0	0	63.6611	1	1	0	0	2	0	0.0513618	0	0	2.45104	0	0	0	0	0	0	-1.54
869	62.32	11.2858	20.7385	1	1	0	0	9.26937	26.9228	0	0	0	0	0	0	0.0497957	0	0	0	0	0	0	0	0	0	-1.42
871	93.03	11.4752	11.9244	0	0	0	1	9.0182	68.6508	1	0	0	0	0	0	0.0411657	0	1	2.47481	0	0	0	0	0	0	-1.3
873	90.37	11.4514	11.0626	0	0	0	1	8.89611	38.6924	1	0	0	0	0	0	0.0477348	0	0	0	0	0	0	0	0	0	-1.2
875	90.02	10.7599	17.5433	0	1	0	0	0	144.593	1	1	5.7191	0	0	0	0.0632448	0	0	3.03684	0	0	0	0	0	0	-1.12
876	57.53	10.2618	4.08028	0	0	0	0	8.40565	0	0	0	0	0	0	0	0.0409056	0	0	0	0	0	0	0	0	0	-1.1
878	166.75	12.0759	65.2643	0	1	1	1	11.8467	0	1	1	0	0	0	0	0.0605351	0	0	2.63417	0	0	0	0	0	0	-1.03
879	171.17	13.002	102.602	0	1	1	1	11.9702	228.03	1	1	0	0	0	2	0.049136	0	0	0	0	0	0	0	0	0	-1.03
880	81	11.4836	41.3498	1	1	1	0	9.42209	0	1	0	0	0	0	1	0.0619913	0	0	0	0	0	0	0	0	0	-1
881	166.75	12.0759	65.2643	0	1	1	1	11.8467	0	1	1	0	0	0	0	0.0605351	0	0	2.63417	0	0	0	0	0	0	-0.95
882	84.58	10.7465	15.7469	0	1	0	1	9.68424	0	1	0	0	0	0	0	0.0565851	0	0	3.13085	0	0	0	0	0	0	-0.9
884	78.82	12.2054	26.929	0	1	0	1	0	138.451	1	0	0	0	0	0	0.0512795	0	0	2.91044	0	0	0	0	0	0	-0.8
886	133.08	11.278	15.2899	0	0	0	1	9.14227	52.4019	1	0	0	0	0	0	0.043698	0	0	2.16954	0	0	0	0	0	0	-0.72
887	133.08	11.278	15.2899	0	0	0	1	9.14227	52.4019	1	0	0	0	0	0	0.043698	0	0	2.16954	0	0	0	0	0	0	-0.7
888	63.95	0	36.1939	0	1	0	0	0	0	1	0	0	0	0	0	0.0603618	0	0	0	0	0	0	0	0	0	-0.7
890	63.6	10.5728	6.56848	0	0	0	0	8.68724	0	0	0	0	0	0	0	0.0385727	0	0	0	0	0	0	0	0	0	-0.5
892	65.2	11.6093	21.267	0	1	0	1	0	51.376	1	0	0	0	0	0	0.0725902	0	0	2.37234	0	0	0	0	0	0	-0.46
893	52.57	11.5149	18.7253	0	1	0	1	9.7943	42.1136	1	0	0	0	0	0	0.0605282	0	0	2.74147	0	0	0	0	0	0	-0.43
894	65.2	11.6174	15.8968	0	0	0	1	0	45.631	1	1	0	0	0	0	0.0663762	0	0	2.34413	0	0	0	0	0	0	-0.4
895	70.59	11.3821	20.2373	0	1	0	1	9.96272	0	1	0	0	0	0	0	0.0522854	0	0	2.83918	0	0	0	0	0	0	-0.4
897	41.03	0	10.961	0	0	0	0	0	0	0	0	0	0	0	0	0.0485178	0	0	0	0	0	0	0	2	0	-0.38
899	24.92	0	5.18776	0	0	0	0	0	0	1	0	0	0	0	0	0.0614675	0	0	3.07618	0	0	0	0	0	0	-0.3
900	72.68	11.3733	7.05131	0	0	0	1	0	22.5214	1	0	0	0	0	0	0.0342952	0	1	0	0	0	0	0	0	0	-0.3
901	0	0	1.60306	0	0	0	0	0	0	0	0	0	0	0	0	0	0	0	0	0	0	0	0	0	0	-0.3
902	52.93	0	21.4013	0	0	0	0	10.2078	18.0993	1	0	0	0	0	0	0.0503694	0	0	0	0	0	0	0	0	0	-0.3
903	46.17	10.696	7.89671	0	0	0	1	0	25.9667	0	0	0	0	0	0	0.0548375	0	0	2.28042	0	0	0	0	0	0	-0.3
904	50.41	0	18.4509	0	0	0	1	10.515	38.581	1	0	0	0	0	0	0.0388675	0	1	0	0	48.0629	1	0	0	0	-0.3
906	58.2	11.375	11.288	0	0	0	1	0	29.0762	0	0	0	0	0	0	0.0627	0	0	2.71079	0	0	0	0	0	0	-0.26
907	37.3	10.4794	9.21244	1	0	0	0	8.63546	0	0	0	0	0	0	0	0.120912	0	0	0	0	0	0	0	0	0	-0.2
908	52.93	0	21.4013	0	0	0	0	10.2078	18.0993	1	0	0	0	0	0	0.0503694	0	0	0	0	0	0	0	0	0	-0.2
909	45.59	0	22.4878	0	1	0	0	11.1519	0	1	0	0	0	0	0	0.0584777	0	0	0	0	0	0	0	0	0	-0.2
910	75.27	10.6237	8.80072	0	0	0	1	0	0	0	0	0	0	0	0	0.040765	0	0	2.04139	0	0	0	0	0	0	-0.2
911	83.02	0	25.8544	0	0	0	1	0	142.924	1	1	0	1	0	0	0.0342904	0	0	0	0	0	0	0	0	0	-0.2
912	45.78	12.2703	22.1863	0	0	0	1	0	60.6526	1	1	0	0	0	0	0.0536012	0	0	0	0	0	0	0	0	0	-0.2
913	20.23	0	1.38743	0	0	0	0	7.56944	0	0	0	0	0	0	0	0	0	0	0	0	0	0	0	0	0	-0.2
914	63.32	10.5761	11.8046	1	0	0	0	8.70649	0	1	0	0	0	0	0	0.0988402	0	0	0	0	0	0	0	0	0	-0.19
915	20.23	0	3.71084	0	0	0	0	8.14352	0	0	0	0	0	0	0	0	0	0	0	0	0	0	0	0	0	-0.17
916	20.23	0	2.35011	0	0	0	0	7.875	0	0	0	0	0	0	0	0	0	0	0	0	0	0	0	0	0	-0.16
917	94.83	11.8335	41.8078	0	1	0	0	9.45751	40.5452	0	0	0	0	0	1	0.0625951	0	0	0	0	0	0	0	0	0	-0.15
920	70.93	0	20.6874	0	0	0	0	0	0	1	0	0	0	0	0	0.0444194	0	0	0	0	0	0	0	0	0	-0.15
921	69.11	9	1.22164	0	0	0	1	0	0	0	0	0	0	0	0	0	0	0	0	0	0	0	0	0	0	-0.14
922	0	0	1.91981	0	0	0	0	0	0	0	0	0	0	0	0	0	0	0	0	0	0	0	0	0	0	-0.13
923	75.27	11.055	11.6498	0	0	0	1	0	0	1	0	0	0	0	0	0.0439166	0	0	2.1402	0	0	0	0	0	0	-0.12
924	154.1	13.002	102.997	0	1	1	0	11.9761	223.214	1	1	0	0	0	2	0.0503959	0	0	0	0	0	0	0	0	0	-0.1
926	58.2	12.025	17.1449	0	0	0	1	0	0	1	0	0	0	0	0	0.0669899	0	0	2.55141	0	0	0	0	0	0	-0.1
927	26.93	11.6034	8.4158	0	0	0	1	0	35.4532	1	0	0	0	0	0	0.041902	0	0	0	0	0	0	0	0	0	-0.1
928	20.23	0	2.59206	0	0	0	0	8.05556	0	0	0	0	0	0	0	0	0	0	0	0	0	0	0	0	0	-0.1
929	17.07	9.8125	2.8675	0	0	0	0	0	0	0	0	0	0	0	0	0	0	0	0	0	0	0	0	0	0	-0.1
930	57.28	0	14.2974	0	0	0	0	9.78676	38.287	1	0	0	0	0	0	0.0486237	0	0	3.17751	0	0	0	0	0	0	-0.1
931	48.02	11.753	10.194	0	0	0	1	0	0	1	0	0	0	0	0	0.0409438	0	0	0	0	32.7619	0	0	0	0	-0.1
933	115.54	11.099	26.3822	0	1	1	1	0	79.4804	1	0	0	0	0	0	0.0471306	0	0	0	0	0	0	0	0	0	-0.07
935	63.4	10.8914	9.65663	0	0	0	1	0	34.3952	1	0	0	0	0	0	0.0684238	0	0	0	0	0	0	0	0	0	-0.04
936	65.64	13.3745	33.4231	0	1	0	1	0	185.866	1	1	0	0	0	0	0.0775844	0	0	0	1	0	0	0	0	0	-0.04
938	64.16	12.9221	31.2834	0	1	0	1	0	66.8979	1	0	5.33944	1	0	0	0.0543278	0	0	0	0	0	0	0	0	0	0
939	9.23	0	3.20424	0	0	0	0	0	0	0	0	0	0	0	0	0.204124	0	0	0	0	0	0	0	0	0	0
940	12.47	0	22.3065	0	0	0	0	0	0	1	0	0	0	0	0	0.0688678	0	0	0	0	0	0	0	0	0	0.02
941	24.06	0	9.77586	0	0	0	0	0	0	1	0	0	0	0	0	0.0681781	0	0	3.12113	0	0	0	0	0	0	0.03
942	0	0	0	0	0	0	0	0	0	0	0	0	0	0	0	0	0	0	0	0	0	0	0	0	0	0.03
944	3.24	0	19.108	0	0	0	0	0	0	1	0	0	0	0	0	0.0556062	0	0	0	0	0	0	0	0	0	0.08
945	66.48	11.3392	15.6865	0	0	0	1	0	0	1	0	0	0	0	0	0.0534706	0	0	2.23374	0	0	0	0	0	0	0.1
946	0	0	1.5	0	0	0	0	0	0	0	0	0	0	0	0	0	0	0	0	0	0	0	0	0	0	0.1
948	75.27	11.0042	16.1256	0	0	0	1	0	0	1	0	0	0	0	0	0.0621111	0	0	2.18104	0	0	0	0	0	0	0.1
949	36.42	0	9.33259	0	0	0	0	0	35.3102	1	0	0	0	1	0	0.0569735	0	0	3.05241	0	0	0	0	0	0	0.1
952	8.17	0	25.7069	0	0	0	0	0	0	1	0	0	0	0	0	0.0760233	0	0	0	0	0	0	0	0	0	0.2
954	0	0	3.90004	0	0	0	0	0	0	0	0	0	0	0	0	0.0713713	0	0	0	0	0	0	0	0	0	0.2
955	0	0	4.13539	0	0	0	0	0	0	0	0	0	0	0	0	0.073365	0	0	0	0	0	0	0	0	0	0.2
956	9.23	0	7.14209	0	0	0	0	0	0	0	0	0	0	0	0	0.0277059	0	0	0	0	0	0	0	0	0	0.24
957	16.13	0	7.97387	0	0	0	0	0	28.8532	1	0	0	0	0	0	0.0705366	0	0	0	0	0	0	0	0	0	0.24
958	0	0	3.83704	0	0	0	0	0	0	0	0	0	0	0	0	0	0	0	0	0	0	0	0	0	0	0.27
959	41.49	0	13.3955	0	0	0	0	9.64118	0	1	0	0	0	0	0	0.0603733	0	0	3.16289	0	0	0	0	0	0	0.28
960	0	0	3.21967	0	0	0	0	0	0	0	0	0	0	0	0	0	0	0	0	0	0	0	0	0	0	0.3
961	0	0	6.44156	0	0	0	0	0	0	0	0	0	0	0	0	0	0	0	0	0	0	0	0	0	0	0.3
962	0	0	2.8087	0	0	0	0	0	0	0	0	0	0	0	0	0	0	0	0	0	0	0	0	0	0	0.3
963	40.62	12.0945	14.5779	0	0	0	1	0	0	1	0	0	0	0	0	0.0423197	0	0	0	0	51.2987	0	0	0	0	0.3
964	0	0	4.5672	0	0	0	0	0	0	0	0	0	0	0	0	0	0	0	0	0	0	0	0	0	0	0.4
965	49.41	11.7264	12.7705	0	0	0	1	0	0	1	0	0	0	0	0	0.0415287	0	0	2.71967	0	48.262	0	0	0	0	0.4
966	35.94	0	23.7568	0	1	0	0	8.77909	0	1	0	0	0	0	0	0.0614557	0	0	0	0	0	0	0	0	0	0.4
969	0	0	4.09029	0	0	0	0	0	0	0	0	0	0	0	0	0.0636895	0	0	0	0	0	0	0	0	0	0.4
971	3.24	0	18.8415	0	0	0	0	0	0	1	0	0	0	0	0	0.0798895	0	0	0	0	0	0	0	0	0	0.4
972	9.23	0	7.13025	0	0	0	0	0	0	0	0	0	0	0	0	0.0350326	0	0	0	0	0	0	0	0	0	0.42
973	61.69	11.7894	15.0555	0	0	0	1	9.84616	0	1	0	0	0	0	0	0.0436957	0	0	2.61332	0	50.6313	1	0	0	0	0.44
974	90.71	0	9.63535	0	0	0	0	0	0	1	0	0	0	0	0	0.0426247	0	0	0	1	0	0	0	0	0	0.48
976	69.64	12.5099	29.5426	0	1	0	1	0	89.7673	1	0	0	0	0	0	0.0693517	0	0	0	0	0	0	0	0	0	0.5
977	41.46	11.6564	11.6899	0	0	0	1	0	0	1	0	0	0	0	0	0.0443544	0	0	2.83717	0	45.354	1	0	0	0	0.5
979	41.93	0	23.0742	0	0	0	0	10.5542	19.302	1	0	0	0	0	0	0.0503621	0	0	0	0	0	0	0	0	0	0.6
982	41.49	0	14.9493	0	0	0	0	9.84395	0	1	0	0	0	0	0	0.0510051	0	0	3.18868	0	0	0	0	0	0	0.64
983	3.24	0	22.4284	0	0	0	0	0	0	1	0	0	0	0	0	0.0658216	0	0	0	0	0	0	0	0	0	0.66
984	41.05	0	23.4102	0	0	0	0	0	0	1	0	0	1	0	0	0.0483254	0	0	3.19709	0	0	0	0	0	0	0.68
985	20.23	0	11.5455	0	0	0	0	9.92963	0	0	0	0	0	0	0	0.0604703	0	0	0	0	0	0	0	0	0	0.7
986	32.7	0	19.1946	0	0	0	0	11.189	0	1	0	0	0	0	1	0.0707471	0	0	0	0	0	0	0	0	0	0.7
988	21.26	0	16.5009	0	0	0	0	0	0	1	0	0	1	0	0	0.0505597	0	0	3.05397	0	0	0	0	0	0	0.72
989	43.78	13.8108	35.92	0	1	0	1	11.2659	0	1	0	0	0	0	1	0.0580599	0	0	0	1	0	0	0	0	0	0.77
990	35.16	0	19.3277	0	0	0	0	0	31.6995	1	0	0	0	0	0	0.0577334	0	0	3.56851	0	44.7716	0	0	0	0	0.8
991	0	0	6.60412	0	0	0	0	0	0	0	0	0	0	0	0	0.225592	0	0	0	0	0	0	0	0	0	0.8
994	6.48	0	17.5629	0	0	0	0	0	0	1	0	0	0	0	0	0.0573849	0	0	0	0	44.4245	0	0	0	0	0.8
995	0	0	8.40873	0	0	0	0	0	0	0	0	0	0	0	0	0.200646	0	0	0	0	0	0	0	0	0	0.86
997	38.77	12.9369	27.0328	0	1	0	0	0	64.2837	1	0	0	0	0	0	0.0620003	0	0	0	0	0	1	0	0	0	0.89
998	20.31	13.1744	22.2137	0	0	0	0	0	0	1	0	0	0	0	0	0.0563331	0	0	0	0	0	0	0	0	0	0.9
999	3.24	0	17.0807	0	0	0	0	0	0	1	0	0	0	0	0	0.0564282	0	0	0	0	44.4245	0	0	0	0	0.9
1001	12.03	0	7.15317	0	0	0	0	0	0	1	0	0	0	0	0	0.0713139	0	0	3.2134	0	0	0	0	0	0	0.9
1003	0	0	9.84231	0	0	0	0	0	0	0	0	0	0	0	0	0.195873	0	0	0	0	0	0	0	0	0	0.98
1004	36.26	0	20.2875	0	0	0	0	0	50.8803	1	0	0	1	0	0	0.0508763	0	0	0	0	0	0	0	0	0	0.99
1005	44.81	12.154	21.348	0	1	0	1	0	94.6204	1	0	0	0	0	0	0.0522682	0	0	2.74997	0	0	0	0	0	1	1
1006	8.17	0	17.806	0	0	0	0	0	0	1	0	0	0	0	0	0.0660493	0	0	0	1	0	0	0	0	0	1.06
1008	15.27	0	15.8649	0	0	0	0	0	0	1	0	0	0	0	0	0.0560197	0	0	3.24417	0	40.5621	0	0	0	0	1.2
1009	8.17	0	15.6697	0	0	0	0	0	0	1	0	0	0	0	0	0.0665973	0	0	0	0	0	0	0	0	0	1.23
1010	12.47	0	13.2838	0	0	0	0	0	0	1	0	0	0	0	0	0.0538836	0	0	0	0	0	0	0	0	0	1.3
1011	16.96	0	16.094	0	0	0	0	0	0	1	0	0	0	0	0	0.064908	0	0	3.20866	1	0	0	0	0	0	1.4
1012	12.03	0	17.5293	0	0	0	0	0	0	1	0	0	0	0	0	0.0619935	0	0	3.40544	1	0	0	0	0	0	1.6
		Test set
Name	TPSA(NO)	mindO	Eta_C	nRCOOH	B09[C-O]	B08[O-O]	B02[N-O]	minsOH	D/Dtr05	B05[C-N]	B09[N-N]	SaaO	B10[C-F]	nC(=N)N2	nOHt	X4Av	F09[N-Br]	nImidazoles	minssNH	B08[N-Cl]	D/Dtr07	C-039	nRSSR	O-062	nArOCON	logBB
9	285.14	10.7805	39.9773	0	1	1	1	8.6781	0	1	0	0	0	0	0	0.0515673	0	0	2.15458	0	0	0	0	0	0	-1.54
10	117.75	0	10.1719	0	1	0	0	9.19206	47.1556	1	0	0	0	1	0	0.0528758	0	0	0	0	0	0	0	0	0	-1.54
17	113.42	12.912	33.5542	0	1	1	1	0	77.9805	1	1	0	0	0	0	0.0565515	0	0	2.80308	0	0	0	0	0	0	-1.3
18	127.39	0	15.3493	0	1	0	0	9.29034	124.876	1	0	5.28073	0	0	0	0.0354626	0	0	3.11548	0	0	0	0	0	0	-1.3
22	81.7	11.1244	19.3877	0	1	1	1	0	0	1	0	0	0	0	0	0.0470949	0	0	2.80525	0	0	0	0	0	0	-1.17
28	101.22	10.7582	16.3718	0	1	0	0	0	0	1	0	0	0	0	0	0.0502149	0	0	2.99816	0	0	0	0	0	0	-1
30	101.9	13.3571	56.8293	0	1	1	1	10.1532	0	1	0	0	0	0	0	0.0762573	0	0	3.06158	0	0	0	0	0	0	-0.93
37	81.93	12.9069	16.294	0	1	0	1	0	56.9209	1	0	0	0	0	0	0.0378653	0	0	2.74809	0	0	0	0	0	0	-0.8
39	278.8	13.8911	191.749	0	1	1	1	12.0192	0	1	1	0	0	0	0	0.0598921	0	0	2.67194	0	0	0	0	0	0	-0.78
43	62.16	0	28.1448	0	1	0	0	9.69843	0	1	0	0	0	0	0	0.0501608	0	0	0	0	0	0	0	0	0	-0.77
46	133.08	11.278	15.2899	0	0	0	1	9.14227	52.4019	1	0	0	0	0	0	0.043698	0	0	2.16954	0	0	0	0	0	0	-0.72
47	278.8	13.8839	191.765	0	1	1	1	12.0888	0	1	1	0	0	0	0	0.0600073	0	0	2.66999	0	0	0	0	0	0	-0.7
51	143.72	10.8092	13.0208	0	0	1	1	8.89203	93.3254	1	0	0	0	0	0	0.0367936	0	0	0	0	0	0	0	0	0	-0.67
62	84.22	10.9063	11.3544	0	1	1	1	0	0	1	1	0	0	0	0	0.0439365	0	0	2.63909	0	0	0	0	0	0	-0.58
64	221.29	12.9782	100.232	0	1	1	1	11.7799	0	1	0	0	0	0	1	0.0480915	0	0	2.72288	0	0	0	0	0	0	-0.55
65	164.63	11.9669	38.6812	0	1	1	1	10.4649	0	1	0	0	0	0	1	0.0448143	0	0	0	0	0	0	0	0	0	-0.52
85	86.34	11.0194	16.532	0	1	0	0	0	71.7172	1	0	0	0	0	0	0.0444454	0	0	3.08539	0	0	0	0	0	0	-0.28
87	86.59	10.9797	15.9931	0	1	0	0	0	136.422	1	0	5.84619	0	0	0	0.0422834	0	0	3.06368	0	0	0	0	0	0	-0.27
91	94.83	11.8954	38.5846	0	1	0	0	9.37226	37.4146	0	0	0	0	0	1	0.0713825	0	0	0	0	0	0	0	0	0	-0.22
95	38.05	0	5.64508	0	0	0	0	0	0	1	0	0	0	0	0	0.0662449	0	0	2.61618	0	0	0	0	0	0	-0.2
101	61.42	0	15.42	0	0	0	0	0	114.448	1	0	0	0	0	0	0.0411221	0	0	0	1	0	0	0	0	0	-0.16
102	65.25	11.949	13.5245	0	0	0	1	0	45.3297	1	0	0	0	0	0	0.0544715	0	0	2.77637	0	47.3673	1	0	0	0	-0.14
103	24.5	0	20.599	0	0	0	0	0	0	1	1	0	0	0	0	0.0767296	0	0	3.41063	0	0	0	0	0	0	-0.13
105	54.34	11.7001	20.2743	0	1	0	1	0	90.4659	1	1	0	0	0	0	0.052227	0	0	2.9489	0	0	0	0	0	0	-0.12
106	61.6	12.8336	27.4014	0	1	0	1	0	0	1	0	0	0	0	0	0.0578751	0	0	2.97391	0	0	0	0	0	0	-0.11
117	61.6	12.908	31.694	0	1	0	1	0	112.4	1	0	0	0	0	0	0.0620373	0	0	2.99042	0	0	0	0	0	0	-0.03
120	63.32	10.1098	7.43137	1	0	0	0	8.30588	0	0	0	0	0	0	0	0.101447	0	0	0	0	0	0	0	0	0	0
123	50.41	0	7.67868	0	0	0	0	0	0	1	0	0	0	1	0	0.0461702	0	0	3.01812	0	0	0	0	0	0	0
126	50.72	0	15.706	0	1	0	0	9.78185	0	1	0	0	0	0	0	0.0519285	0	0	3.1559	0	0	0	0	0	0	0.02
136	36.42	0	9.17442	0	0	0	0	0	35.3102	1	0	0	0	0	0	0.0580811	0	0	3.10449	0	0	0	0	0	0	0.11
145	221.29	12.9763	102.182	0	1	1	1	11.7641	0	1	0	0	1	0	1	0.0476931	0	0	2.61989	0	0	0	0	0	0	0.19
146	32.78	12.9125	29.0485	0	1	0	1	0	92.8708	1	0	0	0	0	0	0.069602	0	0	0	0	0	0	0	0	0	0.2
147	29.26	0	15.7538	0	0	0	0	0	0	1	0	0	0	0	0	0.069396	0	0	0	0	0	0	0	0	0	0.2
154	23.96	0	21.736	0	0	0	0	0	32.9189	1	0	0	0	0	0	0.0541239	0	0	3.27592	0	45.4313	0	0	0	0	0.28
160	65.25	12.3817	17.3024	0	1	0	1	0	0	1	0	0	0	0	0	0.04205	0	0	2.90299	0	79.517	1	0	0	0	0.3
169	41.49	0	16.3713	0	0	0	0	11.2384	22.6082	1	0	0	0	0	1	0.0467769	0	0	3.32825	0	29.0983	0	0	0	0	0.39
170	35.94	0	23.7568	0	1	0	0	8.77909	0	1	0	0	0	0	0	0.0614557	0	0	0	0	0	0	0	0	0	0.39
172	16.13	0	7.97387	0	0	0	0	0	28.8532	1	0	0	0	0	0	0.0705366	0	0	0	0	0	0	0	0	0	0.4
173	27.03	0	7.77557	0	0	0	0	0	0	1	0	0	0	0	0	0.0646779	0	0	0	0	0	0	0	0	0	0.42
197	29.1	12.6657	18.002	0	0	0	1	0	0	1	0	0	0	0	0	0.0602637	0	0	3.09969	0	0	0	0	0	0	0.74
198	12.47	0	29.6418	0	0	0	0	0	72.1364	1	0	0	1	0	0	0.0639253	0	0	0	0	97.3525	0	0	0	0	0.74
199	55.12	12.315	12.2595	0	0	0	1	0	0	1	0	0	0	0	0	0.0461976	0	0	2.90313	0	0	0	0	0	0	0.74
203	44.81	12.439	26.6398	0	1	0	1	0	0	1	0	0	0	0	0	0.0575117	0	0	3.06303	0	0	0	0	0	0	0.78
210	0	0	7.07893	0	0	0	0	0	0	0	0	0	0	0	0	0.232308	0	0	0	0	0	0	0	0	0	0.9
218	12.47	0	18.3132	0	0	0	0	0	0	1	0	0	0	0	0	0.0554735	0	0	0	0	30.3133	0	0	0	0	1.06
220	42.52	0	24.0523	0	1	0	0	0	0	1	0	0	1	0	0	0.0556481	0	0	3.47193	0	0	0	0	0	0	1.11
223	44.37	12.0767	31.3174	0	1	0	1	0	0	1	1	0	1	0	0	0.0658651	0	0	2.94276	0	0	0	0	0	0	1.18
226	6.48	0	15.6597	0	0	0	0	0	0	1	0	0	0	0	0	0.0783753	0	0	0	0	0	0	0	0	0	1.38
232	92.79	12.2776	22.5496	0	1	0	1	0	0	1	0	0	0	1	0	0.050543	0	0	2.80384	0	0	0	0	0	0	-2
236	219.93	11.2015	41.4953	2	1	1	1	9.11277	115.13	1	1	0	0	0	0	0.0702657	0	0	2.53291	0	0	0	0	0	0	-1.89
238	133.75	12.8293	59.3519	0	1	0	1	11.5946	374.237	1	0	0	0	0	0	0.0690713	0	0	2.83233	0	0	0	0	0	0	-1.82
254	103.45	11.3062	20.2706	0	1	0	1	0	69.3214	1	1	0	0	0	0	0.0439942	0	1	2.4789	0	0	0	0	0	1	-1.4
256	111.79	10.9751	44.6693	1	1	1	1	8.97306	130.237	1	0	0	1	0	0	0.0464564	0	0	3.02362	0	0	0	0	0	0	-1.36
257	66.84	11.1916	20.6414	1	1	0	0	9.18883	52.0085	1	0	0	0	0	0	0.0652756	0	0	0	0	73.4925	0	0	0	0	-1.35
264	49.33	10.8273	13.2396	1	1	0	0	8.88672	0	0	0	0	0	0	0	0.0537358	0	0	3.08722	0	0	0	0	0	0	-1.3
265	93.03	11.4752	11.9244	0	0	0	1	9.0182	68.6508	1	0	0	0	0	0	0.0411657	0	1	2.47481	0	0	0	0	0	0	-1.3
267	66.84	11.2997	21.2972	1	1	0	1	9.26682	53.0987	1	0	0	0	0	0	0.047338	0	0	0	0	0	0	0	0	0	-1.26
268	37.3	10.6487	7.11568	0	1	0	0	8.74627	0	0	0	0	0	0	0	0.0478619	0	0	0	0	0	0	0	0	0	-1.26
269	86.26	10.3493	18.0665	0	1	0	0	0	72.5097	1	1	5.69998	0	0	0	0.07432	0	0	2.7394	0	0	0	0	0	0	-1.23
273	86.59	10.3741	15.6471	0	1	0	0	0	67.9439	1	0	5.64137	0	0	0	0.0710867	0	0	2.72789	0	0	0	0	0	0	-1.23
279	71.85	13.0857	39.3864	0	1	1	1	0	56.6163	1	0	0	0	0	0	0.0653701	0	0	0	0	0	0	0	0	0	-1.15
284	114.45	13.7298	57.1734	0	1	1	1	12.0801	161.056	1	1	0	0	0	0	0.0502641	0	0	2.92565	0	0	0	0	0	0	-1.1
297	61.88	12.3767	39.0954	0	1	0	1	0	269.243	1	0	0	0	0	0	0.0627232	0	0	3.92926	0	0	0	0	0	0	-1
299	46.5	0	13.9416	0	0	0	0	0	107.498	1	0	0	0	0	0	0.0448116	0	2	0	1	0	0	0	0	0	-1
309	91.48	13.2982	34.1895	0	1	0	1	11.5107	103.725	1	1	0	0	0	1	0.0590022	0	0	2.9596	0	0	0	0	0	0	-0.89
310	36.42	0	9.25847	0	0	0	0	0	37.0637	1	0	0	0	1	0	0.0552823	0	0	3.15281	0	0	0	0	0	0	-0.87
314	206.07	12.5999	45.9821	0	1	1	0	9.516	0	1	0	0	0	0	1	0.0416685	0	0	0	0	0	2	0	0	0	-0.83
317	63.91	13.3286	26.667	0	1	0	1	0	51.7734	1	0	0	0	0	0	0.0502782	0	0	0	0	0	0	0	0	0	-0.8
319	71.5	12.9648	33.0166	0	1	0	1	10.162	69.9763	1	0	5.57918	1	0	0	0.0539767	0	0	0	0	0	0	0	0	0	-0.8
321	92.86	10.9901	15.9465	1	1	0	0	9.00614	63.1944	1	0	0	0	0	0	0.0557711	0	0	0	0	0	0	0	0	0	-0.8
324	120.24	11.5671	39.4799	0	1	0	1	0	0	1	1	0	0	0	0	0.0666494	0	0	2.65369	0	0	0	0	0	0	-0.79
329	118.03	13.5388	56.0811	0	1	1	1	10.7891	122.409	1	1	0	0	0	0	0.0580972	0	0	3.10635	0	0	0	0	0	0	-0.74
333	87.89	0	22.9396	0	1	0	0	9.47355	59.1543	1	0	0	0	0	0	0.0418964	0	1	3.21168	0	0	0	0	0	0	-0.72
335	85.49	12.1654	35.1717	0	1	0	1	0	107.528	1	1	0	0	0	0	0.0551961	0	0	0	0	0	0	0	0	0	-0.71
336	57.36	0	4.13613	0	0	0	0	0	14.7655	0	0	0	0	0	0	0.0396658	0	1	2.85148	0	0	0	0	0	0	-0.71
338	64.33	12.3937	33.8823	1	1	0	0	10.174	0	1	0	0	1	0	0	0.0651344	0	0	0	0	0	0	0	0	0	-0.7
347	78.01	10.9155	16.9012	0	1	0	0	8.95777	63.3242	1	0	0	0	0	0	0.0797475	1	0	3.08613	0	0	0	0	0	0	-0.67
349	86.53	10.7098	15.932	0	1	0	0	0	63.3242	1	1	0	0	0	0	0.0789605	0	0	3.0496	0	0	0	0	0	0	-0.67
352	80.93	12.4205	22.8165	0	1	0	1	0	84.542	1	0	5.21301	0	0	0	0.043045	0	0	0	0	0	0	0	0	0	-0.66
356	69.06	11.5533	35.5681	0	1	0	1	0	229.942	1	0	0	0	0	0	0.0525473	0	1	0	0	0	0	0	0	0	-0.63
363	49.41	11.8779	10.1548	0	0	0	1	0	20.6272	1	0	0	0	0	0	0.0743214	0	0	2.70898	0	0	0	0	0	0	-0.6
369	131.19	12.5743	37.832	0	1	1	1	11.1966	128.637	1	0	0	0	0	0	0.0745708	0	0	2.7448	0	0	0	0	0	0	-0.56
378	61.77	10.023	8.58719	0	0	0	1	0	0	1	0	0	0	0	0	0.0632948	0	0	2.3708	0	0	0	0	0	0	-0.52
380	43.78	13.955	28.1686	0	1	1	1	9.9942	102.068	1	0	0	0	0	0	0.0559387	0	0	0	0	0	0	0	0	0	-0.51
381	40.62	12.8694	17.8914	0	0	0	1	0	63.2135	1	0	0	0	0	0	0.04294	0	0	0	0	0	0	0	0	0	-0.5
383	66.56	10.6866	16.4629	1	1	0	0	8.76352	0	1	0	0	0	0	0	0.0698778	0	0	0	0	0	0	0	0	0	-0.5
388	108.17	10.842	7.16753	0	0	0	1	0	24.9595	1	0	0	0	0	0	0.0277616	0	1	0	0	0	0	0	0	0	-0.47
389	80.47	11.1266	24.4481	0	1	0	1	0	0	1	0	0	1	0	0	0.0835366	0	0	0	0	0	0	0	0	0	-0.47
391	53.09	12.5838	28.9262	0	1	0	1	0	0	1	1	0	1	0	0	0.0586037	0	0	0	0	0	0	0	0	0	-0.46
395	52.57	11.3695	18.5282	0	1	0	1	9.9736	47.8328	1	0	0	0	0	0	0.0606445	0	0	2.699	0	0	0	0	0	0	-0.43
397	65.78	11.2294	23.4366	1	1	0	0	9.13223	0	1	0	0	0	0	0	0.0407129	0	0	0	0	0	1	0	0	0	-0.43
398	63.32	10.3983	7.11365	1	0	0	0	8.5475	22.9667	0	0	0	0	0	0	0.0938282	0	0	0	0	0	0	0	0	0	-0.43
399	110.45	11.3566	37.7257	0	1	1	0	0	0	1	0	0	0	0	0	0.0424374	0	0	3.07355	0	0	0	0	0	0	-0.42
400	104.89	12.2748	30.1068	0	1	0	1	10.3935	33.8711	1	0	0	0	0	1	0.0401933	0	0	0	0	0	0	0	0	0	-0.42
401	104.89	12.2966	30.4952	0	1	0	1	10.4301	35.2313	1	0	0	0	0	0	0.0550751	0	0	0	0	0	0	0	0	0	-0.42
402	70.67	12.3483	30.962	0	1	0	1	0	70.3975	1	0	0	0	0	0	0.0694339	0	0	3.64347	0	0	0	0	0	0	-0.42
407	53.09	12.7041	32.0027	0	1	0	1	0	0	1	1	0	0	0	0	0.0581224	0	0	0	0	0	0	0	0	0	-0.4
420	69.26	11.4478	18.082	0	1	0	1	0	50.3979	1	0	0	0	0	0	0.0374148	0	0	0	0	0	1	0	0	0	-0.31
423	75.27	11.087	15.7714	0	0	0	1	0	0	1	0	0	0	0	0	0.0557356	0	0	2.19819	0	0	0	0	0	0	-0.3
425	40.46	0	24.9062	0	1	0	0	9.66232	28.7057	0	0	0	0	0	0	0.0706714	0	0	0	0	0	0	0	0	0	-0.3
429	64.43	11.9828	16.2855	0	1	0	1	0	34.4672	1	0	0	1	0	0	0.0372255	0	1	0	0	44.7759	0	0	0	0	-0.3
433	81.42	12.145	22.0177	0	1	0	1	10.8331	25.9525	1	0	0	0	0	1	0.039648	0	0	0	0	0	0	0	0	0	-0.29
441	90.02	10.954	14.1057	0	1	0	1	0	128.743	1	1	5.76539	0	0	0	0.0391441	0	0	3.02427	0	0	0	0	0	0	-0.27
444	43.78	13.7838	37.8477	0	1	0	1	11.2172	0	1	0	0	0	0	1	0.0600594	0	0	0	1	0	0	0	0	0	-0.25
450	41.49	0	15.2732	0	0	0	0	9.77251	0	1	0	0	0	0	0	0.0587191	0	0	3.17511	0	0	0	0	0	0	-0.23
455	53.6	12.1164	25.9869	0	1	0	1	0	77.7941	1	0	0	0	0	0	0.0596184	0	0	3.66565	0	0	0	0	0	0	-0.22
457	70.38	0	24.7711	0	0	0	0	0	49.2633	1	1	0	0	0	0	0.0445493	0	1	3.39517	1	0	0	0	0	0	-0.22
458	101.88	0	16.706	0	0	0	0	9.25714	89.3858	1	0	0	0	0	0	0.0423249	0	1	3.35858	0	0	0	0	0	0	-0.22
461	37.3	10.7624	12.4848	1	1	0	0	8.85016	0	0	0	0	0	0	0	0.064849	0	0	0	0	0	0	0	0	0	-0.2
464	67.35	12.1286	18.1901	0	1	0	1	0	0	1	1	0	0	0	0	0.0603135	0	0	3.31927	0	0	0	0	0	0	-0.2
467	104.64	10.5408	11.0638	0	0	1	1	0	0	1	0	0	0	0	0	0.0532487	0	0	0	0	0	0	0	0	0	-0.19
484	75.27	10.7396	10.3997	0	0	0	1	0	0	0	0	0	0	0	0	0.0525749	0	0	2.09264	0	0	0	0	0	0	-0.14
488	26.3	9.59028	2.13662	0	0	0	0	0	0	0	0	0	0	0	0	0	0	0	0	0	0	0	0	0	0	-0.13
489	28.48	13.1613	31.8467	0	1	0	1	0	48.6836	1	0	0	0	0	0	0.0563814	0	0	0	0	0	0	0	0	0	-0.13
495	56.33	11.9177	15.1442	0	1	0	1	10.1519	0	1	0	0	0	0	0	0.0439767	0	0	2.74052	0	0	0	0	0	0	-0.1
496	76.82	12.7079	25.256	0	1	0	1	0	57.0802	1	0	0	0	0	0	0.0596133	0	0	3.12962	0	0	0	0	0	0	-0.1
504	64.43	12.7439	28.3352	0	1	0	1	0	71.7868	1	0	0	0	0	0	0.0460887	0	1	0	0	45.9643	0	0	0	0	-0.09
508	154.1	13.002	102.997	0	1	1	0	11.9761	223.214	1	1	0	0	0	2	0.0503959	0	0	0	0	0	0	0	0	0	-0.07
510	0	0	1.07735	0	0	0	0	0	0	0	0	0	0	0	0	0	0	0	0	0	0	0	0	0	0	-0.06
512	49.77	12.3624	19.9911	0	1	0	0	9.52867	52.1951	1	0	0	0	0	0	0.067374	0	0	0	0	72.0223	0	0	0	0	-0.06
517	34.03	11.9402	14.4365	0	0	0	1	0	0	1	0	0	0	0	0	0.0661768	0	0	3.43464	0	0	0	0	0	0	-0.05
518	34.03	11.7289	14.7713	0	0	0	1	0	0	1	0	0	0	0	0	0.0704229	0	0	3.44564	0	0	0	0	0	0	-0.05
522	54.69	0	27.5061	0	1	0	0	0	161.001	1	1	0	0	0	0	0.0488914	0	1	3.51296	0	0	0	0	0	0	-0.05
524	77.29	0	5.99266	0	0	0	0	0	26.9857	1	0	0	0	1	0	0.0721751	0	0	0	0	0	0	0	0	0	-0.04
530	48.99	12.2228	24.3406	0	1	0	1	0	0	1	0	0	0	0	0	0.0607812	0	0	2.89998	1	0	0	0	0	0	-0.03
537	17.07	10.0437	4.00537	0	0	0	0	0	0	0	0	0	0	0	0	0.176031	0	0	0	0	0	0	0	0	0	-0.01
544	0	0	0	0	0	0	0	0	0	0	0	0	0	0	0	0	0	0	0	0	0	0	0	0	0	0
545	52.05	0	13.246	0	0	0	0	0	35.0544	1	0	5.38718	0	0	0	0.0425026	0	0	0	0	0	0	0	0	0	0
553	63.57	12.4035	13.9358	0	0	0	1	0	0	1	0	0	0	0	0	0.037798	0	0	2.97639	0	36.3637	0	0	0	0	0
555	12.53	0	0.996285	0	0	0	0	0	0	0	0	0	0	0	0	0	0	0	0	0	0	0	0	0	0	0.01
556	75.27	11.0389	18.6011	0	1	0	1	0	0	1	0	0	0	0	0	0.0667187	0	0	2.1938	0	0	0	0	0	0	0.02
558	47.58	0	0.16	0	0	0	0	0	0	0	0	0	0	0	0	0	0	0	0	0	0	0	0	0	0	0.03
565	0	0	1.91981	0	0	0	0	0	0	0	0	0	0	0	0	0	0	0	0	0	0	0	0	0	0	0.04
570	55.43	12.6063	24.3001	0	1	0	1	0	56.7506	1	1	0	0	0	0	0.0446637	0	0	0	0	0	1	0	0	0	0.06
573	20.23	0	5.53159	0	0	0	0	8.82639	0	0	0	0	0	0	1	0	0	0	0	0	0	0	0	0	0	0.07
581	75.27	10.9537	15.2548	0	1	0	1	0	0	1	0	0	0	0	0	0.0600485	0	0	2.16864	0	0	0	0	0	0	0.09
591	49.41	11.3496	15.5384	0	0	0	1	0	0	1	0	0	0	0	0	0.0650028	0	0	2.42416	0	0	0	0	0	0	0.1
593	37.39	0	23.7147	0	1	0	0	0	65.06	1	1	0	0	0	0	0.0699375	0	0	3.40665	0	0	0	0	0	0	0.1
595	51.11	0	27.4002	0	1	0	0	0	81.0941	1	1	0	0	0	0	0.0556511	0	0	3.68993	0	0	0	0	0	0	0.11
596	59	12.6529	25.1749	0	0	0	0	11.7489	20.2859	1	0	0	0	0	1	0.0490116	0	0	0	0	0	0	0	0	0	0.11
598	54.9	11.9311	31.0188	0	1	0	1	0	0	1	0	0	0	0	0	0.0542861	0	0	0	0	0	0	0	0	0	0.11
602	26.3	9.98042	4.42985	0	0	0	0	0	0	0	0	0	0	0	0	0.0819303	0	0	0	0	0	0	0	0	0	0.12
605	54.46	12.1386	18.4595	0	1	0	1	0	0	1	1	0	0	0	0	0.0622219	0	0	3.43038	0	0	0	0	0	0	0.13
607	58.36	11.8373	14.9994	0	0	0	1	0	0	1	1	0	0	0	0	0.0673466	0	0	2.86468	1	0	0	0	0	0	0.14
608	68.18	12.778	28.0217	0	1	1	1	0	100.915	1	1	0	0	0	0	0.0479762	0	0	2.90994	0	0	0	0	0	0	0.15
611	39.68	11.5606	25.1083	0	1	0	1	0	87.5162	1	0	0	1	0	0	0.0644868	0	0	0	0	0	0	0	0	0	0.16
614	58.04	0	17.634	0	0	0	0	0	0	1	0	0	0	0	0	0.0479076	0	0	0	0	0	0	0	0	0	0.18
615	73.56	11.7783	20.2173	0	1	0	0	0	59.5622	1	0	0	0	0	0	0.0463626	0	0	0	0	0	0	0	0	0	0.18
621	20.23	0	4.59003	0	0	0	0	8.19736	0	0	0	0	0	0	0	0.180902	0	0	0	0	0	0	0	0	0	0.2
626	0	0	0	0	0	0	0	0	0	0	0	0	0	0	0	0	0	0	0	0	0	0	0	0	0	0.2
632	62.3	12.4239	20.3229	0	1	0	0	9.55779	48.8418	1	0	0	0	0	0	0.0564827	0	0	0	0	68.3154	0	0	0	0	0.23
635	75.27	11.0719	20.3111	0	1	0	1	0	0	1	0	0	0	0	0	0.0697758	0	0	2.20293	0	0	0	0	0	0	0.24
637	32.34	11.3284	17.3421	0	1	0	1	0	45.7911	1	0	0	0	0	0	0.0656883	0	0	2.88071	0	0	0	0	0	0	0.25
641	89.6	11.6422	18.3113	0	1	0	0	0	0	1	0	0	0	0	0	0.0433846	0	0	3.39198	0	0	1	0	0	0	0.27
643	0	0	7.00276	0	0	0	0	0	0	0	0	0	0	0	0	0.0903417	0	0	0	0	0	0	0	0	0	0.27
646	34.36	13.0617	19.5978	0	0	0	0	0	81.4668	1	0	0	0	0	0	0.0521984	0	0	0	0	0	1	0	0	0	0.28
649	41.99	13.4668	23.2936	0	0	0	1	0	0	1	0	0	0	0	0	0.0465097	0	0	3.24422	0	0	0	0	0	0	0.3
655	55.63	0	18.7553	0	0	0	0	0	63.3919	1	0	0	0	0	0	0.0435876	0	1	3.49497	0	0	0	0	0	0	0.3
656	9.23	0	9.00248	0	0	0	0	0	0	0	0	0	0	0	0	0.0257384	0	0	0	0	0	0	0	0	0	0.3
659	21.7	0	19.7747	0	1	0	0	0	66.4896	1	0	0	0	0	0	0.0616979	0	0	0	0	0	0	0	0	0	0.31
674	114.1	11.5647	21.5315	0	1	0	1	0	0	1	0	0	0	0	0	0.0429394	0	0	2.54884	0	0	0	0	0	1	0.36
677	39.08	0	17.8465	0	1	0	0	0	44.0041	1	0	0	0	0	0	0.0464691	0	1	3.39787	0	0	0	0	0	0	0.36
683	65.28	0	15.2778	0	0	0	0	9.76701	0	1	0	0	0	0	0	0.0520681	0	0	3.19149	0	0	0	0	0	0	0.38
684	36.42	0	9.27506	0	0	0	0	0	36.0911	1	0	0	0	1	0	0.0524641	0	0	3.08891	0	0	0	0	0	0	0.38
686	50.72	0	21.0224	0	1	0	0	9.80308	0	1	0	0	0	0	0	0.0639392	0	0	3.18771	0	0	0	0	0	0	0.39
688	21.26	0	14.5557	0	0	0	0	0	21.2151	1	0	0	0	0	0	0.0517136	0	0	3.49466	0	27.318	0	0	0	0	0.39
693	26.3	10.0319	4.80511	0	0	0	0	0	0	0	0	0	0	0	0	0.0829818	0	0	0	0	0	0	0	0	0	0.4
699	100.59	11.4715	29.1067	1	1	0	0	9.34119	0	1	0	0	0	0	0	0.0427143	0	0	3.29999	0	0	1	0	0	0	0.41
708	26.3	10.126	6.04835	0	0	0	0	0	0	0	0	0	0	0	0	0.0710052	0	0	0	0	0	0	0	0	0	0.45
711	43.86	12.2828	28.4179	0	1	0	1	0	91.7066	1	0	0	1	0	0	0.0572296	0	0	0	0	0	1	0	0	0	0.46
714	33.2	12.8876	21.3759	0	0	0	1	0	0	1	0	0	0	0	0	0.0461643	0	0	0	0	0	0	0	0	0	0.48
716	24.5	0	37.7459	0	1	0	0	0	0	1	0	0	0	0	0	0.061578	0	0	4.05861	0	0	0	0	0	0	0.48
723	28.6	0	15.2033	0	1	0	0	0	0	1	0	0	0	0	0	0.0535244	0	0	0	0	0	0	0	0	0	0.5
725	0	0	9.36685	0	0	0	0	0	0	0	0	0	0	0	0	0.206066	0	0	0	0	0	0	0	0	0	0.52
727	39.72	0	19.2777	0	1	0	0	0	55.5008	1	0	0	1	0	0	0.0542346	0	0	3.42513	0	0	0	0	0	0	0.52
733	0	0	4.2305	0	0	0	0	0	0	0	0	0	0	0	0	0	0	0	0	0	0	0	0	0	0	0.56
734	69.02	12.9183	31.4004	0	0	0	1	0	0	1	0	0	0	0	0	0.0612437	0	0	3.2736	0	0	0	0	0	0	0.56
736	3.24	0	9.9249	0	0	0	0	0	0	1	0	0	0	0	0	0.0705435	0	0	0	0	0	0	0	0	0	0.57
740	70.95	0	28.1788	0	1	1	0	10.4235	0	1	0	0	1	0	0	0.0539741	0	0	3.06569	0	0	0	0	0	0	0.57
741	36.42	0	15.9556	0	0	0	0	0	39.488	1	0	0	0	1	0	0.10937	0	0	3.15963	0	0	0	0	0	0	0.58
745	55.84	12.1885	20.1773	0	1	0	0	0	51.7597	1	0	0	0	0	0	0.060756	0	0	0	0	73.1762	0	0	0	0	0.6
748	23.55	12.2949	25.9722	0	1	0	1	0	0	1	0	0	0	0	0	0.0761011	0	0	0	0	0	0	0	0	0	0.6
753	0	0	12.4256	0	0	0	0	0	0	0	0	0	0	0	0	0.140615	0	0	0	0	0	0	0	0	0	0.61
756	46.18	0	27.3543	0	1	0	0	0	64.5404	1	0	0	0	0	0	0.0659099	0	0	3.69828	0	0	0	0	0	0	0.62
759	45.15	0	25.5097	0	0	0	0	10.5883	0	1	0	0	1	0	0	0.0458925	0	0	3.01121	0	0	0	0	0	0	0.63
762	25.36	0	15.6535	0	0	0	0	0	0	1	0	0	0	0	0	0.0509202	0	0	0	0	0	0	0	0	0	0.64
770	48.83	0	24.0329	0	1	0	0	8.79486	0	1	0	0	0	0	0	0.0621009	0	0	0	0	63.7796	0	0	0	0	0.7
777	48.83	0	27.4714	0	1	0	0	10.2916	72.0141	1	0	0	1	0	0	0.0675558	0	0	0	0	0	0	0	0	0	0.78
781	56.84	0	19.2702	0	1	0	0	0	0	1	0	0	1	0	0	0.0532175	0	0	0	0	0	1	0	0	0	0.79
784	47.1	13.2203	39.317	0	1	0	1	0	230.116	1	0	0	0	0	0	0.0642173	0	0	0	0	0	0	0	0	0	0.81
786	26.02	0	6.47372	0	0	0	0	0	0	1	0	0	0	0	0	0.0552996	0	0	0	0	0	0	0	0	0	0.81
787	32.7	0	20.3225	0	0	0	0	11.572	0	1	0	0	0	0	1	0.0497401	0	0	0	0	32.0839	0	0	0	0	0.82
790	20.31	11.9087	17.0819	0	1	0	0	0	0	1	0	0	1	0	0	0.0766366	0	0	0	0	0	1	0	0	0	0.83
793	23.47	0	25.9165	0	0	0	0	11.7745	112.36	1	0	0	0	0	1	0.0751761	0	0	0	0	0	0	0	0	0	0.85
799	32.78	11.6518	14.8484	0	0	0	1	0	0	1	0	0	0	0	0	0.0497888	0	0	0	0	0	0	0	0	1	0.88
819	6.48	0	15.9182	0	0	0	0	0	0	1	0	0	0	0	0	0.0543267	0	0	0	0	28.1286	0	0	0	0	0.99
824	12.47	0	15.8058	0	0	0	0	0	0	1	0	0	0	0	0	0.0493005	0	0	0	0	44.4245	0	0	0	0	1
830	12.47	0	16.3173	0	0	0	0	0	22.7902	1	0	0	0	0	0	0.0530229	0	0	0	0	29.5203	0	0	0	0	1.03
831	32.7	0	20.0767	0	0	0	0	11.5289	0	1	0	0	0	0	1	0.0501866	0	0	0	0	32.6215	0	0	0	0	1.03
834	0	0	11.3224	0	0	0	0	0	0	0	0	0	0	0	0	0.19269	0	0	0	0	0	0	0	0	0	1.05
835	3.24	0	15.4078	0	0	0	0	0	0	1	0	0	0	0	0	0.0506708	0	0	0	0	44.4245	0	0	0	0	1.06
839	12.03	0	11.8782	0	0	0	0	0	0	1	0	0	0	0	0	0.136046	0	0	3.31221	0	0	0	0	0	0	1.08
840	42.32	0	30.4049	0	1	0	0	0	81.0054	1	0	0	1	0	0	0.0531935	0	1	3.71476	0	0	0	0	0	0	1.1
842	36.26	0	17.997	0	0	0	0	0	0	1	0	0	0	0	0	0.074051	0	0	0	0	0	0	0	0	0	1.13
853	6.48	0	17.4378	0	0	0	0	0	0	1	0	0	0	0	0	0.0791348	0	0	0	0	0	0	0	0	0	1.38
855	40.54	12.1764	23.8003	0	1	1	0	10.8882	0	1	0	0	1	0	1	0.064805	0	0	0	0	0	1	0	0	0	1.38
856	11.41	0	27.1346	0	0	0	0	0	0	1	0	0	1	0	0	0.0637704	0	0	0	0	0	0	0	0	0	1.4
858	8.17	0	28.8692	0	0	0	0	0	0	1	0	0	1	0	0	0.0665887	0	0	0	0	0	0	0	0	0	1.44
861	31.64	0	30.0474	0	1	0	0	9.06718	0	1	0	0	1	0	0	0.0644125	0	0	0	0	0	0	0	0	0	1.5
862	12.03	0	17.5293	0	0	0	0	0	0	1	0	0	0	0	0	0.0619935	0	0	3.40544	1	0	0	0	0	0	1.6
864	160.83	13.3851	50.6899	0	1	1	0	10.5666	134.71	0	0	0	0	0	0	0.0434542	0	0	0	0	0	0	0	0	0	-1.5
867	121.38	0	10.5186	0	0	0	0	8.34332	0	0	0	0	0	0	0	0.0559341	0	0	0	0	0	0	0	0	0	-1.6
870	88.89	0	13.1614	0	0	0	0	0	56.9188	1	1	0	0	1	0	0.0854311	0	1	2.4637	0	0	0	0	0	0	-1.4
872	203.06	11.9442	103.204	0	1	1	0	9.98754	265.177	0	0	0	0	0	1	0.0657852	0	0	0	0	0	0	0	0	0	-1.2
874	90.37	11.4514	11.0626	0	0	0	1	8.89611	38.6924	1	0	0	0	0	0	0.0477348	0	0	0	0	0	0	0	0	0	-1.2
877	74.57	11.2105	19.2315	1	1	0	0	9.15058	0	1	0	0	0	0	0	0.0442005	0	0	3.20811	0	0	1	0	0	0	-1.1
883	84.32	11.168	13.9207	0	0	0	1	8.85893	44.9924	1	0	0	0	0	0	0.0434183	0	0	2.11852	0	0	0	0	0	0	-0.85
885	119.05	11.3751	9.72846	0	0	0	1	8.5587	31.3195	1	0	0	0	1	0	0.0326696	0	1	2.73067	0	0	0	0	0	0	-0.8
889	84.39	12.9566	32.75	0	1	0	1	10.1569	69.9763	1	0	5.32918	1	0	0	0.0523868	0	0	0	0	0	0	0	0	0	-0.7
891	37.61	12.2613	18.1126	0	1	0	1	0	46.9571	1	0	0	0	0	0	0.0421359	0	1	0	0	0	0	0	0	0	-0.48
896	31.23	0	27.5917	0	1	0	0	0	0	1	0	0	0	0	0	0.0769387	0	0	0	0	0	0	0	1	0	-0.4
898	49.33	10.5245	5.05927	0	0	0	1	8.87809	0	0	0	0	0	0	0	0.0467517	0	0	2.58194	0	0	0	0	0	0	-0.3
905	42.43	12.0309	26.0956	0	1	0	1	0	0	1	0	0	0	0	0	0.0538219	0	0	0	0	62.4489	0	0	0	0	-0.3
918	104.64	10.4559	13.984	0	0	1	1	0	0	1	0	0	0	0	0	0.0800174	0	0	0	0	0	0	0	0	0	-0.15
919	17.07	9.44444	1.82033	0	0	0	0	0	0	0	0	0	0	0	0	0	0	0	0	0	0	0	0	0	0	-0.15
925	58.2	11.5727	11.1517	0	0	0	1	0	48.5397	1	0	0	0	0	0	0.0400779	0	0	2.31569	0	0	0	0	0	0	-0.1
932	61.82	11.4893	8.39796	0	0	0	1	0	24.7694	1	0	0	0	0	0	0.0350281	0	1	0	0	0	0	0	0	0	-0.1
934	72.83	11.6691	40.053	0	1	0	0	9.89344	0	0	0	0	0	0	0	0.0685121	0	0	0	0	0	0	0	0	0	-0.07
937	80.05	12.2488	26.4245	0	1	0	1	0	156.977	1	0	5.79712	0	0	0	0.0789023	0	0	2.94252	0	0	0	0	0	0	-0.01
943	75.27	10.9618	15.8446	0	0	0	1	0	0	1	0	0	0	0	0	0.0557545	0	0	2.16545	0	0	0	0	0	0	0.04
947	9.23	0	1.63683	0	0	0	0	0	0	0	0	0	0	0	0	0.0680414	0	0	0	0	0	0	0	0	0	0.1
950	59.14	0	13.3946	0	1	0	0	9.45174	32.9454	1	0	0	0	0	0	0.0654545	0	0	0	0	0	0	0	0	0	0.2
951	32.34	11.4738	17.5977	0	1	0	1	0	40.0719	1	0	0	0	0	0	0.0650262	0	0	2.92318	0	0	0	0	0	0	0.2
953	9.23	0	6.25593	0	0	0	0	0	0	0	0	0	0	0	0	0.133631	0	0	0	0	0	0	0	0	0	0.2
967	0	0	1.66667	0	0	0	0	0	0	0	0	0	0	0	0	0.06415	0	0	0	0	0	0	0	0	0	0.4
968	0	0	2.7859	0	0	0	0	0	0	0	0	0	0	0	0	0.0667972	0	0	0	0	0	0	0	0	0	0.4
970	30.18	0	17.0131	0	0	0	0	0	37.314	1	0	0	0	0	0	0.0411258	0	1	0	0	45.4686	1	0	0	0	0.4
975	32.67	12.0245	13.4275	0	0	0	1	0	0	1	0	0	0	0	0	0.0450473	0	0	0	0	48.3906	1	0	0	0	0.5
978	23.47	0	24.633	0	1	0	0	9.86526	0	1	0	0	0	0	0	0.064953	0	0	0	0	0	0	0	0	0	0.54
980	23.55	12.5163	22.5617	0	1	0	1	0	0	1	0	0	0	0	0	0.065186	0	0	0	0	0	0	0	0	0	0.6
981	41.93	0	23.0742	0	0	0	0	10.5542	19.302	1	0	0	0	0	0	0.0503621	0	0	0	0	0	0	0	0	0	0.6
987	43.07	0	17.7599	0	0	0	0	0	37.314	1	0	0	0	0	0	0.0425091	0	0	0	1	45.4686	1	0	0	0	0.7
992	0	0	4.09272	0	0	0	0	0	0	0	0	0	0	0	0	0.353553	0	0	0	0	0	0	0	0	0	0.8
993	0	0	5.31294	0	0	0	0	0	0	0	0	0	0	0	0	0.25	0	0	0	0	0	0	0	0	0	0.8
996	38.33	11.9495	13.8655	0	0	0	0	0	0	1	0	0	0	0	0	0.0653497	0	0	3.43206	0	0	0	0	0	0	0.88
1000	0	0	5	0	0	0	0	0	0	0	0	0	0	0	0	0.176777	0	0	0	0	0	0	0	0	0	0.9
1002	12.47	0	23.0094	0	1	0	0	0	0	1	0	0	0	0	0	0.0515142	0	0	0	0	0	0	0	0	0	0.92
1007	29.26	0	14.612	0	0	0	0	0	0	1	0	0	0	0	0	0.053972	0	0	0	0	36.6998	0	0	0	0	1.1

## Sheet: Sheet3_q-RASAR Model
Values of descriptors (q-RASAR PLS Model) in the training and test sets
		Training set
Name	RA function(LK)	Abs MaxPos-MaxNeg	TPSA(NO)	Eta_C	D/Dtr05	B05[C-N]	logBB
1	-1.87743	0.151802	206.3	34.5359	113.138	1	-2.52
2	-2.07185	0.950542	149.15	39.805	36.1655	1	-2.15
3	-2.13115	0.95055	149.15	40.0824	36.843	1	-2.09
4	-0.715812	0.0150793	78.94	28.5098	0	1	-1.88
5	-1.6932	0.31392	117.51	21.6479	96.7633	1	-1.82
6	-1.69402	1	117.51	23.4755	102.995	1	-1.82
7	-1.50774	0.0039719	189.53	26.7929	67.2453	0	-1.7
8	-0.682196	0.153084	128.33	28.3259	0	1	-1.67
11	-0.755921	0.154092	110.43	26.1266	72.7611	1	-1.52
12	-0.248775	0.000430267	220.15	97.4078	82.18	1	-1.52
13	-0.458005	2.07334e-08	555.44	244.363	0	1	-1.48
14	-0.611532	0.0244522	84.93	13.6037	56.9188	1	-1.42
15	-0.827875	0.0019822	112.9	36.3963	81.5712	1	-1.4
16	-0.544213	0.00563545	70.16	10.3578	0	0	-1.33
19	-1.22662	0.976888	93.03	11.9244	68.6508	1	-1.3
20	-0.943442	0.154977	86.26	15.8137	67.9439	1	-1.23
21	-1.20217	0.906609	86.59	17.342	72.5097	1	-1.23
23	-1.04987	0.030773	53.43	20.8677	83.1704	1	-1.14
24	-1.08868	0.838462	86.59	18.1556	144.593	1	-1.12
25	-0.927773	0.877624	57.36	17.0742	102.798	1	-1.01
26	0.388225	0.993098	170.06	121.961	109.486	0	-1
27	-0.263883	0.214192	74.87	24.6292	82.0971	1	-1
29	-0.479324	0.104774	92.95	25.7654	82.4786	1	-1
31	-0.747486	0.777241	76.07	34.3088	0	1	-0.92
32	-0.712379	0.000146839	91.48	34.1895	103.725	1	-0.89
33	-0.183026	0.666195	60.85	25.3394	0	1	-0.89
34	-0.0193379	0.176961	93.45	17.9313	0	1	-0.85
35	-0.849756	0.776518	76.07	32.3399	0	1	-0.81
36	-0.474117	0.632178	63.6	7.00204	0	0	-0.8
38	-0.331872	0.0274025	93.7	30.9704	0	1	-0.8
40	-0.34997	0.0220448	278.8	191.749	0	1	-0.78
41	-0.34997	0.0220448	278.8	191.749	0	1	-0.78
42	-0.340275	0.0220448	278.8	191.765	0	1	-0.78
44	-0.74433	0.857843	44.2	22.2246	171.418	1	-0.73
45	-0.589473	0.898955	132.56	15.9911	52.4019	1	-0.72
48	-0.699736	0.00017168	145.78	64.4624	391.79	1	-0.7
49	-0.13545	0.817345	63.95	36.1939	0	1	-0.7
50	-0.67598	0.56588	78.64	12.1434	41.9924	1	-0.69
52	0.108718	0.00296876	104.08	4.43133	0	0	-0.67
53	-0.670535	0.834835	83.1	16.5524	63.3242	1	-0.67
54	-0.160383	0.169116	64.09	20.0075	82.6731	1	-0.66
55	0.118938	0.0786983	58.64	34.5384	0	1	-0.66
56	-0.529195	0.812021	83.1	12.9963	60.1992	1	-0.66
57	-0.639912	0.999638	104.7	52.2427	513.322	1	-0.64
58	-0.219479	0.0800626	72.19	17.7013	73.3549	1	-0.62
59	0.61173	0.0871484	62.16	26.7438	20.2859	1	-0.6
60	0.0896078	0.051987	94.81	16.9063	0	1	-0.59
61	-0.328866	0.679359	46.5	27.8482	195.546	1	-0.59
63	0.150467	0.587986	62.16	28.2183	0	1	-0.57
66	-0.351494	0.0015331	164.63	38.6812	0	1	-0.52
67	-0.40568	0.183931	61.72	23.2978	74.3492	1	-0.52
68	0.404402	4.29748e-06	72.3	26.0988	76.3058	1	-0.52
69	0.0560534	0.0801919	58.2	13.8359	0	1	-0.51
70	-0.557835	0.981577	37.3	23.9114	0	0	-0.49
71	-0.557835	0.981577	37.3	23.9114	0	0	-0.49
72	-0.606977	0.00263066	111.5	41.8545	93.6469	1	-0.46
73	-0.744873	0.00201112	101.82	27.8129	138.269	1	-0.4
74	-0.794601	0.00184912	77.25	14.7322	53.3209	1	-0.4
75	-0.379958	0.999966	41.03	10.961	0	0	-0.38
76	-0.825465	0.106828	79.31	35.2671	0	1	-0.37
77	-0.141605	0.00476825	69.39	17.1841	0	1	-0.34
78	-0.221648	0.371694	55.62	12.9054	0	1	-0.34
79	-0.0639998	0.145039	33.2	8.08131	32.1532	1	-0.32
80	0.134123	0.0281902	221.29	100.232	0	1	-0.3
81	-0.397744	0.0780333	85.84	19.122	87.1224	1	-0.3
82	0.454753	0.00207809	78.14	16.9942	0	1	-0.3
83	-0.0713778	0.318513	65.34	7.51815	22.5214	1	-0.29
84	0.000992179	0.436332	65.01	8.28084	22.5214	1	-0.29
86	-0.310102	0.621176	86.01	17.7572	71.7172	1	-0.28
88	-0.232135	0.878775	43.86	32.3021	182.487	1	-0.25
89	-0.0976878	0.403482	43.09	3.45908	0	1	-0.24
90	-0.086651	0.686934	85.61	18.512	0	1	-0.22
92	-0.555944	0.000200394	101.88	16.706	89.3858	1	-0.22
93	-0.317173	0.0194861	60.69	3.54223	0	0	-0.21
94	0.146317	0.00140029	27.05	20.0457	143.608	1	-0.2
96	-0.893183	0.456564	37.3	12.4848	0	0	-0.18
97	-0.287115	0.881811	94.83	36.2768	37.4146	0	-0.18
98	-0.753609	0.4137	68.17	23.6075	0	1	-0.17
99	-0.133903	0.658196	63.32	3.23236	0	0	-0.17
100	-0.17548	0.985934	64.63	20.0662	0	1	-0.17
104	-0.12861	0.127407	81.93	18.518	60.5209	1	-0.12
107	0.366963	0.0927443	81.99	13.6171	45.636	1	-0.1
108	-0.176746	0.99963	169.52	63.3233	0	1	-0.09
109	-0.176746	0.99963	169.52	63.3233	0	1	-0.09
110	-0.359522	0.14962	46.92	23.7568	49.8956	1	-0.08
111	-0.588528	0.664936	60.85	22.4962	0	1	-0.08
112	0.275754	0.491552	40.16	24.0213	0	1	-0.07
113	0.240802	0.0392146	52.83	19.4307	86.3794	1	-0.06
114	-0.126194	0.21015	56.22	9.73604	24.7694	1	-0.06
115	0.104004	0.198782	67.15	16.0538	0	1	-0.05
116	-0.711597	0.760405	128.95	15.5349	52.4019	1	-0.05
118	0.213962	0.0701237	43.86	30.7789	95.3066	1	-0.01
119	0.0634647	0.0358377	176.61	41.4593	0	1	0
121	-0.909266	0.0274364	110.85	11.8321	57.8919	1	0
122	-0.0370206	0.081352	82.15	18.0181	0	1	0
124	0.0863323	0.00661155	145.44	43.2545	0	1	0
125	0.626664	0.0934674	54.77	36.2642	102.372	1	0.01
127	-0.376029	0.000422501	78.84	34.1973	180.785	1	0.02
128	-0.132694	0.0103431	48.38	0.507545	0	0	0.03
129	-0.109574	0.0201334	83.95	20.8083	0	1	0.04
130	-0.508259	0.0692847	103.78	10.0995	0	1	0.05
131	0.0793916	0.0298175	49.56	30.0765	59.1415	1	0.07
132	-0.226938	0.999998	154.1	102.997	223.214	1	0.07
133	0.336582	0.999993	44.81	18.1241	66.943	1	0.08
134	-0.286582	0.0326807	63.6	15.9239	0	0	0.09
135	-0.150294	0.02941	39.82	17.2346	22.5441	1	0.11
137	0.0824021	0.564403	75.27	16.1256	0	1	0.12
138	0.214795	0.662153	9.23	2.81812	0	0	0.13
139	0.214795	0.662153	9.23	2.81812	0	0	0.13
140	-0.324641	0.76669	57.53	3.13221	0	0	0.16
141	0.309705	0.400375	39.68	27.6156	91.4648	1	0.16
142	-0.0758433	0.670378	65.72	28.5814	0	1	0.17
143	0.355285	0.101154	50.72	18.8267	19.1001	1	0.18
144	-0.300369	0.0296848	221.29	102.182	0	1	0.19
148	0.370533	0.270254	93.18	25.7545	0	1	0.2
149	0.166081	0.603403	62.3	20.3229	48.8418	1	0.23
150	-0.50109	0.119213	61.72	26.841	81.8159	1	0.23
151	0.667565	0.890256	8.17	25.7069	0	1	0.24
152	0.756287	0.281129	55.04	17.5891	0	1	0.25
153	0.341563	0.0801632	0	5.65911	0	0	0.27
155	0.318771	0.000662828	39.82	18.0377	81.4668	1	0.28
156	0.210212	0.484699	29.1	23.6673	0	1	0.3
157	0.290553	0.995156	59.08	27.7386	0	1	0.3
158	0.290553	0.995156	59.08	27.7386	0	1	0.3
159	0.22727	0.39373	37.61	33.8553	96.756	1	0.3
161	0.102613	0.0779855	87.28	11.7058	0	1	0.32
162	0.740481	0.45049	39.19	22.2275	0	1	0.33
163	0.71275	0.441335	46.33	36.9464	0	1	0.34
164	-0.162365	0.0492348	70	23.4515	19.0831	1	0.35
165	0.337625	0.113383	0	6.44156	0	0	0.35
166	0.765005	0.511138	68.62	17.0394	0	1	0.38
167	0.891839	0.490779	21.26	14.5557	21.2151	1	0.39
168	0.663814	0.890691	42.52	22.3507	51.7342	1	0.39
171	-1.0017	0.999996	170.06	121.961	109.486	0	0.4
174	0.192558	0.589595	9.23	7.13025	0	0	0.42
175	0.47099	0.119796	35.82	7.43569	0	1	0.42
176	0.331228	0.739063	51.02	23.6598	33.5259	1	0.43
177	0.592662	0.444665	54.46	31.3391	0	1	0.48
178	-0.00291431	0.0371491	23.47	24.633	0	1	0.51
179	0.347316	0.0115108	32.67	18.2376	36.5389	1	0.51
180	-0.780021	1	278.8	191.765	0	1	0.52
181	-0.549562	8.02196e-05	125.23	57.7494	0	1	0.53
182	0.264028	0.33515	41.93	23.0742	19.302	1	0.55
183	0.264028	0.33515	41.93	23.0742	19.302	1	0.55
184	0.201809	0.715916	186.45	54.6454	0	1	0.56
185	0.201809	0.715916	186.45	54.6454	0	1	0.56
186	-0.0391291	0.106457	61.6	23.2552	0	1	0.56
187	0.0837139	0.234302	55.48	5.86717	0	1	0.56
188	0.542049	0.853628	38.77	24.1353	19.302	1	0.57
189	0.68191	0.994373	48.83	28.9228	75.4618	1	0.59
190	0.68191	0.994373	48.83	28.9228	75.4618	1	0.59
191	-0.200783	0.454687	58.36	12.6211	0	1	0.6
192	0.148292	0.00618412	61.92	23.2597	0	1	0.6
193	0.539639	0.996776	61.69	12.9003	0	1	0.61
194	0.67211	0.962814	33.2	28.2008	0	1	0.68
195	-0.0266714	0.00547311	63.41	20.1025	73.8579	1	0.71
196	0.981436	0.96443	41.93	28.4761	0	1	0.73
200	0.831732	0.00228958	12.47	29.6418	72.1364	1	0.75
201	-0.081135	0.00464218	58.36	18.1944	73.3549	1	0.77
202	0.58945	0.00860727	16.13	15.9691	64.6981	1	0.77
204	0.750467	0.464823	26.02	6.47372	0	1	0.81
205	0.854868	0.0343435	6.48	25.6667	0	1	0.83
206	0.766521	0.641965	6.48	15.5522	0	1	0.83
207	-0.10221	0.14755	58.36	17.6722	0	1	0.88
208	0.54887	0.962616	33.2	28.0808	0	1	0.89
209	0.53011	0.540423	35.58	31.636	0	1	0.9
211	0.577177	0.505588	54.38	14.1926	0	1	0.9
212	0.170643	0.0129614	24.94	29.2278	0	1	0.9
213	0.896839	0.881504	41.93	29.938	0	1	0.92
214	0.626676	0.745784	33.29	27.3421	0	1	0.98
215	0.484644	0.195587	52.65	31.1421	0	1	1
216	0.862712	0.332634	6.48	19.8011	0	1	1.04
217	0.339803	0.462945	41.57	31.1522	0	1	1.04
219	0.472807	0.553378	35.58	29.7257	0	1	1.08
221	0.69542	0.989549	42.52	24.0523	0	1	1.11
222	0.849193	0.942349	12.03	12.5691	17.8282	1	1.11
224	0.754137	0.964232	41.93	28.3864	0	1	1.25
225	0.480353	0.260036	23.47	25.5944	0	1	1.32
227	0.807282	1.31196e-05	23.55	23.0393	0	1	1.48
228	0.804576	0.619214	16.13	14.5041	0	1	1.53
229	-0.577707	1.41181e-07	73.1	16.9406	0	1	-2.15
230	-0.644884	0.0194866	120.73	8.41273	99.9769	1	-2.09
231	-1.33816	0.0039106	160.83	50.6899	134.71	0	-2
233	-0.999622	0.0144408	93.81	21.947	0	1	-1.96
234	-1.77513	0.00347282	83.56	25.9426	0	1	-1.9
235	-2.51033	0.151802	219.93	41.4953	115.13	1	-1.89
237	-1.69402	1	117.51	23.4755	102.995	1	-1.82
239	-1.73645	0.31392	117.51	25.4361	109.228	1	-1.82
240	-0.407261	0.000144827	66.84	10.5606	37.9405	0	-1.72
241	-0.834086	0.00566834	118.22	16.0474	0	0	-1.7
242	-0.468769	0.40945	37.3	11.5815	0	0	-1.68
243	-0.12604	0.103317	121.38	10.5186	0	0	-1.6
244	-1.12525	0.0030928	106.39	12.3642	53.0198	1	-1.57
245	0.0545144	0.600135	113.29	28.5196	0	0	-1.52
246	-0.202063	0.174426	85.97	25.5151	0	0	-1.52
247	-1.50288	0.999999	210.54	25.7284	0	1	-1.52
248	-1.52281	0.999999	210.54	25.7284	0	1	-1.5
249	-0.952922	0.967476	90.37	11.0626	38.6924	1	-1.5
250	-0.682492	0.728202	84.58	14.2581	0	1	-1.42
251	-0.889983	4.90538e-05	74.6	66.6339	0	0	-1.4
252	-1.38761	0.999597	89.75	22.4064	105.034	1	-1.4
253	-1.38761	0.999597	89.75	22.4064	105.034	1	-1.4
255	-0.121893	0.0013792	73.06	22.8394	72.6981	1	-1.4
258	-1.81786	0.361945	97.28	22.7146	96.7633	1	-1.34
259	-1.0848	0.443645	74.16	28.2704	108.459	1	-1.3
260	-1.23614	0.747806	68.53	19.7734	53.0987	1	-1.3
261	0.0206055	7.45797e-05	92.79	22.6552	0	1	-1.3
262	0.0450891	0.0348656	106.51	31.2487	97.808	1	-1.3
263	-0.58923	0.121195	91.54	19.965	0	1	-1.3
266	-1.27028	0.74775	66.84	21.2972	53.0987	1	-1.26
270	-1.14335	0.0146391	98.62	18.8107	76.973	1	-1.23
271	-1.19928	0.906432	86.59	17.9475	72.5097	1	-1.23
272	-1.20219	0.809482	86.26	18.0665	72.5097	1	-1.23
274	-0.30315	0	203.06	103.204	265.177	0	-1.23
275	-0.653336	0.0212958	59.39	40.5261	164.095	1	-1.22
276	-1.00634	0.537774	90.37	12.9169	41.6924	1	-1.22
277	-0.96775	0.0200788	103.31	9.38075	43.0722	1	-1.15
278	-0.386597	0.179536	77.32	37.0666	197.027	1	-1.15
280	-0.640326	0.41457	90.02	15.3167	134.633	1	-1.12
281	-0.801564	0.15563	101.73	20.7311	71.1929	1	-1.11
282	-1.08512	1	118.21	65.0231	241.291	1	-1.1
283	-1.08512	1	118.21	65.0231	241.291	1	-1.1
285	-1.17198	0.513278	87.05	26.2515	100.999	1	-1.1
286	0.353712	4.3977e-05	42.68	39.2904	75.3797	1	-1.08
287	-1.17521	0.513317	109.83	28.2016	100.58	1	-1.06
288	-0.908064	0.877624	57.36	17.0742	102.798	1	-1.04
289	-0.891465	0.92097	171.17	102.602	228.03	1	-1.03
290	-0.750329	0.448067	53.09	37.0513	0	1	-1
291	-1.1231	0.0219113	88.52	26.8854	0	1	-1
292	-0.270067	0.0971645	82.81	25.5198	0	1	-1
293	-0.77419	0.245665	99.61	18.9432	0	1	-1
294	0.302894	0.328544	72.5	20.5068	56.1608	1	-1
295	-0.0836185	0.0771657	101.22	16.3718	0	1	-1
296	0.0691827	0.0758891	52.02	7.7036	0	1	-1
298	-0.0851562	0.071106	77.98	19.4601	76.7397	1	-1
300	-0.419228	0.0222675	71.78	20.1944	0	1	-1
301	-0.74743	0.574412	73.4	37.7457	0	1	-1
302	0.0545902	0.00542765	61.8	15.8368	65.4095	1	-1
303	0.235493	0.0059821	81.95	23.8239	0	1	-0.95
304	-0.349801	0.0381635	101.9	54.8978	0	1	-0.93
305	-0.711256	0.0142714	86.99	11.9238	34.2201	1	-0.92
306	-0.830916	0.0058243	106.95	21.5731	84.542	1	-0.9
307	-0.0820175	0.0344188	113.6	30.7493	0	1	-0.9
308	-0.116251	0.646634	91.67	34.3557	37.4146	0	-0.9
311	-0.465324	2.14395e-06	86.63	29.2172	187.48	1	-0.85
312	-0.617237	0.0688087	107.2	10.1421	0	1	-0.85
313	0.343461	0.358044	206.07	45.9821	0	1	-0.83
315	-0.388043	0.00131498	83.09	20.5332	51.7253	1	-0.82
316	-1.40421	0.00989322	135	15.8815	68.1379	1	-0.8
318	0.219532	0.0037938	83.09	28.8352	0	1	-0.8
320	-0.75062	0.963751	103.78	8.41069	0	1	-0.8
322	-0.979018	0.982147	110.6	13.8481	45.5924	1	-0.79
323	-0.479492	0.632178	63.6	7.00204	0	0	-0.79
325	-0.979018	0.982147	110.6	13.8481	45.5924	1	-0.79
326	0.495021	0.0370371	63.04	22.6928	75.041	1	-0.78
327	-0.778933	0.963751	103.78	8.41069	0	1	-0.77
328	-0.236554	0.582456	75.01	24.2811	0	1	-0.76
330	-1.0844	0.205868	90.02	24.8328	192.207	1	-0.73
331	-0.813781	0.212571	90.02	22.4112	181.705	1	-0.73
332	-0.744089	0.857762	44.2	22.5266	167.829	1	-0.73
334	-0.59607	0.934438	134.63	15.2899	52.4019	1	-0.72
337	0.117672	0.30946	42.35	24.0464	0	1	-0.7
339	0.12119	0.251098	50.41	8.72188	0	1	-0.7
340	-0.141425	0.0452461	74.22	49.508	0	0	-0.7
341	-0.635984	0.00738461	104.7	54.1802	531.746	1	-0.7
342	-0.880209	0.57835	76.88	31.2713	0	1	-0.7
343	0.259628	0.41888	50.16	22.1611	45.2242	1	-0.69
344	-0.22464	0.193085	111.96	34.9219	0	1	-0.67
345	-0.122309	0.0250204	84.39	32.71	70.3036	1	-0.67
346	-0.816825	0.00564587	143.72	12.8065	93.3254	1	-0.67
348	-0.670508	0.834835	86.53	15.945	63.3242	1	-0.67
350	-0.531724	0.0454109	72.19	11.5463	0	1	-0.66
351	-0.521646	0.813042	86.53	12.4236	60.1992	1	-0.66
353	0.115761	0.443064	36.42	9.25051	37.0637	1	-0.65
354	-0.639912	0.999638	104.7	52.2427	513.322	1	-0.64
355	0.680117	0.188417	72.74	33.6843	0	1	-0.64
357	-0.345401	0.00571149	70.89	40.4384	237.27	1	-0.63
358	-0.512161	0.909533	55.56	30.5087	179.727	1	-0.62
359	-0.512161	0.909533	55.56	30.5087	179.727	1	-0.62
360	-0.676984	0.688259	84.32	13.9207	44.9924	1	-0.6
361	0.0158981	0.342572	49.87	2.946	0	0	-0.6
362	0.0491865	0.0301162	53.09	31.0888	117.385	1	-0.6
364	-1.09953	0.0300465	97.98	62.1348	235.696	1	-0.59
365	-0.341488	0.0207762	66.56	12.8587	0	1	-0.59
366	0.529461	8.02058e-05	131.27	45.1536	0	1	-0.57
367	-0.559593	0.998066	131.19	37.832	128.637	1	-0.56
368	-0.559593	0.998066	131.19	37.832	128.637	1	-0.56
370	-0.220899	0.130622	43.86	32.42	95.79	1	-0.55
371	-0.71436	0.0213151	70.59	15.4942	0	1	-0.55
372	-0.188134	0.584401	63.32	10.4401	0	1	-0.54
373	-0.0192928	0.011713	35.58	20.0789	46.9571	1	-0.54
374	0.152968	0.178918	58.2	21.4966	0	1	-0.52
375	0.0903152	0.0176833	115.04	7.96618	37.7857	1	-0.52
376	-0.0160534	0.0286431	53.17	23.6128	137.739	1	-0.52
377	-1.51092	0.013274	70.67	27.3234	0	1	-0.52
379	-0.844224	0.0412035	47.16	17.988	63.2135	1	-0.52
382	-0.0831938	0.206657	74.6	36.3897	35.7918	0	-0.5
384	-0.557835	0.981577	37.3	23.9114	0	0	-0.49
385	-0.715473	0.678235	84.32	11.5914	41.6924	1	-0.48
386	0.0274769	0.0431801	31.23	17.3793	0	1	-0.48
387	-0.0503359	0.0996145	51.02	19.687	37.3189	1	-0.47
390	-0.497724	0.428814	41.57	18.5124	0	1	-0.46
392	-0.355278	0.94987	74.27	26.0363	0	1	-0.45
393	-0.355278	0.94987	74.27	26.0363	0	1	-0.45
394	-0.608509	0.00578126	86.63	7.11531	0	1	-0.44
396	-0.265312	0.00236315	43.86	34.9219	99.39	1	-0.43
403	-0.552392	0.000803311	117.69	12.068	36.0143	0	-0.41
404	0.0445052	0.00191663	23.79	0.815714	0	0	-0.4
405	-0.45553	0.301253	74.68	15.6408	0	1	-0.4
406	0.265398	0.00990465	80.39	4.77749	0	0	-0.4
408	-0.729291	0.115725	136.03	33.2856	72.8456	1	-0.39
409	0.0754508	0.0855317	63.69	28.9226	0	1	-0.39
410	0.0192666	0.00532677	42.08	10.765	0	0	-0.38
411	0.558854	0.00361577	29.54	57.4102	0	1	-0.37
412	0.926148	0.979024	36.26	20.2875	50.8803	1	-0.37
413	-0.263591	0.0435383	83.56	36.4041	102.985	1	-0.37
414	0.0596472	0.103716	67.35	18.1602	0	1	-0.37
415	0.444541	0.361206	23.55	23.3679	0	1	-0.36
416	-0.174122	0.0626774	46.33	16.2697	0	1	-0.34
417	-0.221648	0.371694	55.62	12.9054	0	1	-0.34
418	-0.198725	0.00859542	46.33	13.0323	0	1	-0.34
419	-0.037721	0.534174	51.27	31.5474	66.8979	1	-0.32
421	-0.222283	0.2312	58.86	12.0452	0	1	-0.3
422	-0.055079	0.121028	40.46	24.9062	28.7057	0	-0.3
424	-0.836586	0.0780333	77.05	21.117	90.8977	1	-0.3
426	-0.299997	0.999997	199.95	60.9822	0	1	-0.3
427	-0.299997	0.999997	199.95	60.9822	0	1	-0.3
428	-0.21899	0.358791	67.22	8.34441	21.9123	0	-0.3
430	-0.0853156	0.0497956	72.68	6.99131	21.9123	0	-0.3
431	-0.354418	0.197682	61.36	16.7657	0	1	-0.3
432	0.027344	0	0	0	0	0	-0.3
434	-0.495231	0.069966	81.42	22.6946	25.9525	1	-0.29
435	-0.494811	0.00542297	78.43	14.6351	0	1	-0.28
436	0.0687409	0.0111379	0	2.92799	0	0	-0.28
437	-0.322036	0.628187	89.77	16.1733	71.7172	1	-0.28
438	0.147604	0.285381	36.42	12.8114	39.488	1	-0.28
439	0.650801	0.310794	49.87	4.50542	0	0	-0.27
440	-1.04358	0.414854	90.02	15.6371	136.422	1	-0.27
442	-0.241621	0.973769	58.2	11.288	29.0762	0	-0.26
443	-0.230543	0.875817	43.86	32.1547	182.487	1	-0.25
445	-0.0934587	0.514137	64.43	20.4653	74.0998	1	-0.25
446	-0.253086	0.124663	111.96	45.8769	0	1	-0.24
447	-0.545511	0.402365	41.57	21.6123	0	1	-0.24
448	-0.0503732	0.0195058	63.64	6.11946	34.3405	1	-0.24
449	-0.100422	0.137064	20.23	1.2393	0	0	-0.23
451	-0.319831	0.00106614	72.42	22.1051	53.1277	1	-0.23
452	0.0518141	0.219612	75.27	10.5011	0	1	-0.22
453	0.473937	0.18077	32.26	27.3981	52.7473	1	-0.22
454	-0.086651	0.686934	85.61	18.512	0	1	-0.22
456	-0.252284	0.668266	94.83	38.5846	37.4146	0	-0.22
459	-0.0668782	0.0263954	81.65	15.3315	134.102	1	-0.22
460	0.0120481	0.30946	45.59	22.4878	0	1	-0.21
462	0.0205876	0.0157473	36.42	8.0243	35.3102	1	-0.2
463	-0.576567	0.674248	59.39	27.7549	195.546	1	-0.2
465	0.361127	0.000779291	43.95	20.6904	60.3601	1	-0.2
466	0.0895405	0.0878133	72.19	9.62344	0	1	-0.19
468	-0.614808	0.11185	90.65	15.2397	0	1	-0.18
469	-0.287115	0.881811	94.83	36.2768	37.4146	0	-0.18
470	0.0156505	0.0268628	0	0.954154	0	0	-0.17
471	-0.427542	0.221827	60.85	24.9212	71.2676	1	-0.17
472	-0.17548	0.985934	64.63	20.0662	0	1	-0.17
473	0.26163	0.263603	36.47	4.53577	0	1	-0.17
474	0.271288	0.00237156	63.64	13.3093	55.5461	1	-0.17
475	-0.768941	0.582433	65.78	21.0004	0	1	-0.16
476	0.582683	0.0959396	61.42	15.42	114.448	1	-0.16
477	-0.0111479	0.0117184	41.62	13.0907	21.0263	1	-0.16
478	0.0128704	0	0	0	0	0	-0.16
479	-0.602246	0.0132035	87.66	23.2316	0	1	-0.15
480	-0.00161607	0.261767	67.43	23.0252	0	1	-0.15
481	-1.35817	0.171652	70.67	10.2618	0	0	-0.15
482	0.297082	0.416172	17.07	5.41772	27.8048	0	-0.14
483	0.786297	0.279489	40.19	12.7505	0	1	-0.14
485	-0.100999	0.699317	64.43	18.9599	38.8016	1	-0.14
486	-0.00231882	0.00552943	0	2.5691	0	0	-0.14
487	0.119452	0.0331073	54.71	26.3314	73.1582	1	-0.14
490	-0.00529855	0.108233	40.46	11.9542	0	0	-0.12
491	-0.660326	0.3021	86.53	19.2281	81.4942	1	-0.12
492	0.0507741	0.197037	66.48	17.5388	0	1	-0.1
493	-0.067008	0.0378734	34.14	33.7017	32.3655	0	-0.1
494	-0.13987	0.699665	64.43	17.435	36.8304	1	-0.1
497	-0.482188	0.000590214	60.44	14.3168	61.8563	0	-0.1
498	-0.114661	0.0138403	26.93	12.2806	38.7532	1	-0.1
499	0.285792	0.358322	25.78	7.00408	0	0	-0.1
500	0.170498	0.0417468	0	3.88164	0	0	-0.1
501	-0.644948	0.00205503	65.64	33.2872	186.819	1	-0.1
502	-0.187385	0	50.41	17.7494	39.3074	1	-0.1
503	-0.149007	0.896785	64.43	28.3352	71.7868	1	-0.09
505	-0.150258	0.896781	64.43	27.939	72.7767	1	-0.09
506	0.514383	0.00300509	47.86	20.2444	39.0804	1	-0.07
507	-0.00672668	0.28433	58.2	11.3919	0	1	-0.07
509	0.275754	0.491552	40.16	24.0213	0	1	-0.07
511	-0.00808382	0.12509	66.48	19.8509	0	1	-0.06
513	0.261808	0.396275	49.77	19.9911	52.1951	1	-0.06
514	-0.161588	0.37175	52.32	6.57378	0	1	-0.05
515	-0.104107	0.38676	26.93	9.60861	38.7532	1	-0.05
516	-0.103305	0.353458	26.93	9.41856	39.5365	1	-0.05
519	0.320942	0.304568	34.03	14.7713	0	1	-0.05
520	0.111537	0.033571	68.18	30.871	98.1625	1	-0.05
521	-0.382921	0.000444027	74.31	39.4526	150.995	1	-0.05
523	-0.0926777	0.0536389	85.24	12.462	33.9565	1	-0.05
525	-0.00275331	0.0050546	77.29	5.90627	26.9857	1	-0.04
526	0.000464473	0	0	0	0	0	-0.04
527	-0.102652	0.0516515	38.69	4.17176	15.581	0	-0.04
528	0.626718	0.11503	43.6	6.82433	14.1373	1	-0.03
529	-0.296963	0.999901	50.41	18.4509	38.581	1	-0.03
531	0.280414	0.289987	20.23	3.42344	0	0	-0.02
532	0.0520746	0.0115662	0	2.23864	0	0	-0.02
533	0.0526029	0.0213859	54.46	18.4309	0	1	-0.02
534	0.135401	0.181187	32.7	15.2847	0	1	-0.02
535	-0.206728	0.00801987	47.1	55.5473	0	1	-0.01
536	-0.342682	0.148713	72.83	43.6001	0	0	-0.01
538	-0.462488	0.755698	43.86	37.0893	103.199	1	-0.01
539	-0.945285	0.0926435	73.49	22.743	62.8277	1	-0.01
540	-0.0797507	0.465205	83.87	7.05031	38.15	1	-0.01
541	-0.0900652	0.492183	93.1	8.89522	46.4111	1	-0.01
542	0.00570605	0.0431973	57.68	19.2608	0	1	-0.01
543	0.710091	0.00716749	43.07	15.4919	35.2808	1	0
546	-0.216231	0.101604	37.3	30.1794	28.7283	0	0
547	0.246408	0.228624	29.46	28.3578	0	0	0
548	0.301062	0.275222	26.3	3.27049	0	0	0
549	0.137124	0.803657	23.47	20.7095	0	1	0
550	0.137124	0.803657	23.47	20.7095	0	1	0
551	-0.158306	0.170319	55.4	16.2338	0	1	0
552	-0.113862	0.194789	30.17	12.7379	45.9532	1	0
554	-0.249577	0.569277	43.09	11.0121	0	1	0
557	-0.130721	0.709655	20.23	0.544331	0	0	0.02
559	-0.00677231	0	0	0	0	0	0.03
560	-0.142014	0.543014	53.47	0.393743	0	0	0.03
561	-0.126637	0.532474	52.04	0.8	0	0	0.03
562	0.170192	0.93271	20.23	4.94045	0	0	0.04
563	0.169424	0.933695	20.23	4.94418	0	0	0.04
564	-0.109003	0.0195479	63.32	10.4693	0	1	0.04
566	0.119099	0.163011	58.2	15.6916	0	1	0.04
567	0.0141051	0.955394	20.08	9.76768	0	1	0.05
568	0.0141051	0.955394	20.08	9.76768	0	1	0.05
569	0.42554	0.00584926	55.56	12.8514	0	1	0.05
571	-0.0341492	0.182026	65.01	8.26446	22.7278	1	0.06
572	-0.0355042	0.12508	65.01	8.22003	22.7278	1	0.06
574	-0.360522	0.0263663	52.65	30.1719	92.49	1	0.07
575	-0.320619	0.065343	103.17	42.1563	0	1	0.08
576	0.336582	0.999993	44.81	18.1241	66.943	1	0.08
577	-1.51816	0.606186	102.29	32.5446	0	0	0.08
578	-0.644848	0.0158322	119.68	30.6472	0	1	0.08
579	0.355155	0.0409031	0	4.99674	0	0	0.08
580	0.0603929	0.25834	75.27	12.0006	0	1	0.09
582	0.587191	0.000404835	55.56	18.7586	0	1	0.09
583	0.474644	0.408516	48.91	26.2592	0	1	0.09
584	0.30259	0.0774365	78.49	14.7668	0	1	0.1
585	-0.415495	0.156572	72.68	6.93956	22.7278	1	0.1
586	0.329294	0.999993	44.81	18.1241	66.943	1	0.1
587	-0.724375	0.525845	77.76	4.79317	0	0	0.1
588	0.662488	0.845333	3.24	19.108	0	1	0.1
589	-0.0597489	0.518469	42.35	24.0464	0	1	0.1
590	0.220881	0.42681	9.23	4.36763	0	0	0.1
592	-0.724705	0.295828	46.53	11.0968	0	0	0.1
594	-0.125269	0.00645684	20.23	4.22848	0	0	0.11
597	0.0806554	0.108999	37.91	17.9198	22.5441	1	0.11
599	0.429096	0.0121014	36.42	9.17442	35.3102	1	0.11
600	0.237117	0.516465	9.23	6.40145	0	0	0.11
601	0.691989	0.271726	43.84	9.82479	26.0134	1	0.11
603	0.276911	0.114695	18.46	6.40879	0	0	0.12
604	0.214795	0.662153	9.23	2.81812	0	0	0.13
606	0.0452092	0.0541891	45.48	23.6322	0	1	0.13
609	0.289343	0.560733	0	5.74375	0	0	0.16
610	-0.0255089	0.0158186	36.42	9.16658	37.0637	1	0.16
612	0.647028	0.66212	9.23	6.62841	0	0	0.17
613	0.291259	0.289167	0	6.28247	0	0	0.17
616	-0.244359	0.0820636	75.71	22.1916	59.6002	1	0.18
617	0.0553744	0.294312	75.27	13.6173	0	1	0.19
618	0.0714388	0.315788	42.31	26.6951	0	1	0.2
619	0.0661106	0.466165	75.27	16.1677	0	1	0.2
620	0.0661106	0.466165	75.27	16.1677	0	1	0.2
622	0.819884	0.742847	29.26	13.6557	0	1	0.2
623	0.314069	0.67983	41.93	18.6529	19.7813	1	0.2
624	1.12568	0.00952154	50.7	15.8771	0	1	0.2
625	0.216566	0.675826	9.23	7.14209	0	0	0.2
627	0.637411	0.663221	9.23	6.6985	0	0	0.22
628	0.810375	0.242248	12.03	23.4849	43.1225	1	0.22
629	0.532762	0.871088	12.47	22.3065	0	1	0.22
630	-0.339924	0.011811	50.53	22.2583	65.06	1	0.22
631	0.166081	0.603403	62.3	20.3229	48.8418	1	0.23
633	0.0317119	0.000723926	54.69	27.1907	172.683	1	0.23
634	0.239316	0.368873	0	8.22088	0	0	0.23
636	0.540125	0.00527719	76.89	28.1434	88.5941	1	0.24
638	0.0633081	0.0730828	52.65	26.3113	88.4066	1	0.26
639	0.0806156	0.167749	32.7	16.8435	0	1	0.26
640	0.341563	0.0801632	0	5.65911	0	0	0.27
642	0.503481	0.768756	52.32	6.32435	0	1	0.27
644	0.235001	0.396746	26.3	5.67103	0	0	0.28
645	0.835307	0.468501	23.96	21.736	32.9189	1	0.28
647	0.72867	0.419068	30.71	10.5231	46.0222	1	0.28
648	-0.0785629	0.0124093	78.01	34.788	0	1	0.3
650	0.345688	0.719385	19.03	25.6459	30.3859	1	0.3
651	0.345688	0.719385	19.03	25.6459	30.3859	1	0.3
652	0.0455772	0.442363	41.99	23.2936	0	1	0.3
653	0.629786	0.196391	50.28	16.7052	0	1	0.3
654	-0.0224977	0.0456892	59.39	34.0568	220.388	1	0.3
657	0.497985	0.091973	48.14	9.2791	30.8198	1	0.3
658	-0.0332772	0	0	0.333333	0	0	0.3
660	0.269301	0.907265	41.93	20.744	20.8096	1	0.32
661	0.269301	0.907265	41.93	20.744	20.8096	1	0.32
662	0.776786	0.718581	46.18	29.2173	67.1383	1	0.32
663	0.395227	0.605008	24.92	6.57267	25.5532	1	0.32
664	0.608062	0.850349	38.77	23.2261	19.302	1	0.32
665	0.375701	0.0886787	38.88	24.7413	138.833	1	0.32
666	0.363596	0.352767	32.26	6.48871	0	1	0.32
667	0.395227	0.605008	24.92	6.57267	25.5532	1	0.32
668	0.0504269	0.0915265	36.42	12.1569	35.3102	1	0.33
669	0.335295	0.0793508	0	5.6501	0	0	0.33
670	0.194735	0.270882	32.34	14.7598	0	1	0.34
671	0.582229	0.741094	0	7.83118	0	0	0.35
672	0.63572	0.738986	0	9.26757	0	0	0.35
673	-0.0778326	0.282918	75.27	16.9158	0	1	0.36
675	0.374978	0.0415336	9.23	5.23739	0	0	0.36
676	0.379478	0.0214555	46.18	23.7497	74.4941	1	0.36
678	0.167891	0.01224	46.84	23.4429	118.611	1	0.36
679	0.242456	0.00137869	48.99	27.0416	74.7382	1	0.36
680	-0.465857	0.00307945	103.17	36.9612	0	1	0.37
681	0.660708	0.368194	24.5	30.267	0	1	0.37
682	0.319581	0.0313997	0	4.77935	0	0	0.37
685	-0.612728	0.298187	55.43	25.5	60.5423	1	0.38
687	0.663814	0.890691	42.52	22.3507	51.7342	1	0.39
689	0.885309	0.467328	21.26	16.4823	0	1	0.39
690	0.759883	0.673374	29.85	18.2582	44.0041	1	0.39
691	0.192502	0.0209428	0	4.45078	0	0	0.4
692	0.260284	0.597484	0	4.20909	0	0	0.4
694	0.21831	0.633295	37.3	29.4245	30.2555	0	0.4
695	0.216945	0.875127	37.3	32.9689	31.9035	0	0.4
696	0.216945	0.875127	37.3	32.9689	31.9035	0	0.4
697	0.222473	0.305092	26.3	6.98396	0	0	0.4
698	0.884922	0.74675	42.52	28.7913	0	1	0.41
700	0.0366052	0.0384564	36.42	12.5945	39.488	1	0.41
701	0.501739	0.734929	52.32	9.02639	0	1	0.42
702	0.465507	0.0271404	43.71	16.7683	0	1	0.42
703	0.250337	0.531409	0	7.44644	0	0	0.43
704	0.315337	0.73504	54.26	22.7817	33.5259	1	0.43
705	0.500572	0.0896405	21.06	20.1318	46.3081	1	0.43
706	0.781977	0.171148	41.99	10.0763	0	1	0.44
707	0.562798	0.197422	37.39	19.9478	74.4647	1	0.44
709	0.260731	0.429271	0	2.74149	0	0	0.45
710	0.69465	0.555079	29.54	25.0563	0	1	0.46
712	0.605541	0.406578	24.5	41.0376	0	1	0.46
713	-0.0109057	0.00533749	36.42	11.2078	39.488	1	0.47
715	0.697555	0.58029	46.18	24.3871	60.5161	1	0.48
717	0.00259511	0.0275243	26.79	34.4464	0	1	0.48
718	-0.0868056	0.343389	54.34	21.7324	51.7668	1	0.48
719	0.709678	0.308515	28.68	5.81485	14.015	1	0.48
720	0.369319	0.327665	77.82	11.2365	0	1	0.49
721	-0.0760362	0.0192738	59.32	22.8421	60.5161	1	0.49
722	0.803078	0.257505	19.37	15.6093	0	1	0.5
724	0.50456	0.902986	41.46	11.8537	0	1	0.5
726	0.670758	0.0577711	41.49	18.4016	0	1	0.52
728	0.534261	0.14472	35.5	16.9288	0	1	0.53
729	0.422887	0.779582	52.32	7.6424	0	1	0.55
730	0.663942	0.740383	29.26	15.0452	0	1	0.55
731	0.162938	0.454516	26.3	7.40588	0	0	0.55
732	0.26406	0.26358	41.93	24.7463	19.302	1	0.55
735	0.602656	0.120648	12.03	5.59792	0	1	0.56
737	0.686642	0.62711	71.64	23.3729	135.385	1	0.57
738	0.29049	0.410537	54.26	36.4126	0	1	0.57
739	0.702343	0.00845762	43.07	23.6091	37.314	1	0.57
742	0.833204	0.023623	57.28	18.5963	35.5203	1	0.58
743	0.544404	0.996776	61.69	12.9003	0	1	0.6
744	0.859756	0.398461	16.96	14.0309	0	1	0.6
746	-0.119715	0.209613	36.42	13.0475	0	1	0.6
747	0.512606	0.299244	43.7	30.199	0	1	0.6
749	0.132087	0.014801	55.84	20.1773	51.7597	1	0.6
750	1.05943	0.0600869	41.3	16.6616	0	1	0.6
751	-0.0637744	0.0224808	0	0.886358	0	0	0.6
752	0.5251	0.293376	41.05	6.70124	0	0	0.6
754	0.544588	0.276436	61.69	9.96261	0	1	0.61
755	-0.609613	0.263733	47.56	17.4825	108.808	1	0.61
757	0.579665	0.310984	32.7	21.0005	0	1	0.62
758	0.844892	0.989549	42.52	24.0523	0	1	0.63
760	0.842949	0.283107	24.06	18.9816	0	1	0.64
761	0.831249	0.37501	25.36	15.6535	0	1	0.64
763	0.656039	0.399839	23.78	17.3777	50.351	1	0.64
764	0.673763	0.84152	77.82	13.3285	0	1	0.65
765	0.775237	0.829633	0	10.8262	0	0	0.67
766	0.762246	0.673975	0	7.95768	0	0	0.69
767	0.541323	0.182053	37.39	19.4669	0	1	0.69
768	0.528828	0.314616	12.03	5.57703	0	0	0.7
769	0.468336	0.00346392	31.64	26.3612	0	1	0.7
771	0.904665	0.807203	0	6.67662	0	0	0.74
772	0.117097	0.0252593	40.16	35.5115	88.7905	1	0.74
773	0.549768	0.00564531	30.18	17.8961	37.314	1	0.74
774	0.812675	0.723889	16.96	23.5695	0	1	0.75
775	0.534907	0.581207	39.08	17.0096	44.0041	1	0.77
776	0.701919	0.893574	35.16	19.8672	31.6995	1	0.78
778	-0.170549	0.00427369	56.59	29.521	187.362	1	0.78
779	0.782681	0.998713	56.84	19.2702	0	1	0.79
780	0.782681	0.998713	56.84	19.2702	0	1	0.79
782	0.801849	0.737776	16.96	23.5893	0	1	0.8
783	0.922036	0.329982	32.51	18.3866	0	1	0.8
785	0.600657	0.847262	77.82	11.6676	0	1	0.81
788	0.488803	0.0326422	32.7	20.3225	0	1	0.82
789	0.460492	0.458452	28.48	29.3278	0	1	0.83
791	0.561392	0.62838	62.41	22.9102	128.72	1	0.83
792	0.617921	0.558161	29.54	16.0025	0	1	0.85
794	0.605365	0.710169	46.18	31.9005	67.9828	1	0.85
795	0.872247	0.814717	0	8.03117	0	0	0.86
796	0.721757	0.786195	0	7.02592	0	0	0.86
797	0.63727	0.554939	33.29	17.8722	0	1	0.87
798	0.298445	0.00451026	32.78	14.8484	0	1	0.88
800	0.757503	0.695201	42.52	26.3543	0	1	0.88
801	0.496338	0.670828	29.85	18.9993	44.0041	1	0.89
802	0.741144	0.767288	0	7.07893	0	0	0.9
803	0.643659	0.50376	0	5.77625	0	0	0.9
804	0.805893	0.533622	0	5.23061	12.4667	0	0.9
805	-0.155576	0.0594839	67.59	17.7218	0	1	0.9
806	-0.0745429	0.0450976	46.94	41.6605	0	1	0.91
807	0.372585	0.491552	12.47	23.0094	0	1	0.92
808	0.372585	0.491552	12.47	23.0094	0	1	0.92
809	0.641925	0.63148	33.29	24.3891	0	1	0.92
810	0.721136	0.517355	26.02	6.09649	0	1	0.93
811	0.530191	0.539097	12.03	7.15317	0	1	0.96
812	0.856023	0.821007	0	9.44178	0	0	0.96
813	0.738298	0.650091	33.29	31.4201	0	1	0.96
814	0.794567	0.518123	0	6.6268	0	0	0.96
815	0.902219	0.611823	30.95	14.8295	0	1	0.97
816	0.626676	0.745784	33.29	27.3421	0	1	0.98
817	0.637191	0.678049	6.48	24.2493	0	1	0.98
818	0.837853	0.650715	6.48	20.104	0	1	0.99
820	0.906235	0.99485	0	5.69869	0	0	1
821	0.597177	0.504272	29.54	24.8788	0	1	1
822	0.269092	0.107154	0	6.37132	0	0	1
823	0.906229	0.994856	0	5.73059	0	0	1
825	0.833422	0.611647	12.47	15.8058	0	1	1
826	0.519958	0.999991	44.81	21.348	94.6204	1	1
827	0.222001	0.0142557	61.17	22.5686	0	1	1
828	0.676117	0.677928	6.48	20.0318	0	1	1.01
829	0.639006	0.495195	0	10.4135	0	0	1.02
832	0.860774	0.848578	12.03	15.4078	0	1	1.04
833	0.508042	0.180941	38.33	19.1499	47.5623	1	1.04
836	0.703302	0.456545	0	8.47401	0	0	1.07
837	0.861138	0.0257209	20.31	16.2644	56.5918	1	1.08
838	0.763609	0.050492	12.03	11.8782	0	1	1.08
841	0.849193	0.942349	12.03	12.5691	17.8282	1	1.11
843	0.60237	0.397879	36.26	17.997	0	1	1.13
844	0.429026	2.90008e-05	32.34	27.4498	0	1	1.14
845	0.505245	0.321347	50.72	16.6843	0	1	1.15
846	0.666123	0.037285	24.39	15.022	0	1	1.2
847	0.574881	0.71817	46.18	27.8723	70.2924	1	1.26
848	1.37588	0.0111342	40.54	24.0437	0	1	1.3
849	0.645157	0.723639	8.17	16.465	0	1	1.3
850	0.872832	0.189216	12.03	19.3064	0	1	1.3
851	0.820678	0.458756	16.96	16.2953	0	1	1.37
852	0.633753	0.795514	6.48	17.2213	0	1	1.38
854	1.23211	0.0108707	40.54	25.599	0	1	1.38
857	0.568407	0.0155217	29.1	15.0813	0	1	1.4
859	0.77582	0.497059	8.17	21.1725	0	1	1.44
860	0.812964	0.536779	11.41	27.5612	0	1	1.44
863	0.53138	0.0856055	28.16	13.2409	0	1	1.64
865	-1.11937	0.180234	69.06	35.5681	229.942	1	-0.28
866	0.0384589	0.955394	20.08	9.76768	0	1	0
868	-0.839988	0.0100553	137.5	14.155	63.6611	1	-1.54
869	-0.745238	0.152809	62.32	20.7385	26.9228	0	-1.42
871	-1.22662	0.976888	93.03	11.9244	68.6508	1	-1.3
873	-1.04884	0.967476	90.37	11.0626	38.6924	1	-1.2
875	-1.08082	0.83855	90.02	17.5433	144.593	1	-1.12
876	-0.211299	0.103972	57.53	4.08028	0	0	-1.1
878	-0.905036	0.999813	166.75	65.2643	0	1	-1.03
879	-0.891465	0.92097	171.17	102.602	228.03	1	-1.03
880	-1.77231	0.00157987	81	41.3498	0	1	-1
881	-0.980673	0.999813	166.75	65.2643	0	1	-0.95
882	-0.880708	0.731261	84.58	15.7469	0	1	-0.9
884	-0.292611	0.107535	78.82	26.929	138.451	1	-0.8
886	-0.597384	0.989925	133.08	15.2899	52.4019	1	-0.72
887	-0.601862	0.989925	133.08	15.2899	52.4019	1	-0.7
888	-0.13545	0.817345	63.95	36.1939	0	1	-0.7
890	-0.483122	0.0711326	63.6	6.56848	0	0	-0.5
892	-0.109739	0.0388757	65.2	21.267	51.376	1	-0.46
893	-0.664155	0.181224	52.57	18.7253	42.1136	1	-0.43
894	-0.297914	0.16168	65.2	15.8968	45.631	1	-0.4
895	-0.738709	0.409494	70.59	20.2373	0	1	-0.4
897	-0.379958	0.999966	41.03	10.961	0	0	-0.38
899	0.671864	0.270044	24.92	5.18776	0	1	-0.3
900	-0.0656763	0.110935	72.68	7.05131	22.5214	1	-0.3
901	0.0269077	0.00994692	0	1.60306	0	0	-0.3
902	0.300746	0.33515	52.93	21.4013	18.0993	1	-0.3
903	-0.230913	0.299707	46.17	7.89671	25.9667	0	-0.3
904	-0.0306696	0.986803	50.41	18.4509	38.581	1	-0.3
906	-0.241621	0.973769	58.2	11.288	29.0762	0	-0.26
907	-0.449407	0.0247213	37.3	9.21244	0	0	-0.2
908	0.278202	0.33515	52.93	21.4013	18.0993	1	-0.2
909	0.00983952	0.30946	45.59	22.4878	0	1	-0.2
910	-0.237569	0.379304	75.27	8.80072	0	0	-0.2
911	-0.243844	0.00185791	83.02	25.8544	142.924	1	-0.2
912	-0.332064	0.0299765	45.78	22.1863	60.6526	1	-0.2
913	-0.127163	0.130043	20.23	1.38743	0	0	-0.2
914	-0.475904	0.568381	63.32	11.8046	0	1	-0.19
915	-0.119554	0.260563	20.23	3.71084	0	0	-0.17
916	-0.131059	0.192437	20.23	2.35011	0	0	-0.16
917	-0.298058	0.527992	94.83	41.8078	40.5452	0	-0.15
920	0.476216	0.345212	70.93	20.6874	0	1	-0.15
921	-0.0211746	0.559289	69.11	1.22164	0	0	-0.14
922	0.0663246	9.62914e-05	0	1.91981	0	0	-0.13
923	0.0405399	0.205337	75.27	11.6498	0	1	-0.12
924	-0.0801415	0.92097	154.1	102.997	223.214	1	-0.1
926	0.113432	0.26737	58.2	17.1449	0	1	-0.1
927	-0.0998985	0.296464	26.93	8.4158	35.4532	1	-0.1
928	-0.135445	0.230184	20.23	2.59206	0	0	-0.1
929	0.0134962	0.00568247	17.07	2.8675	0	0	-0.1
930	0.402285	0.284505	57.28	14.2974	38.287	1	-0.1
931	-0.232077	0.0167077	48.02	10.194	0	1	-0.1
933	-0.84622	0.220718	115.54	26.3822	79.4804	1	-0.07
935	-0.182515	0.20437	63.4	9.65663	34.3952	1	-0.04
936	0.263724	0.0148313	65.64	33.4231	185.866	1	-0.04
938	-0.348623	0.567117	64.16	31.2834	66.8979	1	0
939	0.825104	0.620508	9.23	3.20424	0	0	0
940	0.565726	0.871088	12.47	22.3065	0	1	0.02
941	0.765631	0.017625	24.06	9.77586	0	1	0.03
942	-0.00677231	0	0	0	0	0	0.03
944	0.665839	0.845333	3.24	19.108	0	1	0.08
945	0.0652445	0.226358	66.48	15.6865	0	1	0.1
946	-0.0142322	0.023602	0	1.5	0	0	0.1
948	0.085622	0.564403	75.27	16.1256	0	1	0.1
949	-0.00862726	0.0585093	36.42	9.33259	35.3102	1	0.1
952	0.674279	0.890256	8.17	25.7069	0	1	0.2
954	0.291537	0.661689	0	3.90004	0	0	0.2
955	0.289109	0.67541	0	4.13539	0	0	0.2
956	0.210762	0.675826	9.23	7.14209	0	0	0.24
957	0.703311	0.345887	16.13	7.97387	28.8532	1	0.24
958	0.131741	0.0263453	0	3.83704	0	0	0.27
959	0.475583	0.40973	41.49	13.3955	0	1	0.28
960	0.104644	0.00551591	0	3.21967	0	0	0.3
961	0.34291	0.113383	0	6.44156	0	0	0.3
962	0.00793517	0.0135423	0	2.8087	0	0	0.3
963	-0.180738	0.0844151	40.62	14.5779	0	1	0.3
964	0.193008	0.0262566	0	4.5672	0	0	0.4
965	-0.084452	0.0385475	49.41	12.7705	0	1	0.4
966	0.0155044	0.0992284	35.94	23.7568	0	1	0.4
969	0.259917	0.571961	0	4.09029	0	0	0.4
971	0.763688	0.794966	3.24	18.8415	0	1	0.4
972	0.192558	0.589595	9.23	7.13025	0	0	0.42
973	0.598275	0.711689	61.69	15.0555	0	1	0.44
974	0.681875	0.567705	90.71	9.63535	0	1	0.48
976	-0.546954	0.100312	69.64	29.5426	89.7673	1	0.5
977	0.504899	0.903225	41.46	11.6899	0	1	0.5
979	0.254005	0.33515	41.93	23.0742	19.302	1	0.6
982	0.348667	0.315666	41.49	14.9493	0	1	0.64
983	0.488757	0.62399	3.24	22.4284	0	1	0.66
984	0.775909	0.366569	41.05	23.4102	0	1	0.68
985	-0.179607	0.134662	20.23	11.5455	0	0	0.7
986	0.703885	0.212036	32.7	19.1946	0	1	0.7
988	0.734415	0.369206	21.26	16.5009	0	1	0.72
989	0.127703	0.000161776	43.78	35.92	0	1	0.77
990	0.692172	0.892067	35.16	19.3277	31.6995	1	0.8
991	0.755592	0.761668	0	6.60412	0	0	0.8
994	0.894864	0.874866	6.48	17.5629	0	1	0.8
995	0.74197	0.822968	0	8.40873	0	0	0.86
997	0.388877	0.20936	38.77	27.0328	64.2837	1	0.89
998	0.565362	0.543441	20.31	22.2137	0	1	0.9
999	0.855537	0.87547	3.24	17.0807	0	1	0.9
1001	0.541204	0.539097	12.03	7.15317	0	1	0.9
1003	0.744433	0.74586	0	9.84231	0	0	0.98
1004	0.127344	0.834593	36.26	20.2875	50.8803	1	0.99
1005	0.519958	0.999991	44.81	21.348	94.6204	1	1
1006	1.00724	0.574629	8.17	17.806	0	1	1.06
1008	0.786571	0.846354	15.27	15.8649	0	1	1.2
1009	0.660255	0.742452	8.17	15.6697	0	1	1.23
1010	0.619274	0.638552	12.47	13.2838	0	1	1.3
1011	1.37736	0.66563	16.96	16.094	0	1	1.4
1012	1.26198	0.666504	12.03	17.5293	0	1	1.6
		Test set
Name	RA function(LK)	Abs MaxPos-MaxNeg	TPSA(NO)	Eta_C	D/Dtr05	B05[C-N]	logBB
9	-0.253693	0.00866505	285.14	39.9773	0	1	-1.54
10	-0.0929242	0.0017609	117.75	10.1719	47.1556	1	-1.54
17	-0.562126	0.140916	113.42	33.5542	77.9805	1	-1.3
18	-0.599479	0.0031419	127.39	15.3493	124.876	1	-1.3
22	-0.51023	0.2404	81.7	19.3877	0	1	-1.17
28	-0.546008	0.750563	101.22	16.3718	0	1	-1
30	-0.83834	0.853615	101.9	56.8293	0	1	-0.93
37	-0.0971908	0.66844	81.93	16.294	56.9209	1	-0.8
39	-0.458666	0.0220448	278.8	191.749	0	1	-0.78
43	-0.0450354	0.0936594	62.16	28.1448	0	1	-0.77
46	-0.611872	0.989925	133.08	15.2899	52.4019	1	-0.72
47	-0.451422	0	278.8	191.765	0	1	-0.7
51	-0.67588	0.965501	143.72	13.0208	93.3254	1	-0.67
62	-0.67752	0.0124958	84.22	11.3544	0	1	-0.58
64	-0.286212	0.970315	221.29	100.232	0	1	-0.55
65	-0.519068	0.999891	164.63	38.6812	0	1	-0.52
85	-0.301036	0.776773	86.34	16.532	71.7172	1	-0.28
87	-0.601543	0.868253	86.59	15.9931	136.422	1	-0.27
91	-0.244593	0.880897	94.83	38.5846	37.4146	0	-0.22
95	0.330388	0.0263113	38.05	5.64508	0	1	-0.2
101	0.110492	0.901932	61.42	15.42	114.448	1	-0.16
102	0.513414	0.150572	65.25	13.5245	45.3297	1	-0.14
103	0.659266	0.469617	24.5	20.599	0	1	-0.13
105	-0.875127	0.334078	54.34	20.2743	90.4659	1	-0.12
106	0.0421066	0.0679626	61.6	27.4014	0	1	-0.11
117	-0.360598	0.0927687	61.6	31.694	112.4	1	-0.03
120	-0.450243	0.170823	63.32	7.43137	0	0	0
123	-0.104701	0.284554	50.41	7.67868	0	1	0
126	0.734373	0.639169	50.72	15.706	0	1	0.02
136	0.336278	0.663313	36.42	9.17442	35.3102	1	0.11
145	0.175813	0.970315	221.29	102.182	0	1	0.19
146	0.0632549	0.311551	32.78	29.0485	92.8708	1	0.2
147	0.795619	0.521055	29.26	15.7538	0	1	0.2
154	0.644051	0.983951	23.96	21.736	32.9189	1	0.28
160	0.190001	0.00865544	65.25	17.3024	0	1	0.3
169	0.52449	0.497012	41.49	16.3713	22.6082	1	0.39
170	0.103056	0.552526	35.94	23.7568	0	1	0.39
172	0.545766	0.890628	16.13	7.97387	28.8532	1	0.4
173	0.819865	0.639964	27.03	7.77557	0	1	0.42
197	0.0939899	0.214762	29.1	18.002	0	1	0.74
198	0.750485	0.99946	12.47	29.6418	72.1364	1	0.74
199	0.0324748	0.0876773	55.12	12.2595	0	1	0.74
203	-0.0127526	0.0282864	44.81	26.6398	0	1	0.78
210	0.770366	0.979083	0	7.07893	0	0	0.9
218	0.69607	0.569792	12.47	18.3132	0	1	1.06
220	0.793095	0.989549	42.52	24.0523	0	1	1.11
223	0.254349	0.229715	44.37	31.3174	0	1	1.18
226	0.750044	0.817072	6.48	15.6597	0	1	1.38
232	-1.27717	0.977283	92.79	22.5496	0	1	-2
236	-1.97244	1	219.93	41.4953	115.13	1	-1.89
238	-0.700026	0.39417	133.75	59.3519	374.237	1	-1.82
254	0.330895	0.000124673	103.45	20.2706	69.3214	1	-1.4
256	-1.27142	0.000327705	111.79	44.6693	130.237	1	-1.36
257	-0.0630457	0.00210854	66.84	20.6414	52.0085	1	-1.35
264	-0.841748	0.0577252	49.33	13.2396	0	0	-1.3
265	-1.26289	0.976888	93.03	11.9244	68.6508	1	-1.3
267	-1.26552	0.998785	66.84	21.2972	53.0987	1	-1.26
268	-0.175659	0.192212	37.3	7.11568	0	0	-1.26
269	-1.21165	0.997057	86.26	18.0665	72.5097	1	-1.23
273	-1.14978	0.966134	86.59	15.6471	67.9439	1	-1.23
279	-0.578932	0.130285	71.85	39.3864	56.6163	1	-1.15
284	-0.734759	0.00715367	114.45	57.1734	161.056	1	-1.1
297	-0.419228	0.0553906	61.88	39.0954	269.243	1	-1
299	0.226497	8.66508e-05	46.5	13.9416	107.498	1	-1
309	-0.889772	0.99983	91.48	34.1895	103.725	1	-0.89
310	-0.0125484	0.0747996	36.42	9.25847	37.0637	1	-0.87
314	-0.265718	0.641917	206.07	45.9821	0	1	-0.83
317	-0.267213	0.0184858	63.91	26.667	51.7734	1	-0.8
319	-0.575243	0.479002	71.5	33.0166	69.9763	1	-0.8
321	-1.07097	0.204162	92.86	15.9465	63.1944	1	-0.8
324	-0.3201	0.0635146	120.24	39.4799	0	1	-0.79
329	-0.758601	0.0121642	118.03	56.0811	122.409	1	-0.74
333	-0.497973	0.0360067	87.89	22.9396	59.1543	1	-0.72
335	-0.79669	0.0927664	85.49	35.1717	107.528	1	-0.71
336	0.02148	0.00234844	57.36	4.13613	14.7655	0	-0.71
338	-0.340745	0.00372364	64.33	33.8823	0	1	-0.7
347	-0.850739	0.00501582	78.01	16.9012	63.3242	1	-0.67
349	-0.551274	0.535151	86.53	15.932	63.3242	1	-0.67
352	-0.875771	0.489305	80.93	22.8165	84.542	1	-0.66
356	-0.429926	0.999455	69.06	35.5681	229.942	1	-0.63
363	0.0437358	0.0424488	49.41	10.1548	20.6272	1	-0.6
369	-0.559812	0.998066	131.19	37.832	128.637	1	-0.56
378	0.0719357	0.132353	61.77	8.58719	0	1	-0.52
380	-0.55774	0.0401456	43.78	28.1686	102.068	1	-0.51
381	-0.109613	0.0666096	40.62	17.8914	63.2135	1	-0.5
383	-0.670997	0.0702437	66.56	16.4629	0	1	-0.5
388	-0.248173	0.266366	108.17	7.16753	24.9595	1	-0.47
389	0.370037	0.218931	80.47	24.4481	0	1	-0.47
391	-0.169831	0.0838718	53.09	28.9262	0	1	-0.46
395	-0.552305	0.791316	52.57	18.5282	47.8328	1	-0.43
397	-0.470524	0.767498	65.78	23.4366	0	1	-0.43
398	-0.536714	0.0708935	63.32	7.11365	22.9667	0	-0.43
399	0.0142723	0.532296	110.45	37.7257	0	1	-0.42
400	-0.205201	0.00343514	104.89	30.1068	33.8711	1	-0.42
401	-0.500745	0.295966	104.89	30.4952	35.2313	1	-0.42
402	-0.205945	0.0785657	70.67	30.962	70.3975	1	-0.42
407	-0.8471	0.672593	53.09	32.0027	0	1	-0.4
420	-0.5663	0.405276	69.26	18.082	50.3979	1	-0.31
423	0.0828041	0.404116	75.27	15.7714	0	1	-0.3
425	-0.223889	0.943161	40.46	24.9062	28.7057	0	-0.3
429	-0.117513	0.726348	64.43	16.2855	34.4672	1	-0.3
433	-0.0932569	0.00367818	81.42	22.0177	25.9525	1	-0.29
441	-1.01309	0.0287895	90.02	14.1057	128.743	1	-0.27
444	0.769314	0.843202	43.78	37.8477	0	1	-0.25
450	0.431273	0.578095	41.49	15.2732	0	1	-0.23
455	-0.271083	0.0650507	53.6	25.9869	77.7941	1	-0.22
457	0.231932	0.00266797	70.38	24.7711	49.2633	1	-0.22
458	-0.228855	0.995282	101.88	16.706	89.3858	1	-0.22
461	-0.633909	0.944567	37.3	12.4848	0	0	-0.2
464	-0.503357	0.17612	67.35	18.1901	0	1	-0.2
467	-0.228957	0.0118051	104.64	11.0638	0	1	-0.19
484	-0.20373	0.533053	75.27	10.3997	0	0	-0.14
488	-0.105886	0.646471	26.3	2.13662	0	0	-0.13
489	0.0121059	0.207824	28.48	31.8467	48.6836	1	-0.13
495	-0.607699	0.302244	56.33	15.1442	0	1	-0.1
496	-0.166497	0.297863	76.82	25.256	57.0802	1	-0.1
504	-0.12423	0.9993	64.43	28.3352	71.7868	1	-0.09
508	-0.0893435	0	154.1	102.997	223.214	1	-0.07
510	-0.00528184	0.00316362	0	1.07735	0	0	-0.06
512	0.0905136	0.603403	49.77	19.9911	52.1951	1	-0.06
517	0.155805	0.180214	34.03	14.4365	0	1	-0.05
518	0.195043	0.446386	34.03	14.7713	0	1	-0.05
522	0.22909	0.107688	54.69	27.5061	161.001	1	-0.05
524	-0.0350264	0.907189	77.29	5.99266	26.9857	1	-0.04
530	0.32853	0.198851	48.99	24.3406	0	1	-0.03
537	0.625436	0.0651631	17.07	4.00537	0	0	-0.01
544	0.00853296	0	0	0	0	0	0
545	0.263128	0.00127624	52.05	13.246	35.0544	1	0
553	0.0232643	0.154725	63.57	13.9358	0	1	0
555	-0.0090031	0.0172887	12.53	0.996285	0	0	0.01
556	-0.0547144	0.33166	75.27	18.6011	0	1	0.02
558	-0.113483	0.0472052	47.58	0.16	0	0	0.03
565	0.0236488	0.0148765	0	1.91981	0	0	0.04
570	-0.209757	0.017032	55.43	24.3001	56.7506	1	0.06
573	0.0861437	0.862218	20.23	5.53159	0	0	0.07
581	0.0539829	0.31225	75.27	15.2548	0	1	0.09
591	0.0968921	0.0772723	49.41	15.5384	0	1	0.1
593	0.326854	0.457536	37.39	23.7147	65.06	1	0.1
595	0.376478	0.486074	51.11	27.4002	81.0941	1	0.11
596	0.256278	0.421809	59	25.1749	20.2859	1	0.11
598	0.136574	0.178499	54.9	31.0188	0	1	0.11
602	0.253485	0.390231	26.3	4.42985	0	0	0.12
605	-0.502519	0.31246	54.46	18.4595	0	1	0.13
607	0.706457	0.0646482	58.36	14.9994	0	1	0.14
608	-0.457583	0.212523	68.18	28.0217	100.915	1	0.15
611	0.218985	0.814176	39.68	25.1083	87.5162	1	0.16
614	0.480673	0.11445	58.04	17.634	0	1	0.18
615	-0.275424	0.0260109	73.56	20.2173	59.5622	1	0.18
621	0.287071	0.411426	20.23	4.59003	0	0	0.2
626	0.00853296	0	0	0	0	0	0.2
632	0.191839	0.603403	62.3	20.3229	48.8418	1	0.23
635	-0.123353	0.212892	75.27	20.3111	0	1	0.24
637	-0.138979	0.0781467	32.34	17.3421	45.7911	1	0.25
641	-0.19152	0.030192	89.6	18.3113	0	1	0.27
643	0.285826	0.474587	0	7.00276	0	0	0.27
646	0.931078	0.171968	34.36	19.5978	81.4668	1	0.28
649	0.124659	0.762676	41.99	23.2936	0	1	0.3
655	-0.076191	0.165181	55.63	18.7553	63.3919	1	0.3
656	0.215406	0.577276	9.23	9.00248	0	0	0.3
659	0.44845	0.0677554	21.7	19.7747	66.4896	1	0.31
674	0.373989	0.0409868	114.1	21.5315	0	1	0.36
677	0.177626	0.0160348	39.08	17.8465	44.0041	1	0.36
683	0.364165	0.190621	65.28	15.2778	0	1	0.38
684	-0.00878316	0.0240826	36.42	9.27506	36.0911	1	0.38
686	0.700224	0.669107	50.72	21.0224	0	1	0.39
688	0.72672	0.93237	21.26	14.5557	21.2151	1	0.39
693	0.246109	0.414414	26.3	4.80511	0	0	0.4
699	-0.56017	0.0459826	100.59	29.1067	0	1	0.41
708	0.254485	0.305736	26.3	6.04835	0	0	0.45
711	0.0266142	0.823997	43.86	28.4179	91.7066	1	0.46
714	-0.0976322	0.109503	33.2	21.3759	0	1	0.48
716	0.577578	0.651926	24.5	37.7459	0	1	0.48
723	0.393751	0.00302596	28.6	15.2033	0	1	0.5
725	0.751704	0.798001	0	9.36685	0	0	0.52
727	0.776577	0.264218	39.72	19.2777	55.5008	1	0.52
733	0.208018	0.00596443	0	4.2305	0	0	0.56
734	0.0602172	0.212152	69.02	31.4004	0	1	0.56
736	0.75573	0.543655	3.24	9.9249	0	1	0.57
740	-0.0591731	0.00924731	70.95	28.1788	0	1	0.57
741	0.131186	0.0674274	36.42	15.9556	39.488	1	0.58
745	0.512273	0.922059	55.84	20.1773	51.7597	1	0.6
748	0.275212	0.323199	23.55	25.9722	0	1	0.6
753	0.69789	0.698895	0	12.4256	0	0	0.61
756	0.695947	0.706175	46.18	27.3543	64.5404	1	0.62
759	0.718782	0.0600855	45.15	25.5097	0	1	0.63
762	0.817023	0.755884	25.36	15.6535	0	1	0.64
770	0.0802947	2.67852e-06	48.83	24.0329	0	1	0.7
777	0.652253	0.808647	48.83	27.4714	72.0141	1	0.78
781	0.786577	0.998713	56.84	19.2702	0	1	0.79
784	-0.491322	0.1531	47.1	39.317	230.116	1	0.81
786	0.790131	0.86031	26.02	6.47372	0	1	0.81
787	0.759376	0.967065	32.7	20.3225	0	1	0.82
790	0.722422	0.0255305	20.31	17.0819	0	1	0.83
793	0.650161	0.0675674	23.47	25.9165	112.36	1	0.85
799	0.869878	0.999989	32.78	14.8484	0	1	0.88
819	0.744689	0.670905	6.48	15.9182	0	1	0.99
824	0.897173	0.986047	12.47	15.8058	0	1	1
830	0.747112	0.468741	12.47	16.3173	22.7902	1	1.03
831	0.756528	0.902511	32.7	20.0767	0	1	1.03
834	0.784528	0.780997	0	11.3224	0	0	1.05
835	0.864785	0.761733	3.24	15.4078	0	1	1.06
839	0.9352	0.956832	12.03	11.8782	0	1	1.08
840	0.461378	0.035829	42.32	30.4049	81.0054	1	1.1
842	0.661531	0.836683	36.26	17.997	0	1	1.13
853	0.740264	0.893973	6.48	17.4378	0	1	1.38
855	1.37645	0.0376781	40.54	23.8003	0	1	1.38
856	1.02759	0.798832	11.41	27.1346	0	1	1.4
858	1.02164	0.657547	8.17	28.8692	0	1	1.44
861	0.857133	0.390158	31.64	30.0474	0	1	1.5
862	1.43558	0.995454	12.03	17.5293	0	1	1.6
864	-1.99616	0.999784	160.83	50.6899	134.71	0	-1.5
867	-1.13742	0.931728	121.38	10.5186	0	0	-1.6
870	-1.3637	0.0126382	88.89	13.1614	56.9188	1	-1.4
872	-1.21733	0.993098	203.06	103.204	265.177	0	-1.2
874	-1.08984	0.967476	90.37	11.0626	38.6924	1	-1.2
877	-0.48944	0.0834874	74.57	19.2315	0	1	-1.1
883	-0.642015	0.965782	84.32	13.9207	44.9924	1	-0.85
885	-1.11256	0.000793412	119.05	9.72846	31.3195	1	-0.8
889	-0.62098	0.88028	84.39	32.75	69.9763	1	-0.7
891	-0.395682	0.0141082	37.61	18.1126	46.9571	1	-0.48
896	-0.41789	0.467731	31.23	27.5917	0	1	-0.4
898	-0.342267	0.0380773	49.33	5.05927	0	0	-0.3
905	0.0979379	0.200839	42.43	26.0956	0	1	-0.3
918	-0.190299	0.0130069	104.64	13.984	0	1	-0.15
919	-0.0524786	0.748478	17.07	1.82033	0	0	-0.15
925	0.0349746	0.0553981	58.2	11.1517	48.5397	1	-0.1
932	-0.237452	0.572764	61.82	8.39796	24.7694	1	-0.1
934	-0.15292	0.5124	72.83	40.053	0	0	-0.07
937	-0.822101	0.0183728	80.05	26.4245	156.977	1	-0.01
943	0.0961969	0.409051	75.27	15.8446	0	1	0.04
947	0.282706	0.364939	9.23	1.63683	0	0	0.1
950	0.0570946	0.0708709	59.14	13.3946	32.9454	1	0.2
951	-0.127067	0.0451115	32.34	17.5977	40.0719	1	0.2
953	0.553878	0.455295	9.23	6.25593	0	0	0.2
967	0.298838	0.577255	0	1.66667	0	0	0.4
968	0.29672	0.627184	0	2.7859	0	0	0.4
970	0.144676	0.00313817	30.18	17.0131	37.314	1	0.4
975	0.421996	0.162055	32.67	13.4275	0	1	0.5
978	0.116343	0.518469	23.47	24.633	0	1	0.54
980	0.275579	0.435296	23.55	22.5617	0	1	0.6
981	0.31968	0.33515	41.93	23.0742	19.302	1	0.6
987	0.57285	0.456015	43.07	17.7599	37.314	1	0.7
992	0.941102	0.114956	0	4.09272	0	0	0.8
993	0.810154	0.508534	0	5.31294	0	0	0.8
996	0.477192	0.0160928	38.33	13.8655	0	1	0.88
1000	0.881092	0.727077	0	5	0	0	0.9
1002	0.508022	0.491552	12.47	23.0094	0	1	0.92
1007	0.7636	0.411697	29.26	14.612	0	1	1.1

## Sheet: Sheet4_Ablation study-1
	Initial pool of 2D descriptors
NAME	D/Dtr05	Eta_C	nRCOOH	nC(=N)N2	mindO	TPSA(NO)	MLOGP2	nR05	Eta_R	C-008	S-107	B07[C-N]	B10[C-O]	TPSA(Tot)	nDB	DELS	C-034	B02[N-O]	B02[O-O]	F09[N-Br]	SAacc	nHet	nBnz	MAXDP	X4sol	Eta_D_beta	nArOCON	nN(CO)2	nOHt	C-041	SaaO	minsOH	B05[C-N]	B09[C-O]	B09[N-Br]	B10[C-F]	ESOL	nO	Eta_C_A	F01[C-O]	F02[N-N]	F05[O-O]	F06[C-O]	nN	O%	MeanDD	nArCONR2	nArOH	nHAcc
1	113.138	34.5359	2	0	11.8548	206.3	1.76264	1	77.7542	0	1	1	1	231.6	5	78.0022	0	1	1	0	321.509	16	1	6.19052	12.4906	-5.75	0	0	0	0	0	9.44866	1	1	0	0	-2.36641	9	0.959332	11	3	6	20	6	16.0714	10.2571	0	1	14
2	36.1655	39.805	1	0	11.4453	149.15	0.0143153	1	69.5628	7	0	0	1	149.15	2	65.2777	0	0	1	0	274.686	10	1	4.81388	12.7951	-13.25	0	0	0	0	0	9.31576	1	1	0	0	-2.20829	9	1.20621	12	0	6	20	1	15	16.6667	0	0	10
3	36.843	40.0824	1	0	11.479	149.15	0.0143153	1	69.8308	7	0	1	1	149.15	2	65.5474	0	0	1	0	274.686	10	1	4.58101	12.7544	-13.25	0	0	0	0	0	9.34458	1	1	0	0	-2.32595	9	1.21462	12	0	6	21	1	15	16.3712	0	1	10
4	0	28.5098	0	0	12.3912	78.94	7.43325	0	48.0634	0	0	1	1	78.94	1	22.7579	0	1	0	1	112.748	7	0	5.39121	7.88741	-4.25	0	0	0	0	0	0	1	1	1	0	-4.09618	1	1.01821	1	3	0	2	5	1.78571	9.80423	0	0	6
5	96.7633	21.6479	0	0	12.6991	117.51	5.73742	2	49.4026	0	0	1	1	117.51	1	38.9952	1	1	1	0	176.538	10	1	5.69909	9.07967	-3.25	0	0	0	0	4.89967	9.5869	1	1	0	0	-3.40116	4	0.832613	4	2	0	4	5	10	12.56	1	0	8
6	102.995	23.4755	0	0	12.7432	117.51	4.95891	2	51.9387	0	0	1	1	117.51	1	40.4411	1	1	0	0	176.538	10	1	5.74323	9.29155	-3.75	0	0	1	0	5.08092	9.2615	1	1	0	0	-3.36934	4	0.869463	4	2	0	4	5	9.30233	12.6154	1	0	8
7	67.2453	26.7929	0	0	0	189.53	15.1936	1	43.4911	7	0	0	0	189.53	0	67.2262	0	0	1	0	374.466	11	0	3.99783	6.74131	-15.5	0	0	0	0	0	9.07666	0	1	0	0	1.53902	11	1.16491	14	0	9	15	0	24.4444	6.92095	0	0	11
8	0	28.3259	0	0	11.355	128.33	1.5111	0	61.9393	0	0	1	1	136.71	5	42.4762	0	1	1	0	184.233	10	2	5.22611	9.10837	-1	0	0	0	0	0	10.229	1	1	0	0	-3.19179	4	0.858361	2	0	0	5	5	6.45161	10.5265	0	1	9
11	72.7611	26.1266	0	0	11.4511	110.43	1.29079	1	58.3683	0	0	1	1	118.81	3	36.3742	2	1	1	0	126.908	10	1	6.03238	9.97327	-1	0	0	0	0	0	0	1	1	0	0	-3.53926	3	0.842795	1	1	0	7	6	5.26316	11.0301	1	0	8
12	82.18	97.4078	0	0	12.3639	220.15	0.535734	1	173.433	4	0	1	1	220.15	7	118.814	0	1	1	0	373.651	16	2	7.44896	18.0132	-15.5	0	0	0	0	0	11.32	1	1	0	0	-6.6984	12	1.62346	16	0	5	34	4	10	25.8548	0	3	16
13	0	244.363	0	0	14.2105	555.44	37.961	0	502.639	16	0	1	1	555.44	8	328.702	0	1	1	0	955.58	39	7	9.83236	40.1326	-25.25	0	0	0	0	0	10.3173	1	1	0	0	-9.49402	27	1.92412	34	0	19	101	10	11.7904	52.0197	0	4	37
14	56.9188	13.6037	0	1	0	84.93	0.673835	1	23.7825	1	1	1	0	110.23	3	12.4846	0	0	0	0	117.437	7	0	2.42641	4.20649	-3.75	0	0	0	1	0	0	1	0	0	0	-1.28792	0	0.800219	0	5	0	0	6	0	5.97794	0	0	6
15	81.5712	36.3963	0	0	12.9405	112.9	6.43578	1	71.0238	0	0	1	1	121.28	4	49.6659	1	1	1	0	136.56	11	1	6.41591	11.979	-5.75	0	0	0	0	0	0	1	1	0	0	-3.98441	4	1.07048	3	2	0	7	6	6.06061	10.7968	0	0	9
16	0	10.3578	1	0	10.7306	70.16	4.9221	0	24.7736	0	0	0	0	70.16	3	29.1742	0	0	1	0	110.984	6	1	4.62525	5.86726	0.75	0	0	0	0	0	8.77122	0	0	0	0	-3.30501	3	0.647361	3	0	2	4	1	14.2857	8.05833	0	0	4
19	68.6508	11.9244	0	0	11.4752	93.03	0.541312	2	24.591	1	0	1	0	93.03	2	23.4896	0	1	0	0	130.41	7	0	4.47522	5.6134	-5.25	0	0	0	0	0	9.0182	1	0	0	0	-1.35777	3	0.701436	4	3	0	3	4	10.3448	8.48529	0	0	6
20	67.9439	15.8137	0	0	10.3386	86.26	0.428516	1	30.8642	0	1	1	1	111.56	3	19.0765	1	0	1	0	99.4001	8	0	3.33857	4.93932	-4.5	0	0	0	0	5.64745	0	1	1	0	0	-1.92969	3	0.790685	2	1	0	3	4	7.5	6.43684	0	0	6
21	72.5097	17.342	0	0	10.3859	86.59	1.77536	1	32.7157	0	1	1	1	111.89	3	20.6683	1	0	1	0	98.1749	8	0	3.38592	5.13232	-4.5	0	0	0	0	5.68378	0	1	1	0	0	-2.29118	3	0.82581	2	1	0	2	4	6.97674	6.77619	0	0	6
23	83.1704	20.8677	1	0	10.7628	53.43	8.6728	1	44.8368	0	0	1	1	53.43	3	18.9051	0	0	1	0	87.7381	4	1	3.76282	6.85017	0.75	0	0	0	0	0	8.83129	1	1	0	0	-4.39218	2	0.802602	2	0	0	4	2	4	8.13846	0	0	4
24	144.593	18.1556	0	0	10.7608	86.59	1.53173	2	34.4059	0	1	1	1	111.89	4	22.7755	2	0	1	0	98.1749	8	0	3.76075	6.14751	-4.5	0	0	0	0	5.71813	0	1	1	0	0	-2.44788	3	0.825255	2	1	0	2	4	7.14286	7.99567	0	0	6
25	102.798	17.0742	0	0	11.0749	57.36	1.18885	2	32.8482	1	0	1	1	57.36	1	15.1305	1	1	1	0	57.2799	5	1	4.07486	6.06739	-4.5	0	0	0	1	0	0	1	1	0	0	-2.5983	2	0.813057	3	0	0	4	3	4.7619	8.9619	0	0	4
26	109.486	121.961	0	0	14.3661	170.06	3.34568	1	171.744	12	0	0	1	170.06	5	106.924	0	0	1	0	263.194	14	0	7.3661	20.3356	-33.5	0	0	1	0	0	10.5117	0	1	0	0	-7.32155	14	1.96711	24	0	6	35	0	10.2941	22.2443	0	0	14
27	82.0971	24.6292	0	0	13.0141	74.87	2.45927	2	55.2668	2	0	1	1	74.87	2	34.4585	2	1	1	0	78.5383	7	2	6.08917	11.268	-2.5	0	0	0	0	0	0	1	1	0	0	-3.85751	4	0.849284	6	0	1	12	3	8.33333	16.5172	0	0	6
29	82.4786	25.7654	0	0	12.2347	92.95	2.47805	1	55.9371	0	0	1	1	92.95	2	32.1326	2	1	0	0	150.522	7	2	5.23467	8.38448	-1.5	0	0	0	0	0	8.92999	1	1	0	0	-3.25775	5	0.831142	7	0	0	10	2	8.47458	10.8452	0	0	6
31	0	34.3088	0	0	12.2764	76.07	15.8853	0	76.3507	0	0	1	1	84.45	2	40.781	0	0	1	0	112.12	7	4	5.27644	11.8384	3	0	0	0	0	0	9.99731	1	1	0	0	-6.52707	5	0.902864	5	0	1	7	1	7.04225	13.6814	0	1	6
32	103.725	34.1895	0	0	13.2982	91.48	8.10042	1	63.0198	1	0	1	1	91.48	1	54.9698	0	1	0	0	168.566	8	1	6.29822	9.11252	-6.5	0	0	1	0	0	11.5107	1	1	0	0	-4.12709	2	1.06842	2	1	0	3	4	3.22581	9.14718	0	0	8
33	0	25.3394	0	0	12.7236	60.85	2.01492	0	38.547	1	0	1	1	69.23	4	31.5866	0	1	1	0	91.6392	6	0	5.72363	7.4632	-8.5	0	0	0	0	0	9.57135	1	1	0	0	-2.94524	3	1.10171	1	0	2	2	2	5.88235	8.21344	0	0	5
34	0	17.9313	0	0	11.7907	93.45	8.07071	0	47.8526	0	0	1	1	93.45	2	28.1137	0	1	1	0	130.208	6	3	5.3072	7.11975	4.75	0	0	0	1	0	0	1	0	0	0	-4.17131	3	0.640404	4	0	0	8	3	6.12245	9.53968	0	0	6
35	0	32.3399	0	0	11.9084	76.07	14.4052	0	73.5453	0	0	1	1	84.45	2	39.1978	0	0	1	0	112.12	7	4	4.90838	11.5322	3.5	0	0	0	0	0	9.97395	1	1	0	0	-6.33401	5	0.874051	5	0	1	7	1	7.35294	13.5586	0	1	6
36	0	7.00204	1	0	10.1574	63.6	0.0148601	0	16.9269	0	0	0	0	63.6	4	21.8803	0	0	1	0	103.973	4	0	4.05338	1.90293	-0.75	0	0	0	0	0	8.30739	0	0	0	0	-1.01928	4	0.583503	5	0	2	4	0	18.1818	3.13636	0	0	4
38	0	30.9704	0	0	12.7064	93.7	7.44226	0	69.7953	0	0	1	1	102.08	2	37.4715	0	1	1	0	121.673	11	2	5.70644	10.602	-1.75	0	0	0	0	0	0	1	1	0	0	-5.06934	2	0.884869	0	4	0	2	7	3.07692	11.5933	0	0	9
40	0	191.749	0	0	13.8911	278.8	0.103067	0	304.744	11	0	1	1	278.8	12	180.335	0	1	0	0	413.191	23	0	8.16336	20.9923	-35.25	0	0	0	0	0	12.0192	1	1	0	0	-7.73616	12	2.25587	12	0	12	44	11	6.12245	25.8725	0	0	23
41	0	191.749	0	0	13.8911	278.8	0.103067	0	304.744	11	0	1	1	278.8	12	180.335	0	1	0	0	413.191	23	0	8.16336	20.9923	-35.25	0	0	0	0	0	12.0192	1	1	0	0	-7.73616	12	2.25587	12	0	12	44	11	6.12245	25.8725	0	0	23
42	0	191.765	0	0	13.8839	278.8	0.103067	0	304.564	11	0	1	1	278.8	12	180.326	0	1	0	0	413.191	23	0	8.12954	21.2249	-35.25	0	0	0	0	0	12.0888	1	1	0	0	-7.75178	12	2.25606	12	0	12	43	11	6.12245	25.8784	0	0	23
44	171.418	22.2246	0	0	0	44.2	7.51492	2	41.3264	0	1	1	1	69.5	0	10.6667	2	0	0	0	30.6424	5	1	2.33015	7.42143	-1.75	0	0	0	0	5.83015	0	1	1	0	0	-4.20555	1	0.854794	2	1	0	0	3	1.88679	9.48308	0	0	3
45	52.4019	15.9911	0	0	11.2924	132.56	0.233867	1	30.6812	2	0	1	0	132.56	4	32.1212	0	1	0	0	191.086	9	0	4.72282	5.37731	-7.25	0	1	0	1	0	9.18267	1	0	0	0	-0.880136	4	0.841637	5	2	0	4	5	11.7647	6.74854	0	0	9
48	391.79	64.4624	0	0	12.8886	145.78	2.32372	2	117.421	4	2	1	1	202.26	3	61.5537	1	1	1	0	219.846	13	2	6.86732	14.2322	-6.75	0	0	0	2	0	11.6637	1	1	0	0	-5.74428	5	1.28925	6	1	3	20	6	5.10204	10.4351	0	0	11
49	0	36.1939	0	0	0	63.95	10.431	0	66.6853	0	0	1	1	63.95	0	25.457	0	0	0	0	78.1832	6	2	4.24211	8.89203	-3	0	0	0	0	0	0	1	1	0	0	-4.82851	4	1.09679	8	0	0	7	2	5.6338	8.77652	0	0	6
50	41.9924	12.1434	0	0	10.874	78.64	0.208717	1	23.6905	2	0	0	0	78.64	3	36.0317	0	1	0	0	136.944	7	0	5.273	4.26242	-6.75	0	1	0	1	0	8.81215	1	0	0	0	-0.53358	4	0.758964	5	1	0	4	2	14.2857	6.35	0	0	6
52	0	4.43133	0	0	0	104.08	0.0460009	0	12.5733	0	0	0	0	104.08	0	11.4319	0	0	0	0	131.589	4	1	1.42898	2.1021	2	0	0	0	0	0	0	0	0	0	0	-0.801833	0	0.443133	0	0	0	0	4	0	4.6	0	0	4
53	63.3242	16.5524	0	0	10.7219	83.1	4.19451	1	30.1728	0	1	1	1	108.4	4	21.9688	0	0	1	1	102.329	8	0	3.72192	6.31238	-0.75	0	0	0	0	0	0	1	1	1	0	-3.23826	2	0.82762	0	1	0	2	4	6.06061	7.89474	0	0	5
54	82.6731	20.0075	0	0	12.3272	64.09	18.0596	1	51.6415	0	0	1	1	64.09	3	27.3198	0	1	0	0	82.1798	5	3	5.69133	8.84228	5.75	0	0	0	0	0	0	1	1	0	0	-5.01356	3	0.689914	4	0	0	9	2	6.12245	10.3547	0	0	5
55	0	34.5384	0	0	11.9862	58.64	18.326	0	72.6648	0	0	1	1	58.64	2	88.5124	0	1	1	0	172.185	11	2	5.91627	9.12908	-7.25	0	0	0	1	0	0	1	1	0	1	-6.06881	3	1.01583	4	0	0	5	2	5.55556	10.4385	1	0	11
56	60.1992	12.9963	0	0	10.6897	83.1	1.89193	1	27.4447	0	1	1	1	108.4	4	20.3152	0	0	1	0	102.329	7	0	3.68966	5.31513	-0.25	0	0	0	0	0	0	1	1	0	0	-2.26592	2	0.684018	0	1	0	2	4	6.06061	7.60819	0	0	5
57	513.322	52.2427	0	0	12.8015	104.7	26.2902	3	105.227	2	0	1	1	104.7	2	46.7624	0	1	1	0	120.631	14	3	5.80152	16.8953	-7	0	0	0	1	0	0	1	1	0	0	-7.49618	4	1.06618	7	4	0	9	8	4.5977	13.8529	0	0	11
58	73.3549	17.7013	0	0	11.1476	72.19	9.58043	1	42.7744	0	1	1	1	100.43	2	24.0125	1	1	0	0	101.198	5	2	5.46661	7.61146	5.25	0	0	0	0	0	0	1	1	0	0	-4.33541	2	0.708053	2	0	0	4	2	4.65116	8.55667	0	0	4
59	20.2859	26.7438	0	0	0	62.16	2.16506	1	42.4891	3	0	0	0	62.16	0	31.373	0	0	0	0	110.491	5	1	5.79001	9.91644	-8.75	0	0	1	0	0	10.6444	1	0	0	0	-2.74141	4	1.16277	6	0	1	9	1	8.69565	15.5573	0	0	5
60	0	16.9063	0	0	11.2196	94.81	11.2047	0	37.7768	0	0	1	0	94.81	5	29.3657	0	1	1	0	113.812	7	1	4.88526	7.06328	-1.25	0	0	0	0	0	0	1	1	0	0	-3.30567	3	0.768467	1	2	0	8	4	7.89474	10.0952	0	0	6
61	195.546	27.8482	0	0	12.6806	46.5	12.7719	2	60.6465	0	0	1	1	46.5	1	19.881	1	1	0	0	57.2799	5	3	5.68064	10.1957	0.75	0	0	0	0	0	0	1	1	0	0	-5.44295	2	0.819064	3	0	0	3	3	3.07692	12.2246	0	0	4
63	0	28.2183	0	0	0	62.16	13.718	0	63.8167	0	0	1	1	62.16	0	27.4434	0	0	0	0	110.491	5	4	3.99846	10.4724	2.75	0	0	0	0	0	9.92739	1	1	0	0	-6.1782	4	0.82995	6	0	1	7	1	6.34921	13.2086	0	2	5
66	0	38.6812	0	0	11.9669	164.63	0.816305	0	76.927	1	0	1	1	164.63	5	77.8148	0	1	0	0	285.314	10	1	6.68344	12.3525	-7	0	0	1	0	0	10.4649	1	1	0	0	-2.30536	7	1.17216	7	0	3	24	3	11.6667	15.5114	0	1	10
67	74.3492	23.2978	0	0	12.2311	61.72	5.71297	1	52.5567	0	0	1	1	61.72	2	23.6455	2	1	0	0	76.1553	6	2	5.23105	8.56035	0	0	0	0	0	0	0	1	1	0	0	-4.12196	4	0.803372	7	0	0	7	2	7.27273	10.4409	0	0	5
68	76.3058	26.0988	0	0	11.2376	72.3	9.03347	1	47.8495	0	1	1	1	72.3	1	33.6607	0	1	1	0	96.3258	7	2	5.59465	8.75418	-3.5	1	0	0	1	0	0	1	1	0	1	-4.55828	3	0.9321	3	0	1	4	2	5.88235	10.5873	0	0	6
69	0	13.8359	0	0	10.6057	58.2	4.67178	0	27.5246	0	0	0	1	58.2	2	24.5735	0	1	0	0	101.271	5	1	4.56926	3.50867	-1.75	0	0	0	0	0	0	1	1	0	0	-2.55624	2	0.728204	2	0	0	3	2	5.26316	6.70175	0	0	5
70	0	23.9114	1	0	10.534	37.3	19.1822	0	37.709	0	0	0	1	37.3	6	14.9988	0	0	1	0	67.8283	2	0	3.53401	5.05749	-2.5	0	0	0	0	0	8.65283	0	1	0	0	-4.94439	2	1.08688	2	0	0	2	0	4	7.21212	0	0	2
71	0	23.9114	1	0	10.534	37.3	19.1822	0	37.709	0	0	0	1	37.3	6	14.9988	0	0	1	0	67.8283	2	0	3.53401	5.05749	-2.5	0	0	0	0	0	8.65283	0	1	0	0	-4.94439	2	1.08688	2	0	0	2	0	4	7.21212	0	0	2
72	93.6469	41.8545	0	0	12.4314	111.5	18.0707	1	89.4756	0	0	1	1	111.5	3	60.2157	2	1	1	0	150.253	10	3	7.06996	13.8849	-1.25	0	0	0	0	0	10.1443	1	1	0	0	-6.37642	5	1.04636	6	0	1	19	3	7.69231	11.5744	0	0	7
73	138.269	27.8129	0	0	12.7244	101.82	3.84257	2	52.0112	1	0	1	1	101.82	2	29.5587	0	1	0	0	124.299	9	0	5.7244	9.93976	-7.25	0	0	0	0	0	0	1	1	0	0	-2.9841	2	0.959065	3	3	0	6	7	3.7037	11.197	0	0	8
74	53.3209	14.7322	0	0	12.8139	77.25	12.1532	1	38.4121	0	0	1	0	77.25	1	23.0418	0	1	0	0	100.272	6	2	5.8139	7.84372	3	0	0	0	0	4.89113	0	1	1	0	0	-4.1046	3	0.64053	4	3	2	6	3	8.33333	12.0237	0	0	6
75	0	10.961	0	0	0	41.03	2.04632	0	20.4258	0	0	1	0	41.03	1	16.421	0	0	0	0	53.6723	4	0	4.4951	2.41837	-2	0	0	0	0	0	0	0	0	0	0	-1.40329	2	0.782929	0	0	0	0	2	7.14286	4.98901	0	0	2
76	0	35.2671	0	0	12.5334	79.31	10.4103	0	80.1221	0	0	1	1	87.69	2	41.8661	0	1	1	0	113.639	8	4	5.53338	12.0563	2	0	0	0	0	0	10.0148	1	1	0	0	-6.25618	5	0.904284	5	0	1	7	2	6.84932	13.776	0	1	7
77	0	17.1841	0	0	11.4475	69.39	8.50863	0	38.6067	1	0	1	0	69.39	2	26.3627	0	1	1	0	94.1869	4	2	5.07594	7.03357	1.75	0	0	0	0	0	0	1	0	0	0	-3.50019	3	0.781094	4	0	0	8	1	7.69231	12.039	0	0	4
78	0	12.9054	0	0	11.9355	55.62	4.48392	0	29.7796	2	0	0	0	55.62	1	17.8564	0	1	0	0	69.042	3	2	4.93551	6.76486	1.5	0	0	0	0	0	0	1	0	0	0	-3.17346	2	0.679232	3	0	0	2	1	6.25	12.7719	0	0	3
79	32.1532	8.08131	0	0	11.2633	33.2	0.565995	1	16.9221	1	0	0	0	33.2	1	10.6694	0	1	0	0	45.0548	3	0	4.26333	3.63043	-1	0	0	0	0	0	0	1	0	0	0	-1.75079	1	0.621639	1	0	0	1	2	4	6.01282	0	0	3
80	0	100.232	0	0	12.9782	221.29	5.39271	0	186.389	7	0	1	1	221.29	7	147.919	0	1	1	0	351.93	15	3	8.4838	20.408	-11.25	0	0	1	0	0	11.7799	1	1	0	0	-6.01547	14	1.61664	19	0	14	72	1	12.3894	17.6378	0	0	15
81	87.1224	19.122	0	0	12.355	85.84	12.087	2	42.226	0	0	1	1	85.84	1	26.77	1	1	0	0	106.057	8	1	5.355	8.72515	-1.5	0	0	0	0	5.26302	0	1	1	0	0	-4.26722	2	0.79675	2	2	0	2	5	5.26316	12.4819	0	0	6
82	0	16.9942	0	0	12.3521	78.14	6.23398	0	48.3973	0	0	1	0	78.14	2	34.6159	0	1	0	0	122.746	6	2	6.07198	8.12711	7.75	0	0	0	0	0	0	1	1	0	1	-4.59653	1	0.629416	1	0	0	4	4	2.5	11.6097	0	0	6
83	22.5214	7.51815	0	0	11.3728	65.34	0.0177537	1	18.3828	1	0	0	0	65.34	4	21.0722	0	1	0	0	90.1095	6	0	4.44657	4.06048	-4	0	1	0	1	0	0	1	0	0	0	-0.816191	2	0.578319	2	3	0	0	4	9.52381	7.20513	0	0	6
84	22.5214	8.28084	0	0	11.4075	65.01	0.00183852	1	18.3828	1	0	0	0	65.01	3	20.4291	0	1	0	0	91.3348	6	0	4.49866	4.06048	-5.5	0	1	0	1	0	0	1	0	0	0	-0.66283	2	0.636988	2	3	0	0	4	8.69565	7.20513	0	0	6
86	71.7172	17.7572	0	0	11.0765	86.01	4.43413	1	42.9178	1	0	1	1	86.01	3	21.954	0	0	1	0	106.678	7	1	4.07648	7.28024	0	0	0	0	0	0	0	1	1	0	0	-3.32878	2	0.710289	0	1	0	4	5	4.34783	9.28333	0	0	6
88	182.487	32.3021	0	0	12.3144	43.86	12.5347	2	52.9713	0	1	1	1	72.1	2	24.9422	1	1	0	0	59.6628	7	1	6.05637	10.6045	-5.25	0	0	0	0	0	0	1	1	0	0	-5.36391	2	1.11387	2	1	0	5	3	3.63636	9.75123	0	0	5
89	0	3.45908	0	0	10.4231	43.09	1.67441	0	9.97478	0	0	0	0	43.09	1	8.79593	0	1	0	0	58.0421	2	1	3.42315	1.80083	2.5	0	0	0	0	0	0	1	0	0	0	-1.61247	1	0.384342	1	0	0	0	1	6.25	4.44444	0	0	2
90	0	18.512	0	0	12.4511	85.61	0.67388	0	35.385	2	0	1	0	85.61	1	27.6837	0	1	0	0	116.063	7	1	5.45109	5.89371	-5.25	0	0	0	0	0	0	1	0	0	0	-2.15832	3	0.881525	5	0	1	5	3	7.31707	7.57143	0	0	6
92	89.3858	16.706	0	0	0	101.88	5.91327	2	32.7087	2	0	1	1	101.88	1	20.3769	0	0	0	0	143.948	7	0	3.25714	6.71135	-5.25	0	0	0	0	0	9.25714	1	0	0	0	-2.49912	1	0.795523	1	6	0	2	6	2.5641	9.23333	0	0	6
93	0	3.54223	0	0	0	60.69	1.87605	0	5.73059	1	0	0	0	60.69	0	12.0324	0	0	0	0	128.05	3	0	2.16667	0.288675	-3.25	0	0	0	0	0	7.92477	0	0	0	0	0.621823	3	0.590372	3	0	0	0	0	21.4286	2.06667	0	0	3
94	143.608	20.0457	0	0	0	27.05	16.327	2	38.0961	1	1	1	0	55.29	0	19.5948	0	0	0	0	27.7854	7	1	2.5935	8.30453	-1	0	0	0	0	0	0	1	0	0	0	-5.36721	1	0.871552	2	1	0	0	2	2.77778	7.50198	0	0	2
96	0	12.4848	1	0	10.7624	37.3	10.4357	0	21.8547	0	0	0	0	37.3	1	14.0131	0	0	1	0	67.8283	2	1	3.76243	3.16072	-0.5	0	0	0	0	0	8.85016	0	1	0	0	-3.33356	2	0.832322	2	0	0	2	0	6.06061	5.21905	0	0	2
97	37.4146	36.2768	0	0	11.8086	94.83	2.33444	1	52.4583	1	0	0	1	94.83	4	47.8584	0	0	0	0	178.34	5	0	5.3504	9.71611	-9.75	0	0	1	0	0	9.36312	0	1	0	0	-3.00686	5	1.39526	5	0	1	10	0	9.25926	14.3908	0	0	5
98	0	23.6075	0	0	12.1725	68.17	6.46269	0	50.0937	0	0	1	1	68.17	3	24.1711	0	1	0	0	108.628	6	2	5.17249	7.75068	-1.5	0	0	0	0	0	10.2121	1	1	0	0	-3.72436	2	0.814051	2	0	0	3	4	3.50877	9.94581	0	1	6
99	0	3.23236	1	0	9.57407	63.32	8.51292	0	6.13077	1	0	0	0	63.32	1	10.5509	0	0	1	0	100.725	3	0	2.57407	0	-1.75	0	0	0	0	0	7.86574	0	0	0	0	0.459828	2	0.538727	2	0	0	0	1	15.3846	1.93333	0	0	3
100	0	20.0662	0	0	11.6144	64.63	3.63482	0	43.3157	0	0	1	1	64.63	3	48.53	0	0	1	0	135.181	8	1	5.06957	6.06778	-3.75	0	0	0	0	0	0	1	1	0	1	-3.9072	4	0.83609	6	0	0	4	1	10	7.87319	0	0	8
104	60.5209	18.518	0	0	12.9884	81.93	14.2625	1	43.5892	1	0	1	1	81.93	1	23.4044	0	1	0	0	104.022	7	2	5.98839	8.23789	2.5	0	0	0	0	0	0	1	1	0	0	-4.3623	2	0.740722	3	5	1	4	5	4.7619	12.1667	0	0	6
107	45.636	13.6171	0	0	0	81.99	9.03719	1	37.658	0	0	1	0	81.99	0	15.2999	0	0	0	0	99.9168	6	0	2.14826	7.59184	5	0	0	0	0	0	0	1	0	0	0	-3.79856	0	0.592049	0	3	0	0	6	0	10	0	0	5
108	0	63.3233	0	0	11.7557	169.52	0.201803	0	110.292	4	0	1	1	169.52	9	74.3928	0	1	1	0	248.306	12	0	6.69306	11.1115	-14.25	0	0	0	1	0	11.2812	1	1	0	0	-3.91017	8	1.43917	11	0	3	25	4	8.69565	17.3732	0	0	12
109	0	63.3233	0	0	11.7557	169.52	0.201803	0	110.292	4	0	1	1	169.52	9	74.3928	0	1	1	0	248.306	12	0	6.69306	11.1115	-14.25	0	0	0	1	0	11.2812	1	1	0	0	-3.91017	8	1.43917	11	0	3	25	4	8.69565	17.3732	0	0	12
110	49.8956	23.7568	0	0	12.609	46.92	2.17419	1	40.6865	1	0	1	0	46.92	1	16.906	1	1	0	0	59.8187	5	1	5.609	8.04547	-6.5	0	0	0	0	0	0	1	0	0	0	-2.09242	1	0.989865	1	0	0	4	4	1.96078	10.6558	0	0	3
111	0	22.4962	0	0	12.6724	60.85	3.4953	0	38.547	1	0	1	1	69.23	2	31.2383	0	1	1	0	91.6392	6	1	5.67238	7.4632	-5	0	0	0	0	0	9.5201	1	1	0	0	-3.21997	3	0.978095	1	0	2	2	2	6.12245	8.21344	0	1	5
112	0	24.0213	0	0	0	40.16	5.91203	0	47.0546	1	0	1	1	40.16	0	18.2885	0	0	0	0	47.1239	5	2	2.16243	9.05609	-3.25	0	0	0	0	0	0	1	1	0	0	-4.14172	4	0.923895	8	0	0	8	1	7.84314	15.1538	0	0	5
113	86.3794	19.4307	0	0	0	52.83	9.23735	1	52.2721	0	0	1	0	52.83	0	14.3036	0	0	0	0	61.234	5	2	2.45555	9.63066	7.25	0	0	0	0	0	0	1	1	0	0	-5.33215	1	0.647689	2	0	0	3	4	2	11.9402	0	0	4
114	24.7694	9.73604	0	0	11.5234	56.22	0.0844753	1	20.9536	1	0	0	0	56.22	3	20.7337	0	1	0	0	76.4483	6	0	4.72991	4.48184	-6.25	0	1	0	1	0	0	1	0	0	0	-1.0273	2	0.695431	2	3	0	1	4	7.69231	7.2967	0	0	6
115	0	16.0538	0	0	12.501	67.15	11.8489	0	42.3449	0	0	1	0	67.15	1	17.1592	0	1	0	0	94.0636	4	3	5.50099	6.93814	5.5	0	0	0	0	0	0	1	1	0	0	-4.19804	1	0.642151	1	0	0	3	3	2.17391	8.82667	0	0	4
116	52.4019	15.5349	0	0	11.3233	128.95	1.22214	1	30.6812	2	0	1	0	128.95	5	33.1721	0	1	0	0	170.196	9	0	4.72595	5.37731	-6.25	0	1	0	1	0	9.16788	1	0	0	0	-0.304617	4	0.817626	5	2	0	4	5	11.7647	6.74854	0	0	7
118	95.3066	30.7789	0	0	12.3159	43.86	14.2364	1	58.1024	0	0	1	1	43.86	2	35.05	0	1	0	0	74.6229	6	2	6.28236	9.28797	-4.5	0	0	0	0	0	0	1	1	0	1	-4.66891	2	0.992867	2	1	0	5	3	3.27869	10.0968	0	0	6
119	0	41.4593	0	0	12.4252	176.61	0.178941	0	82.5	4	0	1	1	176.61	3	89.2001	0	0	1	0	301.065	10	2	6.33007	12.635	-5.5	0	0	1	0	0	10.0979	1	1	0	0	-3.30711	9	1.15165	11	0	8	25	1	14.2857	16.5508	0	2	10
121	57.8919	11.8321	0	0	0	110.85	1.64966	1	35.4724	0	0	1	1	110.85	0	24.2608	1	1	0	0	134.82	7	0	3.40251	6.59802	5	0	0	0	0	5.28472	0	1	1	0	0	-3.07307	2	0.537822	4	3	0	1	5	6.06061	8.22078	0	0	7
122	0	18.0181	0	0	12.3203	82.15	5.86272	0	39.0266	0	0	1	1	82.15	3	26.596	0	1	0	0	121.922	6	1	5.32026	7.13416	-1.75	0	0	0	0	0	8.98225	1	1	0	0	-2.76884	2	0.783397	2	2	1	4	4	4.87805	10.0316	0	0	6
124	0	43.2545	0	0	0	145.44	4.11671	0	75.3597	0	0	1	1	145.44	0	45.5281	0	0	0	0	250.373	12	0	3.64432	10.9677	-13.5	0	0	0	0	0	9.64432	1	1	0	0	-3.0297	4	1.20151	4	8	0	8	8	5.26316	11.1905	0	0	12
125	102.372	36.2642	0	0	0	54.77	31.5392	1	77.493	1	0	1	0	54.77	0	44.3294	1	0	0	0	114.473	8	2	5.54763	11.0186	-1.5	0	0	0	0	0	0	1	0	0	1	-7.02095	0	0.980114	0	2	0	0	5	0	11.2538	0	0	7
127	180.785	34.1973	0	0	13.6737	78.84	28.4896	2	87.0252	0	0	1	1	78.84	5	45.4407	0	1	0	0	113.11	6	5	6.81812	14.7575	8.5	0	0	0	0	0	0	1	1	0	0	-6.8704	3	0.834081	3	1	0	8	3	4.54545	14.7646	0	0	6
128	0	0.507545	0	0	0	48.38	5.26964	0	1.91421	0	0	0	0	48.38	0	3	0	1	0	0	73.7425	3	0	0.75	0	0.75	0	0	0	0	0	6.75	0	0	0	0	0.198029	1	0.169182	0	0	0	0	2	25	1.33333	0	0	2
129	0	20.8083	0	0	11.4944	83.95	14.7453	0	43.5697	0	0	1	0	83.95	5	32.0939	0	1	1	0	98.926	7	1	5.48457	7.8105	-2.5	0	0	0	0	0	0	1	1	0	0	-3.77692	3	0.867013	1	2	0	10	4	6.81818	9.98188	0	0	6
130	0	10.0995	1	0	10.4738	103.78	5.26957	0	21.7936	1	0	0	0	103.78	1	26.0918	0	0	1	0	100.725	6	1	3.47381	2.88855	-1.5	0	0	0	0	0	8.58113	1	0	0	0	-0.353792	4	0.673297	2	0	0	6	1	14.8148	5.25714	0	0	5
131	59.1415	30.0765	0	0	0	49.56	16.8469	1	54.5038	0	0	1	0	49.56	0	13.6352	0	0	0	0	56.4827	6	0	1.8889	8.72727	-3.25	0	0	0	0	0	0	1	0	0	0	-4.88658	0	1.07416	0	3	0	0	6	0	9.94444	0	0	5
132	223.214	102.997	0	0	13.002	154.1	7.26173	3	175.024	3	0	1	1	154.1	4	94.6992	2	0	1	0	214.174	13	2	8.32199	23.3087	-19	0	0	2	0	0	11.9761	1	1	0	0	-6.5846	9	1.74571	13	0	3	47	4	7.69231	22.4278	0	0	12
133	66.943	18.1241	0	0	11.3534	44.81	3.49263	2	33.6391	0	0	1	0	44.81	1	14.9807	0	1	1	0	60.4042	5	1	4.35337	6.97102	-5.25	1	0	0	1	0	0	1	1	0	0	-3.00886	2	0.906203	3	1	0	4	3	4.87805	10.0737	0	0	5
134	0	15.9239	0	0	11.1743	63.6	14.8915	0	36.0789	1	0	0	1	63.6	2	29.4905	0	0	1	0	103.973	4	2	5.2646	6.60769	1.75	0	0	0	0	0	9.14279	0	1	0	0	-4.12121	4	0.723815	5	0	4	5	0	10.5263	9.71861	0	0	4
135	22.5441	17.2346	0	0	12.8722	39.82	9.48443	1	39.1769	0	0	1	0	39.82	6	16.0495	0	1	0	0	48.1791	4	1	5.87216	9.19014	-0.25	0	0	0	0	0	0	1	0	0	0	-3.92425	1	0.749332	1	1	0	2	3	2.63158	17.7905	1	0	4
137	0	16.1256	0	0	11.0042	75.27	0.572539	0	26.1886	0	0	0	0	75.27	3	27.5821	0	1	0	0	111.456	5	0	4.89162	4.9464	-5.25	0	2	0	1	0	0	1	0	0	0	-1.90262	3	1.00785	3	1	0	5	2	8.82353	5.13333	0	0	5
138	0	2.81812	0	0	0	9.23	0.915736	0	6.60412	0	0	0	0	9.23	2	12.46	0	0	0	0	40.9201	3	0	2.85458	0.353553	-2	0	0	0	0	0	0	0	0	0	0	-1.01145	1	0.402589	2	0	0	0	0	9.09091	2.66667	0	0	3
139	0	2.81812	0	0	0	9.23	0.915736	0	6.60412	0	0	0	0	9.23	2	12.46	0	0	0	0	40.9201	3	0	2.85458	0.353553	-2	0	0	0	0	0	0	0	0	0	0	-1.01145	1	0.402589	2	0	0	0	0	9.09091	2.66667	0	0	3
140	0	3.13221	1	0	9.44907	57.53	0.493774	0	6.13077	1	0	0	0	57.53	1	12.4398	0	0	1	0	110.512	3	0	2.44907	0	-1.75	0	0	0	0	0	7.74074	0	0	0	0	-0.133223	3	0.522034	3	0	0	0	0	25	1.93333	0	0	3
141	91.4648	27.6156	0	0	11.5751	39.68	11.8263	1	47.7388	0	0	1	0	39.68	1	44.8949	0	1	0	0	96.1837	9	0	4.94861	7.18561	-10.5	0	0	0	0	0	0	1	1	0	1	-4.3215	1	1.0228	1	1	0	1	4	1.96078	9.25641	0	0	8
142	0	28.5814	0	0	0	65.72	14.6335	0	66.4729	0	0	1	1	65.72	0	26.2955	0	0	0	0	98.8668	5	4	3.95632	10.6947	4.75	0	0	0	0	0	9.95632	1	1	0	0	-6.32549	3	0.816613	5	0	1	6	2	4.7619	13.4185	0	1	5
143	19.1001	18.8267	0	0	0	50.72	2.84905	1	32.7711	2	0	1	0	50.72	1	19.7186	0	0	0	0	82.6939	4	1	3.91567	7.54243	-5.25	0	0	0	0	0	9.91567	1	0	0	0	-2.65933	3	0.941333	5	0	0	6	1	7.69231	13.9579	0	0	4
144	0	102.182	0	0	12.9763	221.29	7.12919	0	190.754	7	0	1	1	221.29	7	158.857	0	1	1	0	366.89	16	3	8.48164	20.408	-12	0	0	1	0	0	11.7641	1	1	0	1	-6.28181	14	1.62194	19	0	14	72	1	12.3894	17.7204	0	0	16
148	0	25.7545	0	0	11.5991	93.18	15.5542	0	52.8289	0	0	1	1	93.18	5	45.7187	0	1	1	0	124.886	9	1	5.68186	8.20036	-5.25	0	0	0	0	0	0	1	1	0	1	-3.97325	4	0.919803	3	2	1	12	4	7.84314	8.79894	0	0	8
149	48.8418	20.3229	0	0	12.4239	62.3	2.01492	1	35.3422	5	0	1	1	62.3	1	27.7	0	0	1	0	92.9524	5	1	5.42388	7.46108	-7.25	0	0	0	0	0	9.55779	1	1	0	0	-2.21124	4	0.923769	6	0	1	8	1	9.30233	8.59307	0	0	5
150	81.8159	26.841	0	0	12.2057	61.72	8.84209	1	62.6578	0	0	1	1	61.72	2	53.697	2	1	0	0	121.036	9	2	5.40991	8.56035	-2.25	0	0	0	0	0	0	1	1	0	1	-4.97804	4	0.83878	7	0	0	7	2	7.27273	11.1411	0	0	8
151	0	25.7069	0	0	0	8.17	16.4734	0	42.8892	1	2	1	0	61.71	0	6.83062	0	0	0	0	6.24863	4	2	0.562827	9.24304	-2	0	0	0	0	0	0	1	0	0	0	-5.65095	0	1.02827	0	0	0	0	2	0	12.8667	0	0	2
152	0	17.5891	0	0	0	55.04	4.94062	0	26.9304	1	0	1	0	55.04	0	10.4151	0	0	0	0	69.5926	4	0	1.69225	5.76088	-5.5	0	0	0	0	0	0	1	0	0	0	-2.82498	0	0.977171	0	3	0	0	4	0	11.4641	0	0	4
153	0	5.65911	0	0	0	0	5.85009	0	8.3094	0	0	0	0	0	0	22.5382	0	0	0	0	59.8405	5	0	3	0	-4	0	0	0	0	0	0	0	0	0	0	-2.72865	0	0.808444	0	0	0	0	0	0	2	0	0	4
155	81.4668	18.0377	0	0	13.0345	39.82	6.07373	2	36.5962	0	0	1	0	39.82	1	15.642	2	0	0	0	41.9305	4	1	6.03451	7.81708	-1.25	0	0	0	0	0	0	1	0	0	0	-3.76397	1	0.819896	1	1	0	3	3	2.43902	11.7749	0	0	2
156	0	23.6673	0	0	13.4945	29.1	32.0826	0	54.4881	1	0	1	0	29.1	1	16.3481	0	1	0	0	43.1557	2	4	6.49455	9.33225	6.75	0	0	0	0	0	0	1	0	0	0	-6.47297	1	0.816113	1	0	0	5	1	1.85185	11.0788	0	0	2
157	0	27.7386	0	0	11.8623	59.08	7.13403	0	57.3184	2	1	1	1	84.38	2	30.5452	0	1	1	0	78.5383	7	2	6.55527	9.21407	-2	0	0	0	0	0	0	1	1	0	0	-4.13905	4	0.956502	6	0	1	14	2	7.27273	11.1256	0	0	6
158	0	27.7386	0	0	11.8623	59.08	7.13403	0	57.3184	2	1	1	1	84.38	2	30.5452	0	1	1	0	78.5383	7	2	6.55527	9.21407	-2	0	0	0	0	0	0	1	1	0	0	-4.13905	4	0.956502	6	0	1	14	2	7.27273	11.1256	0	0	6
159	96.756	33.8553	0	0	12.8364	37.61	27.5204	1	65.7342	0	1	1	1	65.85	5	37.7657	0	1	0	0	78.0993	7	2	5.83641	11.3401	-2.75	0	0	0	1	0	0	1	1	0	1	-6.31223	1	0.995743	1	1	0	2	3	1.69492	11.2014	0	0	6
161	0	11.7058	0	0	10.9585	87.28	6.7244	0	34.7758	0	0	1	0	87.28	4	28.2337	0	1	1	0	110.688	6	2	4.6894	6.19796	5	0	0	0	0	0	0	1	1	0	0	-3.59262	3	0.557418	1	0	0	5	3	9.375	10.0952	0	0	5
162	0	22.2275	0	0	12.7986	39.19	8.9998	0	38.7631	1	0	1	1	39.19	1	19.4649	0	0	0	0	52.9303	3	1	5.79859	6.80691	-2.25	0	0	0	0	0	0	1	1	0	0	-4.41444	2	0.966411	3	0	0	2	1	4.16667	9.41502	0	0	3
163	0	36.9464	0	0	13.59	46.33	38.0659	0	81.426	0	0	1	0	46.33	1	81.8202	0	1	0	0	150.927	9	3	6.59	8.54005	-0.75	0	0	0	0	0	0	1	0	0	1	-7.50918	1	1.05561	1	0	0	6	2	1.69492	9.71765	0	0	9
164	19.0831	23.4515	0	0	12.5238	70	1.30754	1	40.0754	2	0	0	0	70	1	36.1259	0	0	0	0	124.636	5	1	5.63538	9.55896	-6.5	0	0	1	0	0	10.2009	1	0	0	0	-2.5847	4	1.06598	5	0	1	9	1	9.7561	15.4632	0	1	5
165	0	6.44156	0	0	0	0	6.78141	0	8.3094	0	0	0	0	0	0	18.8654	0	0	0	0	44.8803	5	0	2.99942	0	-4	0	0	0	0	0	0	0	0	0	0	-3.00146	0	0.920222	0	0	0	0	0	0	2	0	0	3
166	0	17.0394	0	0	0	68.62	3.79328	0	41.0114	0	0	1	1	68.62	0	19.4153	0	0	0	0	123.287	5	2	4.083	6.76805	2.25	0	0	0	0	0	9.29416	1	1	0	0	-3.64621	2	0.709976	2	0	0	6	3	4.44444	10.2065	0	1	5
167	21.2151	14.5557	0	0	0	21.26	13.5007	1	29.3487	0	0	0	0	21.26	0	12.0571	0	0	0	0	29.0106	3	2	2.60738	7.08612	0.25	0	0	0	0	0	0	1	0	0	0	-4.45825	1	0.766091	2	0	0	0	1	3.0303	14.4971	0	0	2
168	51.7342	22.3507	0	0	0	42.52	7.19919	1	41.5125	2	0	1	1	42.52	0	15.4329	0	0	0	0	58.0213	4	2	2.36927	7.97718	-3	0	0	0	0	0	0	1	1	0	0	-3.85511	2	0.894026	4	0	1	4	2	3.92157	11.0067	0	0	4
171	109.486	121.961	0	0	14.3661	170.06	3.34568	1	171.744	12	0	0	1	170.06	5	106.924	0	0	1	0	263.194	14	0	7.3661	20.3356	-33.5	0	0	1	0	0	10.5117	0	1	0	0	-7.32155	14	1.96711	24	0	6	35	0	10.2941	22.2443	0	0	14
174	0	7.13025	0	0	0	9.23	3.12033	0	13.621	0	0	0	0	9.23	0	31.778	0	0	0	0	85.8005	7	0	3.21921	0	-6.5	0	0	0	0	0	0	0	0	0	0	-2.60014	1	0.713025	2	0	0	0	0	8.33333	2.73333	0	0	6
175	0	7.43569	0	0	0	35.82	3.48036	0	15.5724	0	0	1	0	35.82	0	6.70382	0	0	0	0	49.0701	2	1	2.29262	2.51238	1.75	0	0	0	0	0	0	1	0	0	0	-1.99636	0	0.571976	0	0	0	0	2	0	5.5641	0	0	2
176	33.5259	23.6598	0	0	13.0827	51.02	5.90794	1	41.7112	1	1	1	0	79.26	2	18.5844	1	1	0	0	64.9646	6	0	6.08274	9.23924	-4.25	0	0	0	0	0	0	1	0	0	0	-4.40412	1	0.985825	1	1	0	4	4	2.17391	12.3587	1	0	5
177	0	31.3391	0	0	12.56	54.46	13.6456	0	63.1514	1	0	1	1	54.46	1	49.2183	0	1	0	0	118.946	8	2	5.55998	8.98599	-3.75	0	0	0	0	0	0	1	1	0	1	-5.40082	2	0.921739	3	0	0	3	3	3.22581	12.4064	0	0	8
178	0	24.633	0	0	0	23.47	14.2632	0	36.2003	1	0	0	1	23.47	1	12.2791	0	0	0	0	45.8077	2	1	3.86526	6.54386	-5	0	0	0	0	0	9.86526	1	1	0	0	-4.45514	1	1.173	1	0	0	3	1	2.08333	10.8	0	1	2
179	36.5389	18.2376	0	0	12.1287	32.67	11.7838	1	35.6745	0	1	1	0	60.91	2	18.175	1	1	0	0	45.0548	5	1	5.12872	7.6882	0.25	0	0	0	0	0	0	1	0	0	0	-4.5594	1	0.868456	1	0	0	3	2	2.77778	9.57619	0	0	3
180	0	191.765	0	0	13.8839	278.8	0.103067	0	304.564	11	0	1	1	278.8	12	180.326	0	1	0	0	413.191	23	0	8.12954	21.2249	-35.25	0	0	0	0	0	12.0888	1	1	0	0	-7.75178	12	2.25606	12	0	12	43	11	6.12245	25.8784	0	0	23
181	0	57.7494	0	0	11.2048	125.23	12.999	0	91.9922	2	2	1	1	175.83	5	58.534	0	1	1	0	169.601	11	1	5.67524	9.03252	-9.5	0	0	0	0	0	0	1	1	0	0	-5.31707	7	1.44374	10	0	2	22	2	8.33333	9.25	0	0	9
182	19.302	23.0742	0	0	0	41.93	4.70331	1	38.4133	3	0	0	0	41.93	1	21.0453	0	0	0	0	67.8074	4	1	4.55421	9.35335	-7	0	0	0	0	0	10.5542	1	0	0	0	-3.08377	3	1.04883	5	0	0	8	1	6.97674	15.5065	0	0	4
183	19.302	23.0742	0	0	0	41.93	4.70331	1	38.4133	3	0	0	0	41.93	1	21.0453	0	0	0	0	67.8074	4	1	4.55421	9.35335	-7	0	0	0	0	0	10.5542	1	0	0	0	-3.08377	3	1.04883	5	0	0	8	1	6.97674	15.5065	0	0	4
184	0	54.6454	0	0	13.4868	186.45	0.0237659	0	101.517	5	0	1	1	186.45	2	103.028	0	0	1	0	342.514	12	2	6.58785	15.4074	-11.25	0	0	1	0	0	10.3945	1	1	0	0	-3.8532	11	1.30108	14	0	10	33	1	14.2857	17.554	0	3	12
185	0	54.6454	0	0	13.4868	186.45	0.0237659	0	101.517	5	0	1	1	186.45	2	103.028	0	0	1	0	342.514	12	2	6.58785	15.4074	-11.25	0	0	1	0	0	10.3945	1	1	0	0	-3.8532	11	1.30108	14	0	10	33	1	14.2857	17.554	0	3	12
186	0	23.2552	0	0	12.7689	61.6	9.70302	0	53.7237	0	0	1	0	61.6	1	18.9029	0	1	0	0	82.3015	5	3	5.76892	8.51314	1.5	0	0	0	0	0	0	1	1	0	0	-4.61119	1	0.775173	1	0	0	3	4	1.72414	10.2736	0	0	5
187	0	5.86717	0	0	0	55.48	0.553681	0	13.8266	0	0	0	0	55.48	0	12.2488	0	0	0	0	86.5804	3	1	3.3838	2.70473	0.5	0	0	0	0	0	9.3838	1	0	0	0	-1.50611	2	0.533379	3	0	0	0	1	9.09091	4.90909	0	1	3
188	19.302	24.1353	0	0	12.5576	38.77	2.66575	1	38.4133	2	0	0	0	38.77	4	23.0941	0	0	0	0	50.269	4	0	5.5576	9.35335	-9	0	0	0	0	0	0	1	0	0	0	-2.6594	3	1.09706	5	0	0	8	1	6.97674	15.5065	0	0	4
189	75.4618	28.9228	0	0	0	48.83	12.9406	1	53.6438	2	1	1	1	77.07	0	37.6873	1	0	0	0	106.638	8	2	5.22786	9.11335	-4.75	0	0	0	0	0	10.2671	1	1	0	1	-4.87248	2	0.964093	3	1	0	5	3	3.63636	10.7172	0	0	7
190	75.4618	28.9228	0	0	0	48.83	12.9406	1	53.6438	2	1	1	1	77.07	0	37.6873	1	0	0	0	106.638	8	2	5.22786	9.11335	-4.75	0	0	0	0	0	10.2671	1	1	0	1	-4.87248	2	0.964093	3	1	0	5	3	3.63636	10.7172	0	0	7
191	0	12.6211	0	0	12.1227	58.36	6.27852	0	31.4969	0	0	1	0	58.36	1	14.6984	0	1	0	0	79.1772	4	2	5.12272	5.07285	2.25	0	0	0	0	0	0	1	0	0	0	-3.12878	1	0.631056	1	0	0	2	3	2.5641	7.24737	0	0	4
192	0	23.2597	0	0	12.44	61.92	14.2696	0	49.2803	0	0	1	0	61.92	3	48.4263	0	1	0	0	124.119	8	1	5.43998	7.46857	-3.75	0	0	0	0	0	0	1	1	0	1	-4.30506	1	0.894603	1	2	0	2	4	2.32558	9.96308	0	0	8
193	0	12.9003	0	0	11.7374	61.69	9.71043	0	32.7735	0	0	1	0	61.69	2	23.3962	0	1	0	0	102.625	5	2	4.73743	6.17463	2.75	0	0	0	0	0	9.79836	1	0	0	0	-3.85053	2	0.645013	2	0	0	7	2	6.45161	10.0474	0	0	4
194	0	28.2008	0	0	13.0596	33.2	24.1554	0	67.611	0	0	1	0	33.2	1	75.4685	0	1	0	0	134.815	9	2	6.05961	7.82213	-0.5	0	0	0	0	0	0	1	0	0	1	-6.48371	1	0.881276	1	0	0	5	2	2	9.96774	1	0	9
195	73.8579	20.1025	0	0	0	63.41	11.8831	1	45.5665	0	0	1	1	63.41	0	17.8104	0	0	0	0	90.2561	6	2	3.40091	7.53696	-0.25	0	0	0	0	0	9.40091	1	1	0	0	-3.79943	2	0.773175	3	2	0	3	4	4	8.66769	0	0	5
196	0	28.4761	0	0	0	41.93	21.0512	0	63.8167	0	0	1	1	41.93	0	31.1912	0	0	0	0	82.7675	5	4	5.9525	10.1648	2.25	0	0	0	0	0	9.91086	1	1	0	1	-6.6044	3	0.837531	5	0	1	5	1	4.83871	13.2086	0	1	5
200	72.1364	29.6418	0	0	0	12.47	26.8236	1	49.9126	4	0	1	0	12.47	0	29.7704	0	0	0	0	44.0444	4	2	5.4237	8.16204	-5.25	0	0	0	0	0	0	1	0	0	1	-5.68724	1	1.05863	2	0	0	1	1	1.75439	9.31746	0	0	4
201	73.3549	18.1944	0	0	12.5231	58.36	10.0437	1	42.7744	0	1	1	0	86.6	1	16.3527	1	1	0	0	79.1772	5	2	5.52313	7.61146	3.25	0	0	0	0	0	0	1	0	0	0	-4.44634	1	0.727776	1	0	0	3	3	2.17391	8.55667	0	0	4
202	64.6981	15.9691	0	0	0	16.13	10.6305	1	32.3574	0	0	1	0	16.13	1	6.75336	0	0	0	0	19.9098	2	1	1.53631	5.85983	0.75	0	0	0	0	0	0	1	0	0	0	-4.14893	0	0.760433	0	0	0	0	2	0	7.3	0	0	2
204	0	6.47372	0	0	0	26.02	5.15819	0	12.7368	1	0	0	0	26.02	0	12.1584	0	0	0	0	47.8573	2	1	4.43639	2.35547	-0.5	0	0	0	0	0	0	1	0	0	0	-2.3008	0	0.58852	0	0	0	0	1	0	5.09091	0	0	2
205	0	25.6667	0	0	0	6.48	16.7652	0	36.4206	1	0	1	0	6.48	0	5.32611	0	0	0	0	6.24863	2	1	0.793472	6.42923	-7	0	0	0	0	0	0	1	0	0	0	-4.65711	0	1.16667	0	0	0	0	2	0	13.1212	0	0	2
206	0	15.5522	0	0	0	6.48	13.278	0	31.1782	0	0	1	0	6.48	0	5.19222	0	0	0	0	6.24863	2	2	0.483796	6.08163	0	0	0	0	0	0	0	1	0	0	0	-4.08865	0	0.777608	0	0	0	0	2	0	11.5632	0	0	2
207	0	17.6722	0	0	12.5705	58.36	13.403	0	45.2272	0	0	1	0	58.36	1	16.4491	0	1	0	0	79.1772	4	3	5.57053	7.14358	4.75	0	0	0	0	0	0	1	1	0	0	-4.52525	1	0.679699	1	0	0	3	3	2.04082	8.95385	0	0	4
208	0	28.0808	0	0	13.0165	33.2	26.8615	0	67.611	0	0	1	0	33.2	1	79.3373	0	1	0	0	134.815	10	2	6.01652	8.13113	-0.75	0	0	0	0	0	0	1	0	0	1	-6.7892	1	0.877526	1	0	0	4	2	2.12766	9.96774	1	0	9
209	0	31.636	0	0	11.5251	35.58	15.6751	0	46.3651	1	0	1	1	35.58	1	20.8634	0	1	0	0	49.4043	6	1	4.52512	7.68474	-9.25	0	0	0	0	0	0	1	0	0	0	-5.15326	1	1.1717	1	0	0	1	3	1.72414	9.36182	0	0	4
211	0	14.1926	0	0	0	54.38	6.26478	0	35.3158	0	0	1	1	54.38	0	14.5326	0	0	0	0	88.4795	4	2	3.05164	6.44937	3.25	0	0	0	0	0	9.05164	1	1	0	0	-3.69152	2	0.645118	3	0	0	4	2	5	9.88312	0	0	4
212	0	29.2278	0	0	0	24.94	14.4669	0	47.5249	0	0	1	1	24.94	0	12.4292	0	0	0	0	28.2484	5	2	1.91381	8.30064	-4.5	0	0	0	0	0	0	1	1	0	0	-5.29239	2	1.04385	4	0	0	1	2	3.38983	9.8254	0	0	4
213	0	29.938	0	0	0	41.93	21.9419	0	67.2717	0	0	1	1	41.93	0	42.109	0	0	0	0	97.7277	6	4	5.98953	10.1648	1.5	0	0	0	0	0	9.89973	1	1	0	1	-6.80713	3	0.855371	5	0	1	5	1	4.83871	13.3277	0	1	6
214	0	27.3421	0	0	0	33.29	13.3706	0	46.5178	2	0	1	1	33.29	0	13.3938	0	0	0	0	47.0214	3	2	2.10874	7.21012	-3	0	0	0	0	0	0	1	1	0	0	-4.68333	1	1.05162	2	0	0	5	2	1.72414	9.59385	0	0	3
215	0	31.1421	0	0	11.3446	52.65	9.35125	0	47.5011	1	0	1	1	61.03	2	28.1404	0	1	1	0	66.9666	8	1	4.34456	8.31856	-7.75	0	0	0	0	0	0	1	0	0	0	-4.69325	2	1.15341	0	0	0	2	3	3.57143	9.29345	0	0	5
216	0	19.8011	0	0	0	6.48	19.1122	0	36.8184	0	0	1	0	6.48	0	8.34829	0	0	0	0	6.24863	3	2	2.16082	6.68383	-1.25	0	0	0	0	0	0	1	0	0	0	-4.9821	0	0.900048	0	0	0	0	2	0	12.3853	0	0	2
217	0	31.1522	0	0	12.0698	41.57	21.1793	0	55.9255	1	0	1	1	41.57	1	46.4133	0	1	0	0	102.16	8	2	5.06976	7.5011	-5.25	0	0	0	0	0	0	1	1	0	1	-5.92523	2	1.00491	3	0	0	2	2	3.50877	10.3613	0	0	7
219	0	29.7257	0	0	11.1571	35.58	14.0201	0	44.1426	1	0	1	1	35.58	1	19.8983	0	1	0	0	49.4043	6	1	4.15706	7.6157	-8.75	0	0	0	0	0	0	1	0	0	0	-4.87817	1	1.1433	1	0	0	1	3	1.81818	9.2	0	0	4
221	0	24.0523	0	0	0	42.52	7.80103	0	48.5651	2	0	1	1	42.52	0	35.9252	0	0	0	0	102.902	7	2	4.49373	6.89157	-4.25	0	0	0	0	0	0	1	1	0	1	-4.71839	2	0.890824	4	0	1	5	2	4	9.79487	0	0	7
222	17.8282	12.5691	0	0	0	12.03	12.3053	1	25.3119	1	0	0	0	12.03	0	6.5237	0	0	0	0	18.0108	1	2	1.28833	6.84156	1.5	0	0	0	0	0	0	1	0	0	0	-3.89907	0	0.739358	0	0	0	0	1	0	12.8088	0	0	1
224	0	28.3864	0	0	0	41.93	21.0512	0	63.6126	0	0	1	1	41.93	0	30.3543	0	0	0	0	82.7675	5	4	5.50571	10.1648	2.25	0	0	0	0	0	9.91292	1	1	0	1	-6.6044	3	0.834895	5	0	1	5	1	4.83871	13.1604	0	1	5
225	0	25.5944	0	0	0	23.47	14.6424	0	35.7987	0	0	1	0	23.47	0	13.2491	0	0	0	0	45.8077	2	1	5.61135	6.25663	-7	0	0	1	0	0	11.6113	1	0	0	0	-4.37757	1	1.16338	1	0	0	2	1	1.88679	7.45887	0	0	2
227	0	23.0393	0	0	12.1701	23.55	18.2658	0	43.6887	0	0	1	1	23.55	1	25.8135	0	0	0	0	46.3537	5	2	5.17013	6.75859	-2.25	0	0	0	0	0	0	1	1	0	1	-5.03642	1	0.886128	1	0	0	2	2	2	9.47077	0	0	4
228	0	14.5041	0	0	0	16.13	9.84913	0	29.3408	0	0	1	0	16.13	0	8.14521	0	0	0	0	19.9098	3	1	1.85492	4.82509	0.5	0	0	0	0	0	0	1	0	0	0	-3.91186	0	0.763372	0	0	0	0	2	0	6.44444	0	0	2
229	0	16.9406	0	1	0	73.1	3.76362	0	27.8889	0	1	1	0	98.4	1	12.6888	0	0	0	2	100.652	7	0	2.54458	5.28678	-1.25	0	0	0	1	0	0	1	0	1	0	-2.9516	0	0.891612	0	4	0	0	5	0	6.65497	0	0	5
230	99.9769	8.41273	0	0	10.3179	120.73	0.00919697	2	24.898	0	0	1	0	120.73	5	32.8738	1	1	1	0	148.22	9	0	4.06078	4.50595	-0.5	0	1	0	1	4.77527	0	1	1	0	0	-1.5308	5	0.494866	4	1	0	3	4	21.7391	6.47059	0	0	8
231	134.71	50.6899	0	0	13.3851	160.83	0.0175762	2	96.2631	5	0	0	1	160.83	1	81.8535	0	0	1	0	252.194	13	2	6.38511	15.3475	-13.5	0	0	0	0	0	10.5666	0	1	0	0	-3.74701	13	1.2069	22	0	5	45	0	17.5676	17.3333	0	1	13
233	0	21.947	1	0	11.1665	93.81	0.241929	0	33.6618	4	0	1	0	93.81	2	28.4522	0	1	1	0	140.736	6	0	4.16655	4.60239	-9.25	0	0	0	0	0	9.16015	1	1	0	0	-1.44996	4	1.09735	6	0	3	5	2	8.69565	6.25263	0	0	6
234	0	25.9426	0	1	12.2821	83.56	9.66737	0	48.0634	0	0	1	1	83.56	3	22.3717	0	1	0	1	111.523	7	0	5.28209	7.88741	-1.25	0	0	0	1	0	0	1	1	1	0	-4.36637	1	0.926521	1	3	0	2	5	1.92308	9.80423	0	0	6
235	115.13	41.4953	2	0	11.2015	219.93	0.190256	1	76.5605	0	4	1	1	321.13	7	75.374	0	1	1	0	325.867	19	0	6.18236	14.9693	-9	0	0	0	0	0	9.11277	1	1	0	0	-2.41871	8	1.15265	9	3	3	11	7	15.0943	10.219	0	0	14
237	102.995	23.4755	0	0	12.7432	117.51	4.95891	2	51.9387	0	0	1	1	117.51	1	40.4411	1	1	0	0	176.538	10	1	5.74323	9.29155	-3.75	0	0	1	0	5.08092	9.2615	1	1	0	0	-3.36934	4	0.869463	4	2	0	4	5	9.30233	12.6154	1	0	8
239	109.228	25.4361	0	0	12.7874	117.51	6.04769	2	54.5725	0	0	1	1	117.51	1	41.012	1	1	0	0	176.538	10	1	5.78736	9.75343	-4.25	0	0	0	0	5.26217	9.54275	1	1	0	0	-3.4388	4	0.908433	4	2	0	4	5	8.69565	12.6402	1	0	8
240	37.9405	10.5606	1	0	10.6579	66.84	0.153811	1	17.8021	1	1	0	0	92.14	2	23.5993	0	1	1	0	107.097	6	0	4.18722	4.03868	-5.5	0	0	0	1	0	8.73799	0	0	0	0	-1.19256	4	0.812353	5	0	4	2	1	16.6667	4.83333	0	0	5
241	0	16.0474	0	0	12.2807	118.22	1.73996	0	39.0023	1	0	0	1	118.22	1	47.5386	0	0	0	0	238.562	6	2	5.28074	7.13196	2	0	0	0	0	0	9.34497	0	1	0	0	-3.05792	6	0.729427	6	0	1	11	0	16.6667	9.57576	0	4	6
242	0	11.5815	1	0	10.8435	37.3	15.1743	0	27.9534	0	0	0	1	37.3	1	25.4007	0	0	1	0	82.7884	3	2	5.96664	4.29207	3.25	0	0	0	0	0	8.89021	0	1	0	0	-4.07597	2	0.643415	2	0	0	2	0	6.45161	6.66667	0	0	3
243	0	10.5186	0	0	0	121.38	6.23454	0	17.035	4	0	0	0	121.38	0	32.3538	0	0	0	0	256.1	6	0	2.95662	1.77999	-7	0	0	0	0	0	8.34332	0	0	0	0	1.44001	6	0.876548	6	0	3	2	0	23.0769	3.12121	0	0	6
244	53.0198	12.3642	0	1	11.0161	106.39	2.38136	1	29.2301	0	1	1	1	134.63	2	18.0426	0	1	0	0	142.521	7	1	4.01614	5.85721	1.75	0	0	0	1	0	0	1	0	0	0	-2.55867	1	0.650745	1	4	0	2	5	3.125	7.07018	0	0	6
245	0	28.5196	1	0	10.6199	113.29	9.62738	0	56.6906	0	0	0	1	113.29	2	47.3376	0	0	1	0	200.34	7	2	5.08174	7.58542	-1.25	0	0	0	0	0	8.71353	0	1	0	0	-4.36673	7	0.919986	9	0	1	12	0	11.4754	9.70753	0	2	7
246	0	25.5151	0	0	11.3054	85.97	14.3362	0	53.339	0	0	0	1	85.97	3	38.9688	0	0	1	0	125.973	6	2	5.08941	8.26469	0.25	0	0	0	0	0	10.0858	0	1	0	0	-4.81398	6	0.850504	9	0	1	9	0	10.7143	11.0897	0	1	6
247	0	25.7284	2	0	10.6729	210.54	1.71944	0	64.9767	1	0	1	1	210.54	3	54.3135	0	1	1	0	314.873	13	1	5.37039	8.92726	-0.5	0	0	0	0	0	8.72404	1	1	0	0	-2.5229	5	0.77965	5	5	2	7	8	9.09091	10.5644	0	0	13
248	0	25.7284	2	0	10.6729	210.54	1.71944	0	64.9767	1	0	1	1	210.54	3	54.3135	0	1	1	0	314.873	13	1	5.37039	8.92726	-0.5	0	0	0	0	0	8.72404	1	1	0	0	-2.5229	5	0.77965	5	5	2	7	8	9.09091	10.5644	0	0	13
249	38.6924	11.0626	0	0	11.4514	90.37	0.110128	1	21.0454	1	0	1	0	90.37	3	22.5661	0	1	0	0	131.635	6	0	4.45139	4.26242	-6	0	0	0	1	0	8.89611	1	0	0	0	-0.91329	3	0.737506	4	2	0	3	3	10.7143	6.27619	0	0	6
250	0	14.2581	0	0	10.721	84.58	1.13882	0	27.1541	1	0	1	0	84.58	1	21.3872	0	1	0	0	129.736	5	1	3.72097	3.86534	-2.75	0	0	0	0	0	9.55715	1	1	0	0	-1.53304	3	0.792117	4	0	0	4	2	7.89474	6.05882	0	0	5
251	0	66.6339	1	0	12.2304	74.6	25.6279	0	81.5875	1	0	0	1	74.6	3	46.5712	0	0	1	0	135.657	4	0	7.20235	12.502	-15.5	0	0	0	0	0	10.049	0	1	0	0	-6.70341	4	1.95982	4	0	0	17	0	5	18.7754	0	0	4
252	105.034	22.4064	0	0	11.509	89.75	4.51669	2	40.341	0	0	1	1	89.75	3	35.6003	1	1	0	0	98.4689	7	0	5.59969	7.47919	-6.75	0	1	0	1	0	0	1	1	0	0	-2.91334	3	0.974191	3	3	0	6	4	6.66667	8.90909	0	0	6
253	105.034	22.4064	0	0	11.509	89.75	4.51669	2	40.341	0	0	1	1	89.75	3	35.6003	1	1	0	0	98.4689	7	0	5.59969	7.47919	-6.75	0	1	0	1	0	0	1	1	0	0	-2.91334	3	0.974191	3	3	0	6	4	6.66667	8.90909	0	0	6
255	72.6981	22.8394	0	0	0	73.06	11.7048	1	48.5234	2	0	1	1	73.06	0	30.4099	1	1	0	0	119	7	1	5.37086	8.2157	-1.75	0	0	0	0	0	9.84016	1	1	0	1	-4.58667	2	0.845904	3	2	0	5	4	4.16667	9.35043	0	0	6
258	96.7633	22.7146	0	0	12.7322	97.28	8.79638	2	49.4026	0	0	1	1	97.28	1	34.3152	1	1	0	0	133.854	9	1	5.73215	9.07967	-3	0	0	1	0	5.14967	10.0313	1	1	0	0	-3.99631	3	0.873637	3	2	0	3	5	7.14286	12.56	1	0	7
259	108.459	28.2704	0	1	12.4684	74.16	13.6827	1	56.4811	0	1	1	1	99.46	3	21.9049	2	1	0	0	90.5836	7	2	5.46836	9.66794	-2	0	0	0	1	5.81794	0	1	1	0	0	-4.71879	2	0.88345	3	3	0	3	4	3.33333	11.8427	0	0	6
260	53.0987	19.7734	1	0	11.2656	68.53	11.0059	1	46.079	0	0	0	1	68.53	2	33.9879	2	1	1	0	103.973	6	2	5.9872	7.8211	1.75	0	0	0	0	0	9.23265	1	1	0	0	-4.68306	4	0.790936	5	0	0	11	1	9.7561	9.41	0	0	4
261	0	22.6552	0	1	12.2882	92.79	4.09423	0	47.6671	0	0	1	1	92.79	3	24.334	0	1	0	0	122.523	7	0	5.28823	7.60295	-1.25	0	0	0	1	0	0	1	1	0	0	-3.10434	2	0.809115	3	3	0	4	5	3.77358	10.0212	0	0	7
262	97.808	31.2487	0	0	12.6344	106.51	10.6779	1	62.7944	0	1	1	1	134.75	1	36.8916	1	1	0	0	160.455	12	1	5.63444	11.3866	-4	0	0	0	0	0	9.12261	1	1	0	0	-5.04336	2	0.94693	2	4	0	2	7	3.57143	10.9735	0	0	9
263	0	19.965	0	0	11.1418	91.54	9.98311	0	48.2802	0	0	1	1	91.54	3	39.2601	0	1	0	0	119.025	9	2	4.88533	9.23614	3.25	0	1	0	1	0	0	1	1	0	0	-5.08405	2	0.767886	2	1	0	3	4	5.71429	8.29846	0	0	6
266	53.0987	21.2972	1	0	11.2997	66.84	10.6873	1	46.079	1	0	0	1	66.84	2	34.2567	0	1	1	0	107.097	6	2	6.02137	7.8211	0.25	0	0	0	0	0	9.26682	1	1	0	0	-4.45505	4	0.851889	5	0	0	11	1	9.30233	9.41	1	0	5
270	76.973	18.8107	0	1	10.2486	98.62	2.35345	1	34.6684	0	1	1	1	123.92	3	20.4418	1	0	1	0	116.186	9	0	3.24859	4.99402	-6	0	0	0	1	5.4789	0	1	1	0	0	-2.13118	3	0.855034	2	4	0	5	5	6.66667	7.0303	0	0	7
271	72.5097	17.9475	0	0	10.3848	86.59	1.133	1	32.7157	0	1	1	1	111.89	3	20.683	2	0	1	0	98.1749	8	0	3.38483	5.02771	-5	0	0	0	0	5.69998	0	1	1	0	0	-2.19735	3	0.854641	2	1	0	2	4	6.97674	6.77619	0	0	6
272	72.5097	18.0665	0	0	10.3493	86.26	0.433524	1	32.7157	0	1	1	1	111.56	3	19.3269	2	0	1	0	99.4001	8	0	3.34927	5.02771	-5.5	0	0	0	0	5.69998	0	1	1	0	0	-1.98299	3	0.860308	2	1	0	2	4	6.97674	6.77619	0	0	6
274	265.177	103.204	0	0	11.9442	203.06	0.915226	2	136.95	11	0	0	1	203.06	2	107.556	0	0	1	0	358.244	14	0	6.5684	19.8272	-33.25	0	0	1	0	0	9.98754	0	1	0	0	-5.23726	14	1.87644	21	0	7	38	0	11.7647	18.8	0	0	14
275	164.095	40.5261	0	0	12.0834	59.39	12.7298	2	69.2932	2	0	1	1	59.39	1	24.4451	1	1	0	0	74.0654	6	2	5.08336	11.3222	-6.75	0	0	0	0	0	0	1	1	0	0	-5.55071	2	1.15789	3	1	0	6	4	2.73973	12.6168	0	0	5
276	41.6924	12.9169	0	0	11.4277	90.37	0.196353	1	23.7278	0	1	1	0	115.67	3	31.4003	0	1	0	0	146.595	8	0	5.1327	4.92129	-6.75	0	0	0	1	0	8.8558	1	0	0	0	-1.2752	3	0.807309	4	2	0	3	3	11.5385	6.35833	0	0	7
277	43.0722	9.38075	0	1	0	103.31	2.00622	1	22.7036	0	1	1	0	131.55	1	12.7741	0	0	0	0	132.263	6	1	1.69155	5.12493	2.25	0	0	0	1	0	0	1	0	0	0	-2.36286	0	0.586297	0	4	0	0	5	0	6.475	0	0	5
278	197.027	37.0666	0	0	13.0721	77.32	9.82799	2	72.403	0	1	1	1	113.94	2	36.1934	1	1	1	0	90.4025	9	1	6.07206	13.1084	-1.25	0	0	0	0	0	0	1	1	0	0	-6.08783	3	1.02963	2	1	0	3	4	4.41176	11.646	0	0	6
280	134.633	15.3167	0	0	10.7492	90.02	1.88255	2	32.5449	0	1	1	1	115.32	2	21.0938	1	0	1	0	81.3893	8	0	3.74922	6.05913	-2	0	0	0	0	5.67118	0	1	1	0	0	-2.85769	3	0.729367	2	1	0	3	4	7.69231	7.68571	0	0	5
281	71.1929	20.7311	0	0	11.4548	101.73	0.19127	1	40.595	1	0	1	1	110.11	3	35.7141	0	1	1	0	132.884	8	1	5.41002	6.4837	-3.5	0	0	0	0	0	0	1	1	0	0	-2.02513	4	0.901351	3	0	0	4	3	8.69565	7.6166	0	0	7
282	241.291	65.0231	0	0	13.6199	118.21	9.38013	3	104.044	3	0	1	1	118.21	4	66.2915	1	1	1	1	156.502	11	1	7.43311	17.3788	-15.25	0	0	0	0	0	12.1477	1	1	1	0	-5.93266	5	1.51217	6	0	4	18	5	6.0241	17	0	0	9
283	241.291	65.0231	0	0	13.6199	118.21	9.38013	3	104.044	3	0	1	1	118.21	4	66.2915	1	1	1	1	156.502	11	1	7.43311	17.3788	-15.25	0	0	0	0	0	12.1477	1	1	1	0	-5.93266	5	1.51217	6	0	4	18	5	6.0241	17	0	0	9
285	100.999	26.2515	0	1	12.2868	87.05	3.3527	1	49.7855	0	1	1	1	112.35	3	22.6204	2	1	0	0	107.369	8	0	5.28685	8.0481	-4.5	0	0	0	1	5.79633	0	1	1	0	0	-3.2505	2	0.905222	3	3	0	2	5	3.57143	9.85961	0	0	7
286	75.3797	39.2904	0	0	13.588	42.68	26.0662	1	60.0766	0	0	1	1	42.68	1	25.6816	2	0	0	0	48.7765	6	2	6.58803	11.9675	-2.5	0	0	0	0	6.0709	0	1	1	0	0	-7.4736	3	1.26743	5	0	0	5	1	5	10.4903	0	0	4
287	100.58	28.2016	0	1	12.2847	109.83	3.3527	1	51.1656	0	1	1	1	135.13	3	26.1918	2	1	0	0	137.142	8	0	5.2847	7.85037	-4	0	0	0	1	5.76661	0	1	1	0	0	-3.29197	2	0.972469	3	3	0	2	5	3.57143	9.73645	0	0	7
288	102.798	17.0742	0	0	11.0749	57.36	1.18885	2	32.8482	1	0	1	1	57.36	1	15.1305	1	1	1	0	57.2799	5	1	4.07486	6.06739	-4.5	0	0	0	1	0	0	1	1	0	0	-2.5983	2	0.813057	3	0	0	4	3	4.7619	8.9619	0	0	4
289	228.03	102.602	0	0	13.002	171.17	5.40102	3	179.579	3	0	1	1	171.17	5	106.53	2	1	1	0	239.319	14	2	8.32199	23.5432	-18.25	0	0	2	0	0	11.9702	1	1	0	0	-6.26732	10	1.71003	14	0	4	50	4	8.62069	22.4633	0	0	13
290	0	37.0513	0	0	12.8687	53.09	13.6743	0	67.0846	0	0	1	1	53.09	2	30.4194	0	1	0	0	70.6627	6	2	5.95591	9.78189	-6.25	0	0	0	0	0	0	1	1	0	0	-5.27101	3	1.05861	4	0	1	9	3	4.05405	10.8504	1	0	6
291	0	26.8854	1	0	11.3283	88.52	13.9795	0	66.4707	1	0	1	1	88.52	2	37.6379	0	1	1	0	138.769	6	3	6.68402	9.97636	5.25	0	0	0	0	0	9.26522	1	1	0	0	-5.46193	4	0.814708	5	0	0	16	2	7.01754	11.6667	0	0	6
292	0	25.5198	0	0	11.9881	82.81	0.994789	0	38.1882	4	0	1	1	82.81	2	27.9386	0	1	1	0	109.053	6	0	4.98807	5.21372	-10.5	0	0	0	0	0	0	1	1	0	0	-1.78471	4	1.15999	7	0	3	6	2	7.69231	6.49784	0	0	6
293	0	18.9432	0	0	11.1221	99.61	3.65472	0	34.6689	2	0	1	1	99.61	1	22.0485	0	1	1	0	151.055	8	0	4.1221	4.61569	-4.75	0	0	0	1	0	9.51982	1	1	0	0	-2.31579	3	0.902059	4	2	0	3	5	6.81818	6.21905	0	0	8
294	56.1608	20.5068	0	0	12.0728	72.5	7.23061	1	51.9943	0	0	1	1	72.5	4	26.9814	1	1	0	0	89.742	7	1	5.22649	8.50767	1.75	0	0	0	0	0	0	1	1	0	0	-3.8843	2	0.732385	2	0	1	6	5	4.25532	11.0873	0	0	6
295	0	16.3718	0	0	10.7582	101.22	3.4646	0	37.8543	0	0	1	1	101.22	5	37.6324	0	0	1	0	130.047	7	1	5.05539	6.23275	0.25	0	0	0	0	0	0	1	1	0	0	-3.04863	5	0.744173	4	0	0	4	2	13.1579	7.48918	0	0	6
296	0	7.7036	0	0	0	52.02	2.83431	0	20.8005	0	0	1	0	52.02	0	9.02461	0	1	0	0	60.5601	4	1	1.70103	4.17448	2.5	0	0	0	0	0	0	1	0	0	0	-2.37181	1	0.513573	2	0	0	1	3	3.7037	6.64762	0	0	3
298	76.7397	19.4601	0	0	11.3432	77.98	10.1284	1	49.3009	0	0	1	1	86.36	2	51.518	1	1	1	0	137.148	9	2	5.12548	7.10285	3	0	0	0	0	0	0	1	1	0	0	-4.89752	2	0.748464	0	0	0	0	3	5	8.22154	0	0	7
300	0	20.1944	1	0	10.456	71.78	10.8502	0	46.3605	0	0	1	1	71.78	2	49.0643	0	0	1	0	160.113	8	1	4.95892	5.5747	-1	0	0	0	0	0	8.58008	1	1	0	1	-4.22611	3	0.776709	3	0	0	3	2	6.97674	7.77538	0	0	8
301	0	37.7457	0	0	12.3617	73.4	8.88978	0	72.5448	2	0	1	1	73.4	3	41.4103	0	1	0	0	98.9319	8	2	6.02289	11.2929	-8.25	0	0	0	0	0	0	1	1	0	0	-4.72426	4	0.993309	5	0	1	10	4	5.40541	11.4154	2	0	8
302	65.4095	15.8368	0	0	0	61.8	13.3352	1	42.8227	0	0	1	1	61.8	0	19.0571	1	0	0	0	76.2544	5	2	3.96678	7.91127	6.5	0	0	0	0	0	9.96678	1	1	0	0	-5.19965	1	0.633471	1	1	0	2	3	2.5641	8.93667	0	1	3
303	0	23.8239	0	0	0	81.95	1.84374	0	37.573	3	0	1	1	81.95	0	29.3212	0	0	0	0	157.061	5	1	3.99506	5.18504	-6.75	0	0	0	0	0	9.74058	1	1	0	0	-2.14241	4	1.0829	5	0	1	9	1	8.16327	9.00433	0	0	5
304	0	54.8978	0	0	13.3329	101.9	12.3168	0	88.6858	3	1	1	1	127.2	2	47.9327	0	1	0	0	174.802	8	2	6.46093	12.1194	-8.25	0	0	0	0	0	10.139	1	1	0	0	-5.72888	4	1.37245	4	0	2	11	3	4.70588	11.9564	0	1	7
305	34.2201	11.9238	1	0	11.0425	86.99	0.526821	1	30.8619	0	0	0	0	86.99	3	34.1802	0	0	1	0	131.93	7	1	5.09183	6.33483	-1.25	0	0	0	0	0	9.01369	1	0	0	0	-2.11513	6	0.627568	8	0	5	13	1	21.4286	10.7719	0	0	7
306	84.542	21.5731	0	0	12.4005	106.95	1.54059	1	50.7153	0	0	1	1	106.95	1	32.0782	1	1	0	0	129.369	9	1	5.40053	8.99111	-2.5	0	0	0	0	5.19648	0	1	1	0	0	-3.34953	4	0.770469	7	4	0	2	5	8.16327	10.4841	1	0	9
307	0	30.7493	0	0	12.0973	113.6	6.34989	0	63.493	1	0	1	1	121.98	4	51.1581	0	1	1	0	158.029	10	2	5.4921	10.2741	-2	0	0	0	1	0	0	1	1	0	0	-4.74224	5	0.931796	4	1	0	12	3	8.19672	10.072	0	0	8
308	37.4146	34.3557	0	0	11.7862	91.67	2.07931	1	52.4583	0	0	0	1	91.67	5	49.7921	0	0	0	0	160.801	5	0	6.28574	9.71611	-8.25	0	0	1	0	0	9.3407	0	1	0	0	-2.98076	5	1.32137	5	0	1	10	0	9.61538	14.3908	0	0	5
311	187.48	29.2172	0	0	0	86.63	12.4613	2	66.9934	0	0	1	1	86.63	1	23.2974	1	1	0	0	107.164	7	2	3.22335	10.9759	1	0	0	0	0	0	9.22335	1	1	0	0	-5.00182	2	0.834778	3	1	0	2	5	3.125	11.5126	0	0	6
312	0	10.1421	0	0	12.0164	107.2	2.26638	0	30.1299	0	0	1	1	115.58	2	28.4519	0	1	1	0	137.941	8	1	5.01639	5.82757	4.5	0	0	0	0	0	0	1	1	0	0	-2.47363	3	0.533794	2	1	0	2	4	9.67742	6.67836	0	0	7
313	0	45.9821	0	0	12.5999	206.07	0.666314	0	92.9806	4	0	1	1	206.07	3	101.853	0	0	1	0	354.748	12	2	6.64306	13.7952	-7.25	0	0	1	0	0	9.516	1	1	0	0	-2.74106	11	1.17903	14	0	9	30	1	16.1765	16.6964	0	2	12
315	51.7253	20.5332	0	0	0	83.09	1.44794	1	41.7065	0	1	1	1	83.09	0	25.3509	1	0	0	0	79.6567	7	1	5.68026	8.23901	-0.75	0	0	0	0	0	0	1	1	0	0	-3.50116	3	0.855551	4	1	0	4	3	6.97674	9.27536	0	0	5
316	68.1379	15.8815	0	2	0	135	0.509086	1	30.0248	0	2	1	0	188.54	2	17.4127	0	0	0	0	183.232	10	0	2.45969	5.63849	-2.75	0	0	0	2	0	0	1	0	0	0	-1.59335	0	0.794073	0	8	0	0	8	0	6.63158	0	0	8
318	0	28.8352	0	0	11.8384	83.09	1.87094	0	59.4374	1	0	1	1	83.09	5	37.8805	0	1	0	0	112.3	7	1	5.64214	9.23166	-3.5	0	0	0	0	0	0	1	1	0	0	-3.34294	6	0.994317	10	0	0	20	1	11.1111	13.5813	0	0	7
320	0	8.41069	1	0	10.4186	103.78	4.11097	0	20.0654	1	0	0	0	103.78	1	26.6894	0	0	1	0	186.092	5	1	3.41862	2.67108	0.25	0	0	0	0	0	8.53032	1	0	0	0	-0.743428	4	0.600764	4	0	0	6	1	16	5.15385	0	2	5
322	45.5924	13.8481	0	0	11.5839	110.6	0.0153501	1	25.749	1	0	1	0	110.6	3	29.5657	0	1	0	0	174.319	7	0	4.58389	4.99757	-7.25	0	0	0	1	0	9.08653	1	0	0	0	-0.498844	4	0.814593	5	2	1	6	3	12.5	6.47794	0	0	7
323	0	7.00204	1	0	10.1574	63.6	0.0148601	0	16.9269	0	0	0	0	63.6	4	21.8803	0	0	1	0	103.973	4	0	4.05338	1.90293	-0.75	0	0	0	0	0	8.30739	0	0	0	0	-1.01928	4	0.583503	5	0	2	4	0	18.1818	3.13636	0	0	4
325	45.5924	13.8481	0	0	11.5839	110.6	0.0153501	1	25.749	1	0	1	0	110.6	3	29.5657	0	1	0	0	174.319	7	0	4.58389	4.99757	-7.25	0	0	0	1	0	9.08653	1	0	0	0	-0.498844	4	0.814593	5	2	1	6	3	12.5	6.47794	0	0	7
326	75.041	22.6928	0	0	12.2224	63.04	6.94658	1	44.4019	0	1	1	1	91.28	3	32.8439	1	0	1	0	79.3005	8	1	5.23065	9.36172	-2.25	0	0	0	0	0	0	1	1	0	0	-4.30694	3	0.907713	4	0	2	7	2	7.5	9.91	0	0	4
327	0	8.41069	1	0	10.4186	103.78	4.11097	0	20.0654	1	0	0	0	103.78	1	26.6894	0	0	1	0	186.092	5	1	3.41862	2.67108	0.25	0	0	0	0	0	8.53032	1	0	0	0	-0.743428	4	0.600764	4	0	0	6	1	16	5.15385	0	2	5
328	0	24.2811	1	0	11.422	75.01	1.31408	0	49.5715	1	0	1	1	75.01	3	45.6531	0	0	1	0	128.306	8	1	6.98365	8.51257	-6.25	0	0	0	0	0	9.32005	1	1	0	0	-3.063	4	0.933887	5	0	1	11	3	8.69565	12.1662	0	0	8
330	192.207	24.8328	0	0	11.571	90.02	7.77617	2	50.7493	0	1	1	1	115.32	2	25.413	2	0	1	0	81.3893	8	1	4.57096	8.5953	-1	0	0	0	0	5.79142	0	1	1	0	0	-4.43722	3	0.856302	2	1	0	6	4	5.45455	9.66502	0	0	5
331	181.705	22.4112	0	0	11.5603	90.02	8.0292	2	48.7417	0	1	1	1	115.32	2	25.153	1	0	1	0	81.3893	8	1	4.56026	8.50691	0	0	0	0	0	5.75668	0	1	1	0	0	-4.39823	3	0.800399	2	1	0	7	4	5.76923	9.35979	0	0	5
332	167.829	22.5266	0	0	0	44.2	7.51492	2	41.8101	0	1	1	1	69.5	0	10.6364	2	0	0	0	30.6424	5	1	2.34334	7.50088	-1.75	0	0	0	0	5.84334	0	1	1	0	0	-4.20555	1	0.866406	2	1	0	0	3	1.88679	9.78462	0	0	3
334	52.4019	15.2899	0	0	11.2862	134.63	0.324337	1	30.6812	2	0	1	0	134.63	5	33.0124	0	1	0	0	173.321	9	0	4.71262	5.37731	-6.25	0	1	0	1	0	9.16267	1	0	0	0	-0.765851	4	0.80473	5	2	0	4	5	12.1212	6.74854	0	0	8
337	0	24.0464	0	0	0	42.35	10.3875	0	41.1669	1	0	1	1	42.35	1	19.2585	0	0	0	0	70.4688	3	1	5.19352	8.16095	-3.25	0	0	0	0	0	11.1935	1	1	0	0	-4.48589	2	1.00193	3	0	0	4	1	4.08163	10.6159	0	0	3
339	0	8.72188	0	1	0	50.41	4.41137	0	17.7268	1	0	0	0	50.41	1	10.3351	0	0	0	0	67.6935	4	1	1.92356	4.65925	-0.5	0	0	0	1	0	0	1	0	0	0	-2.9054	0	0.670914	0	3	0	0	3	0	7.89744	0	0	3
340	0	49.508	0	0	11.9698	74.22	2.57711	0	64.1287	1	0	1	1	84.03	1	32.1841	0	0	1	0	93.2381	8	0	4.96983	6.34778	-19	0	0	0	0	0	9.79109	0	1	0	0	-3.79518	6	1.41451	6	0	3	16	1	6.38298	10.3933	0	0	6
341	531.746	54.1802	0	0	12.8112	104.7	26.2902	3	107.383	2	1	1	1	130	2	42.294	0	1	1	0	120.508	14	3	5.81118	16.8303	-6.75	0	0	0	1	0	0	1	1	0	0	-7.46221	4	1.0836	7	4	0	13	8	4.3956	14.0261	0	0	11
342	0	31.2713	0	0	12.7526	76.88	7.49338	0	62.7665	2	0	1	1	76.88	2	35.6285	0	1	0	0	101.722	7	2	5.8115	10.0722	-3.5	0	0	0	0	0	0	1	1	0	0	-4.57465	3	0.919744	4	0	1	9	4	4.6875	10.7184	1	0	7
343	45.2242	22.1611	0	0	12.7409	50.16	5.04066	1	38.4156	3	0	1	0	50.16	1	17.3537	1	1	0	0	62.943	5	1	5.74087	7.92297	-5.75	0	0	0	0	0	0	1	0	0	0	-3.49149	1	0.963527	1	0	0	3	4	2.12766	10.5336	0	0	4
344	0	34.9219	0	0	12.6845	111.96	12.3214	0	57.6903	0	0	1	1	111.96	1	32.0591	0	1	0	0	154.807	8	0	5.68451	8.76104	-9	0	0	0	0	0	0	1	1	0	0	-4.15481	2	1.12651	3	2	0	4	6	3.07692	9.77634	0	0	8
345	70.3036	32.71	0	0	12.9566	84.39	8.14659	1	57.3805	1	0	1	1	84.39	3	40.6876	1	1	0	0	135.153	8	1	5.95655	10.1572	-8.5	0	0	0	0	5.32918	9.93104	1	1	0	1	-4.27128	3	1.05516	3	1	1	4	4	5.17241	12.8538	0	0	8
346	93.3254	12.8065	0	0	10.7867	143.72	1.64308	2	26.2597	3	0	1	0	143.72	1	35.6501	0	1	0	0	230.541	9	0	3.7867	4.80539	-6.5	0	0	0	0	0	8.89682	1	0	0	0	0.294936	5	0.753324	6	2	1	4	4	17.2414	6.125	0	0	8
348	63.3242	15.945	0	0	10.7211	86.53	4.7439	1	30.1728	0	1	1	1	111.83	2	20.5418	0	0	1	1	85.5432	8	0	3.72109	6.31238	0.75	0	0	0	0	0	0	1	1	1	0	-3.70449	2	0.797248	0	1	0	2	4	6.06061	7.89474	0	0	4
350	0	11.5463	1	0	10.9668	72.19	1.72901	0	27.0608	0	0	0	0	72.19	3	26.2513	0	0	1	0	112.883	5	0	4.91519	5.04838	0	0	0	0	0	0	8.96593	1	0	0	0	-2.27414	3	0.679194	3	1	0	6	2	10.3448	8.22059	0	0	5
351	60.1992	12.4236	0	0	10.6888	86.53	2.26645	1	27.4447	0	1	1	1	111.83	2	18.8964	0	0	1	0	85.5432	7	0	3.68882	5.31513	1.25	0	0	0	0	0	0	1	1	0	0	-2.73724	2	0.653874	0	1	0	2	4	6.06061	7.60819	0	0	4
353	37.0637	9.25051	0	1	0	36.42	5.72067	1	18.5384	0	0	1	0	36.42	1	8.96953	0	0	0	0	52.807	4	1	1.95156	4.10503	-1.25	0	0	0	1	0	0	1	0	0	0	-2.9562	0	0.660751	0	3	0	0	3	0	6.18681	0	0	3
354	513.322	52.2427	0	0	12.8015	104.7	26.2902	3	105.227	2	0	1	1	104.7	2	46.7624	0	1	1	0	120.631	14	3	5.80152	16.8953	-7	0	0	0	1	0	0	1	1	0	0	-7.49618	4	1.06618	7	4	0	9	8	4.5977	13.8529	0	0	11
355	0	33.6843	0	0	0	72.74	9.17164	0	62.7256	0	0	1	1	72.74	0	26.0711	0	0	0	0	93.0697	6	2	4.1694	8.68851	-2.25	0	0	0	0	0	0	1	1	0	0	-4.49905	4	1.05264	8	0	0	7	2	5.88235	8.86895	0	0	6
357	237.27	40.4384	0	0	12.2254	70.89	15.8736	2	76.8113	0	0	1	1	70.89	3	31.725	0	1	0	0	93.6014	7	2	6.70581	11.6555	-3.75	0	0	0	0	0	0	1	1	0	0	-5.64025	2	1.06417	2	0	0	4	5	2.66667	10.9218	0	0	7
358	179.727	30.5087	0	0	13.1956	55.56	15.7647	2	61.372	0	0	1	1	55.56	1	23.5857	0	1	0	0	72.1663	4	3	6.1956	10.944	0.25	0	0	0	0	0	0	1	1	0	0	-5.01971	2	0.953396	3	0	0	4	2	3.22581	10.1754	0	0	4
359	179.727	30.5087	0	0	13.1956	55.56	15.7647	2	61.372	0	0	1	1	55.56	1	23.5857	0	1	0	0	72.1663	4	3	6.1956	10.944	0.25	0	0	0	0	0	0	1	1	0	0	-5.01971	2	0.953396	3	0	0	4	2	3.22581	10.1754	0	0	4
360	44.9924	13.9207	0	0	11.168	84.32	0.141648	1	26.4759	2	0	0	0	84.32	3	37.2283	0	1	0	0	140.068	7	0	5.36335	4.41781	-7.25	0	1	0	1	0	8.85893	1	0	0	0	-1.31165	4	0.818864	5	1	0	4	2	13.3333	6.44118	0	0	7
361	0	2.946	0	0	0	49.87	0.14918	0	4.4325	0	1	0	0	75.17	1	4.64352	0	0	0	0	64.5692	3	0	1.4838	0	-1	0	0	0	1	0	0	0	0	0	0	-0.552653	0	0.589199	0	1	0	0	2	0	1.8	0	0	2
362	117.385	31.0888	0	0	12.5656	53.09	11.3632	1	61.9416	1	0	1	1	53.09	2	50.7853	0	1	0	0	100.583	8	2	5.94221	9.07963	-5.75	0	0	0	0	0	0	1	1	0	1	-4.69932	3	0.942086	4	0	1	9	3	4.83871	10.589	1	0	8
364	235.696	62.1348	0	0	13.5888	97.98	8.88948	3	98.3886	3	0	1	1	97.98	4	55.386	1	1	0	1	113.818	10	1	7.38791	16.7057	-14.5	0	0	0	0	0	0	1	1	1	0	-5.93157	4	1.4794	5	0	3	15	5	4.87805	16.993	0	0	8
365	0	12.8587	0	0	11.8058	66.56	4.00923	0	31.0502	1	0	0	0	66.56	1	21.2636	0	1	0	0	103.85	4	2	4.80579	6.36695	2	0	0	0	1	0	10.3089	1	0	0	0	-3.33188	2	0.676776	2	1	0	3	2	6.06061	11.9474	0	0	4
366	0	45.1536	0	0	11.9818	131.27	9.81961	0	81.8253	1	2	1	1	181.87	5	53.9818	0	1	1	0	174.038	13	1	5.7433	12.9096	-4.25	0	0	0	0	0	0	1	1	0	0	-5.55192	4	1.18825	5	2	2	10	5	6.15385	10.7681	0	0	9
367	128.637	37.832	0	0	12.5743	131.19	1.2555	1	73.5428	3	0	1	1	139.57	3	58.3771	0	1	1	0	186.567	10	2	6.39596	10.2279	-4.75	0	0	0	1	0	11.1966	1	1	0	0	-3.51925	6	1.08091	6	0	5	14	3	8.57143	8.13613	0	0	9
368	128.637	37.832	0	0	12.5743	131.19	1.2555	1	73.5428	3	0	1	1	139.57	3	58.3771	0	1	1	0	186.567	10	2	6.39596	10.2279	-4.75	0	0	0	1	0	11.1966	1	1	0	0	-3.51925	6	1.08091	6	0	5	14	3	8.57143	8.13613	0	0	9
370	95.79	32.42	0	0	12.3034	43.86	17.1635	1	58.5499	0	0	1	1	43.86	2	35.8144	0	1	0	1	74.6229	7	2	6.10879	9.42437	-4.5	0	0	0	0	0	0	1	1	1	1	-5.4222	2	1.04581	2	1	0	5	3	3.44828	10.2323	0	0	6
371	0	15.4942	0	0	10.8576	70.59	1.42258	0	29.0127	2	0	1	1	70.59	1	20.7163	0	1	0	0	114.85	5	1	3.85762	3.70494	-3	0	0	0	0	0	9.68842	1	1	0	0	-1.84433	3	0.815486	4	0	0	6	2	7.31707	6.32749	0	0	5
372	0	10.4401	1	0	10.2945	63.32	1.49889	0	14.3443	0	0	0	0	63.32	1	14.6415	0	0	1	0	100.725	3	0	3.29454	1.76289	-4.25	0	0	0	0	0	8.47234	1	0	0	0	-1.24238	2	0.949096	2	0	0	4	1	7.14286	3.12727	0	0	3
373	46.9571	20.0789	0	0	12.2844	35.58	7.27294	1	40.1021	0	0	1	0	35.58	4	14.8464	0	1	0	0	49.4043	4	1	5.28442	6.4536	-2.75	0	0	0	0	0	0	1	1	0	0	-3.43945	1	0.872995	1	1	0	4	3	2.17391	9.4585	0	0	4
374	0	21.4966	0	0	12.1796	58.2	12.6493	0	43.6782	1	0	1	0	58.2	2	23.0664	0	1	0	0	86.3114	4	2	5.30131	6.68375	-1	0	0	0	0	0	0	1	1	0	0	-4.22451	2	0.826793	2	0	0	4	2	4	8.44923	0	0	4
375	37.7857	7.96618	0	0	10.5192	115.04	2.50481	1	18.4017	0	1	1	0	151.66	3	24.758	0	1	1	0	152.086	9	0	3.70498	4.21905	0.75	0	0	0	0	0	0	1	0	0	0	-0.493418	3	0.612783	1	1	0	2	4	15.7895	4.57692	0	0	7
376	137.739	23.6128	0	0	12.5406	53.17	10.3231	2	47.4373	1	0	1	1	61.55	2	25.9331	1	0	1	0	47.4373	5	2	5.54058	9.00039	0.25	0	0	0	0	0	0	1	1	0	0	-4.50695	2	0.87455	0	0	0	4	2	3.77358	10.3219	0	0	3
377	0	27.3234	0	0	12.8697	70.67	4.85418	0	51.479	0	0	1	1	79.05	2	42.194	0	1	1	1	107.813	10	2	5.88254	9.37852	-0.75	0	0	0	0	0	0	1	1	1	1	-5.14009	3	1.01198	2	0	0	6	3	6.66667	8.70085	0	0	7
379	63.2135	17.988	0	0	12.8724	47.16	17.9378	1	39.4533	0	0	0	0	47.16	2	21.2335	0	1	0	0	73.8319	4	2	5.87235	7.24162	2	0	0	0	0	0	10.674	1	0	0	0	-4.76578	2	0.782086	2	0	0	8	2	4.65116	7.83399	0	0	4
382	35.7918	36.3897	0	0	11.8863	74.6	5.78844	1	48.1332	1	0	0	1	74.6	3	38.2651	0	0	0	0	135.657	4	0	5.28981	9.44554	-10.5	0	0	0	0	0	9.36705	0	1	0	0	-3.55818	4	1.45559	4	0	0	8	0	7.27273	14.4733	0	0	4
384	0	23.9114	1	0	10.534	37.3	19.1822	0	37.709	0	0	0	1	37.3	6	14.9988	0	0	1	0	67.8283	2	0	3.53401	5.05749	-2.5	0	0	0	0	0	8.65283	0	1	0	0	-4.94439	2	1.08688	2	0	0	2	0	4	7.21212	0	0	2
385	41.6924	11.5914	0	0	11.1597	84.32	0.0192862	1	23.7278	1	0	0	0	84.32	4	26.7888	0	1	0	0	125.108	6	0	4.50528	4.41781	-5.5	0	1	0	1	0	8.87727	1	0	0	0	-1.04664	4	0.724461	5	1	0	4	2	14.2857	6.35833	0	0	6
386	0	17.3793	0	0	0	31.23	5.88815	0	34.3687	0	1	1	0	31.23	0	13.1165	0	0	0	0	30.3345	4	2	5.71176	7.73857	-0.75	0	0	0	0	0	0	1	1	0	0	-3.75168	1	0.827588	0	0	0	1	2	2.43902	11.5429	0	0	3
387	37.3189	19.687	0	0	13.0262	51.02	7.27929	1	44.2025	0	1	1	0	79.26	2	18.556	1	1	0	0	64.9646	6	1	6.02615	9.52478	1.75	0	0	0	0	0	0	1	0	0	0	-4.55841	1	0.78748	1	1	0	3	4	2.32558	12.07	1	0	5
390	0	18.5124	0	0	10.7541	41.57	4.28135	0	31.4806	0	0	1	1	41.57	1	14.2847	0	1	0	0	57.2799	4	1	3.75412	4.93519	-5	0	0	0	0	0	0	1	1	0	0	-2.75856	2	0.881541	3	0	0	3	2	4.25532	8.10476	0	0	4
392	0	26.0363	0	0	12.1143	74.27	2.41262	0	53.1398	1	0	1	1	74.27	1	37.9804	0	1	0	0	129.048	8	2	5.1143	8.6386	-5.25	0	0	0	0	0	9.28246	1	1	0	1	-3.33946	4	0.867875	6	0	0	6	3	7.14286	11.5356	0	0	8
393	0	26.0363	0	0	12.1143	74.27	2.41262	0	53.1398	1	0	1	1	74.27	1	37.9804	0	1	0	0	129.048	8	2	5.1143	8.6386	-5.25	0	0	0	0	0	9.28246	1	1	0	1	-3.33946	4	0.867875	6	0	0	6	3	7.14286	11.5356	0	0	8
394	0	7.11531	1	0	10.1428	86.63	1.03742	0	19.5437	0	0	0	0	86.63	2	25.8351	0	1	1	0	153.667	5	1	4.23551	3.00061	1	0	0	0	0	0	8.30135	1	0	0	0	-1.47625	4	0.508236	4	0	2	5	1	17.3913	5.32967	0	1	5
396	99.39	34.9219	0	0	12.3365	43.86	18.8713	1	61.2982	0	0	1	1	43.86	2	36.6584	0	1	0	1	74.6229	7	2	6.34004	9.773	-5	0	0	0	0	0	0	1	1	1	1	-5.61918	2	1.09131	2	1	0	5	3	3.27869	10.2298	0	0	6
403	36.0143	12.068	2	0	10.5772	117.69	0.588108	1	24.1413	0	0	0	0	117.69	3	47.8931	0	0	1	0	208.659	7	0	5.67456	4.2335	-5.25	0	0	0	0	0	8.57441	0	0	0	0	-0.275436	5	0.804531	5	0	4	0	1	21.7391	5.31429	0	0	7
404	0	0.815714	0	0	0	23.79	0.00891491	0	2.95465	0	0	0	0	23.79	1	3.25	0	0	0	0	31.0594	1	0	1.50694	0	2.25	0	0	0	0	0	0	0	0	0	0	-0.726961	0	0.203929	0	0	0	0	1	0	1.66667	0	0	1
405	0	15.6408	0	0	10.7409	74.68	3.91538	0	31.8561	0	0	0	1	83.06	3	34.5619	0	1	1	0	113.66	6	1	5.37188	5.58685	-0.5	0	0	0	0	0	8.79629	1	1	0	0	-2.80682	4	0.8232	2	0	0	2	1	10.5263	5.38012	0	0	5
406	0	4.77749	0	0	9.89014	80.39	1.4689	0	9.21764	0	0	0	0	88.77	2	17.6117	0	0	1	0	116.306	5	0	2.89014	1.06066	-1.5	0	0	0	0	0	8.06542	0	0	0	0	0.229438	3	0.597186	0	0	0	0	1	17.6471	2.53571	0	0	4
408	72.8456	33.2856	0	0	12.5071	136.03	4.86866	1	67.1487	1	0	1	1	136.03	1	39.4629	0	1	0	0	192.195	10	1	5.50707	9.90863	-4.5	0	0	0	0	0	9.84432	1	1	0	0	-3.87698	4	1.00865	6	3	0	8	6	6.34921	10.6023	0	0	9
409	0	28.9226	0	0	11.5631	63.69	6.87128	0	56.8087	0	0	1	1	63.69	1	24.0104	0	1	0	0	85.0653	6	2	4.56305	10.0254	-2	0	0	0	0	0	0	1	1	0	0	-4.76104	3	0.903832	5	0	0	5	3	4.91803	13.4637	0	0	6
410	0	10.765	0	0	11.4951	42.08	2.04632	0	20.4258	0	0	1	0	42.08	4	16.421	0	0	0	0	57.4814	4	0	4.4951	2.41837	-2.5	0	0	0	0	0	0	0	0	0	0	-1.51676	2	0.768926	0	0	0	0	2	7.14286	4.98901	0	0	3
411	0	57.4102	0	0	13.7768	29.54	8.08226	0	94.4907	1	0	1	1	29.54	1	31.071	0	1	0	0	39.2691	6	3	6.77684	13.9351	-7	0	0	0	0	0	0	1	1	0	0	-7.08378	2	1.33512	3	0	0	4	2	2.27273	11.546	0	0	3
412	50.8803	20.2875	0	0	0	36.26	10.8914	1	42.0795	0	0	1	0	36.26	0	22.9795	0	0	0	0	60.1437	4	2	5.36732	6.98578	0.25	0	0	0	0	0	0	1	0	0	1	-4.20048	1	0.845313	2	0	0	2	2	2.22222	8.60145	0	0	4
413	102.985	36.4041	0	0	12.7612	83.56	7.8505	1	69.557	2	1	1	1	120.18	2	35.8777	1	1	1	0	109.638	9	2	5.76118	12.2794	-1.5	0	0	0	0	0	0	1	1	0	0	-5.01127	3	1.07071	2	1	0	11	4	4.54545	10.5597	0	0	7
414	0	18.1602	0	0	12.1255	67.35	4.50659	0	37.5582	0	0	1	1	67.35	1	20.1251	0	1	1	0	90.8509	6	1	5.12552	6.20327	-2	0	0	0	1	0	0	1	0	0	0	-3.36806	2	0.756675	3	3	0	4	4	4.34783	8.82609	0	0	6
415	0	23.3679	0	0	12.069	23.55	8.8598	0	36.422	2	1	1	0	48.85	1	13.3733	0	0	0	0	31.3936	4	1	5.06903	7.45551	-5.25	0	0	0	0	0	0	1	1	0	0	-3.88943	1	1.06218	1	0	0	3	2	2.08333	10.2251	0	0	3
416	0	16.2697	0	0	11.9941	46.33	10.9082	0	34.3337	0	0	0	0	46.33	1	14.4444	0	1	0	0	61.1664	3	2	4.99409	6.72395	1.75	0	0	0	1	0	0	1	0	0	0	-4.44159	1	0.813485	1	1	0	4	2	2.63158	11.9579	0	0	3
417	0	12.9054	0	0	11.9355	55.62	4.48392	0	29.7796	2	0	0	0	55.62	1	17.8564	0	1	0	0	69.042	3	2	4.93551	6.76486	1.5	0	0	0	0	0	0	1	0	0	0	-3.17346	2	0.679232	3	0	0	2	1	6.25	12.7719	0	0	3
418	0	13.0323	0	0	11.9023	46.33	9.36071	0	29.7796	0	0	0	0	46.33	1	13.6078	0	1	0	0	61.1664	3	2	4.90225	6.76486	1.75	0	0	0	1	0	0	1	0	0	0	-3.9626	1	0.685912	1	1	0	3	2	3.0303	12.7719	0	0	3
419	66.8979	31.5474	0	0	12.9304	51.27	14.3087	1	54.1523	0	0	1	1	51.27	3	31.2228	1	1	0	0	72.6465	6	1	5.93037	9.95417	-7.5	0	0	0	0	5.58944	0	1	1	0	1	-5.0895	2	1.05158	3	1	0	2	3	3.44828	12.8207	0	0	6
421	0	12.0452	0	0	11.8614	58.86	4.00923	0	29.7796	2	0	0	0	58.86	1	17.3885	0	1	0	0	72.1663	4	2	4.86144	6.76486	1.25	0	0	0	1	0	0	1	0	0	0	-3.42874	2	0.63396	3	1	0	2	2	6.45161	12.7719	0	0	4
422	28.7057	24.9062	0	0	0	40.46	14.0737	1	35.7706	2	0	0	0	40.46	0	28.3257	0	0	0	0	100.327	3	1	6.08876	7.35063	-6.25	0	0	0	0	0	9.66232	0	1	0	0	-4.47356	2	1.18601	2	0	0	4	0	4.54545	14.1905	0	1	3
424	90.8977	21.117	0	0	12.7231	77.05	13.7953	2	45.7785	0	0	1	1	77.05	1	27.2571	1	1	0	0	91.171	8	1	5.72305	8.93491	-2.25	0	0	0	0	5.29666	0	1	1	0	0	-4.52283	2	0.844679	2	2	0	2	5	4.87805	12.54	1	0	6
426	0	60.9822	1	0	12.3781	199.95	0.11477	0	108.85	4	2	1	1	250.55	5	81.2647	0	1	1	0	316.032	14	2	6.49954	12.7448	-7	0	0	0	0	0	9.52169	1	1	0	0	-4.12376	7	1.38596	7	0	5	17	5	8.43373	13.4683	0	1	12
427	0	60.9822	1	0	12.3781	199.95	0.11477	0	108.85	4	2	1	1	250.55	5	81.2647	0	1	1	0	316.032	14	2	6.49954	12.7448	-7	0	0	0	0	0	9.52169	1	1	0	0	-4.12376	7	1.38596	7	0	5	17	5	8.43373	13.4683	0	1	12
428	21.9123	8.34441	0	0	11.1397	67.22	0.929755	1	18.2518	0	0	0	0	67.22	4	19.0096	0	1	0	0	88.2104	5	0	4.34565	4.23868	-3.25	0	1	0	1	0	0	0	0	0	0	-1.37359	2	0.641877	2	2	0	1	3	9.09091	7.21795	0	0	5
430	21.9123	6.99131	0	0	11.1212	72.68	0.162213	1	18.2518	0	0	0	0	72.68	2	18.7411	1	1	0	0	88.2104	6	0	4.30398	4.23868	-2.5	0	1	0	1	0	0	0	0	0	0	-1.24157	2	0.537793	2	3	0	1	4	9.52381	7.21795	0	0	5
431	0	16.7657	0	0	11.8423	61.36	12.5485	0	41.1862	0	0	0	0	61.36	1	51.3657	0	1	0	0	148.73	9	2	4.84228	5.54126	0.25	0	0	0	1	0	9.57935	1	1	0	1	-5.3538	2	0.728945	2	1	1	4	2	6.25	7.83399	0	1	7
432	0	0	0	0	0	0	0	0	0	0	0	0	0	0	0	0	0	0	0	0	0	1	0	0	0	0	0	0	0	0	0	0	0	0	0	0	0	0	0	0	0	0	0	0	0	0	0	0	0
434	25.9525	22.6946	0	0	12.182	81.42	4.81389	1	48.3396	0	1	1	1	81.42	4	39.0193	0	1	1	0	120.296	7	1	6.02379	10.9841	-1.5	0	0	0	1	0	10.9164	1	1	0	0	-4.21136	4	0.87287	4	0	1	8	2	9.52381	17.8462	0	0	6
435	0	14.6351	0	0	11.0264	78.43	0.503292	0	28.4914	2	0	0	1	86.81	2	25.1824	0	1	1	0	121.412	6	1	4.02641	4.19442	-1	0	0	0	0	0	9.8917	1	0	0	0	-1.85727	3	0.813064	1	0	0	2	2	7.89474	5.79085	0	0	5
436	0	2.92799	0	0	0	0	3.30135	0	3.23205	0	0	0	0	0	0	3.71605	0	0	0	0	0	2	0	0.929012	0	-2	0	0	0	0	0	0	0	0	0	0	-1.77617	0	0.731998	0	0	0	0	0	0	1.5	0	0	0
437	71.7172	16.1733	0	0	11.0186	89.77	6.57511	1	42.9178	0	0	1	1	89.77	2	21.1578	0	0	1	0	88.6675	7	1	4.01861	7.28024	3	0	0	0	0	0	0	1	1	0	0	-3.99908	2	0.646932	0	1	0	4	5	4.54545	9.28333	0	0	5
438	39.488	12.8114	0	1	0	36.42	7.89513	1	21.2061	0	0	0	0	36.42	1	7.93654	0	0	0	0	52.807	4	1	1.31834	5.11516	-1.5	0	0	0	1	0	0	1	0	0	0	-3.62122	0	0.854096	0	3	0	0	3	0	6.31429	0	0	3
439	0	4.50542	0	0	0	49.87	0.13405	0	7.02592	0	1	0	0	75.17	1	11.2205	0	0	0	0	79.5293	4	0	3.18042	0.866025	-2.25	0	0	0	1	0	0	0	0	0	0	-0.990076	0	0.643632	0	1	0	0	2	0	2.47619	0	0	3
440	136.422	15.6371	0	0	10.9789	90.02	5.78003	2	40.269	0	0	1	1	90.02	2	22.4247	2	0	1	0	81.3893	7	1	3.97889	7.06131	1.5	0	0	0	0	5.8472	0	1	1	0	0	-4.03107	3	0.651545	2	1	0	5	4	7.14286	8.82246	0	0	5
442	29.0762	11.288	0	0	11.375	58.2	0.0548536	1	17.9816	1	0	0	0	58.2	2	19.149	0	1	0	0	86.3114	4	0	4.64847	3.85964	-5.5	0	0	0	0	0	0	0	0	0	0	-1.22849	2	0.868308	2	0	1	0	2	7.40741	5.80769	0	0	4
443	182.487	32.1547	0	0	12.3106	43.86	12.5347	2	52.9713	0	1	1	1	72.1	2	24.9311	0	1	0	0	59.6628	7	1	6.0562	10.4497	-5.25	0	0	0	0	0	0	1	1	0	0	-5.2965	2	1.10878	2	1	0	5	3	3.63636	9.75123	0	0	5
445	74.0998	20.4653	0	0	12.3452	64.43	4.03399	2	39.459	0	1	1	0	92.67	2	27.6544	2	1	1	0	81.1996	7	0	5.3605	7.89886	-4	0	0	0	0	0	0	1	1	0	0	-3.37563	3	0.930243	4	1	0	9	3	7.69231	10.7446	1	0	5
446	0	45.8769	0	0	12.9275	111.96	17.0843	0	70.6787	1	0	1	1	111.96	1	35.8076	0	1	0	0	154.807	8	0	5.92746	10.4483	-10.5	0	0	0	0	0	0	1	1	0	0	-5.08362	2	1.34932	3	2	0	5	6	2.7027	10.0677	0	0	8
447	0	21.6123	0	0	11.955	41.57	10.4208	0	41.6315	0	0	1	1	41.57	1	17.2343	0	1	0	0	57.2799	4	2	4.95505	6.78783	-2	0	0	0	0	0	0	1	1	0	0	-4.05146	2	0.83124	3	0	0	3	2	3.7037	9.75385	0	0	4
448	34.3405	6.11946	0	0	10.2745	63.64	1.94302	1	15.2609	0	0	0	0	63.64	2	21.5466	0	0	1	0	82.4926	6	0	3.71425	2.67239	-1.25	0	0	0	0	0	0	1	0	0	0	-1.85421	2	0.509955	0	3	0	2	3	10	4.84848	0	0	4
449	0	1.2393	0	0	0	20.23	0.0407549	0	2.95465	0	0	0	0	20.23	0	4.33333	0	0	0	0	42.6833	1	0	1.63889	0	0.25	0	0	0	0	0	7.63889	0	0	0	0	-0.540319	1	0.309824	1	0	0	0	0	12.5	1.66667	0	0	1
451	53.1277	22.1051	0	0	12.2057	72.42	9.70074	1	50.0166	0	0	1	1	72.42	3	25.128	1	1	0	0	104.156	6	1	5.20574	8.50051	1.5	0	0	1	0	0	10.1052	1	1	0	0	-4.20084	2	0.818706	2	0	1	4	4	4.25532	10.9231	0	0	5
452	0	10.5011	0	0	10.8646	75.27	0.0834773	0	23.2231	0	0	0	0	75.27	5	28.2067	0	1	0	0	111.456	5	0	4.62861	4.29995	-2.75	0	2	0	1	0	0	1	0	0	0	-1.28644	3	0.700072	3	1	0	2	2	11.1111	5.10476	0	0	5
453	52.7473	27.3981	0	0	0	32.26	34.5029	1	46.413	0	0	1	0	32.26	0	17.6554	0	0	0	0	39.8197	6	1	2.35399	8.8881	-4.5	0	0	0	0	0	0	1	0	0	0	-6.00284	0	1.05377	0	3	0	0	4	0	9.88923	0	0	4
454	0	18.512	0	0	12.4511	85.61	0.67388	0	35.385	2	0	1	0	85.61	1	27.6837	0	1	0	0	116.063	7	1	5.45109	5.89371	-5.25	0	0	0	0	0	0	1	0	0	0	-2.15832	3	0.881525	5	0	1	5	3	7.31707	7.57143	0	0	6
456	37.4146	38.5846	0	0	11.8954	94.83	2.61875	1	52.4583	1	0	0	1	94.83	3	48.342	0	0	0	0	178.34	5	0	5.36157	9.71611	-11.25	0	0	1	0	0	9.37226	0	1	0	0	-3.09707	5	1.48402	5	0	1	10	0	8.92857	14.3908	0	0	5
459	134.102	15.3315	0	0	0	81.65	12.162	2	37.1875	0	0	1	0	81.65	0	39.1398	0	0	0	0	139.501	9	1	6.11247	5.96408	-1.25	0	0	1	0	0	10.9583	1	0	0	0	-2.82388	1	0.696885	1	4	0	0	6	2.94118	6.91775	0	0	7
460	0	22.4878	0	0	0	45.59	4.80546	0	41.1669	2	0	1	1	45.59	1	19.8584	0	0	0	0	73.5931	4	1	5.15186	8.16095	-4	0	0	0	0	0	11.1519	1	1	0	0	-3.63561	2	0.93699	3	0	0	4	2	4.16667	10.6159	0	0	4
462	35.3102	8.0243	0	1	0	36.42	5.60897	1	18.7406	0	0	0	0	36.42	1	23.4683	0	0	0	0	82.7273	5	1	5.10123	3.14031	-1.5	0	0	0	1	0	0	1	0	0	0	-2.53817	0	0.573165	0	3	0	0	3	0	6.31868	0	0	5
463	195.546	27.7549	0	0	12.665	59.39	11.6852	2	60.6465	0	0	1	1	59.39	1	21.444	1	1	0	0	73.9429	6	3	5.66501	10.1957	0.75	0	0	0	0	0	0	1	1	0	0	-5.12268	2	0.81632	3	0	0	3	4	3.125	12.2246	0	0	5
465	60.3601	20.6904	0	0	0	43.95	4.88803	1	29.7152	1	0	1	0	76.04	1	10.4019	1	0	0	0	37.9206	5	0	1.92144	6.08862	-8.25	0	0	0	1	0	0	1	0	0	0	-3.33142	0	1.03452	0	2	0	0	4	0	7.69474	0	0	3
466	0	9.62344	0	0	11.1776	72.19	0.898807	0	21.9718	0	0	0	0	72.19	2	20.0732	0	1	0	0	101.198	4	1	4.5732	3.83287	0.25	0	0	0	0	0	0	1	0	0	0	-1.44891	2	0.641562	2	0	0	3	2	6.89655	4.85714	0	0	4
468	0	15.2397	0	0	10.5244	90.65	0.0331141	0	24.7191	0	0	1	0	90.65	2	22.1405	0	1	1	0	123.198	6	0	3.93509	2.41468	-6.75	0	0	0	2	0	0	1	1	0	0	-1.31864	4	0.952479	6	0	0	2	2	11.1111	4.08333	0	0	6
469	37.4146	36.2768	0	0	11.8086	94.83	2.33444	1	52.4583	1	0	0	1	94.83	4	47.8584	0	0	0	0	178.34	5	0	5.3504	9.71611	-9.75	0	0	1	0	0	9.36312	0	1	0	0	-3.00686	5	1.39526	5	0	1	10	0	9.25926	14.3908	0	0	5
470	0	0.954154	0	0	0	0	2.44767	0	2.95465	0	0	0	0	0	2	1.44444	0	0	0	0	0	0	0	0.361111	0	1.5	0	0	0	0	0	0	0	0	0	0	-1.2821	0	0.238538	0	0	0	0	0	0	1.66667	0	0	0
471	71.2676	24.9212	0	0	12.8924	60.85	4.44004	1	41.6149	1	0	1	1	69.23	2	32.2967	0	1	1	0	91.6392	6	1	5.89238	8.10703	-5.5	0	0	0	0	0	9.59041	1	1	0	0	-3.57932	3	1.03838	1	0	2	2	2	5.76923	8.67754	0	1	5
472	0	20.0662	0	0	11.6144	64.63	3.63482	0	43.3157	0	0	1	1	64.63	3	48.53	0	0	1	0	135.181	8	1	5.06957	6.06778	-3.75	0	0	0	0	0	0	1	1	0	1	-3.9072	4	0.83609	6	0	0	4	1	10	7.87319	0	0	8
473	0	4.53577	0	0	0	36.47	0.222981	0	11.5379	0	0	0	0	36.47	1	4.40049	0	0	0	0	56.0531	3	0	2.20024	2.19271	0.25	0	0	0	0	0	8.20024	1	0	0	0	-1.43679	1	0.453577	0	0	0	1	2	5.26316	4.82222	0	0	2
474	55.5461	13.3093	0	0	10.5767	63.64	8.73284	1	23.7827	0	0	1	1	63.64	2	23.262	0	0	1	0	82.4926	6	0	3.80031	3.48846	-3.75	0	0	0	0	0	0	1	1	0	1	-3.09637	2	0.782901	0	3	0	2	3	5.71429	6.36029	0	0	4
475	0	21.0004	1	0	11.2436	65.78	2.79078	0	43.7382	0	0	1	1	65.78	3	39.1223	0	0	1	0	117.306	7	1	6.59886	7.04833	-4.75	0	0	0	0	0	9.17772	1	1	0	0	-3.01806	3	0.875016	3	0	0	7	3	6.81818	9.66304	0	0	7
476	114.448	15.42	0	0	0	61.42	14.1537	2	38.1477	1	0	1	0	61.42	0	13.2077	1	0	0	0	66.652	7	2	1.90575	7.7325	2.75	0	0	0	0	0	0	1	0	0	0	-4.37113	0	0.670435	0	3	0	0	6	0	8.81028	0	0	4
477	21.0263	13.0907	0	1	0	41.62	10.2242	1	29.5396	1	0	1	0	41.62	1	9.65133	0	0	0	0	52.807	3	2	2.10671	7.01846	1.5	0	0	0	1	0	0	1	0	0	0	-3.88459	0	0.688985	0	3	0	0	3	0	14.5497	0	0	3
478	0	0	0	0	0	0	0	0	0	0	0	0	0	0	0	0	0	0	0	0	0	1	0	0	0	0	0	0	0	0	0	0	0	0	0	0	0	0	0	0	0	0	0	0	0	0	0	0	0
479	0	23.2316	0	0	11.6532	87.66	2.5255	0	42.0803	2	0	1	1	87.66	2	32.6354	0	1	0	0	139.995	6	1	4.82207	5.18851	-4.25	0	0	0	0	0	9.89204	1	1	0	0	-2.45818	4	0.967984	5	0	0	10	2	7.69231	7.11594	0	0	6
480	0	23.0252	0	0	11.8565	67.43	5.41557	0	46.5178	2	0	1	1	75.81	2	28.4927	0	0	1	0	91.3343	6	2	4.8565	7.72076	-0.5	0	0	0	0	0	0	1	1	0	0	-3.63591	3	0.885584	2	0	0	3	2	5.76923	9.59385	0	0	5
481	0	10.2618	0	0	12.321	70.67	3.1427	0	29.6181	0	0	0	1	70.67	2	27.5632	0	0	0	0	121.512	4	2	5.32099	5.9122	4.75	0	0	0	0	0	9.24583	0	1	0	0	-3.30131	4	0.540093	5	0	0	5	0	13.7931	9.34503	0	2	4
482	27.8048	5.41772	0	0	10.4568	17.07	2.08023	1	11.2537	0	1	0	0	45.31	2	6.91353	1	0	0	0	25.1449	2	0	3.45677	2.43218	1.75	0	0	0	0	0	0	0	0	0	0	-2.26424	1	0.541772	1	0	0	2	0	5.55556	4.28889	0	0	1
483	0	12.7505	0	0	0	40.19	2.40054	0	22.7187	1	0	1	0	40.19	0	8.04561	0	0	0	0	55.9313	4	0	1.49106	4.31741	-3.75	0	0	0	0	0	0	1	0	0	0	-2.19241	0	0.796907	0	1	0	0	4	0	7.025	0	0	4
485	38.8016	18.9599	0	0	12.0666	64.43	7.23236	1	43.5824	0	0	1	0	64.43	2	47.2232	1	1	1	0	111.12	8	1	5.59492	7.21255	-3.5	0	0	0	0	0	0	1	1	0	1	-3.46277	3	0.789995	4	1	0	9	3	7.69231	11.837	1	0	7
486	0	2.5691	0	0	0	0	3.30135	0	2.95465	0	0	0	0	0	0	3.7716	0	0	0	0	0	2	0	0.942901	0	-2	0	0	0	0	0	0	0	0	0	0	-1.75602	0	0.642275	0	0	0	0	0	0	1.66667	0	0	0
487	73.1582	26.3314	0	0	11.91	54.71	13.9196	1	50.7209	1	0	1	1	54.71	2	25.8591	0	0	1	0	68.2798	6	2	4.90998	9.76896	-3.25	0	0	0	0	0	0	1	1	0	0	-4.84099	3	0.907978	5	0	0	5	2	5.76923	12.4975	0	0	5
490	0	11.9542	0	0	0	40.46	10.9277	0	26.3829	0	0	0	0	40.46	0	13.6525	0	0	0	0	85.3667	2	2	3.2963	4.34153	3.5	0	0	0	0	0	9.2963	0	1	0	0	-3.91614	2	0.703188	2	0	0	6	0	6.06061	6.26471	0	2	2
491	81.4942	19.2281	0	0	11.4999	86.53	9.11846	1	43.0761	0	1	1	1	111.83	2	22.8737	0	0	1	0	85.5432	7	1	4.49986	7.76291	3.25	0	0	0	0	0	0	1	1	0	0	-4.28209	2	0.739544	0	1	0	6	4	4.34783	9.19692	0	0	4
492	0	17.5388	0	0	11.4549	66.48	1.95109	0	33.6893	0	0	1	0	66.48	4	32.8043	0	1	0	0	96.5698	5	0	5.39134	5.28979	-4	0	2	0	1	0	0	1	1	0	0	-2.48885	3	0.923097	3	1	0	5	2	8.10811	5.50877	0	0	5
493	32.3655	33.7017	0	0	11.8579	34.14	16.3987	1	41.9373	0	0	0	1	34.14	3	21.6902	0	0	0	0	50.2899	2	0	5.14672	8.60811	-9	0	0	0	0	0	0	0	1	0	0	-4.69882	2	1.46529	2	0	0	4	0	3.77358	14.336	0	0	2
494	36.8304	17.435	0	0	11.9532	64.43	5.98329	1	41.6506	0	0	1	0	64.43	2	45.3387	1	1	1	0	111.12	8	1	5.46912	6.82621	-3	0	0	0	0	0	0	1	1	0	1	-3.31981	3	0.758043	4	1	0	9	3	8.33333	11.6838	1	0	7
497	61.8563	14.3168	0	0	11.5125	60.44	7.90629	1	37.1751	0	0	0	1	68.82	4	31.3737	0	0	1	0	80.4578	5	2	5.00868	7.07519	4.75	0	0	0	0	0	0	0	1	0	0	-3.75779	4	0.650764	3	0	0	7	0	11.1111	8.14286	0	0	4
498	38.7532	12.2806	0	0	11.9455	26.93	9.7765	1	22.1819	0	0	0	0	26.93	2	9.89093	0	1	0	0	31.1485	4	1	4.94547	5.30385	0.25	0	0	0	0	0	0	1	0	0	0	-3.74618	1	0.818707	1	0	0	1	2	3.84615	6.11429	0	0	3
499	0	7.00408	0	0	0	25.78	0.424945	0	12.5733	0	0	0	0	25.78	0	5.24074	0	0	0	0	33.5711	2	0	1.31019	2.1021	0	0	0	0	0	0	0	0	0	0	0	-1.80246	0	0.700408	0	0	0	0	2	0	4.6	0	0	2
500	0	3.88164	0	0	0	0	4.95686	0	4.4325	0	0	0	0	0	0	5.86111	0	0	0	0	0	3	0	0.984568	0	-2.75	0	0	0	0	0	0	0	0	0	0	-2.29093	0	0.776328	0	0	0	0	0	0	1.8	0	0	0
501	186.819	33.2872	0	0	13.3728	65.64	9.16462	2	61.6909	2	0	1	1	74.02	2	36.4753	1	1	1	0	59.9557	8	2	6.37277	11.6821	-4	0	0	0	0	0	0	1	1	0	0	-5.27564	3	1.0087	2	0	0	5	3	4.7619	11.9527	0	0	5
502	39.3074	17.7494	0	0	0	50.41	11.9855	1	42.4267	0	0	1	1	50.41	1	29.5978	1	0	0	0	91.2145	6	2	6.32862	8.11632	1.5	0	0	0	0	0	9.57473	1	1	0	0	-4.68918	1	0.739559	1	1	0	3	3	2.7027	12.5725	0	0	4
503	71.7868	28.3352	0	0	12.7439	64.43	12.2413	2	50.2589	1	0	1	0	64.43	2	32.1705	1	1	1	0	81.1996	7	1	6.16148	10.0815	-4.5	0	0	0	0	0	0	1	1	0	0	-4.92408	3	1.08981	4	1	0	11	3	6.52174	14.0246	1	0	5
505	72.7767	27.939	0	0	12.7328	64.43	12.2413	2	49.9826	1	0	1	0	64.43	2	31.8946	1	1	1	0	81.1996	7	1	6.10203	9.49191	-4.5	0	0	0	0	0	0	1	1	0	0	-4.92408	3	1.07458	4	1	0	11	3	6.52174	13.9723	1	0	5
506	39.0804	20.2444	0	0	0	47.86	15.5522	1	43.7725	0	0	1	0	47.86	2	30.1685	0	1	0	0	95.5641	6	2	6.33982	8.16881	-1	0	0	0	0	0	10.6469	1	1	0	0	-4.79482	1	0.843517	1	1	0	2	3	2.5641	12.4964	0	0	5
507	0	11.3919	0	0	11.9862	58.2	1.54528	0	24.5287	0	0	0	0	58.2	2	20.6723	0	1	0	0	86.3114	4	1	4.98621	5.18377	-1	0	0	0	0	0	0	1	0	0	0	-1.93625	2	0.711991	2	1	0	2	2	6.66667	6.35833	0	0	4
509	0	24.0213	0	0	0	40.16	5.91203	0	47.0546	1	0	1	1	40.16	0	18.2885	0	0	0	0	47.1239	5	2	2.16243	9.05609	-3.25	0	0	0	0	0	0	1	1	0	0	-4.14172	4	0.923895	8	0	0	8	1	7.84314	15.1538	0	0	5
511	0	19.8509	0	0	11.4909	66.48	2.19846	0	33.6893	0	0	1	0	66.48	4	31.8012	0	1	0	0	96.5698	5	0	5.45912	5.28979	-6	0	2	0	1	0	0	1	1	0	0	-2.48715	3	1.04479	3	1	0	5	2	7.31707	5.50877	0	0	5
513	52.1951	19.9911	0	0	12.3624	49.77	4.87148	1	33.678	3	0	1	0	49.77	1	23.3652	0	0	1	0	81.9525	4	1	5.36239	6.61203	-5.75	0	0	0	0	0	9.52867	1	1	0	0	-2.75647	3	0.951958	4	0	0	7	1	6.81818	7.85238	0	0	4
514	0	6.57378	0	0	10.8388	52.32	1.89597	0	15.5377	0	0	0	0	52.32	1	13.3243	0	1	0	0	69.042	3	1	3.8388	2.84321	1	0	0	0	0	0	0	1	0	0	0	-1.80065	2	0.547815	3	0	0	1	1	8.69565	5.16667	0	0	3
515	38.7532	9.60861	0	0	11.578	26.93	7.37463	1	22.1819	0	0	0	0	26.93	2	19.843	0	1	0	0	46.1086	4	1	5.34356	4.26877	0	0	0	0	0	0	0	1	0	0	0	-2.80978	1	0.640574	1	0	0	1	2	3.84615	6.11429	0	0	4
516	39.5365	9.41856	0	0	11.5946	26.93	7.37463	1	21.8462	0	0	0	0	26.93	2	18.6183	0	1	0	0	46.1086	4	1	4.71452	4.26877	0	0	0	0	0	0	0	1	0	0	0	-2.84161	1	0.627904	1	0	0	1	2	3.84615	6.19048	0	0	4
519	0	14.7713	0	0	11.7289	34.03	3.3131	0	21.2171	0	0	0	0	34.03	3	13.2834	0	1	0	0	46.28	4	0	4.7289	5.65778	-5.5	0	0	0	0	0	0	1	0	0	0	-2.51897	1	0.984751	1	0	0	0	2	3.57143	10.1905	0	0	3
520	98.1625	30.871	0	0	12.6526	68.18	20.37	1	60.6435	0	0	1	1	68.18	1	26.464	1	1	0	0	88.8293	7	2	5.6526	8.654	-1.25	0	0	0	0	0	0	1	1	0	0	-5.47427	2	0.964717	3	1	0	6	4	3.1746	10.2036	0	0	5
521	150.995	39.4526	0	0	0	74.31	8.79969	2	68.8792	2	0	1	1	74.31	0	27.7729	1	0	0	0	104.652	6	2	4.94001	11.2133	-5	0	0	1	0	0	10.94	1	1	0	0	-5.17706	2	1.16037	3	1	0	10	4	2.94118	12.5258	0	0	5
523	33.9565	12.462	0	0	11.0949	85.24	0.540194	1	30.7986	1	0	1	0	85.24	4	38.3961	0	1	0	0	121.715	6	1	5.17366	6.58397	-0.75	0	2	0	0	0	0	1	1	0	0	-1.86319	4	0.655896	4	0	2	6	2	13.7931	8.96491	0	0	6
525	26.9857	5.90627	0	1	0	77.29	0.0584713	1	11.7572	0	1	0	0	105.53	1	8.07604	0	0	0	0	99.3654	5	0	1.12813	2.95151	-0.5	0	0	0	1	0	0	1	0	0	0	-1.22611	0	0.590627	0	4	0	0	4	0	4.2	0	0	4
526	0	0	0	0	0	0	4.23536	0	0	0	0	0	0	0	0	0	0	0	0	0	58.1962	1	0	0	0	0	0	0	0	0	0	0	0	0	0	0	0.635193	1	0	0	0	0	0	0	33.3333	0	0	0	1
527	15.581	4.17176	0	0	0	38.69	0.479658	1	11.2365	0	0	0	0	38.69	0	11.9559	0	0	1	0	64.6831	3	1	2.96083	2.93724	0.75	0	0	0	0	0	8.96083	0	0	0	0	-1.84233	3	0.417176	5	0	1	0	0	18.75	6.93333	0	1	3
528	14.1373	6.82433	0	0	0	43.6	2.7764	1	10.9937	0	0	0	0	43.6	0	4.7987	0	0	0	0	49.744	4	0	0.918611	2.86354	-2.25	0	0	0	0	0	0	1	0	0	0	-1.7669	0	0.682433	0	3	0	0	4	0	7.64444	0	0	3
529	38.581	18.4509	0	0	0	50.41	18.2672	1	43.5295	0	0	1	0	50.41	1	31.0517	1	1	0	0	91.2145	6	2	6.34789	8.18675	1.5	0	0	0	0	0	10.515	1	0	0	0	-5.07555	1	0.768789	1	1	0	4	3	2.7027	12.5326	0	0	4
531	0	3.42344	0	0	0	20.23	0.639938	0	4.09272	0	0	0	0	20.23	0	4.23611	0	0	0	0	42.6833	1	0	2.06625	0.353553	-2.25	0	0	0	0	0	8.06625	0	0	0	0	-0.888615	1	0.684688	1	0	0	0	0	6.66667	2	0	0	1
532	0	2.23864	0	0	0	0	2.79546	0	4.4325	0	0	0	0	0	1	10.5988	0	0	0	0	29.9202	3	0	2.49306	0	-1.75	0	0	0	0	0	0	0	0	0	0	-1.75627	0	0.447729	0	0	0	0	0	0	1.8	0	0	2
533	0	18.4309	0	0	12.1355	54.46	7.40479	0	37.5582	0	0	1	1	54.46	1	18.3041	0	1	1	0	74.0654	5	1	5.13552	6.20327	-1.5	0	0	0	1	0	0	1	1	0	0	-3.78997	2	0.767956	3	1	0	4	3	4.25532	8.82609	0	0	5
534	0	15.2847	0	0	0	32.7	4.2796	0	25.2895	0	0	1	1	32.7	0	11.3259	0	0	0	0	56.8075	3	1	2.72854	4.45583	-4.5	0	0	0	0	0	8.72854	1	0	0	0	-2.6593	2	0.849152	3	0	0	4	1	4.87805	7.41176	0	0	3
535	0	55.5473	0	0	11.7749	47.1	24.5223	0	103.821	3	0	1	1	47.1	2	101.92	0	1	0	0	167.508	13	2	6.91497	10.8367	-13.25	0	0	0	1	0	0	1	1	0	1	-7.36358	2	1.2918	2	1	0	6	4	2.5641	10.9435	0	0	13
536	0	43.6001	0	0	11.6992	72.83	16.0344	0	60.554	3	0	0	1	72.83	4	40.5882	0	0	1	0	114.973	5	0	5.86587	8.53836	-11.75	0	0	0	0	0	9.91769	0	1	0	0	-4.92514	5	1.45334	7	0	0	12	0	7.35294	10.9425	0	0	5
538	103.199	37.0893	0	0	12.3649	43.86	20.6333	1	63.9348	0	0	1	1	43.86	2	37.3787	0	1	0	1	74.6229	7	2	6.49893	9.99142	-5.5	0	0	0	0	0	0	1	1	1	1	-5.85622	2	1.12392	2	1	0	5	3	3.125	10.2689	0	0	6
539	62.8277	22.743	0	0	12.9534	73.49	3.84567	1	49.4079	0	0	1	1	73.49	1	22.3816	2	1	0	0	77.1897	7	1	5.95338	8.76693	-2.25	0	0	0	0	0	0	1	1	0	0	-3.75782	2	0.812249	3	1	0	4	5	3.77358	10.6164	1	0	6
540	38.15	7.05031	0	0	10.2995	83.87	0.38684	1	17.666	1	0	0	0	83.87	2	27.5599	0	0	1	0	125.176	7	0	3.85777	2.84133	-2	0	0	0	0	0	8.88974	1	0	0	0	-1.38856	3	0.542331	1	3	0	2	3	14.2857	4.91026	0	0	5
541	46.4111	8.89522	0	0	10.4277	93.1	0.0423153	1	21.2411	1	0	1	0	93.1	2	30.0821	0	0	1	0	136.176	8	0	3.57906	3.3633	-3.5	0	0	0	0	0	9.29543	1	0	0	0	-1.15581	4	0.593014	3	3	0	3	3	16	5.4	0	0	6
542	0	19.2608	0	1	0	57.68	4.38265	0	32.2543	1	0	1	1	57.68	1	13.7795	0	0	0	0	81.8177	5	1	2.52639	5.92816	-6.5	0	0	0	1	0	0	1	0	0	0	-2.46561	1	0.875492	2	3	0	1	4	2.08333	10.2294	0	0	5
543	35.2808	15.4919	0	0	0	43.07	22.4613	1	36.7853	0	0	1	0	43.07	1	12.9588	0	0	0	0	50.1115	5	2	2.1169	7.84096	3	0	0	0	0	0	0	1	0	0	0	-4.89242	0	0.704178	0	2	0	0	4	0	12.316	0	0	3
546	28.7283	30.1794	0	0	11.7873	37.3	13.6587	1	36.4671	1	0	0	0	37.3	2	20.0005	0	0	0	0	67.8283	2	0	4.78735	7.73522	-9.5	0	0	0	0	0	10.4492	0	1	0	0	-4.30827	2	1.43711	2	0	0	4	0	4.08163	14.1381	0	0	2
547	0	28.3578	0	0	0	29.46	20.2065	0	40.8199	0	0	0	0	29.46	1	17.7562	0	0	0	0	53.6832	2	1	4.67984	7.38641	-5.25	0	0	0	0	0	10.6798	0	0	0	0	-5.41628	2	1.23295	3	0	0	7	0	3.77358	11.8024	0	1	2
548	0	3.27049	0	0	9.82153	26.3	0.343598	0	5.69869	0	0	0	0	26.3	1	7.44861	0	0	1	0	36.1448	2	0	2.82153	0.57735	-1.75	0	0	0	0	0	0	0	0	0	0	-0.735613	2	0.545082	3	0	0	0	0	14.2857	2.13333	0	0	2
549	0	20.7095	0	0	0	23.47	11.5404	0	30.4461	1	0	0	0	23.47	0	10.1002	0	0	0	0	45.8077	2	1	3.91396	7.17083	-5.5	0	0	0	0	0	9.91396	1	0	0	0	-4.01113	1	1.08997	1	0	0	4	1	2.38095	12.9708	0	1	2
550	0	20.7095	0	0	0	23.47	11.5404	0	30.4461	1	0	0	0	23.47	0	10.1002	0	0	0	0	45.8077	2	1	3.91396	7.17083	-5.5	0	0	0	0	0	9.91396	1	0	0	0	-4.01113	1	1.08997	1	0	0	4	1	2.38095	12.9708	0	1	2
551	0	16.2338	0	0	11.5828	55.4	5.43586	0	32.6518	0	0	1	1	55.4	3	26.3298	0	0	1	0	79.3005	5	1	5.02145	5.81209	-1.25	0	0	0	0	0	0	1	1	0	0	-3.43407	3	0.811689	4	0	0	2	1	8.33333	7.04737	0	0	4
552	45.9532	12.7379	0	0	12.353	30.17	5.37734	1	27.0833	0	0	1	0	30.17	2	10.7059	0	1	0	0	34.2728	4	1	5.35297	5.5072	-1.5	0	0	0	0	0	0	1	0	0	0	-2.62386	1	0.749289	1	0	0	1	3	2.94118	6.23529	0	0	4
554	0	11.0121	0	0	11.827	43.09	10.6783	0	27.987	0	0	0	0	43.09	2	13.0388	0	1	0	0	58.0421	2	2	4.82704	5.93739	4.5	0	0	0	0	0	0	1	0	0	0	-3.60708	1	0.611781	1	0	0	2	1	3.22581	11.9608	0	0	2
557	0	0.544331	0	0	0	20.23	0.662596	0	1	0	0	0	0	20.23	0	2	0	0	0	0	42.6833	1	0	1	0	-0.75	0	0	0	0	0	7	0	0	0	0	0.11539	1	0.272166	1	0	0	0	0	16.6667	1	0	0	1
559	0	0	0	0	0	0	0	0	0	0	0	0	0	0	0	0	0	0	0	0	0	1	0	0	0	0	0	0	0	0	0	0	0	0	0	0	0	0	0	0	0	0	0	0	0	0	0	0	0
560	0	0.393743	0	0	8.11111	53.47	18.0203	0	1.91421	0	0	0	0	53.47	2	3.5	0	1	0	0	56.9229	3	0	1.11111	0	1.25	0	0	0	0	0	0	0	0	0	0	1.20987	1	0.131248	0	0	0	0	2	33.3333	1.33333	0	0	2
561	0	0.8	0	0	0	52.04	4.52323	0	1	0	0	0	0	52.04	0	0	0	0	0	0	65.5493	2	0	0	0	-0.5	0	0	0	0	0	0	0	0	0	0	0.794406	0	0.4	0	0	0	0	2	0	1	0	0	2
562	0	4.94045	0	0	0	20.23	1.46265	0	5.69869	0	0	0	0	20.23	0	4.84722	0	0	0	0	42.6833	1	0	2.23667	0.57735	-2.75	0	0	0	0	0	8.23667	0	0	0	0	-1.18267	1	0.823409	1	0	0	0	0	5.55556	2.13333	0	0	1
563	0	4.94418	0	0	0	20.23	1.46265	0	5.73059	0	0	0	0	20.23	0	4.86574	0	0	0	0	42.6833	1	0	2.33477	0.288675	-2.75	0	0	0	0	0	8.33477	0	0	0	0	-1.19829	1	0.82403	1	0	0	0	0	5.55556	2.06667	0	0	1
564	0	10.4693	0	0	10.8094	63.32	2.0615	0	20.376	0	0	1	0	63.32	1	18.1256	0	1	0	0	100.725	3	1	4.16093	3.33182	-0.25	0	0	1	0	0	10.1609	1	0	0	0	-1.83087	2	0.747807	2	0	0	2	1	6.89655	4.7033	0	0	3
566	0	15.6916	0	0	10.9723	58.2	1.52537	0	22.7253	0	0	0	0	58.2	2	18.5215	0	1	0	0	86.3114	4	0	4.79829	3.40121	-6	0	1	0	1	0	0	1	0	0	0	-2.07018	2	1.04611	2	1	0	4	2	5.71429	5.12381	0	0	4
567	0	9.76768	0	0	0	20.08	8.6764	0	18.1248	0	0	0	0	20.08	1	8.99019	0	0	0	0	26.8361	2	1	4.4951	2.2764	0.25	0	0	0	0	0	0	1	0	0	0	-2.43061	1	0.75136	0	0	0	1	1	3.57143	4.84615	0	0	1
568	0	9.76768	0	0	0	20.08	8.6764	0	18.1248	0	0	0	0	20.08	1	8.99019	0	0	0	0	26.8361	2	1	4.4951	2.2764	0.25	0	0	0	0	0	0	1	0	0	0	-2.43061	1	0.75136	0	0	0	1	1	3.57143	4.84615	0	0	1
569	0	12.8514	0	0	11.6326	55.56	4.50635	0	24.8561	0	0	1	0	55.56	1	16.4779	0	0	1	0	72.1663	4	1	4.63257	3.51603	-2.25	0	0	0	0	0	0	1	0	0	0	-2.21926	2	0.755967	3	0	0	2	2	5.40541	5.77941	0	0	4
571	22.7278	8.26446	0	0	11.1484	65.01	0.00183852	1	18.2537	1	0	0	0	65.01	3	19.6382	0	1	0	0	91.3348	6	0	4.57019	4.10991	-5.5	0	1	0	1	0	0	1	0	0	0	-0.718813	2	0.635728	2	3	0	1	4	8.69565	7.20513	0	0	6
572	22.7278	8.22003	0	0	11.1554	65.01	0.00183852	1	18.2537	1	0	0	0	65.01	3	19.6746	0	1	0	0	91.3348	6	0	4.57102	4.10991	-5.5	0	1	0	1	0	0	1	0	0	0	-0.73917	2	0.63231	2	3	0	1	4	8.69565	7.20513	0	0	6
574	92.49	30.1719	0	0	12.2645	52.65	15.5121	1	54.909	0	0	1	1	52.65	2	35.6916	0	1	0	1	89.5093	7	2	5.74073	9.13132	-3.75	0	0	0	0	0	0	1	1	1	1	-5.16895	2	1.00573	2	1	0	5	3	3.63636	10.2828	0	0	6
575	0	42.1563	0	0	12.8058	103.17	17.0843	0	66.5008	1	0	1	1	103.17	1	33.1052	0	1	0	0	139.921	8	0	5.80579	9.4288	-10.75	0	0	0	0	0	0	1	1	0	0	-4.99616	2	1.23989	3	2	0	5	6	2.7027	10.205	0	0	8
576	66.943	18.1241	0	0	11.3534	44.81	3.49263	2	33.6391	0	0	1	0	44.81	1	14.9807	0	1	1	0	60.4042	5	1	4.35337	6.97102	-5.25	1	0	0	1	0	0	1	1	0	0	-3.00886	2	0.906203	3	1	0	4	3	4.87805	10.0737	0	0	5
577	0	32.5446	1	0	10.8185	102.29	12.3538	0	61.9021	0	0	0	1	102.29	2	45.0685	0	0	1	0	168.656	7	2	5.12597	8.1145	-2.5	0	0	0	0	0	8.88425	0	1	0	0	-4.72041	7	0.986201	10	0	1	13	0	10.4478	10.0076	0	1	7
578	0	30.6472	0	0	11.2873	119.68	5.06809	0	62.5811	1	0	1	1	119.68	6	52.0207	0	0	1	0	152.047	9	1	5.90799	8.4563	-3.75	0	0	0	0	0	0	1	1	0	0	-3.51777	7	1.02157	8	0	1	19	2	12.5	8.51954	0	0	8
579	0	4.99674	0	0	0	0	5.85009	0	6.37132	0	0	0	0	0	0	10.7824	0	0	0	0	14.9601	4	0	3.10417	0	-3.5	0	0	0	0	0	0	0	0	0	0	-2.56416	0	0.832789	0	0	0	0	0	0	1.86667	0	0	1
580	0	12.0006	0	0	10.828	75.27	0.0261831	0	21.2054	0	0	0	0	75.27	3	25.917	0	1	0	0	111.456	5	0	4.56528	4.0904	-4.25	0	2	0	1	0	0	1	0	0	0	-1.38572	3	0.857186	3	1	0	2	2	10.7143	4.98901	0	0	5
582	0	18.7586	0	0	12.2481	55.56	6.84301	0	32.9597	0	0	1	0	55.56	1	22.1121	0	0	0	0	72.1663	5	1	5.24809	4.74867	-3.5	0	0	0	0	0	0	1	1	0	0	-3.1517	2	0.93793	3	0	0	3	2	4.65116	6.38947	0	0	4
583	0	26.2592	0	0	13.1598	48.91	12.4297	0	59.7815	0	0	1	1	48.91	1	31.2404	0	1	0	0	77.2634	7	2	6.15976	9.19678	-0.25	0	0	0	0	0	0	1	1	0	1	-4.81398	2	0.820599	3	1	0	3	4	3.38983	9.73589	1	0	7
584	0	14.7668	0	0	11.0397	78.49	8.79056	0	41.392	0	0	1	0	78.49	4	40.9187	0	1	1	0	110.762	7	2	6.14099	6.51534	3.5	0	0	0	0	0	0	1	1	0	0	-3.98448	3	0.642036	1	0	0	5	3	8.57143	10.3162	0	0	6
585	22.7278	6.93956	0	0	11.1212	72.68	0.162213	1	18.2537	0	0	0	0	72.68	2	19.0189	1	1	0	0	88.2104	6	0	4.51315	4.10991	-2.5	0	1	0	1	0	0	1	0	0	0	-1.31511	2	0.533812	2	3	0	1	4	9.52381	7.20513	0	0	5
586	66.943	18.1241	0	0	11.3534	44.81	3.49263	2	33.6391	0	0	1	0	44.81	1	14.9807	0	1	1	0	60.4042	5	1	4.35337	6.97102	-5.25	1	0	0	1	0	0	1	1	0	0	-3.00886	2	0.906203	3	1	0	4	3	4.87805	10.0737	0	0	5
587	0	4.79317	0	0	10.3029	77.76	1.21744	0	14.3092	0	0	0	0	77.76	1	22.8944	0	0	1	0	153.195	4	1	3.30287	2.50549	2	0	0	0	0	0	8.41898	0	0	0	0	-1.73737	4	0.435742	4	0	3	0	0	23.5294	4.76364	0	2	4
588	0	19.108	0	0	0	3.24	24.8376	0	35.5751	0	0	1	0	3.24	1	6.70756	0	0	0	0	3.12431	1	2	0.714157	5.32389	0.75	0	0	0	0	0	0	1	0	0	0	-5.09424	0	0.868544	0	0	0	0	1	0	9.12987	0	0	1
589	0	24.0464	0	0	0	42.35	10.3875	0	41.1669	1	0	1	1	42.35	1	19.2585	0	0	0	0	70.4688	3	1	5.19352	8.16095	-3.25	0	0	0	0	0	11.1935	1	1	0	0	-4.48589	2	1.00193	3	0	0	4	1	4.08163	10.6159	0	0	3
590	0	4.36763	0	0	0	9.23	1.57929	0	9.21764	0	0	0	0	9.23	1	19.0928	0	0	0	0	55.8802	4	0	3.06986	0.353553	-3.75	0	0	0	0	0	0	0	0	0	0	-1.56076	1	0.545953	2	0	0	0	0	7.69231	2.53571	0	0	4
592	0	11.0968	1	0	10.9162	46.53	7.60543	0	25.7148	0	0	0	1	46.53	1	17.06	0	0	1	0	78.8282	3	2	3.91624	4.41532	2	0	0	0	0	0	8.96968	0	0	0	0	-3.35696	3	0.652751	4	0	0	5	0	9.67742	8.04412	0	0	3
594	0	4.22848	0	0	0	20.23	0.639938	0	5	0	0	0	0	20.23	0	5.04167	0	0	0	0	42.6833	1	0	2.52083	0	-2.25	0	0	1	0	0	8.52083	0	0	0	0	-0.996313	1	0.845697	1	0	0	0	0	6.66667	1.6	0	0	1
597	22.5441	17.9198	0	0	12.9086	37.91	8.3365	1	39.1769	1	0	1	0	37.91	2	15.7119	0	1	0	0	46.28	4	2	5.90864	9.19014	-0.25	0	0	0	0	0	0	1	0	0	0	-3.65344	1	0.779123	1	1	0	2	3	2.43902	17.7905	1	0	3
599	35.3102	9.17442	0	0	0	36.42	7.07449	1	18.7406	0	0	0	0	36.42	1	12.2051	0	0	0	0	52.807	5	1	1.87025	4.56323	-1.5	0	0	0	0	0	0	1	0	0	0	-3.28896	0	0.655315	0	3	0	0	3	0	6.31868	0	0	3
600	0	6.40145	0	0	0	9.23	2.51893	0	13.621	0	0	0	0	9.23	0	35.9369	0	0	0	0	100.761	7	0	3.33333	0	-6.5	0	0	0	0	0	0	0	0	0	0	-2.32874	1	0.640145	2	0	0	0	0	8.33333	2.73333	0	0	7
601	26.0134	9.82479	0	0	0	43.84	5.6539	1	19.2408	0	0	1	0	43.84	0	12.4319	1	0	0	0	49.5602	5	1	1.80129	4.44295	-1	0	0	0	0	0	0	1	0	0	0	-3.07018	0	0.70177	0	0	0	0	3	0	7.38462	0	0	2
603	0	6.40879	0	0	0	18.46	1.30099	0	10.8262	0	0	0	0	18.46	2	7.28484	0	0	0	0	21.9998	2	0	1.3962	1.20711	-3.5	0	0	0	0	0	0	0	0	0	0	-1.12289	2	0.640879	4	0	1	2	0	8.33333	3.66667	0	0	2
604	0	2.81812	0	0	0	9.23	0.915736	0	6.60412	0	0	0	0	9.23	2	12.46	0	0	0	0	40.9201	3	0	2.85458	0.353553	-2	0	0	0	0	0	0	0	0	0	0	-1.01145	1	0.402589	2	0	0	0	0	9.09091	2.66667	0	0	3
606	0	23.6322	0	0	11.8626	45.48	17.4301	0	47.881	1	0	1	1	45.48	3	21.7681	0	0	1	0	57.2799	5	2	4.86264	8.50771	-0.75	0	0	0	0	0	0	1	1	0	0	-4.98195	2	0.844006	3	0	0	5	2	3.92157	11.4233	0	0	4
609	0	5.74375	0	0	0	0	10.6203	0	10.4135	0	0	0	0	0	0	1.78944	0	0	0	0	0	0	1	0.203704	1.81676	1.5	0	0	0	0	0	0	0	0	0	0	-3.15212	0	0.638195	0	0	0	0	0	0	4.5	0	0	0
610	37.0637	9.16658	0	1	0	36.42	7.07449	1	18.5384	0	0	0	0	36.42	1	11.8153	0	0	0	0	52.807	5	1	1.86712	4.43318	-1.5	0	0	0	1	0	0	1	0	0	0	-3.26168	0	0.654756	0	3	0	0	3	0	6.18681	0	0	3
612	0	6.62841	0	0	0	9.23	2.51893	0	7.84027	0	0	0	0	9.23	0	3.70833	0	0	0	0	10.9999	1	0	1.58681	0.25	-3.5	0	0	0	0	0	0	0	0	0	0	-1.60398	1	0.946916	2	0	0	0	0	4.7619	2.09524	0	0	1
613	0	6.28247	0	0	0	0	15.588	0	14.5315	0	0	0	0	0	0	25.8256	0	0	0	0	44.8803	4	1	3.87649	1.59341	-0.5	0	0	0	0	0	0	0	0	0	0	-3.83382	0	0.571134	0	0	0	0	0	0	4.50909	0	0	3
616	59.6002	22.1916	0	0	12.3514	75.71	6.55135	1	47.0197	0	0	1	1	84.09	3	39.4529	0	1	1	0	99.9871	7	2	5.49205	10.2108	-0.25	0	0	0	0	0	0	1	1	0	0	-3.80182	4	0.821912	3	0	0	4	2	8.16327	12.2479	0	0	6
617	0	13.6173	0	0	10.8975	75.27	0.216408	0	23.1179	0	0	0	0	75.27	3	26.5198	0	1	0	0	111.456	5	0	4.68121	4.13085	-4.75	0	2	0	1	0	0	1	0	0	0	-1.63586	3	0.907817	3	1	0	4	2	9.67742	5.18095	0	0	5
618	0	26.6951	0	0	12.0871	42.31	9.42365	0	49.8447	1	1	1	1	78.93	2	23.2001	0	0	1	0	50.5616	6	2	5.08712	9.73037	-1	0	0	0	0	0	0	1	1	0	0	-5.06044	2	0.988708	0	0	0	4	2	3.77358	12.963	0	0	4
619	0	16.1677	0	0	11.0667	75.27	0.89745	0	28.3757	0	0	0	0	75.27	4	29.3149	0	1	0	0	111.456	5	0	5.00274	5.07322	-4.75	0	2	0	1	0	0	1	0	0	0	-1.97237	3	0.951039	3	1	0	5	2	8.57143	5.22059	0	0	5
620	0	16.1677	0	0	11.0667	75.27	0.89745	0	28.3757	0	0	0	0	75.27	4	29.3149	0	1	0	0	111.456	5	0	5.00274	5.07322	-4.75	0	2	0	1	0	0	1	0	0	0	-1.97237	3	0.951039	3	1	0	5	2	8.57143	5.22059	0	0	5
622	0	13.6557	0	0	0	29.26	15.7388	0	29.866	0	1	1	0	54.56	0	14.5345	0	0	0	0	50.9816	4	2	5.04166	5.47761	1.75	0	0	0	0	0	0	1	0	0	1	-4.11747	0	0.718724	0	0	0	0	2	0	7.61404	0	0	3
623	19.7813	18.6529	0	0	0	41.93	2.84905	1	32.9239	2	0	1	0	41.93	1	18.4539	0	0	0	0	67.8074	4	1	4.05591	7.67345	-5.5	0	0	0	0	0	10.0559	1	0	0	0	-2.78784	3	0.932646	5	0	0	8	1	7.69231	13.4789	0	0	4
624	0	15.8771	0	0	0	50.7	17.6042	0	41.4123	0	0	1	0	50.7	0	13.4921	0	0	0	0	68.1223	5	2	1.8362	7.81103	6.75	0	0	0	0	0	0	1	0	0	0	-5.29424	0	0.635082	0	1	0	0	4	0	11.02	0	0	4
625	0	7.14209	0	0	0	9.23	3.12033	0	13.7113	0	0	0	0	9.23	0	33.0529	0	0	0	0	85.8005	7	0	3.58796	0.53033	-6.5	0	0	0	0	0	0	0	0	0	0	-2.63088	1	0.714209	2	0	0	0	0	8.33333	2.66667	0	0	6
627	0	6.6985	0	0	0	9.23	2.51893	0	7.77542	0	0	0	0	9.23	0	3.78125	0	0	0	0	10.9999	1	0	1.72917	0.75	-3.5	0	0	0	0	0	0	0	0	0	0	-1.56352	1	0.956929	2	0	0	0	0	4.7619	2.19048	0	0	1
628	43.1225	23.4849	0	0	0	12.03	19.7895	1	38.1546	0	1	1	0	37.33	0	7.79983	0	0	0	0	18.0108	2	2	0.795776	8.25192	-0.5	0	0	0	0	0	0	1	0	0	0	-4.82402	0	1.0675	0	0	0	0	1	0	8.4632	0	0	1
629	0	22.3065	0	0	0	12.47	13.211	0	32.5962	1	0	0	0	12.47	0	7.58465	0	0	0	0	14.1242	2	1	2.00506	7.41843	-6.25	0	0	0	0	0	0	1	0	0	0	-4.17232	1	1.11532	2	0	0	4	1	2.22222	13.0105	0	0	2
630	65.06	22.2583	0	0	0	50.53	10.5785	1	43.0411	0	0	1	1	50.53	0	15.458	1	1	0	0	58.4278	5	2	2.42317	7.90891	-2.75	0	0	0	0	5.65308	0	1	1	0	0	-4.51644	2	0.824381	4	1	0	2	3	3.7037	11.3219	0	0	5
631	48.8418	20.3229	0	0	12.4239	62.3	2.01492	1	35.3422	5	0	1	1	62.3	1	27.7	0	0	1	0	92.9524	5	1	5.42388	7.46108	-7.25	0	0	0	0	0	9.55779	1	1	0	0	-2.21124	4	0.923769	6	0	1	8	1	9.30233	8.59307	0	0	5
633	172.683	27.1907	0	0	0	54.69	16.268	2	58.107	0	0	1	1	54.69	0	15.6758	2	0	0	0	65.706	6	2	2.45273	10.3112	-0.5	0	0	0	0	0	0	1	0	0	0	-5.54777	1	0.84971	2	2	0	1	5	1.63934	12.0363	0	0	5
634	0	8.22088	0	0	0	0	22.6534	0	22.3361	0	0	0	0	0	0	3.71593	0	0	0	0	0	0	4	0.212407	6.28459	6.5	0	0	0	0	0	0	0	0	0	0	-4.72869	0	0.513805	0	0	0	0	0	0	13.0333	0	0	0
636	88.5941	28.1434	0	0	0	76.89	16.4003	1	59.1619	2	0	1	1	76.89	0	41.3586	0	0	0	0	141.646	10	2	5.2012	8.72318	-3.5	0	0	0	0	0	0	1	1	0	1	-4.79736	1	0.907851	2	3	0	3	6	1.85185	11.0043	0	0	9
638	88.4066	26.3113	0	0	12.2439	52.65	11.2747	1	51.8676	0	0	1	1	52.65	2	34.1292	0	1	0	0	89.5093	6	2	5.68306	8.64629	-3.25	0	0	0	0	0	0	1	1	0	1	-4.21707	2	0.907285	2	1	0	5	3	3.63636	10.1305	0	0	6
639	0	16.8435	0	0	0	32.7	4.2796	0	27.1237	2	0	0	0	32.7	0	13.9927	0	0	0	0	56.8075	3	1	3.67862	5.88095	-5	0	0	0	0	0	9.67862	1	1	0	0	-3.16607	2	0.93575	3	0	1	3	1	5.12821	11.549	0	1	3
640	0	5.65911	0	0	0	0	5.85009	0	8.3094	0	0	0	0	0	0	22.5382	0	0	0	0	59.8405	5	0	3	0	-4	0	0	0	0	0	0	0	0	0	0	-2.72865	0	0.808444	0	0	0	0	0	0	2	0	0	4
642	0	6.32435	0	0	11.0929	52.32	3.17888	0	15.297	0	0	1	0	52.32	1	13.6593	0	0	1	0	69.042	3	1	4.09294	2.54594	1	0	0	0	0	0	0	1	0	0	0	-1.98347	2	0.527029	3	0	0	0	1	8.69565	4.83333	0	0	3
644	0	5.67103	0	0	10.0963	26.3	1.88602	0	8.40873	0	0	0	0	26.3	1	8.59741	0	0	1	0	36.1448	2	0	3.09635	0.802586	-2.75	0	0	0	0	0	0	0	0	0	0	-1.29324	2	0.708879	3	0	0	1	0	10	2.82143	0	0	2
645	32.9189	21.736	0	0	0	23.96	9.35788	1	35.855	1	0	1	0	56.05	2	12.6003	0	0	0	0	24.2594	5	1	2.14836	7.28205	-4.75	0	0	0	1	0	0	1	0	0	0	-4.50632	0	1.03505	0	1	0	0	3	0	10.9143	0	0	3
647	46.0222	10.5231	0	0	0	30.71	18.1666	1	23.0315	0	0	1	0	30.71	1	14.5415	0	0	0	0	33.4485	6	1	1.98914	5.72012	1	0	0	0	0	0	0	1	0	0	0	-4.32437	0	0.657691	0	2	0	0	3	0	6.28333	0	0	2
648	0	34.788	0	0	11.2767	78.01	14.84	0	60.1065	0	1	1	1	103.31	3	48.1622	0	1	0	0	144.641	11	0	5.34	8.01911	-10	0	0	0	1	0	0	1	1	0	1	-4.66877	1	1.12219	1	3	0	1	6	1.72414	9.83656	0	0	10
650	30.3859	25.6459	0	0	0	19.03	12.3107	1	36.2326	1	1	1	0	44.33	0	7.29988	1	0	0	0	3.12431	3	1	0.990187	8.30282	-5.75	0	0	0	0	0	0	1	0	0	0	-4.33872	0	1.16572	0	0	0	0	2	0	13.4199	0	0	1
651	30.3859	25.6459	0	0	0	19.03	12.3107	1	36.2326	1	1	1	0	44.33	0	7.29988	1	0	0	0	3.12431	3	1	0.990187	8.30282	-5.75	0	0	0	0	0	0	1	0	0	0	-4.33872	0	1.16572	0	0	0	0	2	0	13.4199	0	0	1
652	0	23.2936	0	0	13.4668	41.99	23.9624	0	54.4881	1	0	1	0	41.99	1	18.7052	0	1	0	0	59.9412	3	3	6.46677	9.33225	6.25	0	0	0	0	0	0	1	0	0	0	-6.09314	1	0.803226	1	0	0	5	2	1.88679	11.0788	0	0	3
653	0	16.7052	0	0	0	50.28	6.7551	0	33.7523	0	0	1	1	50.28	0	12.1715	0	0	0	0	65.461	5	1	1.85422	6.10762	-1.75	0	0	0	0	0	0	1	1	0	0	-3.31715	1	0.759327	2	1	0	0	4	2.27273	8.54978	0	0	5
654	220.388	34.0568	0	0	12.7883	59.39	24.1357	2	64.858	0	0	1	1	59.39	1	26.3385	1	1	0	0	73.9429	7	2	5.78832	9.8257	-3	0	0	0	0	0	0	1	1	0	0	-6.07325	2	1.00167	3	1	0	6	4	2.98507	10.9037	0	0	5
657	30.8198	9.2791	0	0	0	48.14	3.74899	1	21.8141	0	1	1	0	76.38	0	28.4841	1	0	0	0	105.563	7	1	3.88749	4.30637	-1	0	0	0	0	0	0	1	0	0	0	-3.5676	1	0.618606	2	1	0	0	2	5	7.22857	0	0	6
658	0	0.333333	0	0	0	0	0.489372	0	1	0	0	0	0	0	1	0	0	0	0	0	0	0	0	0	0	0.5	0	0	0	0	0	0	0	0	0	0	-0.788884	0	0.166667	0	0	0	0	0	0	1	0	0	0
660	20.8096	20.744	0	0	0	41.93	3.72931	1	35.7646	2	0	1	0	41.93	1	19.1555	0	0	0	0	67.8074	4	1	3.97287	7.77215	-6	0	0	0	0	0	9.97287	1	0	0	0	-2.99738	3	0.987811	5	0	0	7	1	7.14286	14.0048	0	0	4
661	20.8096	20.744	0	0	0	41.93	3.72931	1	35.7646	2	0	1	0	41.93	1	19.1555	0	0	0	0	67.8074	4	1	3.97287	7.77215	-6	0	0	0	0	0	9.97287	1	0	0	0	-2.99738	3	0.987811	5	0	0	7	1	7.14286	14.0048	0	0	4
662	67.1383	29.2173	0	0	0	46.18	7.66715	1	50.0984	3	1	1	1	74.42	0	16.2707	1	0	0	0	63.8069	5	2	2.63733	9.46949	-3	0	0	0	0	0	0	1	1	0	0	-4.78113	1	1.04347	2	0	0	3	3	1.75439	11.5	0	0	4
663	25.5532	6.57267	0	0	0	24.92	0.939128	1	12.3985	1	0	0	0	24.92	0	4.31407	0	0	0	0	34.7963	2	0	1.08926	3.03437	-1	0	0	0	0	0	0	1	0	0	0	-1.79057	0	0.597515	0	0	0	0	2	0	5.76364	0	0	2
664	19.302	23.2261	0	0	12.6218	38.77	4.70331	1	38.4133	2	0	0	0	38.77	1	22.6249	0	0	0	0	50.269	4	1	5.62181	9.35335	-6.5	0	0	0	0	0	0	1	0	0	0	-3.24624	3	1.05573	5	0	0	8	1	6.97674	15.5065	0	0	4
665	138.833	24.7413	0	0	0	38.88	17.9111	2	51.5587	1	0	1	0	38.88	0	19.8744	1	0	0	0	51.533	6	2	5.33219	9.35771	-1	0	0	0	0	0	0	1	0	0	1	-5.40493	0	0.853149	0	3	0	0	5	0	11.7438	0	0	4
666	0	6.48871	0	0	0	32.26	0.939128	0	13.0716	1	0	0	0	32.26	0	8.37176	0	0	0	0	60.6941	2	1	3.49884	3.25998	-0.75	0	0	0	0	0	9.49884	1	0	0	0	-1.7162	1	0.589883	1	0	0	0	1	4.54545	7.74545	0	0	2
667	25.5532	6.57267	0	0	0	24.92	0.939128	1	12.3985	1	0	0	0	24.92	0	4.31407	0	0	0	0	34.7963	2	0	1.08926	3.03437	-1	0	0	0	0	0	0	1	0	0	0	-1.79057	0	0.597515	0	0	0	0	2	0	5.76364	0	0	2
668	35.3102	12.1569	0	1	0	36.42	8.6485	1	18.7406	0	0	0	0	36.42	1	8.20688	0	0	0	0	52.807	5	1	1.26596	5.37631	-1	0	0	0	1	0	0	1	0	0	0	-3.94944	0	0.868349	0	3	0	0	3	0	6.31868	0	0	3
669	0	5.6501	0	0	0	0	6.78141	0	6.37132	0	0	0	0	0	0	7.97377	0	0	0	0	0	4	0	1.0054	0	-3.5	0	0	0	0	0	0	0	0	0	0	-2.82903	0	0.941684	0	0	0	0	0	0	1.86667	0	0	0
670	0	14.7598	0	0	11.8923	32.34	6.35149	0	26.1607	0	0	1	0	32.34	1	11.3606	0	1	0	0	46.28	3	1	4.89232	3.9673	-2	0	0	0	0	0	0	1	0	0	0	-2.93455	1	0.868222	1	0	0	1	2	2.5641	5.86765	0	0	3
671	0	7.83118	0	0	0	0	8.74583	0	9.73929	0	0	0	0	0	0	20.8476	0	0	0	0	44.8803	5	0	3.19194	0	-4.5	0	0	0	0	0	0	0	0	0	0	-3.19097	0	0.978898	0	0	0	0	0	0	2.35714	0	0	3
672	0	9.26757	0	0	0	0	10.8298	0	11.2229	0	0	0	0	0	0	22.2826	0	0	0	0	44.8803	5	0	3.3365	1.01036	-5	0	0	0	0	0	0	0	0	0	0	-3.48274	0	1.02973	0	0	0	0	0	0	2.72222	0	0	3
673	0	16.9158	0	0	11	75.27	1.07683	0	26.9034	0	0	1	1	75.27	3	27.5672	0	1	0	0	111.456	5	0	4.83908	4.50585	-5.75	0	2	0	1	0	0	1	1	0	0	-2.12821	3	0.995045	3	1	0	4	2	8.10811	5.66176	0	0	5
675	0	5.23739	0	0	0	9.23	1.46265	0	6.37132	0	0	0	0	9.23	0	3	0	0	0	0	10.9999	1	0	1.4375	0	-3	0	0	0	0	0	0	0	0	0	0	-1.32103	1	0.872898	2	0	0	0	0	5.55556	1.86667	0	0	1
676	74.4941	23.7497	0	0	0	46.18	7.53272	1	46.1699	2	1	1	1	74.42	0	14.0618	0	0	0	0	63.8069	5	2	2.09642	8.96147	-0.5	0	0	0	0	0	0	1	1	0	0	-4.42324	1	0.879618	2	0	0	2	3	1.92308	10.2877	0	0	4
678	118.611	23.4429	0	0	0	46.84	29.2809	2	50.8568	0	0	1	0	46.84	0	44.2965	0	0	0	0	98.2387	10	1	4.88844	8.98673	-2.25	0	0	0	0	0	0	1	0	0	1	-6.34082	0	0.868255	0	3	0	0	5	0	10.6296	0	0	7
679	74.7382	27.0416	0	0	12.4707	48.99	20.4357	1	51.2391	1	0	1	1	48.99	3	23.0185	0	1	0	0	63.0655	5	2	5.47066	10.0184	-1.75	0	0	0	0	0	0	1	1	0	0	-5.70525	1	0.93247	1	1	0	2	3	1.88679	11.6429	0	0	4
680	0	36.9612	0	0	12.7308	103.17	13.8482	0	60.7804	0	0	1	1	103.17	1	31.5986	0	1	0	0	139.921	8	0	5.73083	8.90301	-9.75	0	0	0	0	0	0	1	1	0	0	-4.48863	2	1.15504	3	2	0	5	6	2.94118	9.91331	0	0	8
681	0	30.267	0	0	0	24.5	19.7692	0	57.9238	2	0	1	1	24.5	0	13.789	0	0	0	0	32.135	3	3	2.10969	10.3098	-0.75	0	0	0	0	0	0	1	1	0	0	-5.45465	1	0.976353	2	0	0	2	2	1.5873	10.5978	0	0	3
682	0	4.77935	0	0	0	0	6.04724	0	6.13077	0	0	0	0	0	1	7.06173	0	0	0	0	0	4	0	0.882716	0	-2.5	0	0	0	0	0	0	0	0	0	0	-2.88943	0	0.796558	0	0	0	0	0	0	1.93333	0	0	0
685	60.5423	25.5	0	0	12.4933	55.43	14.1328	1	54.3291	0	0	1	1	55.43	3	19.3197	1	1	0	0	64.597	6	1	5.49334	9.75739	-1	0	0	0	0	0	0	1	1	0	0	-4.86274	1	0.850001	1	0	0	4	5	1.81818	12.1931	0	0	5
687	51.7342	22.3507	0	0	0	42.52	7.19919	1	41.5125	2	0	1	1	42.52	0	15.4329	0	0	0	0	58.0213	4	2	2.36927	7.97718	-3	0	0	0	0	0	0	1	1	0	0	-3.85511	2	0.894026	4	0	1	4	2	3.92157	11.0067	0	0	4
689	0	16.4823	0	0	0	21.26	15.303	0	31.7669	0	0	1	0	21.26	0	12.4255	0	0	0	0	29.0106	3	2	2.66293	7.25695	-0.25	0	0	0	0	0	0	1	0	0	0	-4.76533	1	0.824116	2	0	0	0	1	2.77778	15.3316	0	0	2
690	44.0041	18.2582	0	0	0	29.85	13.0972	1	37.2603	0	0	1	0	29.85	0	17.1712	1	0	0	0	49.7564	4	2	5.16112	7.19622	-1	0	0	0	0	0	0	1	0	0	1	-4.43916	0	0.793836	0	1	0	0	3	0	10.5455	0	0	3
691	0	4.45078	0	0	0	0	1.86016	0	9.94949	0	1	0	0	0	0	22.1667	0	0	0	0	87.0087	7	0	1.84722	0	-4.5	0	0	0	0	0	0	0	0	0	0	-2.39168	0	0.635826	0	0	0	0	0	0	1.71429	0	0	6
692	0	4.20909	0	0	0	0	8.6534	0	8.47401	0	0	0	0	0	0	1.19444	0	0	0	0	0	0	1	0.12037	1.50166	2	0	0	0	0	0	0	0	0	0	0	-2.84299	0	0.526136	0	0	0	0	0	0	4.42857	0	0	0
694	30.2555	29.4245	0	0	11.8018	37.3	14.6424	1	38.1383	0	0	0	1	37.3	2	23.537	0	0	0	0	67.8283	2	0	4.80185	8.07895	-8.5	0	0	1	0	0	10.7461	0	1	0	0	-4.4463	2	1.33748	2	0	0	6	0	4.16667	14.2597	0	0	2
695	31.9035	32.9689	0	0	11.8529	37.3	16.3987	1	42.1318	0	0	0	1	37.3	2	24.8914	0	0	0	0	67.8283	2	0	5.00536	8.47769	-9	0	0	1	0	0	11.0054	0	1	0	0	-4.73562	2	1.43343	2	0	0	6	0	3.92157	14.2727	0	0	2
696	31.9035	32.9689	0	0	11.8529	37.3	16.3987	1	42.1318	0	0	0	1	37.3	2	24.8914	0	0	0	0	67.8283	2	0	5.00536	8.47769	-9	0	0	1	0	0	11.0054	0	1	0	0	-4.73562	2	1.43343	2	0	0	6	0	3.92157	14.2727	0	0	2
697	0	6.98396	0	0	10.1847	26.3	2.98096	0	9.84231	0	0	0	0	26.3	1	9.01698	0	0	1	0	36.1448	2	0	3.18468	0.979363	-3.25	0	0	0	0	0	0	0	0	0	0	-1.55491	2	0.775995	3	0	0	1	0	8.69565	3.16667	0	0	2
698	0	28.7913	0	0	0	42.52	10.3863	0	54.3693	3	0	1	1	42.52	0	37.9786	0	0	0	0	102.902	7	2	4.62196	7.26991	-5.25	0	0	0	0	0	0	1	1	0	1	-5.22243	2	0.992803	4	0	1	5	2	3.57143	10.0148	0	0	7
700	39.488	12.5945	0	1	0	36.42	11.1946	1	21.2061	0	0	0	0	36.42	1	13.5919	0	0	0	0	52.807	6	1	1.94239	6.26595	-2	0	0	0	1	0	0	1	0	0	0	-4.23219	0	0.839632	0	3	0	0	3	0	6.31429	0	0	3
701	0	9.02639	0	0	11.3678	52.32	5.6539	0	18.6772	0	0	1	0	52.32	1	14.8907	0	0	1	0	69.042	3	1	4.36776	2.80691	0	0	0	0	0	0	0	1	0	0	0	-2.46897	2	0.644742	3	0	0	1	1	6.89655	5.2967	0	0	3
702	0	16.7683	0	0	0	43.71	5.49105	0	37.8116	0	0	1	1	43.71	2	13.7853	0	0	0	0	55.5708	4	1	1.99352	6.7058	1.5	0	0	0	0	0	0	1	1	0	0	-3.876	2	0.729058	4	0	0	3	2	4.65116	9.11462	0	0	4
703	0	7.44644	0	0	0	0	12.6897	0	12.4256	0	0	0	0	0	0	2.4512	0	0	0	0	0	0	1	0.224537	1.96861	1	0	0	0	0	0	0	0	0	0	0	-3.25333	0	0.744644	0	0	0	0	0	0	4.4	0	0	0
704	33.5259	22.7817	0	0	13.0411	54.26	4.98674	1	41.7112	0	1	1	0	82.5	2	18.6125	1	1	0	0	67.8439	7	0	6.04108	9.23924	-4.5	0	0	0	0	0	0	1	0	0	0	-3.95782	1	0.949238	1	1	0	4	5	2.22222	12.3587	0	0	6
705	46.3081	20.1318	0	0	0	21.06	14.778	1	40.253	0	0	1	0	21.06	0	16.6525	1	0	0	0	34.87	4	2	5.20692	7.5038	-1.75	0	0	0	0	0	0	1	0	0	1	-4.76805	0	0.838825	0	1	0	0	3	0	10.7138	0	0	3
706	0	10.0763	0	0	11.7015	41.99	7.20385	0	27.466	0	0	1	0	41.99	1	33.2029	0	1	0	0	89.8614	6	1	4.94645	4.15292	2.5	0	0	0	0	0	0	1	0	0	1	-3.73614	1	0.559796	1	0	0	1	2	4	6.81699	0	0	5
707	74.4647	19.9478	0	0	0	37.39	8.37989	1	34.4007	0	1	1	0	65.63	0	10.9053	0	0	0	0	48.9205	5	1	2.37973	6.69201	-3.75	0	0	0	0	0	0	1	0	0	0	-3.79391	1	0.867295	2	1	0	2	3	2.08333	9.09486	0	0	4
709	0	2.74149	0	0	0	0	8.12992	0	8.0229	0	0	0	0	0	1	1.34519	0	0	0	0	0	0	1	0.630926	1.59539	3.5	0	0	0	0	0	0	0	0	0	0	-2.61869	0	0.342686	0	0	0	0	0	0	4.42857	0	0	0
710	0	25.0563	0	0	12.3454	29.54	18.4724	0	46.9281	0	0	1	0	29.54	1	17.7156	0	0	1	0	39.2691	3	2	5.34536	6.56255	-1	0	0	0	0	0	0	1	0	0	0	-4.44999	2	1.00225	3	0	0	5	1	3.7037	6.30667	0	0	3
712	0	41.0376	0	0	0	24.5	27.1701	0	71.5728	2	0	1	1	24.5	0	16.7743	0	0	0	0	32.135	3	3	2.27736	11.1121	-2.75	0	0	0	0	0	0	1	1	0	0	-6.46706	1	1.1725	2	0	0	5	2	1.33333	11.0824	0	0	3
713	39.488	11.2078	0	1	0	36.42	10.2966	1	21.2061	0	0	0	0	36.42	1	15.4493	0	0	0	0	52.807	6	1	1.88795	5.77632	-2.25	0	0	0	1	0	0	1	0	0	0	-3.88913	0	0.747185	0	3	0	0	3	0	6.31429	0	0	3
715	60.5161	24.3871	0	0	0	46.18	5.45379	1	44.4456	2	1	1	1	74.42	0	14.5345	1	0	0	0	63.8069	5	2	2.13733	9.07531	-2	0	0	0	0	0	0	1	1	0	0	-4.28027	1	0.937965	2	0	0	3	3	1.96078	11.1169	0	0	4
717	0	34.4464	0	0	12.9426	26.79	16.8003	0	58.8784	1	0	1	0	26.79	1	26.4326	0	1	0	0	49.478	5	2	5.9426	9.15984	-6.75	0	0	0	0	0	0	1	1	0	0	-5.02641	1	1.07645	1	0	0	3	3	1.47059	11.5746	0	0	5
718	51.7668	21.7324	0	0	13.0814	54.34	7.77025	1	47.9381	0	0	1	0	62.72	2	34.7527	1	1	1	0	65.448	8	2	6.08136	10.5958	0.25	0	0	0	0	0	0	1	0	0	0	-4.93208	2	0.835863	0	0	0	2	3	4.65116	10.3446	0	0	4
719	14.015	5.81485	0	0	0	28.68	1.70342	1	16.136	0	0	0	0	28.68	0	4.4213	2	0	0	0	16.7855	2	1	1.07688	4.57417	3.5	0	0	0	0	0	0	1	0	0	0	-2.77165	0	0.447296	0	0	0	0	2	0	10.4487	0	0	1
720	0	11.2365	0	0	0	77.82	9.29271	0	26.1143	0	0	1	0	77.82	0	14.8574	0	0	0	0	99.3654	5	1	1.90375	5.15239	2.25	0	0	0	0	0	0	1	0	0	0	-3.54493	0	0.660972	0	4	0	0	4	0	6.82353	0	0	4
721	60.5161	22.8421	0	0	0	59.32	5.56805	1	44.4456	2	0	1	1	59.32	0	17.4969	1	1	0	0	73.3143	5	2	2.11322	8.31415	-2.5	0	0	0	0	5.61322	0	1	1	0	0	-3.95197	2	0.878544	4	0	0	3	3	3.92157	11.1169	0	0	5
722	0	15.6093	0	0	0	19.37	9.70043	0	31.7876	1	0	1	0	19.37	0	7.9202	0	0	0	0	23.0342	3	1	1.67909	7.04636	-1	0	0	0	0	0	0	1	0	0	0	-3.88842	0	0.780467	0	1	0	0	3	0	15.3316	0	0	3
724	0	11.8537	0	0	11.6727	41.46	9.68447	0	29.911	0	0	1	0	41.46	2	17.1166	0	1	0	0	59.9412	4	2	4.67269	6.37622	3.5	0	0	0	0	0	0	1	0	0	0	-4.00205	1	0.623877	1	0	0	3	2	3.33333	10.0351	0	0	3
726	0	18.4016	0	0	0	41.49	7.88554	0	35.7441	0	0	1	0	41.49	0	18.5912	0	0	0	0	71.694	3	2	5.44086	7.68866	-0.75	0	0	1	0	0	11.4409	1	0	0	0	-3.8667	2	0.876265	3	0	0	2	1	5	15.3381	0	0	3
728	0	16.9288	0	0	0	35.5	9.46252	0	33.9591	0	0	1	1	35.5	0	11.1246	0	0	0	0	63.8184	3	2	3.7689	6.38	0	0	0	0	0	0	9.7689	1	0	0	0	-3.85966	1	0.806136	1	0	0	3	2	2.32558	12.3619	0	1	3
729	0	7.6424	0	0	11.2518	52.32	4.35276	0	16.979	0	0	1	0	52.32	1	14.328	0	0	1	0	69.042	3	1	4.25183	2.6167	0.5	0	0	0	0	0	0	1	0	0	0	-2.23434	2	0.587877	3	0	0	0	1	7.69231	5.05128	0	0	3
730	0	15.0452	0	0	0	29.26	17.7532	0	32.0163	0	1	1	0	54.56	0	13.4672	0	0	0	0	50.9816	4	2	4.34817	5.9769	1.75	0	0	0	0	0	0	1	0	0	1	-4.45855	0	0.752262	0	0	0	0	2	0	7.6	0	0	3
731	0	7.40588	0	0	10.203	26.3	2.98096	0	10.3323	0	0	0	0	26.3	1	9.2363	0	0	1	0	36.1448	2	0	3.20302	0.934348	-3.25	0	0	0	0	0	0	0	0	0	0	-1.57429	2	0.822876	3	0	0	2	0	8.69565	3	0	0	2
732	19.302	24.7463	0	0	0	41.93	5.10343	1	38.4133	3	0	0	0	41.93	0	21.1445	0	0	0	0	67.8074	4	1	4.64102	9.35335	-8	0	0	0	0	0	10.641	1	0	0	0	-3.24024	3	1.12483	5	0	0	8	1	6.66667	15.5065	0	0	4
735	0	5.59792	0	0	0	12.03	3.42204	0	10.927	0	0	0	0	12.03	0	2.94704	0	0	0	0	18.0108	1	1	0.840926	2.85759	0	0	0	0	0	0	0	1	0	0	0	-2.15528	0	0.559792	0	0	0	0	1	0	7.66667	0	0	1
737	135.385	23.3729	0	0	0	71.64	8.1258	2	47.072	1	0	1	1	71.64	0	19.2215	1	0	1	0	70.7977	7	2	1.98611	9.21676	-3.25	0	0	0	0	0	0	1	1	0	0	-4.12926	3	0.834747	6	1	0	3	4	5.76923	11.9524	0	0	6
738	0	36.4126	0	0	11.9448	54.26	17.3932	0	63.3506	0	0	1	0	54.26	3	47.1706	0	1	0	0	112.969	9	0	5.36724	7.69346	-10.25	0	0	0	0	0	0	1	1	0	1	-5.03709	1	1.13789	1	2	0	1	5	1.5625	10.0423	0	0	9
739	37.314	23.6091	0	0	0	43.07	21.7961	1	40.006	2	0	1	0	43.07	1	19.0074	0	0	0	0	50.1115	6	1	2.38357	8.51494	-3.75	0	0	0	0	0	0	1	0	0	0	-5.13224	0	1.02648	0	2	0	0	4	0	12.4545	0	0	3
742	35.5203	18.5963	0	0	0	57.28	5.02249	1	37.567	2	0	1	0	57.28	0	24.052	2	0	0	0	86.6541	5	2	4.39638	6.40833	-2	0	0	0	0	0	9.97311	1	1	0	1	-3.40907	2	0.808535	3	0	0	6	2	4.54545	11.332	0	0	4
743	0	12.9003	0	0	11.7374	61.69	9.71043	0	32.7735	0	0	1	0	61.69	2	23.3962	0	1	0	0	102.625	5	2	4.73743	6.17463	2.75	0	0	0	0	0	9.79836	1	0	0	0	-3.85053	2	0.645013	2	0	0	7	2	6.45161	10.0474	0	0	4
744	0	14.0309	0	0	0	16.96	9.11498	0	28.5515	0	1	1	0	45.2	0	5.09504	0	0	0	0	21.1351	3	2	0.723342	6.87393	1.25	0	0	0	0	0	0	1	0	0	0	-3.94017	0	0.738467	0	0	0	0	2	0	11.5205	0	0	2
746	0	13.0475	0	1	0	36.42	8.67095	0	25.736	1	0	0	0	36.42	1	23.5704	0	0	0	0	82.7273	6	1	4.06319	5.10563	-3.25	0	0	0	1	0	0	1	0	0	0	-3.7688	0	0.7675	0	3	0	0	3	0	8.36765	0	0	5
747	0	30.199	0	0	0	43.7	10.6195	0	42.3288	1	0	0	1	43.7	0	20.4812	0	0	0	0	88.491	3	1	4.42675	7.77974	-7.75	0	0	1	0	0	10.0352	1	1	0	0	-4.03803	2	1.313	2	0	0	9	1	3.84615	10.9249	0	1	3
749	51.7597	20.1773	0	0	12.1885	55.84	5.82533	1	37.2369	3	0	1	0	55.84	2	28.7519	0	0	1	0	75.4139	5	1	5.29671	6.83828	-5.25	0	0	0	0	0	0	1	1	0	0	-2.96041	4	0.917151	6	0	0	4	1	9.30233	8.42857	0	0	5
750	0	16.6616	0	0	0	41.3	7.46653	0	36.1066	0	0	1	0	41.3	1	15.3822	0	0	0	0	48.9205	5	2	2.56297	7.44668	-0.5	0	0	0	0	0	0	1	0	0	0	-4.26489	1	0.757344	2	1	0	2	3	2.63158	13.0087	0	0	4
751	0	0.886358	0	0	0	0	0.00244626	0	1.91421	0	0	0	0	64.18	2	1.16667	0	0	0	0	0	2	0	0.291667	0	1	0	0	0	0	0	0	0	0	0	0	-1.117	0	0.295453	0	0	0	0	0	0	1.33333	0	0	0
752	0	6.70124	0	0	0	41.05	0.2443	0	14.158	0	0	1	0	41.05	0	6.71422	0	0	0	0	54.7061	4	0	1.18944	3.21114	-2.25	0	0	0	0	0	0	0	0	0	0	-1.25702	0	0.558437	0	3	0	0	4	0	6.27273	0	0	4
754	0	9.96261	0	0	11.3061	61.69	3.11895	0	22.3996	0	0	0	0	61.69	2	20.5577	0	1	0	0	102.625	5	1	4.30611	4.39996	-0.25	0	0	0	0	0	9.33704	1	0	0	0	-2.56548	2	0.664174	2	0	0	3	2	8.33333	8.68571	0	0	4
755	108.808	17.4825	0	0	11.3465	47.56	4.38448	2	30.6773	1	0	1	1	47.56	1	18.5648	0	1	0	0	65.1555	4	1	4.34646	5.9708	-4.25	0	0	0	0	0	0	1	1	0	0	-3.05652	3	0.874125	5	0	0	7	1	7.31707	7.61053	0	0	4
757	0	21.0005	0	0	0	32.7	6.56045	0	33.1029	0	0	0	0	32.7	0	14.6713	0	0	0	0	56.8075	3	1	5.10193	5.28297	-5.5	0	0	1	0	0	11.1019	1	1	0	0	-3.32867	2	1.05002	3	0	0	3	1	4.25532	6.31579	0	0	3
758	0	24.0523	0	0	0	42.52	7.80103	0	48.5651	2	0	1	1	42.52	0	35.9252	0	0	0	0	102.902	7	2	4.49373	6.89157	-4.25	0	0	0	0	0	0	1	1	0	1	-4.71839	2	0.890824	4	0	1	5	2	4	9.79487	0	0	7
760	0	18.9816	0	0	0	24.06	16.6618	0	25.9591	2	0	1	0	24.06	0	7.29731	0	0	0	0	36.0215	3	1	1.04398	4.13266	-2.5	0	0	0	0	0	0	1	0	0	0	-4.74957	0	1.11656	0	0	0	0	2	0	5.86765	0	0	2
761	0	15.6535	0	0	0	25.36	4.1394	0	32.3982	0	0	1	0	25.36	0	9.51905	0	0	0	0	30.9097	3	1	2.70838	5.1569	-0.25	0	0	0	0	0	0	1	0	0	0	-3.11899	1	0.782677	2	0	0	0	2	2.38095	6.38421	0	0	3
763	50.351	17.3777	0	0	0	23.78	8.79027	1	36.0396	0	0	1	0	23.78	0	9.20492	1	0	0	0	22.9116	5	1	1.85522	7.39766	-1	0	0	0	0	0	0	1	0	0	0	-4.33086	0	0.755551	0	0	0	0	4	0	10.0158	0	0	3
764	0	13.3285	0	0	0	77.82	12.8161	0	28.9765	0	0	1	0	77.82	0	18.6852	0	0	0	0	99.3654	6	1	1.91074	5.63981	1.5	0	0	0	0	0	0	1	0	0	0	-4.16422	0	0.740473	0	4	0	0	4	0	6.96732	0	0	4
765	0	10.8262	0	0	0	0	23.2657	0	10.8262	0	0	0	0	0	0	1.07954	0	0	0	0	0	0	0	0.269884	1.20711	-4.5	0	0	0	0	0	0	0	0	0	0	-3.42439	0	1.08262	0	0	0	0	0	0	3.66667	0	0	0
766	0	7.95768	0	0	0	0	17.664	0	7.95768	0	0	0	0	0	0	1.02359	0	0	0	0	0	0	0	0.255899	0.853553	-3.5	0	0	0	0	0	0	0	0	0	0	-2.92091	0	0.99471	0	0	0	0	0	0	3	0	0	0
767	0	19.4669	0	0	0	37.39	10.7069	0	36.5744	0	0	1	0	37.39	0	11.0098	0	0	0	0	48.9205	4	1	2.39485	6.29144	-2.25	0	0	0	0	0	0	1	0	0	0	-3.92972	1	0.811121	2	1	0	3	3	1.96078	9.53261	0	0	4
768	0	5.57703	0	0	0	12.03	4.4854	0	10.927	0	0	0	0	12.03	0	2.7787	0	0	0	0	18.0108	1	1	0.862593	2.85759	0.5	0	0	0	0	0	0	0	0	0	0	-2.5503	0	0.557703	0	0	0	0	1	0	7.66667	0	0	1
769	0	26.3612	0	0	0	31.64	6.93751	0	46.4617	0	1	1	0	59.88	0	14.8388	0	0	0	0	52.0563	6	2	3.07791	9.51052	-4.75	0	0	0	0	0	9.07791	1	1	0	0	-4.53335	1	0.976339	1	0	0	0	3	1.88679	12.9915	0	0	4
771	0	6.67662	0	0	0	0	9.89643	0	7.95768	0	0	0	0	0	1	1.77678	0	0	0	0	0	0	0	0.658321	0.853553	-2.5	0	0	0	0	0	0	0	0	0	0	-2.52207	0	0.834578	0	0	0	0	0	0	3	0	0	0
772	88.7905	35.5115	0	0	0	40.16	14.6494	1	58.5425	1	0	1	1	40.16	0	20.4206	0	0	1	0	47.1239	5	2	2.63747	10.3496	-7.25	0	0	0	0	0	0	1	1	0	0	-5.50733	4	1.10973	8	0	1	10	1	5.97015	11.1472	0	0	5
773	37.314	17.8961	0	0	0	30.18	19.2108	1	40.006	0	0	1	0	30.18	1	15.5515	1	0	0	0	33.5711	5	2	2.28958	8.51494	2.25	0	0	0	0	0	0	1	0	0	0	-5.53688	0	0.77809	0	1	0	0	3	0	12.4545	0	0	2
774	0	23.5695	0	0	0	16.96	14.713	0	39.7543	0	2	1	0	70.5	0	7.12955	0	0	0	0	21.1351	4	2	1.05315	8.91856	-1.25	0	0	0	0	0	0	1	0	0	0	-5.28639	0	0.982064	0	0	0	0	2	0	12.6957	0	0	2
775	44.0041	17.0096	0	0	0	39.08	6.66308	1	37.2603	1	0	1	0	39.08	0	20.7912	1	0	0	0	60.7563	5	2	5.14112	7.19622	-1.5	0	0	0	0	0	0	1	0	0	1	-3.83345	1	0.739547	2	1	0	4	3	2.43902	10.5455	0	0	4
776	31.6995	19.8672	0	0	0	35.16	3.61274	1	36.319	0	1	1	0	63.4	3	9.5468	0	0	0	0	41.0449	5	1	1.88165	8.09547	-3.5	0	0	0	0	0	0	1	0	0	0	-3.80363	0	0.903054	0	1	0	0	4	0	12.2554	0	0	4
778	187.362	29.521	0	0	13.2659	56.59	13.1577	2	61.663	0	1	1	1	84.83	2	29.1892	2	1	0	0	70.1789	8	2	6.26593	11.6803	-1	0	0	0	0	0	0	1	1	0	0	-5.92915	3	0.894575	5	1	0	6	3	5.26316	11.572	1	0	6
779	0	19.2702	0	0	0	56.84	9.0858	0	36.5484	0	0	1	1	56.84	1	38.1323	0	0	0	0	119.396	7	1	4.57384	3.86284	-5.75	0	0	0	0	0	0	1	1	0	1	-3.24118	2	0.875919	3	0	0	3	2	4.65116	6.25108	0	0	7
780	0	19.2702	0	0	0	56.84	9.0858	0	36.5484	0	0	1	1	56.84	1	38.1323	0	0	0	0	119.396	7	1	4.57384	3.86284	-5.75	0	0	0	0	0	0	1	1	0	1	-3.24118	2	0.875919	3	0	0	3	2	4.65116	6.25108	0	0	7
782	0	23.5893	0	0	0	16.96	14.713	0	39.7543	1	2	1	0	70.5	0	7.32693	0	0	0	0	21.1351	4	2	1.19317	8.91856	-1.25	0	0	0	0	0	0	1	0	0	0	-5.31979	0	0.982886	0	0	0	0	2	0	12.6957	0	0	2
783	0	18.3866	0	0	0	32.51	8.79027	0	38.9153	0	0	1	0	32.51	1	14.838	0	0	0	0	34.034	5	2	2.5893	7.59838	-1.25	0	0	0	0	0	0	1	0	0	0	-4.59677	1	0.799417	2	1	0	2	3	2.43902	13.0079	0	0	4
785	0	11.6676	0	0	0	77.82	10.9985	0	26.753	0	0	1	0	77.82	0	17.8972	0	0	0	0	99.3654	6	1	1.8503	5.49477	2	0	0	0	0	0	0	1	0	0	0	-3.92121	0	0.686328	0	4	0	0	4	0	6.79412	0	0	4
788	0	20.3225	0	0	0	32.7	9.24443	0	38.8069	0	0	1	0	32.7	0	18.0608	0	0	0	0	56.8075	3	2	5.57197	7.82747	-1.5	0	0	1	0	0	11.572	1	0	0	0	-4.19771	2	0.923748	3	0	0	3	1	4.65116	15.381	0	0	3
789	0	29.3278	0	0	12.4938	28.48	8.88099	0	52.5774	0	1	1	1	56.72	1	16.1039	0	0	0	0	34.5179	5	2	5.49384	9.71421	-4	0	0	0	0	0	0	1	1	0	0	-4.92975	1	1.0113	1	0	0	2	3	1.66667	13.2512	0	0	4
791	128.72	22.9102	0	0	0	62.41	13.03	2	44.7605	1	0	1	1	62.41	0	19.2761	1	0	1	0	59.7978	7	2	2.01771	9.19392	-3	0	0	0	0	0	0	1	1	0	0	-4.74567	2	0.848527	4	1	0	2	4	4.16667	11.8234	0	0	5
792	0	16.0025	0	0	12.3864	29.54	6.36227	0	28.3298	0	0	1	0	29.54	1	15.3055	0	0	1	0	39.2691	3	1	5.38644	5.00098	-3.5	0	0	0	0	0	0	1	0	0	0	-2.92841	2	0.889025	3	0	0	4	1	5.12821	6.06536	0	0	3
794	67.9828	31.9005	0	0	0	46.18	8.88099	1	53.6369	2	1	1	1	74.42	0	16.6847	1	0	0	0	63.8069	5	2	2.22295	9.58076	-3.5	0	0	0	0	0	0	1	1	0	0	-5.14538	1	1.10002	2	0	0	3	3	1.66667	11.3005	0	0	4
795	0	8.03117	0	0	0	0	19.1412	0	9.36685	0	0	0	0	0	1	1.85586	0	0	0	0	0	0	0	0.678479	1.03033	-3	0	0	0	0	0	0	0	0	0	0	-2.98639	0	0.892352	0	0	0	0	0	0	3.33333	0	0	0
796	0	7.02592	0	0	0	0	14.9718	0	7.02592	0	0	0	0	0	0	1.57083	0	0	0	0	0	0	0	0.273472	0.612372	-3	0	0	0	0	0	0	0	0	0	0	-2.68318	0	1.0037	0	0	0	0	0	0	2.47619	0	0	0
797	0	17.8722	0	0	0	33.29	7.68656	0	34.5872	2	0	1	1	33.29	0	10.5056	0	0	0	0	47.0214	3	2	1.94107	6.40779	-1	0	0	0	0	0	0	1	1	0	0	-3.65044	1	0.812373	2	0	0	2	2	2.17391	9.27706	0	0	3
798	0	14.8484	0	0	11.6518	32.78	4.48756	0	28.807	1	0	1	0	32.78	1	13.5113	0	1	1	0	42.3934	4	1	4.65179	3.72898	-3.25	1	0	0	1	0	0	1	0	0	0	-2.91507	2	0.824909	3	0	0	4	2	5	5.9085	0	0	4
800	0	26.3543	0	0	0	42.52	9.05898	0	54.3693	2	0	1	1	42.52	0	51.8528	0	0	0	0	132.822	9	2	4.68664	6.89157	-5.75	0	0	0	0	0	0	1	1	0	1	-5.29982	2	0.908769	4	0	1	5	2	4	10.0148	0	0	9
801	44.0041	18.9993	0	0	0	29.85	11.4862	1	37.2603	1	1	1	0	55.15	0	17.2143	1	0	0	0	49.7564	5	2	5.15778	7.87475	-1	0	0	0	0	0	0	1	0	0	1	-4.4548	0	0.826058	0	1	0	0	3	0	10.5455	0	0	3
802	0	7.07893	0	0	0	0	14.9718	0	7.07893	0	0	0	0	0	0	1.60315	0	0	0	0	0	0	0	0.309028	0.696923	-3	0	0	0	0	0	0	0	0	0	0	-2.68318	0	1.01128	0	0	0	0	0	0	2.38095	0	0	0
803	0	5.77625	0	0	0	0	7.90923	0	7.07893	0	0	0	0	0	1	2.41102	0	0	0	0	0	0	0	0.807361	0.696923	-2	0	0	0	0	0	0	0	0	0	0	-2.20379	0	0.825179	0	0	0	0	0	0	2.38095	0	0	0
804	12.4667	5.23061	0	0	0	0	9.76009	1	5.23061	0	0	0	0	0	0	0.680556	0	0	0	0	0	0	0	0.340278	1.12994	-3	0	0	0	0	0	0	0	0	0	0	-2.37584	0	0.871768	0	0	0	0	0	0	3.6	0	0	0
805	0	17.7218	0	0	12.137	67.59	3.93966	0	32.9597	0	0	1	0	67.59	1	22.1962	0	1	0	0	90.1771	6	1	5.13698	4.74867	-4	0	0	0	0	0	0	1	1	0	0	-2.60233	2	0.886088	3	0	0	3	3	4.7619	6.38947	0	0	5
806	0	41.6605	0	0	0	46.94	17.1345	0	65.465	1	0	1	1	46.94	0	26.9784	0	0	0	0	91.6153	5	2	4.96682	8.91518	-6.75	0	0	0	0	0	10.5822	1	1	0	0	-5.90034	2	1.30189	2	0	0	0	2	2.8169	9.46976	0	1	4
807	0	23.0094	0	0	0	12.47	27.0461	0	50.4049	0	0	1	1	12.47	1	9.30083	0	0	0	0	14.1242	2	3	2.37099	7.76181	3.75	0	0	0	0	0	0	1	1	0	0	-5.78427	1	0.821765	2	0	0	2	1	1.75439	8.04497	0	0	2
808	0	23.0094	0	0	0	12.47	27.0461	0	50.4049	0	0	1	1	12.47	1	9.30083	0	0	0	0	14.1242	2	3	2.37099	7.76181	3.75	0	0	0	0	0	0	1	1	0	0	-5.78427	1	0.821765	2	0	0	2	1	1.75439	8.04497	0	0	2
809	0	24.3891	0	0	0	33.29	11.8456	0	42.859	2	0	1	1	33.29	0	12.6479	0	0	0	0	47.0214	3	2	2.07581	7.06537	-2.5	0	0	0	0	0	0	1	1	0	0	-4.46862	1	0.975563	2	0	0	4	2	1.81818	9.55333	0	0	3
810	0	6.09649	0	0	0	26.02	5.026	0	11.4488	1	0	0	0	26.02	0	3.88741	0	0	0	0	32.8972	1	1	1.62443	2.08951	0.75	0	0	0	0	0	0	1	0	0	0	-2.15899	0	0.609649	0	0	0	0	1	0	4.66667	0	0	1
811	0	7.15317	0	0	0	12.03	6.47835	0	13.0811	1	0	0	0	12.03	0	2.86657	0	0	0	0	18.0108	1	1	0.713399	2.15854	0	0	0	0	0	0	0	1	0	0	0	-2.35244	0	0.650288	0	0	0	0	1	0	4.8	0	0	1
812	0	9.44178	0	0	0	0	21.8879	0	10.8262	0	0	0	0	0	1	1.92415	0	0	0	0	0	0	0	0.694652	1.20711	-3.5	0	0	0	0	0	0	0	0	0	0	-3.23653	0	0.944178	0	0	0	0	0	0	3.66667	0	0	0
813	0	31.4201	0	0	0	33.29	15.7766	0	56.1187	2	0	1	1	33.29	0	35.5061	0	0	0	0	91.9017	6	2	4.88152	7.21012	-5.25	0	0	0	0	0	0	1	1	0	1	-5.76171	1	1.08345	2	0	0	5	2	1.72414	9.92611	0	0	6
814	0	6.6268	0	0	0	0	12.0919	0	6.6268	0	0	0	0	0	0	0.720556	0	0	0	0	0	0	0	0.360278	1.30671	-3.5	0	0	0	0	0	0	0	0	0	0	-2.73751	0	0.946686	0	0	0	0	0	0	4.28571	0	0	0
815	0	14.8295	0	0	0	30.95	10.805	0	29.3565	0	1	1	0	59.19	0	9.20708	0	0	0	0	36.0215	4	2	2.03136	7.09103	1.25	0	0	0	0	0	0	1	0	0	0	-4.36928	0	0.780502	0	0	0	0	2	0	11.4737	0	0	2
816	0	27.3421	0	0	0	33.29	13.3706	0	46.5178	2	0	1	1	33.29	0	13.3938	0	0	0	0	47.0214	3	2	2.10874	7.21012	-3	0	0	0	0	0	0	1	1	0	0	-4.68333	1	1.05162	2	0	0	5	2	1.72414	9.59385	0	0	3
817	0	24.2493	0	0	0	6.48	16.7652	0	32.0924	0	0	1	0	6.48	0	5.49407	0	0	0	0	6.24863	3	1	0.630624	6.45871	-7	0	0	0	0	0	0	1	0	0	0	-5.10367	0	1.15473	0	0	0	0	2	0	8.48571	0	0	2
818	0	20.104	0	0	0	6.48	16.8407	0	37.0988	0	0	1	0	6.48	0	6.46909	0	0	0	0	6.24863	2	2	0.533565	6.77766	-1	0	0	0	0	0	0	1	0	0	0	-4.6535	0	0.91382	0	0	0	0	2	0	12.1558	0	0	2
820	0	5.69869	0	0	0	0	12.3631	0	5.69869	0	0	0	0	0	0	1.45833	0	0	0	0	0	0	0	0.253472	0.57735	-2.5	0	0	0	0	0	0	0	0	0	0	-2.42151	0	0.949782	0	0	0	0	0	0	2.13333	0	0	0
821	0	24.8788	0	0	11.6823	29.54	19.1178	0	38.776	0	0	1	1	29.54	1	20.9246	0	0	1	0	39.2691	5	1	4.68227	5.57886	-5.5	0	0	0	0	0	0	1	0	0	0	-4.6701	2	1.08169	3	0	0	4	1	4	6.84585	0	0	3
822	0	6.37132	0	0	0	0	12.3631	0	6.37132	0	0	0	0	0	0	1.875	0	0	0	0	0	0	0	0.243056	0	-2.5	0	0	0	0	0	0	0	0	0	0	-2.46368	0	1.06189	0	0	0	0	0	0	1.86667	0	0	0
823	0	5.73059	0	0	0	0	12.3631	0	5.73059	0	0	0	0	0	0	1.47685	0	0	0	0	0	0	0	0.277778	0.288675	-2.5	0	0	0	0	0	0	0	0	0	0	-2.42151	0	0.955098	0	0	0	0	0	0	2.06667	0	0	0
825	0	15.8058	0	0	0	12.47	12.45	0	33.8368	0	0	1	0	12.47	1	8.20311	0	0	0	0	14.1242	2	2	2.48134	6.25246	1.25	0	0	0	0	0	0	1	0	0	0	-4.28861	1	0.752657	2	0	0	1	1	2.38095	12.2905	0	0	2
826	94.6204	21.348	0	0	12.154	44.81	9.47825	2	44.0546	0	0	1	0	44.81	1	17.659	0	1	1	0	60.4042	5	2	5.15402	8.89246	-1.75	1	0	0	1	0	0	1	1	0	0	-4.43337	2	0.85392	3	1	0	6	3	4.16667	11.3367	0	0	5
827	0	22.5686	0	0	12.7629	61.17	14.4261	0	48.4647	1	0	1	1	69.55	2	50.239	0	0	1	0	108.417	7	2	5.76291	7.86776	1.5	0	0	0	0	0	0	1	1	0	1	-4.56199	2	0.835874	0	0	0	4	2	4.25532	8.8433	0	0	6
828	0	20.0318	0	0	0	6.48	15.231	0	27.5607	0	0	1	0	6.48	0	5.11959	0	0	0	0	6.24863	3	1	0.623866	5.06537	-5	0	0	0	0	0	0	1	0	0	0	-4.74002	0	1.05431	0	0	0	0	2	0	7.27485	0	0	2
829	0	10.4135	0	0	0	0	17.0409	0	10.4135	0	0	0	0	0	0	2.30407	0	0	0	0	0	0	0	0.389213	1.81676	-4.5	0	0	0	0	0	0	0	0	0	0	-3.28672	0	1.15705	0	0	0	0	0	0	4.5	0	0	0
832	0	15.4078	0	0	0	12.03	20.5503	0	31.1348	0	0	1	0	12.03	1	5.61113	0	0	0	0	18.0108	1	2	0.726258	6.12069	2	0	0	0	0	0	0	1	0	0	0	-4.48047	0	0.770391	0	0	0	0	1	0	12.2526	0	0	1
833	47.5623	19.1499	0	0	12.2279	38.33	15.2308	1	45.7712	0	0	0	0	38.33	1	61.1878	0	1	0	0	113.996	8	2	7.6549	6.78132	-1	0	0	0	0	0	0	1	0	0	1	-5.13896	2	0.79791	3	0	1	5	1	5.88235	9.25725	0	0	7
836	0	8.47401	0	0	0	0	14.5227	0	8.47401	0	0	0	0	0	0	1.51519	0	0	0	0	0	0	0	0.378796	1.50166	-4	0	0	0	0	0	0	0	0	0	0	-3.014	0	1.05925	0	0	0	0	0	0	4.42857	0	0	0
837	56.5918	16.2644	0	0	12.3054	20.31	9.38518	1	26.8672	0	0	1	0	20.31	1	12.0469	0	0	0	0	28.2692	2	1	5.30537	4.57338	-3	0	0	0	0	0	0	1	0	0	0	-3.44958	1	0.903581	1	0	0	3	1	2.43902	6.35294	0	0	2
838	0	11.8782	0	0	0	12.03	6.26227	0	13.0811	1	0	0	0	12.03	0	2.32304	0	0	0	0	18.0108	1	0	0.812214	2.15854	-6	0	0	0	0	0	0	1	0	0	0	-2.49179	0	1.07984	0	0	0	0	1	0	4.8	0	0	1
841	17.8282	12.5691	0	0	0	12.03	12.3053	1	25.3119	1	0	0	0	12.03	0	6.5237	0	0	0	0	18.0108	1	2	1.28833	6.84156	1.5	0	0	0	0	0	0	1	0	0	0	-3.89907	0	0.739358	0	0	0	0	1	0	12.8088	0	0	1
843	0	17.997	0	0	0	36.26	8.35577	0	29.3953	0	0	1	0	36.26	1	11.949	0	0	0	0	45.1836	4	1	2.74793	5.00763	-1.5	0	0	0	0	0	0	1	0	0	0	-4.15103	1	0.899848	2	0	0	1	2	2.5641	7.50526	0	0	3
844	0	27.4498	0	0	12.7264	32.34	18.1781	0	47.1907	0	0	1	1	32.34	1	16.5524	0	0	0	0	46.28	3	2	5.72638	7.98768	-3	0	0	0	0	0	0	1	1	0	0	-5.3149	1	0.980349	1	0	0	4	2	1.66667	11.5212	0	0	3
845	0	16.6843	0	0	0	50.72	2.73204	0	28.3311	2	0	1	1	50.72	0	16.2037	0	0	0	0	82.6939	4	1	3.72608	3.58404	-4.75	0	0	0	0	0	9.72608	1	1	0	0	-2.04272	3	0.878122	5	0	0	6	1	6.81818	6.42105	0	0	4
846	0	15.022	0	0	0	24.39	22.7348	0	30.7906	0	0	1	0	24.39	1	7.21641	0	0	0	0	34.7963	2	2	1.62396	5.20865	3	0	0	0	0	0	0	1	0	0	0	-4.8284	0	0.751098	0	1	0	0	2	0	7.5	0	0	2
847	70.2924	27.8723	0	0	0	46.18	11.7853	1	55.8482	2	1	1	1	74.42	0	16.0802	1	0	0	0	63.8069	5	3	2.24304	10.96	1	0	0	0	0	0	0	1	1	0	0	-5.54479	1	0.899106	2	0	0	3	3	1.72414	12.228	0	0	4
848	0	24.0437	0	0	12.1215	40.54	16.0468	0	44.6955	0	0	1	1	40.54	1	33.9899	0	0	0	0	85.9127	5	2	5.12149	6.82505	-2.25	0	0	1	0	0	10.8815	1	1	0	1	-4.73785	2	0.924758	2	0	0	3	1	4.08163	8.80923	0	0	4
849	0	16.465	0	0	0	8.17	10.6428	0	32.3548	1	1	1	0	36.41	0	5.32403	0	0	0	0	6.24863	3	2	0.450231	6.86679	0.5	0	0	0	0	0	0	1	0	0	0	-4.44405	0	0.823251	0	0	0	0	2	0	11.3263	0	0	2
850	0	19.3064	0	0	0	12.03	23.4308	0	33.9284	0	0	1	0	12.03	0	6.46315	0	0	0	0	18.0108	1	2	0.80934	7.79838	-0.5	0	0	0	0	0	0	1	0	0	0	-4.58603	0	0.919351	0	0	0	0	1	0	12.2857	0	0	1
851	0	16.2953	0	0	0	16.96	12.4632	0	31.5723	0	1	1	0	45.2	0	8.17009	0	0	0	0	21.1351	4	2	2.33448	7.76983	0.5	0	0	0	0	0	0	1	0	0	0	-4.5577	0	0.814763	0	0	0	0	2	0	11.6579	0	0	2
852	0	17.2213	0	0	0	6.48	11.7093	0	24.5807	0	0	1	0	6.48	0	5.51033	0	0	0	0	6.24863	3	1	0.577245	4.81927	-4	0	0	0	0	0	0	1	0	0	0	-4.31826	0	1.01302	0	0	0	0	2	0	6.72059	0	0	2
854	0	25.599	0	0	12.1284	40.54	16.9151	0	44.6955	0	0	1	1	40.54	1	31.83	0	0	0	0	85.9127	5	2	5.12843	6.99172	-2	0	0	1	0	0	10.9093	1	1	0	1	-5.07396	2	0.984578	2	0	0	3	1	4.08163	8.80923	0	0	4
857	0	15.0813	0	0	12.0534	29.1	10.3555	0	25.2155	1	0	0	0	29.1	1	15.2999	0	0	0	0	43.1557	3	1	5.05344	3.82844	-1.5	0	0	0	0	0	0	1	0	0	0	-3.49186	1	0.942579	1	0	0	0	1	2.94118	5.23333	0	0	2
859	0	21.1725	0	0	0	8.17	16.9298	0	42.961	0	1	1	0	36.41	0	30.8568	0	0	0	0	51.129	6	2	5.10672	7.19359	-2.25	0	0	0	0	0	0	1	0	0	1	-5.29165	0	0.882188	0	0	0	0	2	0	11.8478	0	0	5
860	0	27.5612	0	0	0	11.41	12.6	0	52.2678	0	1	1	0	39.65	0	36.0164	0	0	0	0	54.2533	7	2	5.72599	9.00404	-5.5	0	0	0	0	0	0	1	0	0	1	-5.3813	0	0.984329	0	0	0	0	3	0	13.2249	0	0	6
863	0	13.2409	0	0	0	28.16	7.62971	0	26.3171	0	0	1	0	28.16	0	32.6633	0	0	0	0	82.8009	7	0	4.47459	3.85762	-5.25	0	0	0	0	0	0	1	0	0	0	-3.42981	0	0.778874	0	1	0	0	3	0	6.51471	0	0	6
865	229.942	35.5681	0	0	11.5533	69.06	8.99606	2	70.344	1	0	1	1	69.06	1	37.3735	0	1	1	0	81.1787	10	2	4.55334	12.0473	-6.5	0	0	0	0	0	0	1	1	0	0	-5.22763	4	0.988001	7	1	0	9	4	6.25	10.7429	0	0	7
866	0	9.76768	0	0	0	20.08	8.6764	0	18.1248	0	0	0	0	20.08	1	8.99019	0	0	0	0	26.8361	2	1	4.4951	2.2764	0.25	0	0	0	0	0	0	1	0	0	0	-2.43061	1	0.75136	0	0	0	1	1	3.57143	4.84615	0	0	1
868	63.6611	14.155	0	2	0	137.5	3.43722	1	35.6237	0	1	1	0	165.74	2	17.9589	0	0	0	0	183.232	9	1	2.62969	6.55884	2.25	0	0	0	2	0	0	1	0	0	0	-2.71892	0	0.643409	0	8	0	0	8	0	7.5671	0	0	8
869	26.9228	20.7385	1	0	11.2858	62.32	4.49964	1	35.889	0	0	0	0	62.32	1	22.8966	2	0	1	0	78.8282	4	1	4.28583	7.20998	-3.5	0	0	0	0	0	9.26937	0	1	0	0	-3.56143	3	0.987548	4	0	0	9	1	7.14286	10.881	0	0	3
871	68.6508	11.9244	0	0	11.4752	93.03	0.541312	2	24.591	1	0	1	0	93.03	2	23.4896	0	1	0	0	130.41	7	0	4.47522	5.6134	-5.25	0	0	0	0	0	9.0182	1	0	0	0	-1.35777	3	0.701436	4	3	0	3	4	10.3448	8.48529	0	0	6
873	38.6924	11.0626	0	0	11.4514	90.37	0.110128	1	21.0454	1	0	1	0	90.37	3	22.5661	0	1	0	0	131.635	6	0	4.45139	4.26242	-6	0	0	0	1	0	8.89611	1	0	0	0	-0.91329	3	0.737506	4	2	0	3	3	10.7143	6.27619	0	0	6
875	144.593	17.5433	0	0	10.7599	90.02	1.87041	2	34.4059	0	1	1	1	115.32	2	21.342	2	0	1	0	81.3893	8	0	3.75992	6.14751	-3	0	0	0	0	5.7191	0	1	1	0	0	-2.90532	3	0.797421	2	1	0	2	4	7.14286	7.99567	0	0	5
876	0	4.08028	0	0	10.2618	57.53	2.70013	0	12.122	0	0	0	0	57.53	1	17.135	0	0	1	0	110.512	3	1	3.26176	2.33535	2.25	0	0	0	0	0	8.40565	0	0	0	0	-1.91732	3	0.408028	3	0	0	0	0	18.75	4.66667	0	1	3
878	0	65.2643	0	0	12.0759	166.75	2.66182	0	117.339	4	0	1	1	166.75	4	69.6926	0	1	0	0	250.102	11	2	6.82942	14.1106	-8.75	0	0	0	0	0	11.8467	1	1	0	0	-4.89652	5	1.33192	5	0	3	16	6	5.05051	13.4014	0	0	11
879	228.03	102.602	0	0	13.002	171.17	5.40102	3	179.579	3	0	1	1	171.17	5	106.53	2	1	1	0	239.319	14	2	8.32199	23.5432	-18.25	0	0	2	0	0	11.9702	1	1	0	0	-6.26732	10	1.71003	14	0	4	50	4	8.62069	22.4633	0	0	13
880	0	41.3498	1	0	11.4836	81	16.704	0	75.7268	1	0	1	1	81	1	38.3422	0	0	1	0	156.319	5	3	6.05583	10.3902	-2.25	0	0	1	0	0	9.42209	1	1	0	0	-5.77213	4	1.11756	4	0	0	6	1	5.26316	10.2793	0	0	5
881	0	65.2643	0	0	12.0759	166.75	2.66182	0	117.339	4	0	1	1	166.75	4	69.6926	0	1	0	0	250.102	11	2	6.82942	14.1106	-8.75	0	0	0	0	0	11.8467	1	1	0	0	-4.89652	5	1.33192	5	0	3	16	6	5.05051	13.4014	0	0	11
882	0	15.7469	0	0	10.7465	84.58	0.85511	0	29.0127	2	0	1	1	84.58	1	22.3233	0	1	0	0	129.736	5	1	3.74651	3.70494	-3.25	0	0	0	0	0	9.68424	1	1	0	0	-1.44776	3	0.828785	4	0	0	6	2	7.31707	6.32749	0	0	5
884	138.451	26.929	0	0	12.2054	78.82	6.4144	2	53.6198	1	0	1	0	78.82	2	27.7772	0	1	0	0	95.6843	8	2	5.48856	10.575	-4	0	0	0	2	0	0	1	1	0	0	-4.48188	2	0.897633	2	2	0	0	5	3.7037	12.5862	0	0	7
886	52.4019	15.2899	0	0	11.278	133.08	0.324337	1	30.6812	2	0	1	0	133.08	5	34.1012	0	1	0	0	173.321	9	0	4.70027	5.37731	-6.25	0	1	0	1	0	9.14227	1	0	0	0	-1.23925	4	0.80473	5	2	0	4	5	12.5	6.74854	0	0	8
887	52.4019	15.2899	0	0	11.278	133.08	0.324337	1	30.6812	2	0	1	0	133.08	5	34.1012	0	1	0	0	173.321	9	0	4.70027	5.37731	-6.25	0	1	0	1	0	9.14227	1	0	0	0	-1.23925	4	0.80473	5	2	0	4	5	12.5	6.74854	0	0	8
888	0	36.1939	0	0	0	63.95	10.431	0	66.6853	0	0	1	1	63.95	0	25.457	0	0	0	0	78.1832	6	2	4.24211	8.89203	-3	0	0	0	0	0	0	1	1	0	0	-4.82851	4	1.09679	8	0	0	7	2	5.6338	8.77652	0	0	6
890	0	6.56848	0	0	10.5728	63.6	2.89409	0	17.8822	0	0	0	0	63.6	2	22.1178	0	0	1	0	103.973	4	1	3.61195	3.01215	1.75	0	0	0	0	0	8.68724	0	0	0	0	-1.98834	4	0.505267	5	0	0	3	0	19.0476	5.30769	0	0	4
892	51.376	21.267	0	0	11.6093	65.2	1.56514	1	38.7242	0	0	1	1	73.58	2	22.0012	1	1	1	0	63.8423	6	1	4.60932	6.5814	-3.5	0	0	0	0	0	0	1	1	0	0	-2.89522	2	0.924652	0	0	0	4	3	4.16667	9.24901	0	0	4
893	42.1136	18.7253	0	0	11.5149	52.57	4.38448	1	31.6835	0	0	1	1	52.57	1	18.8166	0	1	0	0	88.9633	4	1	4.51493	5.53419	-3.75	0	0	0	0	0	9.7943	1	1	0	0	-2.82594	2	0.936266	2	0	1	2	2	4.54545	8.02105	0	1	4
894	45.631	15.8968	0	0	11.6174	65.2	0.799772	1	32.646	0	0	1	1	73.58	2	20.3752	1	1	1	0	63.8423	6	1	4.61742	5.50968	-1.5	0	0	0	0	0	0	1	0	0	0	-2.17915	2	0.794838	0	0	0	4	3	4.87805	8.01579	0	0	4
895	0	20.2373	0	0	11.3821	70.59	1.70629	0	34.5182	1	0	1	0	70.59	1	23.6113	0	1	0	0	114.85	5	1	4.38214	5.01173	-4.5	0	0	0	0	0	9.96272	1	1	0	0	-2.31106	3	0.96368	4	0	0	7	2	6.66667	8.87619	0	0	5
897	0	10.961	0	0	0	41.03	2.04632	0	20.4258	0	0	1	0	41.03	1	16.421	0	0	0	0	53.6723	4	0	4.4951	2.41837	-2	0	0	0	0	0	0	0	0	0	0	-1.40329	2	0.782929	0	0	0	0	2	7.14286	4.98901	0	0	2
899	0	5.18776	0	0	0	24.92	0.424945	0	10.9279	0	0	0	0	24.92	0	3.6067	0	0	0	0	34.7963	2	0	1.17625	1.96861	0	0	0	0	0	0	0	1	0	0	0	-1.30685	0	0.518776	0	0	0	0	2	0	4.82222	0	0	2
900	22.5214	7.05131	0	0	11.3733	72.68	0.162213	1	18.3828	0	0	0	0	72.68	2	19.7635	1	1	0	0	73.324	6	0	4.44079	4.06048	-2.5	0	1	0	1	0	0	1	0	0	0	-1.20685	2	0.542408	2	3	0	0	4	9.52381	7.20513	0	0	5
901	0	1.60306	0	0	0	0	1.86016	0	1.91421	0	0	0	0	0	0	2.61111	0	0	0	0	0	2	0	0.652778	0	-1.5	0	0	0	0	0	0	0	0	0	0	-1.45613	0	0.534354	0	0	0	0	0	0	1.33333	0	0	0
902	18.0993	21.4013	0	0	0	52.93	3.72931	1	36.0853	3	0	0	0	52.93	1	24.1617	0	0	0	0	99.4909	4	1	4.44069	8.99587	-6.25	0	0	0	0	0	10.2078	1	0	0	0	-2.9215	3	1.01911	4	0	0	8	1	7.5	15.419	0	1	4
903	25.9667	7.89671	0	0	10.696	46.17	0.153121	1	12.8314	0	0	0	0	46.17	2	15.4032	0	1	0	0	68.3006	3	0	4.00556	2.46143	-3	0	1	0	0	0	0	0	0	0	0	-1.12126	2	0.789671	2	0	0	0	1	9.52381	4.02222	0	0	3
904	38.581	18.4509	0	0	0	50.41	18.2672	1	43.5295	0	0	1	0	50.41	1	31.0517	1	1	0	0	91.2145	6	2	6.34789	8.18675	1.5	0	0	0	0	0	10.515	1	0	0	0	-5.07555	1	0.768789	1	1	0	4	3	2.7027	12.5326	0	0	4
906	29.0762	11.288	0	0	11.375	58.2	0.0548536	1	17.9816	1	0	0	0	58.2	2	19.149	0	1	0	0	86.3114	4	0	4.64847	3.85964	-5.5	0	0	0	0	0	0	0	0	0	0	-1.22849	2	0.868308	2	0	1	0	2	7.40741	5.80769	0	0	4
907	0	9.21244	1	0	10.4794	37.3	4.24389	0	12.2268	0	0	0	0	37.3	1	12.3074	0	0	1	0	67.8283	2	0	3.47935	1.55259	-3.5	0	0	0	0	0	8.63546	0	0	0	0	-2.05538	2	0.921244	2	0	0	0	0	7.69231	2.91111	0	0	2
908	18.0993	21.4013	0	0	0	52.93	3.72931	1	36.0853	3	0	0	0	52.93	1	24.1617	0	0	0	0	99.4909	4	1	4.44069	8.99587	-6.25	0	0	0	0	0	10.2078	1	0	0	0	-2.9215	3	1.01911	4	0	0	8	1	7.5	15.419	0	1	4
909	0	22.4878	0	0	0	45.59	4.80546	0	41.1669	2	0	1	1	45.59	1	19.8584	0	0	0	0	73.5931	4	1	5.15186	8.16095	-4	0	0	0	0	0	11.1519	1	1	0	0	-3.63561	2	0.93699	3	0	0	4	2	4.16667	10.6159	0	0	4
910	0	8.80072	0	0	10.6237	75.27	0.239044	0	17.2462	0	0	0	0	75.27	3	23.948	0	1	0	0	111.456	5	0	4.17514	3.02441	-3.25	0	2	0	1	0	0	0	0	0	0	-0.875269	3	0.733393	3	1	0	1	2	13.6364	4.77273	0	0	5
911	142.924	25.8544	0	0	0	83.02	38.342	2	56.1544	0	0	1	0	83.02	0	40.3649	0	1	0	0	124.358	10	1	6.28342	8.48316	-1	0	0	0	0	0	0	1	0	0	1	-5.32702	1	0.891532	2	4	0	2	7	2.08333	10.6527	0	0	8
912	60.6526	22.1863	0	0	12.2703	45.78	12.4236	1	42.9484	0	0	1	1	45.78	4	19.1533	0	1	0	0	54.1827	7	1	5.27033	8.33467	-5.5	0	0	0	1	0	0	1	0	0	0	-3.94063	1	0.853319	1	2	0	0	5	2.08333	10.7354	0	0	6
913	0	1.38743	0	0	0	20.23	0.0297385	0	1.91421	0	0	0	0	20.23	0	3.13889	0	0	0	0	42.6833	1	0	1.56944	0	-1.25	0	0	0	0	0	7.56944	0	0	0	0	-0.288135	1	0.462475	1	0	0	0	0	11.1111	1.33333	0	0	1
914	0	11.8046	1	0	10.5761	63.32	1.32135	0	15.8929	0	0	0	0	63.32	1	15.8115	0	0	1	0	100.725	3	0	3.57606	2.86982	-5.25	0	0	0	0	0	8.70649	1	0	0	0	-1.58844	2	0.983713	2	0	0	2	1	6.89655	4.56061	0	0	3
915	0	3.71084	0	0	0	20.23	0.639938	0	4.4325	0	0	0	0	20.23	0	4.28704	0	0	0	0	42.6833	1	0	2.14352	0	-2.25	0	0	0	0	0	8.14352	0	0	0	0	-0.923611	1	0.742167	1	0	0	0	0	6.66667	1.8	0	0	1
916	0	2.35011	0	0	0	20.23	0.120325	0	2.95465	0	0	0	0	20.23	0	3.75	0	0	0	0	42.6833	1	0	1.875	0	-1.75	0	0	0	0	0	7.875	0	0	0	0	-0.603845	1	0.587527	1	0	0	0	0	8.33333	1.66667	0	0	1
917	40.5452	41.8078	0	0	11.8335	94.83	3.43944	1	61.2351	1	0	0	1	94.83	4	66.4058	0	0	0	0	193.3	6	0	8.85906	10.2416	-11	0	0	1	0	0	9.45751	0	1	0	0	-3.45643	5	1.49314	5	0	1	11	0	8.77193	14.4788	0	0	6
920	0	20.6874	0	0	0	70.93	11.9538	0	53.1307	0	0	1	0	70.93	0	15.7736	0	0	0	0	89.9312	7	1	1.62728	9.6363	4.5	0	0	0	0	0	0	1	0	0	0	-4.73774	0	0.689579	0	4	0	0	7	0	10.3241	0	0	7
921	0	1.22164	0	0	9	69.11	3.47289	0	3.23205	0	0	0	0	69.11	1	5	0	1	0	0	90.9393	3	0	2	0	-0.75	0	0	0	1	0	0	0	0	0	0	0.483586	1	0.305409	1	1	0	0	2	12.5	1.5	0	0	3
922	0	1.91981	0	0	0	0	2.79546	0	2.95465	0	0	0	0	0	1	3.04938	0	0	0	0	0	2	0	0.762346	0	-1	0	0	0	0	0	0	0	0	0	0	-1.71457	0	0.479953	0	0	0	0	0	0	1.66667	0	0	0
923	0	11.6498	0	0	11.055	75.27	0.606711	0	27.2582	0	0	0	0	75.27	3	28.0132	0	1	0	0	111.456	5	1	4.97579	5.65825	-0.25	0	2	0	1	0	0	1	0	0	0	-2.03189	3	0.685285	3	1	0	5	2	10.3448	6.35294	0	0	5
924	223.214	102.997	0	0	13.002	154.1	7.26173	3	175.024	3	0	1	1	154.1	4	94.6992	2	0	1	0	214.174	13	2	8.32199	23.3087	-19	0	0	2	0	0	11.9761	1	1	0	0	-6.5846	9	1.74571	13	0	3	47	4	7.69231	22.4278	0	0	12
926	0	17.1449	0	0	12.025	58.2	1.29579	0	26.1886	0	0	0	0	90.29	3	22.6569	0	1	0	0	86.3114	5	0	5.02496	5.29995	-5.5	0	2	0	1	0	0	1	0	0	0	-2.33347	2	1.07156	2	1	0	2	2	5.88235	5.13333	0	0	4
927	35.4532	8.4158	0	0	11.6034	26.93	5.3171	1	19.4824	0	0	0	0	26.93	2	9.20686	0	1	0	0	31.1485	3	1	4.60343	4.26877	0.75	0	0	0	0	0	0	1	0	0	0	-2.57022	1	0.601128	1	0	0	1	2	3.84615	6.0989	0	0	3
928	0	2.59206	0	0	0	20.23	0.120325	0	3.23205	1	0	0	0	20.23	0	4.11111	0	0	0	0	42.6833	1	0	2.05556	0	-1.75	0	0	0	0	0	8.05556	0	0	0	0	-0.669654	1	0.648015	1	0	0	0	0	8.33333	1.5	0	0	1
929	0	2.8675	0	0	9.8125	17.07	0.428975	0	4.4325	0	0	0	0	17.07	1	5.625	0	0	0	0	25.1449	1	0	2.8125	0	-0.75	0	0	0	0	0	0	0	0	0	0	-0.864021	1	0.573499	1	0	0	0	0	7.69231	1.8	0	0	1
930	38.287	14.2974	0	0	0	57.28	1.70664	1	26.4626	2	0	1	0	57.28	0	14.7164	1	0	0	0	71.694	4	1	3.78676	4.52004	-2.75	0	0	0	0	0	9.78676	1	0	0	0	-2.21465	2	0.7943	3	0	0	5	2	5.26316	7.88889	0	0	3
931	0	10.194	0	0	11.753	48.02	6.70083	0	27.987	0	0	0	0	48.02	2	12.557	0	1	0	0	61.1664	3	2	4.75297	5.93739	4.25	0	0	0	1	0	0	1	0	0	0	-3.73191	1	0.566336	1	1	0	2	2	3.33333	11.9608	0	0	3
933	79.4804	26.3822	0	0	11.099	115.54	0.0675965	2	40.9652	3	0	1	0	123.92	2	43.5707	0	1	1	0	139.149	10	0	4.099	7.19115	-12.5	0	0	0	0	0	0	1	1	0	0	-1.22057	8	1.19919	11	0	6	11	1	18.6047	10	0	0	9
935	34.3952	9.65663	0	0	10.8914	63.4	0.00688896	1	16.0986	1	0	0	0	63.4	2	18.4902	0	1	0	0	86.3114	4	0	4.19722	3.07873	-4.5	0	0	0	0	0	0	1	0	0	0	-0.681357	2	0.804719	2	0	1	0	2	7.69231	4.30303	0	0	4
936	185.866	33.4231	0	0	13.3745	65.64	9.16462	2	61.8394	2	0	1	1	74.02	2	36.6879	1	1	1	0	59.9557	8	2	6.37454	11.9932	-4	0	0	0	0	0	0	1	1	0	0	-5.27564	3	1.01282	2	0	0	5	3	4.7619	12.0019	0	0	5
938	66.8979	31.2834	0	0	12.9221	64.16	13.0564	1	54.1523	0	0	1	1	64.16	3	33.0392	1	1	0	0	92.4699	7	1	5.92211	9.95417	-7.75	0	0	0	0	5.33944	0	1	1	0	1	-4.8164	2	1.04278	2	1	0	2	4	3.50877	12.8207	0	0	7
939	0	3.20424	0	0	0	9.23	0.639938	0	4.09272	0	0	0	0	9.23	0	2.66667	0	0	0	0	10.9999	1	0	1.33333	0.353553	-2.5	0	0	0	0	0	0	0	0	0	0	-0.898193	1	0.640847	2	0	0	0	0	6.66667	2	0	0	1
940	0	22.3065	0	0	0	12.47	13.211	0	32.5962	1	0	0	0	12.47	0	7.58465	0	0	0	0	14.1242	2	1	2.00506	7.41843	-6.25	0	0	0	0	0	0	1	0	0	0	-4.17232	1	1.11532	2	0	0	4	1	2.22222	13.0105	0	0	2
941	0	9.77586	0	0	0	24.06	6.44943	0	18.0524	0	0	0	0	56.15	1	5.79209	0	0	0	0	36.0215	3	1	1.46048	3.12126	-0.5	0	0	0	1	0	0	1	0	0	0	-3.03329	0	0.698276	0	1	0	0	2	0	5.45055	0	0	2
942	0	0	0	0	0	0	0	0	0	0	0	0	0	0	0	0	0	0	0	0	0	1	0	0	0	0	0	0	0	0	0	0	0	0	0	0	0	0	0	0	0	0	0	0	0	0	0	0	0
944	0	19.108	0	0	0	3.24	24.8376	0	35.5751	0	0	1	0	3.24	1	6.70756	0	0	0	0	3.12431	1	2	0.714157	5.32389	0.75	0	0	0	0	0	0	1	0	0	0	-5.09424	0	0.868544	0	0	0	0	1	0	9.12987	0	0	1
945	0	15.6865	0	0	11.3392	66.48	0.89745	0	27.9517	0	0	0	0	66.48	4	28.9423	0	1	0	0	96.5698	5	0	5.17058	5.03305	-5.5	0	2	0	1	0	0	1	0	0	0	-2.21428	3	0.922738	3	1	0	4	2	9.09091	6.45588	0	0	5
946	0	1.5	0	0	0	0	3.549	0	1.5	0	0	0	0	0	0	0	0	0	0	0	0	0	0	0	0	-1.5	0	0	0	0	0	0	0	0	0	0	-1.32968	0	0.5	0	0	0	0	0	0	2	0	0	0
948	0	16.1256	0	0	11.0042	75.27	0.572539	0	26.1886	0	0	0	0	75.27	3	27.5821	0	1	0	0	111.456	5	0	4.89162	4.9464	-5.25	0	2	0	1	0	0	1	0	0	0	-1.90262	3	1.00785	3	1	0	5	2	8.82353	5.13333	0	0	5
949	35.3102	9.33259	0	1	0	36.42	7.07449	1	18.7406	0	0	0	0	36.42	1	12.1162	0	0	0	0	52.807	5	1	1.86712	4.56323	-1.5	0	0	0	1	0	0	1	0	0	0	-3.26168	0	0.666613	0	3	0	0	3	0	6.31868	0	0	3
952	0	25.7069	0	0	0	8.17	16.4734	0	42.8892	1	2	1	0	61.71	0	6.83062	0	0	0	0	6.24863	4	2	0.562827	9.24304	-2	0	0	0	0	0	0	1	0	0	0	-5.65095	0	1.02827	0	0	0	0	2	0	12.8667	0	0	2
954	0	3.90004	0	0	0	0	8.6534	0	8.0229	0	0	0	0	0	0	1.23444	0	0	0	0	0	0	1	0.162037	1.59539	2	0	0	0	0	0	0	0	0	0	0	-2.72345	0	0.487505	0	0	0	0	0	0	4.42857	0	0	0
955	0	4.13539	0	0	0	0	8.6534	0	8.42551	0	0	0	0	0	0	1.31481	0	0	0	0	0	0	1	0.166667	1.73736	2	0	0	0	0	0	0	0	0	0	0	-2.84299	0	0.516924	0	0	0	0	0	0	4.39286	0	0	0
956	0	7.14209	0	0	0	9.23	3.12033	0	13.7113	0	0	0	0	9.23	0	33.0529	0	0	0	0	85.8005	7	0	3.58796	0.53033	-6.5	0	0	0	0	0	0	0	0	0	0	-2.63088	1	0.714209	2	0	0	0	0	8.33333	2.66667	0	0	6
957	28.8532	7.97387	0	0	0	16.13	1.61918	1	14.6149	1	0	0	0	16.13	0	3.80713	0	0	0	0	19.9098	2	0	1.13704	3.43676	-1.75	0	0	0	0	0	0	1	0	0	0	-2.13048	0	0.664489	0	0	0	0	2	0	5.95455	0	0	2
958	0	3.83704	0	0	0	0	4.10565	0	2.95465	0	0	0	0	0	0	1.26389	0	0	0	0	0	1	0	0.498264	0	-1.5	0	0	0	0	0	0	0	0	0	0	-2.10624	0	0.959261	0	0	0	0	0	0	1.66667	0	0	0
959	0	13.3955	0	0	0	41.49	3.76753	0	22.7733	2	0	1	0	41.49	0	12.8588	0	0	0	0	71.694	3	1	3.64118	3.10432	-2.75	0	0	0	0	0	9.64118	1	0	0	0	-2.27909	2	0.837221	3	0	0	4	1	5.40541	5.84167	0	0	3
960	0	3.21967	0	0	0	0	4.33223	0	4.4325	0	0	0	0	0	1	4.98148	0	0	0	0	0	3	0	0.845679	0	-1.75	0	0	0	0	0	0	0	0	0	0	-2.30567	0	0.643934	0	0	0	0	0	0	1.8	0	0	0
961	0	6.44156	0	0	0	0	6.78141	0	8.3094	0	0	0	0	0	0	18.8654	0	0	0	0	44.8803	5	0	2.99942	0	-4	0	0	0	0	0	0	0	0	0	0	-3.00146	0	0.920222	0	0	0	0	0	0	2	0	0	3
962	0	2.8087	0	0	0	0	3.30135	0	3.23205	0	0	0	0	0	0	4.16667	0	0	0	0	0	3	0	0.694444	0	-2.25	0	0	0	0	0	0	0	0	0	0	-2.02418	0	0.702176	0	0	0	0	0	0	1.5	0	0	0
963	0	14.5779	0	0	12.0945	40.62	8.72249	0	36.1959	0	0	1	0	40.62	2	25.0731	0	1	0	0	56.5385	5	2	5.48008	6.89855	2.25	0	0	0	0	0	0	1	0	0	0	-4.07632	2	0.694186	2	0	0	5	2	5.88235	10.0952	0	0	4
964	0	4.5672	0	0	0	0	4.95686	0	5	0	0	0	0	0	0	5.69907	0	0	0	0	0	3	0	0.949846	0	-2.75	0	0	0	0	0	0	0	0	0	0	-2.38865	0	0.91344	0	0	0	0	0	0	1.6	0	0	0
965	0	12.7705	0	0	11.7264	49.41	7.34495	0	32.9093	0	0	1	0	49.41	2	24.3446	0	1	0	0	71.4249	5	2	5.32119	6.63117	3	0	0	0	0	0	0	1	0	0	0	-3.89368	2	0.638523	2	0	0	5	2	6.45161	10.0789	0	0	4
966	0	23.7568	0	0	0	35.94	6.93751	0	44.0451	1	0	1	1	35.94	0	17.1362	0	0	0	0	59.9319	5	2	2.77909	7.23279	-4.5	0	0	0	0	0	8.77909	1	1	0	0	-3.80064	2	0.913724	3	0	0	0	2	3.77358	8.18154	0	0	4
969	0	4.09029	0	0	0	0	8.6534	0	8.39433	0	0	0	0	0	0	1.34963	0	0	0	0	0	0	1	0.12037	1.42675	2	0	0	0	0	0	0	0	0	0	0	-2.84299	0	0.511286	0	0	0	0	0	0	4.35714	0	0	0
971	0	18.8415	0	0	0	3.24	16.0794	0	26.738	0	0	0	0	3.24	0	4.23481	0	0	0	0	3.12431	1	1	0.810509	5.71486	-4.75	0	0	0	0	0	0	1	0	0	0	-4.42248	0	1.04675	0	0	0	0	1	0	7.11765	0	0	1
972	0	7.13025	0	0	0	9.23	3.12033	0	13.621	0	0	0	0	9.23	0	31.778	0	0	0	0	85.8005	7	0	3.21921	0	-6.5	0	0	0	0	0	0	0	0	0	0	-2.60014	1	0.713025	2	0	0	0	0	8.33333	2.73333	0	0	6
973	0	15.0555	0	0	11.7894	61.69	11.2855	0	35.9152	0	0	1	0	61.69	2	27.6936	0	1	0	0	102.625	6	2	4.78937	6.85258	2	0	0	0	0	0	9.84616	1	0	0	0	-4.40723	2	0.71693	2	0	0	7	2	6.45161	10.2286	0	0	4
974	0	9.63535	0	0	0	90.71	7.77225	0	24.1044	0	0	1	0	90.71	0	17.957	0	0	0	0	115.906	7	1	1.91409	5.06808	2.5	0	0	0	0	0	0	1	0	0	0	-3.4521	0	0.602209	0	4	0	0	5	0	6.79167	0	0	5
976	89.7673	29.5426	0	0	12.5099	69.64	4.87919	1	48.0037	0	0	1	0	69.64	2	28.6756	0	1	0	0	93.2339	7	0	5.5099	8.78217	-9.75	0	1	0	0	0	0	1	1	0	0	-3.31203	2	1.05509	2	3	0	2	5	3.38983	9.95767	0	0	7
977	0	11.6899	0	0	11.6564	41.46	9.68447	0	29.6886	0	0	1	0	41.46	2	16.6735	0	1	0	0	59.9412	4	2	4.65641	5.99735	3.5	0	0	0	0	0	0	1	0	0	0	-4.00205	1	0.615256	1	0	0	3	2	3.33333	9.97661	0	0	3
979	19.302	23.0742	0	0	0	41.93	4.70331	1	38.4133	3	0	0	0	41.93	1	21.0453	0	0	0	0	67.8074	4	1	4.55421	9.35335	-7	0	0	0	0	0	10.5542	1	0	0	0	-3.08377	3	1.04883	5	0	0	8	1	6.97674	15.5065	0	0	4
982	0	14.9493	0	0	0	41.49	6.42033	0	28.696	2	0	1	0	41.49	0	14.0226	0	0	0	0	71.694	3	2	3.84395	4.69086	-0.75	0	0	0	0	0	9.84395	1	0	0	0	-2.98407	2	0.786807	3	0	0	5	1	5	8.64327	0	0	3
983	0	22.4284	0	0	0	3.24	21.8232	0	37.7874	0	0	1	0	3.24	0	7.51747	0	0	0	0	3.12431	1	2	0.622153	6.52612	-0.75	0	0	0	0	0	0	1	0	0	0	-5.0178	0	1.01947	0	0	0	0	1	0	7.22078	0	0	1
984	0	23.4102	0	0	0	41.05	28.5461	0	49.1017	1	0	1	0	41.05	0	20.9594	0	0	0	0	69.6662	5	2	5.14805	8.38746	1.5	0	0	0	0	0	0	1	0	0	1	-5.95221	0	0.867045	0	4	0	0	4	0	10.8718	0	0	5
985	0	11.5455	0	0	0	20.23	11.4634	0	18.6579	0	0	0	0	20.23	0	8.66685	0	0	0	0	42.6833	1	1	3.92963	3.31346	-0.25	0	0	0	0	0	9.92963	0	0	0	0	-3.64148	1	0.888112	1	0	0	0	0	3.22581	5.07692	0	1	1
986	0	19.1946	0	0	0	32.7	5.37363	0	31.0288	0	0	1	0	32.7	0	14.6133	0	0	0	0	56.8075	3	1	5.18899	5.18481	-5	0	0	1	0	0	11.189	1	0	0	0	-3.12727	2	1.01024	3	0	1	4	1	4.54545	7.26316	0	0	3
988	0	16.5009	0	0	0	21.26	17.2449	0	36.5057	1	0	1	0	21.26	0	33.2209	0	0	0	0	73.891	5	2	4.56453	4.61086	-0.75	0	0	0	0	0	0	1	0	0	1	-4.44091	1	0.750043	2	0	0	0	1	2.5	6.94372	0	0	5
989	0	35.92	0	0	13.8108	43.78	18.9983	0	70.2892	0	0	1	1	43.78	1	29.231	0	1	0	0	74.0769	5	3	6.81079	10.2253	-1.25	0	0	1	0	0	11.2659	1	1	0	0	-5.67918	2	1.05647	2	0	0	5	2	2.98507	8.8164	0	0	4
990	31.6995	19.3277	0	0	0	35.16	5.32096	1	36.319	0	1	1	0	63.4	1	9.56182	1	0	0	0	41.0449	5	1	2.01073	8.09547	-2.5	0	0	0	0	0	0	1	0	0	0	-4.09534	0	0.878534	0	1	0	0	4	0	12.2554	0	0	4
991	0	6.60412	0	0	0	0	14.9718	0	6.60412	0	0	0	0	0	0	0.982778	0	0	0	0	0	0	0	0.245694	0.676777	-3	0	0	0	0	0	0	0	0	0	0	-2.6638	0	0.943446	0	0	0	0	0	0	2.66667	0	0	0
994	0	17.5629	0	0	0	6.48	15.0253	0	33.8368	0	0	1	0	6.48	0	5.5893	0	0	0	0	6.24863	2	2	0.515046	6.25246	-0.5	0	0	0	0	0	0	1	0	0	0	-4.36603	0	0.83633	0	0	0	0	2	0	12.2905	0	0	2
995	0	8.40873	0	0	0	0	17.664	0	8.40873	0	0	0	0	0	0	1.65009	0	0	0	0	0	0	0	0.287361	0.802586	-3.5	0	0	0	0	0	0	0	0	0	0	-2.94029	0	1.05109	0	0	0	0	0	0	2.82143	0	0	0
997	64.2837	27.0328	0	0	12.9369	38.77	12.3629	1	49.0843	0	0	1	1	38.77	1	21.8404	0	0	0	0	50.269	4	2	5.93693	8.69483	-3	0	0	0	0	0	0	1	1	0	0	-4.77648	3	0.965458	5	0	1	5	1	5.26316	10.6746	0	0	4
998	0	22.2137	0	0	13.1744	20.31	16.8342	0	42.4395	1	0	1	0	20.31	1	14.2731	0	0	0	0	28.2692	2	2	6.17441	6.1261	0.5	0	0	0	0	0	0	1	0	0	0	-4.35417	1	0.965812	1	0	0	4	1	2	6.02372	0	0	2
999	0	17.0807	0	0	0	3.24	22.6646	0	33.8368	0	0	1	0	3.24	1	5.34726	0	0	0	0	3.12431	1	2	0.41963	6.25246	1.25	0	0	0	0	0	0	1	0	0	0	-4.80936	0	0.813366	0	0	0	0	1	0	12.2905	0	0	1
1001	0	7.15317	0	0	0	12.03	6.47835	0	13.0811	1	0	0	0	12.03	0	2.86657	0	0	0	0	18.0108	1	1	0.713399	2.15854	0	0	0	0	0	0	0	1	0	0	0	-2.35244	0	0.650288	0	0	0	0	1	0	4.8	0	0	1
1003	0	9.84231	0	0	0	0	20.431	0	9.84231	0	0	0	0	0	0	1.70886	0	0	0	0	0	0	0	0.297565	0.979363	-4	0	0	0	0	0	0	0	0	0	0	-3.19363	0	1.09359	0	0	0	0	0	0	3.16667	0	0	0
1004	50.8803	20.2875	0	0	0	36.26	10.8914	1	42.0795	0	0	1	0	36.26	0	22.9795	0	0	0	0	60.1437	4	2	5.36732	6.98578	0.25	0	0	0	0	0	0	1	0	0	1	-4.20048	1	0.845313	2	0	0	2	2	2.22222	8.60145	0	0	4
1005	94.6204	21.348	0	0	12.154	44.81	9.47825	2	44.0546	0	0	1	0	44.81	1	17.659	0	1	1	0	60.4042	5	2	5.15402	8.89246	-1.75	1	0	0	1	0	0	1	1	0	0	-4.43337	2	0.85392	3	1	0	6	3	4.16667	11.3367	0	0	5
1006	0	17.806	0	0	0	8.17	14.1971	0	34.0603	0	1	1	0	36.41	0	7.50077	0	0	0	0	6.24863	4	2	2.09827	7.41301	-0.25	0	0	0	0	0	0	1	0	0	0	-4.88892	0	0.847905	0	0	0	0	2	0	11.6571	0	0	2
1008	0	15.8649	0	0	0	15.27	13.278	0	31.1348	0	0	1	0	15.27	0	5.85418	0	0	0	0	21.1351	2	2	0.744175	6.12069	0.25	0	0	0	0	0	0	1	0	0	0	-4.03603	0	0.793243	0	0	0	0	2	0	12.2526	0	0	2
1009	0	15.6697	0	0	0	8.17	10.6428	0	31.1782	0	1	1	0	36.41	0	4.83671	0	0	0	0	6.24863	3	2	0.462963	7.00569	0.5	0	0	0	0	0	0	1	0	0	0	-4.27153	0	0.783487	0	0	0	0	2	0	11.5632	0	0	2
1010	0	13.2838	0	0	0	12.47	10.6428	0	28.6146	1	0	1	0	12.47	0	7.19497	0	0	0	0	14.1242	2	2	2.58338	4.74274	0.75	0	0	0	0	0	0	1	0	0	0	-3.54443	1	0.699147	2	0	0	0	1	2.5	6.54971	0	0	2
1011	0	16.094	0	0	0	16.96	12.4632	0	31.3526	0	1	1	0	45.2	0	7.80857	0	0	0	0	21.1351	4	2	2.07099	7.28125	0.5	0	0	0	0	0	0	1	0	0	0	-4.5577	0	0.804699	0	0	0	0	2	0	11.6	0	0	2
1012	0	17.5293	0	0	0	12.03	26.5126	0	32.0879	1	0	1	0	12.03	0	11.3588	0	0	0	0	18.0108	3	2	2.06069	6.59608	0	0	0	0	0	0	0	1	0	0	0	-5.46887	0	0.876464	0	0	0	0	1	0	9.48421	0	0	1
NAME	D/Dtr05	Eta_C	nRCOOH	nC(=N)N2	mindO	TPSA(NO)	MLOGP2	nR05	Eta_R	C-008	S-107	B07[C-N]	B10[C-O]	TPSA(Tot)	nDB	DELS	C-034	B02[N-O]	B02[O-O]	F09[N-Br]	SAacc	nHet	nBnz	MAXDP	X4sol	Eta_D_beta	nArOCON	nN(CO)2	nOHt	C-041	SaaO	minsOH	B05[C-N]	B09[C-O]	B09[N-Br]	B10[C-F]	ESOL	nO	Eta_C_A	F01[C-O]	F02[N-N]	F05[O-O]	F06[C-O]	nN	O%	MeanDD	nArCONR2	nArOH	nHAcc
9	0	39.9773	0	0	10.7805	285.14	12.3836	0	76.4884	8	0	1	1	301.9	5	105.028	0	1	1	0	473.481	20	0	4.62525	8.87448	-16	0	0	0	0	0	8.6781	1	1	0	0	1.00973	17	1.1758	14	0	17	27	1	28.8136	9.23529	0	0	18
10	47.1556	10.1719	0	1	0	117.75	0.83257	1	25.2767	0	1	1	0	145.99	1	22.0446	0	0	0	0	184.732	7	1	3.37171	5.23309	2	0	0	0	1	0	9.19206	1	1	0	0	-2.34195	2	0.598344	2	4	0	2	4	7.40741	6.55147	0	2	6
17	77.9805	33.5542	0	0	12.912	113.42	2.28023	1	68.4361	0	0	1	1	121.8	4	48.8378	1	1	1	0	136.56	11	1	6.32946	11.6684	-5.25	0	0	0	0	0	0	1	1	0	0	-3.67516	4	1.01679	3	1	0	7	6	6.34921	10.6837	0	0	9
18	124.876	15.3493	0	0	0	127.39	10.8534	2	40.8828	0	0	1	1	127.39	0	25.3579	1	0	0	0	170.118	9	1	3.29034	7.7572	1.75	0	0	0	0	5.28073	9.29034	1	1	0	0	-3.61024	2	0.613972	3	10	0	2	7	5	10.2467	0	1	8
22	0	19.3877	0	0	11.1244	81.7	10.4885	0	47.1726	0	0	1	1	81.7	4	33.287	0	1	1	0	115.445	6	2	4.92907	6.39146	2.75	0	0	0	0	0	0	1	1	0	0	-3.6343	5	0.718063	7	0	2	11	1	10.4167	8.62678	0	0	6
28	0	16.3718	0	0	10.7582	101.22	3.4646	0	37.8543	0	0	1	1	101.22	5	37.6324	0	0	1	0	130.047	7	1	5.05539	6.23275	0.25	0	0	0	0	0	0	1	1	0	0	-3.04863	5	0.744173	4	0	0	4	2	13.1579	7.48918	0	0	6
30	0	56.8293	0	0	13.3571	101.9	10.8174	0	91.1729	3	1	1	1	127.2	2	49.0853	0	1	0	0	174.802	8	2	6.54059	11.8768	-8.75	0	0	0	0	0	10.1532	1	1	0	0	-5.58426	4	1.38608	4	0	2	12	3	4.54545	12.2293	0	1	7
37	56.9209	16.294	0	0	12.9069	81.93	12.5246	1	40.6122	0	0	1	1	81.93	1	22.7472	0	1	0	0	104.022	7	2	5.90686	8.06806	3	0	0	0	0	0	0	1	1	0	0	-4.01702	2	0.678916	3	5	1	4	5	5.12821	12.1196	0	0	6
39	0	191.749	0	0	13.8911	278.8	0.103067	0	304.744	11	0	1	1	278.8	12	180.335	0	1	0	0	413.191	23	0	8.16336	20.9923	-35.25	0	0	0	0	0	12.0192	1	1	0	0	-7.73616	12	2.25587	12	0	12	44	11	6.12245	25.8725	0	0	23
43	0	28.1448	0	0	0	62.16	13.718	0	63.6126	0	0	1	1	62.16	0	26.8693	0	0	0	0	110.491	5	4	3.92681	10.3165	2.75	0	0	0	0	0	9.69843	1	1	0	0	-6.1782	4	0.82779	6	0	1	7	1	6.34921	13.1604	0	2	5
46	52.4019	15.2899	0	0	11.278	133.08	0.324337	1	30.6812	2	0	1	0	133.08	5	34.1012	0	1	0	0	173.321	9	0	4.70027	5.37731	-6.25	0	1	0	1	0	9.14227	1	0	0	0	-1.23925	4	0.80473	5	2	0	4	5	12.5	6.74854	0	0	8
47	0	191.765	0	0	13.8839	278.8	0.103067	0	304.564	11	0	1	1	278.8	12	180.326	0	1	0	0	413.191	23	0	8.12954	21.2249	-35.25	0	0	0	0	0	12.0888	1	1	0	0	-7.75178	12	2.25606	12	0	12	43	11	6.12245	25.8784	0	0	23
51	93.3254	13.0208	0	0	10.8092	143.72	4.38411	2	26.2597	3	0	1	0	143.72	1	35.821	0	1	0	0	230.418	9	0	3.8092	4.80539	-6	0	0	0	0	0	8.89203	1	0	0	0	0.399221	5	0.765931	6	1	1	4	4	17.2414	6.125	0	0	8
62	0	11.3544	0	0	10.9063	84.22	4.26465	0	31.4969	0	0	1	1	84.22	2	22.1806	0	1	0	0	119.209	5	2	5.04579	5.07285	4.25	0	0	0	0	0	0	1	1	0	0	-2.88217	2	0.567722	2	0	0	2	3	5.71429	7.24737	0	0	5
64	0	100.232	0	0	12.9782	221.29	5.39271	0	186.389	7	0	1	1	221.29	7	147.919	0	1	1	0	351.93	15	3	8.4838	20.408	-11.25	0	0	1	0	0	11.7799	1	1	0	0	-6.01547	14	1.61664	19	0	14	72	1	12.3894	17.6378	0	0	15
65	0	38.6812	0	0	11.9669	164.63	0.816305	0	76.927	1	0	1	1	164.63	5	77.8148	0	1	0	0	285.314	10	1	6.68344	12.3525	-7	0	0	1	0	0	10.4649	1	1	0	0	-2.30536	7	1.17216	7	0	3	24	3	11.6667	15.5114	0	1	10
85	71.7172	16.532	0	0	11.0194	86.34	5.92532	1	42.9178	0	0	1	1	86.34	4	22.6876	0	0	1	0	105.453	7	1	4.01944	7.28024	2	0	0	0	0	0	0	1	1	0	0	-3.62249	2	0.661278	0	1	0	4	5	4.54545	9.28333	0	0	6
87	136.422	15.9931	0	0	10.9797	86.59	5.17185	2	40.269	0	0	1	1	86.59	4	23.9495	2	0	1	0	98.1749	7	1	3.97972	7.06131	0.5	0	0	0	0	5.84619	0	1	1	0	0	-3.65126	3	0.666377	2	1	0	5	4	7.14286	8.82246	0	0	6
91	37.4146	38.5846	0	0	11.8954	94.83	2.61875	1	52.4583	1	0	0	1	94.83	3	48.342	0	0	0	0	178.34	5	0	5.36157	9.71611	-11.25	0	0	1	0	0	9.37226	0	1	0	0	-3.09707	5	1.48402	5	0	1	10	0	8.92857	14.3908	0	0	5
95	0	5.64508	0	0	0	38.05	3.44428	0	10.9279	0	0	1	0	38.05	0	3.02426	0	0	0	0	50.6629	2	1	1.12635	1.96861	0.75	0	0	0	0	0	0	1	0	0	0	-1.6223	0	0.564508	0	0	0	0	2	0	4.82222	0	0	2
101	114.448	15.42	0	0	0	61.42	14.1537	2	38.1477	1	0	1	0	61.42	0	13.2077	1	0	0	0	66.652	7	2	1.90575	7.7325	2.75	0	0	0	0	0	0	1	0	0	0	-4.37113	0	0.670435	0	3	0	0	6	0	8.81028	0	0	4
102	45.3297	13.5245	0	0	11.949	65.25	4.22206	1	32.2049	0	1	1	0	93.49	2	23.28	1	1	0	0	91.0006	6	1	4.94902	7.33472	4.25	0	0	0	0	0	0	1	0	0	0	-4.02015	1	0.676226	1	0	0	4	3	3.57143	9.94737	0	0	4
103	0	20.599	0	0	0	24.5	7.83388	0	31.4806	1	0	1	0	24.5	0	9.49952	0	0	0	0	32.135	3	1	2.35912	4.93519	-6.25	0	0	0	0	0	0	1	0	0	0	-3.29002	1	0.980907	2	0	0	4	2	1.96078	8.10476	0	0	3
105	90.4659	20.2743	0	0	11.7001	54.34	3.08574	2	38.4209	0	0	1	1	54.34	2	21.747	2	1	0	0	71.4249	5	1	5.28352	7.94105	-4.5	0	0	0	0	0	0	1	1	0	0	-2.91034	2	0.881489	2	0	0	2	3	4.54545	11.8498	0	0	4
106	0	27.4014	0	0	12.8336	61.6	12.3942	0	59.1083	1	0	1	1	61.6	1	19.5248	0	1	0	0	82.3015	5	3	5.8336	9.03892	0.5	0	0	0	0	0	0	1	1	0	0	-4.97448	1	0.856295	1	0	0	3	4	1.5625	10.5665	0	0	5
117	112.4	31.694	0	0	12.908	61.6	15.3215	1	63.8946	0	0	1	1	61.6	1	20.4133	0	1	0	0	82.3015	5	3	5.90799	10.4922	-1	0	0	0	0	0	0	1	1	0	0	-5.50596	1	0.932178	1	0	0	3	4	1.47059	11.2834	0	0	5
120	0	7.43137	1	0	10.1098	63.32	2.81386	0	11.0379	1	0	0	0	63.32	1	13.267	0	0	1	0	100.725	3	0	3.10977	1.01574	-3.25	0	0	0	0	0	8.30588	0	0	0	0	-0.401948	2	0.825708	2	0	0	0	1	9.09091	2.66667	0	0	3
123	0	7.67868	0	1	0	50.41	9.5384	0	21.6296	0	0	0	0	50.41	1	7.06477	0	0	0	0	67.6935	3	2	1.77663	4.07998	4.75	0	0	0	1	0	0	1	0	0	0	-3.35971	0	0.479918	0	3	0	0	3	0	6.725	0	0	3
126	0	15.706	0	0	0	50.72	3.35081	0	28.9056	2	0	1	0	50.72	1	18.334	0	0	0	0	82.6939	4	1	3.78185	3.77163	-3.25	0	0	0	0	0	9.78185	1	1	0	0	-2.26859	3	0.826629	5	0	0	6	1	7.14286	6.84211	0	0	4
136	35.3102	9.17442	0	0	0	36.42	7.07449	1	18.7406	0	0	0	0	36.42	1	12.2051	0	0	0	0	52.807	5	1	1.87025	4.56323	-1.5	0	0	0	0	0	0	1	0	0	0	-3.28896	0	0.655315	0	3	0	0	3	0	6.31868	0	0	3
145	0	102.182	0	0	12.9763	221.29	7.12919	0	190.754	7	0	1	1	221.29	7	158.857	0	1	1	0	366.89	16	3	8.48164	20.408	-12	0	0	1	0	0	11.7641	1	1	0	1	-6.28181	14	1.62194	19	0	14	72	1	12.3894	17.7204	0	0	16
146	92.8708	29.0485	0	0	12.9125	32.78	9.24109	1	48.9355	0	1	1	1	61.02	1	18.251	1	1	0	0	42.3934	5	1	5.91252	8.439	-4.75	0	0	0	0	0	0	1	1	0	0	-4.15702	2	1.07587	3	0	1	6	2	3.50877	7.59259	0	0	4
147	0	15.7538	0	0	0	29.26	17.7532	0	32.8265	0	1	1	0	54.56	0	18.5183	0	0	0	0	50.9816	5	2	5.56354	6.05781	1	0	0	0	0	0	0	1	0	0	0	-4.6737	0	0.787688	0	0	0	0	2	0	7.72105	0	0	3
154	32.9189	21.736	0	0	0	23.96	9.35788	1	35.855	1	0	1	0	56.05	2	12.6003	0	0	0	0	24.2594	5	1	2.14836	7.28205	-4.75	0	0	0	1	0	0	1	0	0	0	-4.50632	0	1.03505	0	1	0	0	3	0	10.9143	0	0	3
160	0	17.3024	0	0	12.3817	65.25	14.0574	0	49.1951	0	0	1	1	65.25	2	23.5865	0	1	0	0	91.0006	4	3	5.38166	8.3637	10	0	0	0	0	0	0	1	1	0	0	-5.30935	1	0.617942	1	0	0	4	3	2.32558	11.8148	0	0	4
169	22.6082	16.3713	0	0	0	41.49	6.60773	1	33.1674	0	0	0	0	41.49	0	17.8271	0	0	0	0	71.694	3	2	5.23836	7.52139	-0.25	0	0	1	0	0	11.2384	1	0	0	0	-3.63395	2	0.818565	3	0	0	2	1	5.40541	14.5211	0	0	3
170	0	23.7568	0	0	0	35.94	6.93751	0	44.0451	1	0	1	1	35.94	0	17.1362	0	0	0	0	59.9319	5	2	2.77909	7.23279	-4.5	0	0	0	0	0	8.77909	1	1	0	0	-3.80064	2	0.913724	3	0	0	0	2	3.77358	8.18154	0	0	4
172	28.8532	7.97387	0	0	0	16.13	1.61918	1	14.6149	1	0	0	0	16.13	0	3.80713	0	0	0	0	19.9098	2	0	1.13704	3.43676	-1.75	0	0	0	0	0	0	1	0	0	0	-2.13048	0	0.664489	0	0	0	0	2	0	5.95455	0	0	2
173	0	7.77557	0	0	0	27.03	4.55213	0	16.6296	0	0	1	0	27.03	0	5.91758	0	0	0	0	34.1837	2	1	2.4809	2.84504	2	0	0	0	0	0	0	1	0	0	0	-2.4698	0	0.598121	0	0	0	0	2	0	4.94872	0	0	2
197	0	18.002	0	0	12.6657	29.1	18.3694	0	35.0978	0	0	0	0	29.1	1	13.0957	0	1	0	0	43.1557	2	2	5.66571	5.61458	1.25	0	0	0	0	0	0	1	0	0	0	-4.38622	1	0.818274	1	0	0	3	1	2.12766	6.94372	0	0	2
198	72.1364	29.6418	0	0	0	12.47	26.8236	1	49.9126	4	0	1	0	12.47	0	29.7704	0	0	0	0	44.0444	4	2	5.4237	8.16204	-5.25	0	0	0	0	0	0	1	0	0	1	-5.68724	1	1.05863	2	0	0	1	1	1.75439	9.31746	0	0	4
199	0	12.2595	0	0	12.315	55.12	11.3782	0	32.8016	0	0	1	0	55.12	1	14.7179	0	1	0	0	76.0529	3	3	5.31503	6.1319	5.5	0	0	0	0	0	0	1	0	0	0	-3.91694	1	0.583786	1	0	0	4	2	2.7027	9.45714	0	0	3
203	0	26.6398	0	0	12.439	44.81	11.5143	0	54.0891	0	0	1	1	44.81	1	18.5455	0	1	0	0	60.4042	5	3	5.43903	9.00718	-1.25	0	0	0	0	0	0	1	1	0	0	-4.71556	2	0.859348	3	0	0	3	3	3.22581	11.9097	0	0	5
210	0	7.07893	0	0	0	0	14.9718	0	7.07893	0	0	0	0	0	0	1.60315	0	0	0	0	0	0	0	0.309028	0.696923	-3	0	0	0	0	0	0	0	0	0	0	-2.68318	0	1.01128	0	0	0	0	0	0	2.38095	0	0	0
218	0	18.3132	0	0	0	12.47	17.1748	0	34.6658	0	0	1	0	12.47	0	11.9413	0	0	0	0	14.1242	3	2	2.70743	7.47773	-1	0	0	0	0	0	0	1	0	0	0	-5.09533	1	0.872055	2	0	0	1	1	2.5641	15.3619	0	0	2
220	0	24.0523	0	0	0	42.52	7.80103	0	48.5651	2	0	1	1	42.52	0	35.9252	0	0	0	0	102.902	7	2	4.49373	6.89157	-4.25	0	0	0	0	0	0	1	1	0	1	-4.71839	2	0.890824	4	0	1	5	2	4	9.79487	0	0	7
223	0	31.3174	0	0	12.0767	44.37	21.1793	0	55.9255	1	0	1	1	44.37	1	43.6287	0	1	0	0	109.171	8	2	5.07671	7.5011	-5.25	0	0	0	0	0	0	1	1	0	1	-5.88655	1	1.01024	1	0	0	1	3	1.72414	10.3613	0	0	7
226	0	15.6597	0	0	0	6.48	10.0647	0	22.8009	1	0	1	0	6.48	0	5.28693	0	0	0	0	6.24863	3	1	0.544838	4.54032	-3.5	0	0	0	0	0	0	1	0	0	0	-4.11996	0	0.978731	0	0	0	0	2	0	6.525	0	0	2
232	0	22.5496	0	1	12.2776	92.79	4.09423	0	47.5226	0	0	1	1	92.79	3	23.9825	0	1	0	0	122.523	7	0	5.27761	7.39397	-1.25	0	0	0	1	0	0	1	1	0	0	-3.1027	2	0.805341	3	3	0	3	5	3.77358	9.96561	0	0	7
236	115.13	41.4953	2	0	11.2015	219.93	0.190256	1	76.5605	0	4	1	1	321.13	7	75.374	0	1	1	0	325.867	19	0	6.18236	14.9693	-9	0	0	0	0	0	9.11277	1	1	0	0	-2.41871	8	1.15265	9	3	3	11	7	15.0943	10.219	0	0	14
238	374.237	59.3519	0	0	12.8293	133.75	2.77183	2	108.897	3	2	1	1	190.23	3	58.6623	1	1	1	0	201.835	12	2	6.53676	13.5177	-5.25	0	0	0	2	0	11.5946	1	1	0	0	-5.75558	5	1.2365	6	1	3	20	5	5.37634	10.5293	0	0	10
254	69.3214	20.2706	0	0	11.3062	103.45	2.92268	1	48.9736	0	0	1	1	103.45	2	29.0238	1	1	1	0	119.12	9	1	5.88523	8.45286	-2	1	0	0	1	0	0	1	1	0	0	-3.3953	3	0.723952	4	4	0	6	6	6.25	10.3704	1	0	8
256	130.237	44.6693	1	0	10.9751	111.79	16.7905	1	93.5629	2	0	1	1	111.79	2	58.6234	2	1	1	0	211.311	8	3	7.04831	12.0421	0.75	0	0	0	0	0	8.97306	1	1	0	1	-6.11117	5	1.08949	5	0	0	12	2	6.57895	9.78537	0	0	7
257	52.0085	20.6414	1	0	11.1916	66.84	5.82533	1	36.9515	3	0	1	1	66.84	2	30.3204	0	0	1	0	107.097	5	1	5.27625	6.68741	-5	0	0	0	0	0	9.18883	1	1	0	0	-2.98338	4	0.938246	5	0	2	11	1	9.30233	8.50216	0	0	5
264	0	13.2396	1	0	10.8273	49.33	15.9004	0	30.162	0	0	0	0	49.33	1	22.455	0	0	1	0	85.839	5	2	3.82734	5.79241	2.5	0	0	0	0	0	8.88672	0	1	0	0	-4.61325	2	0.696819	2	0	0	4	1	6.66667	7.74269	0	0	3
265	68.6508	11.9244	0	0	11.4752	93.03	0.541312	2	24.591	1	0	1	0	93.03	2	23.4896	0	1	0	0	130.41	7	0	4.47522	5.6134	-5.25	0	0	0	0	0	9.0182	1	0	0	0	-1.35777	3	0.701436	4	3	0	3	4	10.3448	8.48529	0	0	6
267	53.0987	21.2972	1	0	11.2997	66.84	10.6873	1	46.079	1	0	0	1	66.84	2	34.2567	0	1	1	0	107.097	6	2	6.02137	7.8211	0.25	0	0	0	0	0	9.26682	1	1	0	0	-4.45505	4	0.851889	5	0	0	11	1	9.30233	9.41	1	0	5
268	0	7.11568	0	0	10.6487	37.3	10.5639	0	20.4463	0	0	0	0	37.3	1	12.79	0	0	1	0	67.8283	2	2	3.64874	3.88862	5	0	0	0	0	0	8.74627	0	1	0	0	-3.49393	2	0.474379	2	0	0	2	0	8	6.4381	0	0	2
269	72.5097	18.0665	0	0	10.3493	86.26	0.433524	1	32.7157	0	1	1	1	111.56	3	19.3269	2	0	1	0	99.4001	8	0	3.34927	5.02771	-5.5	0	0	0	0	5.69998	0	1	1	0	0	-1.98299	3	0.860308	2	1	0	2	4	6.97674	6.77619	0	0	6
273	67.9439	15.6471	0	0	10.3741	86.59	1.1249	1	30.8642	0	1	1	1	111.89	3	20.5987	1	0	1	0	98.1749	8	0	3.37413	4.93932	-4	0	0	0	0	5.64137	0	1	1	0	0	-2.14405	3	0.782357	2	1	0	3	4	7.5	6.43684	0	0	6
279	56.6163	39.3864	0	0	13.0857	71.85	4.35552	1	66.6524	1	0	1	1	80.23	3	42.4052	2	1	1	0	86.7064	8	1	6.26628	11.7264	-9.25	0	0	0	0	0	0	1	1	0	0	-4.49076	4	1.19353	3	0	0	7	3	5.88235	13.0511	1	0	6
284	161.056	57.1734	0	0	13.7298	114.45	7.48821	2	101.963	4	0	1	1	114.45	7	64.4049	0	1	1	0	174.512	10	1	7.22046	17.2416	-13.75	0	0	0	0	0	12.0801	1	1	0	0	-4.70041	5	1.29939	6	0	4	20	5	6.0241	18.6459	0	0	10
297	269.243	39.0954	0	0	12.3767	61.88	11.5641	3	76.4359	2	0	1	1	70.26	2	33.792	0	1	1	0	77.9665	7	3	5.37667	13.4742	-1.75	0	0	0	0	0	0	1	1	0	0	-5.31223	3	1.05663	2	0	0	6	3	4.16667	12.5135	0	0	6
299	107.498	13.9416	0	0	0	46.5	9.75522	2	35.3011	1	0	1	0	46.5	0	11.1197	1	0	0	0	33.5711	5	2	2.06322	7.66947	3	0	0	0	0	0	0	1	0	0	0	-4.26973	0	0.63371	0	2	0	0	4	0	8.75758	0	0	2
309	103.725	34.1895	0	0	13.2982	91.48	8.10042	1	63.0198	1	0	1	1	91.48	1	54.9698	0	1	0	0	168.566	8	1	6.29822	9.11252	-6.5	0	0	1	0	0	11.5107	1	1	0	0	-4.12709	2	1.06842	2	1	0	3	4	3.22581	9.14718	0	0	8
310	37.0637	9.25847	0	1	0	36.42	5.72067	1	18.5384	0	0	0	0	36.42	1	8.78356	0	0	0	0	52.807	4	1	1.74884	4.02169	-1.25	0	0	0	1	0	0	1	0	0	0	-2.9562	0	0.661319	0	3	0	0	3	0	6.18681	0	0	3
314	0	45.9821	0	0	12.5999	206.07	0.666314	0	92.9806	4	0	1	1	206.07	3	101.853	0	0	1	0	354.748	12	2	6.64306	13.7952	-7.25	0	0	1	0	0	9.516	1	1	0	0	-2.74106	11	1.17903	14	0	9	30	1	16.1765	16.6964	0	2	12
317	51.7734	26.667	0	0	13.3286	63.91	9.06819	1	60.3562	0	1	1	1	92.15	2	22.9431	1	1	0	0	81.7501	7	1	6.32861	11.5994	3.25	0	0	0	0	0	0	1	1	0	0	-5.33986	1	0.833343	1	1	0	3	5	1.81818	13.5282	1	0	6
319	69.9763	33.0166	0	0	12.9648	71.5	9.06446	1	57.5151	1	0	1	1	71.5	3	39.1771	1	1	0	0	115.33	7	1	5.96482	10.2703	-8.25	0	0	0	0	5.57918	10.162	1	1	0	1	-4.60766	3	1.06505	4	1	1	3	3	5.08475	12.9398	0	0	7
321	63.1944	15.9465	1	0	10.9901	92.86	2.06456	1	31.7821	2	0	1	1	92.86	2	30.5881	0	0	1	0	142.828	6	1	4.8897	5.12661	-3.5	0	0	0	0	0	9.00614	1	1	0	0	-2.04552	4	0.797324	4	0	0	6	2	10.5263	7.06316	0	0	6
324	0	39.4799	0	0	11.5671	120.24	12.3443	0	66.5008	0	0	1	1	120.24	2	39.7386	0	1	0	0	165.066	9	0	5.76831	9.4288	-9.5	0	0	0	0	0	0	1	1	0	0	-4.41378	3	1.16117	4	2	0	6	6	4.28571	10.205	0	0	9
329	122.409	56.0811	0	0	13.5388	118.03	2.97523	1	101.431	4	0	1	1	118.03	2	52.8573	0	1	0	0	194.712	9	2	6.80963	13.3118	-7.5	0	0	0	0	0	10.7891	1	1	0	0	-4.49206	4	1.24625	4	0	2	11	5	4.34783	12.0333	0	0	9
333	59.1543	22.9396	0	0	0	87.89	12.1667	1	46.0038	2	0	1	1	87.89	0	20.3885	0	0	0	0	129.061	7	1	3.47355	7.52061	-2.5	0	0	0	0	0	9.47355	1	1	0	0	-3.88791	1	0.882293	1	6	0	2	6	1.92308	9.85538	0	0	6
335	107.528	35.1717	0	0	12.1654	85.49	7.56152	1	60.2764	0	0	1	1	85.49	3	31.336	0	1	0	0	106.623	9	1	6.18466	9.25717	-9.5	0	0	0	1	0	0	1	1	0	0	-3.74642	3	1.13457	4	3	1	8	6	4.61538	8.29032	0	0	9
336	14.7655	4.13613	0	0	0	57.36	0.310743	1	11.3143	0	0	0	0	89.45	2	7.59593	1	0	0	0	51.5818	5	0	1.23838	3.41064	0	0	0	0	0	0	0	0	0	0	0	-1.50447	0	0.413613	0	3	0	0	4	0	6.95556	0	0	3
338	0	33.8823	1	0	12.3937	64.33	17.8721	0	61.1218	1	0	1	1	64.33	1	38.6723	0	0	1	0	116.972	5	2	5.39371	9.92888	-2.25	0	0	0	0	0	10.174	1	1	0	1	-5.61987	2	1.09298	2	0	0	4	2	3.33333	9.06667	0	0	5
347	63.3242	16.9012	0	0	10.9155	78.01	3.39021	1	30.1728	0	1	1	1	103.31	1	19.69	0	0	1	1	102.625	7	0	3.91554	6.31238	-0.5	0	0	0	0	0	8.95777	1	1	1	0	-3.38394	2	0.845058	2	1	0	2	3	5.88235	7.89474	0	0	4
349	63.3242	15.932	0	0	10.7098	86.53	4.7439	1	30.1728	0	1	1	1	111.83	2	20.0934	0	0	1	0	85.5432	8	0	3.70984	6.31238	0.75	0	0	0	0	0	0	1	1	0	0	-3.70449	2	0.796599	0	1	0	2	4	6.06061	7.89474	0	0	4
352	84.542	22.8165	0	0	12.4205	80.93	1.94802	1	50.7153	0	0	1	1	80.93	1	28.7736	1	1	0	0	96.4717	8	1	5.42053	8.99111	-2.75	0	0	0	0	5.21301	0	1	1	0	0	-3.6607	4	0.814875	7	3	0	3	4	8	10.4841	1	0	8
356	229.942	35.5681	0	0	11.5533	69.06	8.99606	2	70.344	1	0	1	1	69.06	1	37.3735	0	1	1	0	81.1787	10	2	4.55334	12.0473	-6.5	0	0	0	0	0	0	1	1	0	0	-5.22763	4	0.988001	7	1	0	9	4	6.25	10.7429	0	0	7
363	20.6272	10.1548	0	0	11.8779	49.41	1.45586	1	21.648	0	0	0	0	57.79	2	20.2	0	1	1	0	63.8423	5	1	4.87787	6.53194	-0.5	0	0	0	0	0	0	1	0	0	0	-2.34806	2	0.676986	0	1	0	0	2	7.40741	10.3333	0	0	4
369	128.637	37.832	0	0	12.5743	131.19	1.2555	1	73.5428	3	0	1	1	139.57	3	58.3771	0	1	1	0	186.567	10	2	6.39596	10.2279	-4.75	0	0	0	1	0	11.1966	1	1	0	0	-3.51925	6	1.08091	6	0	5	14	3	8.57143	8.13613	0	0	9
378	0	8.58719	0	0	10.023	61.77	0.659039	0	15.6096	0	0	0	0	61.77	2	18.6735	0	1	0	0	90.692	7	0	3.92688	2.31106	-4.5	0	0	0	1	0	0	1	0	0	0	-1.77129	2	0.715599	1	1	0	1	3	9.52381	3.42424	0	0	5
380	102.068	28.1686	0	0	13.955	43.78	12.2795	1	59.9355	2	0	1	1	43.78	1	23.0291	0	1	0	0	74.0769	4	3	6.95501	9.34472	0.5	0	0	0	0	0	9.9942	1	1	0	0	-4.72281	2	0.908664	2	0	0	7	2	3.27869	8.18925	0	0	4
381	63.2135	17.8914	0	0	12.8694	40.62	13.6848	1	39.4533	0	0	0	0	40.62	2	23.6042	0	1	0	0	56.2934	4	2	5.86939	7.24162	2	0	0	0	0	0	0	1	0	0	0	-4.2531	2	0.777886	2	0	0	8	2	4.65116	7.83399	0	0	4
383	0	16.4629	1	0	10.6866	66.56	0.0254475	0	29.857	1	0	1	1	66.56	1	22.6193	0	0	1	0	103.85	6	1	3.68661	4.4214	-3.5	0	0	0	0	0	8.76352	1	1	0	0	-2.45563	2	0.866467	2	0	0	4	2	5.40541	5.82456	0	0	4
388	24.9595	7.16753	0	0	10.842	108.17	0.00642617	1	20.015	0	0	1	0	108.17	3	22.1419	0	1	0	0	136.178	8	0	4.39548	4.17946	-1.25	0	0	0	1	0	0	1	0	0	0	-1.26349	2	0.511967	2	4	0	0	6	10	7.34066	0	0	7
389	0	24.4481	0	0	11.1266	80.47	11.6726	0	51.555	1	0	1	1	88.85	3	55.4205	0	1	1	0	135.4	8	2	5.81117	8.08292	-0.75	0	0	0	0	0	0	1	1	0	1	-4.09409	3	0.873148	1	0	0	4	2	6	8.94444	0	0	7
391	0	28.9262	0	0	12.5838	53.09	10.6874	0	57.7011	0	0	1	1	53.09	2	38.4297	0	1	0	0	85.6228	7	2	5.67728	8.93084	-5	0	0	0	0	0	0	1	1	0	1	-4.51109	3	0.903943	4	0	1	8	3	4.83871	10.5242	1	0	7
395	47.8328	18.5282	0	0	11.3695	52.57	4.38448	1	31.4561	0	0	1	1	52.57	1	18.8601	0	1	0	0	88.9633	4	1	4.36952	5.59442	-3.75	0	0	0	0	0	9.9736	1	1	0	0	-2.82594	2	0.926411	2	0	1	1	2	4.54545	7.97368	0	1	4
397	0	23.4366	1	0	11.2294	65.78	3.63081	0	50.1611	0	0	1	1	65.78	3	62.8045	0	0	1	0	147.226	9	1	7.18344	7.04833	-6.25	0	0	0	0	0	9.13223	1	1	0	0	-3.36088	3	0.901407	3	0	0	7	3	6.81818	9.85538	0	0	9
398	22.9667	7.11365	1	0	10.3983	63.32	0.0211833	1	10.7182	0	0	0	0	63.32	1	14.8963	0	0	1	0	100.725	3	0	3.39833	1.76003	-3.75	0	0	0	0	0	8.5475	0	0	0	0	-0.906801	2	0.790405	2	0	0	0	1	10	3.69444	0	0	3
399	0	37.7257	0	0	11.3566	110.45	11.7229	0	69.4751	0	0	1	1	110.45	6	51.5893	0	0	1	0	141.047	8	1	6.15806	8.85085	-3.75	0	0	0	0	0	0	1	1	0	0	-4.70881	6	1.21696	6	0	0	16	2	9.83607	8.4043	0	0	7
400	33.8711	30.1068	0	0	12.2748	104.89	2.46715	1	63.51	0	0	1	1	104.89	4	48.5177	0	1	1	0	169.691	8	1	6.23032	11.0684	-4.5	0	0	1	0	0	10.3935	1	1	0	0	-3.52193	5	0.971188	6	0	1	10	3	9.25926	18.0731	0	1	8
401	35.2313	30.4952	0	0	12.2966	104.89	1.8384	1	62.9914	0	1	1	1	104.89	4	48.6571	0	1	1	0	166.103	9	1	6.20778	12.2665	-4.5	0	0	0	1	0	10.4301	1	1	0	0	-4.13342	5	0.983715	5	0	1	10	3	9.25926	17.9355	0	1	8
402	70.3975	30.962	0	0	12.3483	70.67	4.89207	1	57.8022	3	0	1	1	79.05	2	31.4558	0	1	1	0	92.8529	7	2	5.3483	10.6867	-3	0	0	0	0	0	0	1	1	0	0	-4.14041	3	1.03207	2	0	0	7	3	4.91803	11.3563	0	0	6
407	0	32.0027	0	0	12.7041	53.09	12.7603	0	60.3596	2	0	1	1	53.09	2	33.2485	0	1	0	0	70.6627	7	2	5.78713	9.92824	-6	0	0	0	0	0	0	1	1	0	0	-5.19103	3	0.969779	4	0	1	8	3	4.7619	10.5758	1	0	6
420	50.3979	18.082	0	0	11.4478	69.26	7.94744	1	46.325	0	0	1	1	69.26	4	25.1721	1	1	0	0	86.6177	6	1	5.0224	8.36346	3.5	0	0	0	0	0	0	1	1	0	0	-3.91269	2	0.695462	2	0	1	4	4	4.7619	10.8523	0	0	5
423	0	15.7714	0	0	11.087	75.27	0.89745	0	27.2582	0	0	0	0	75.27	4	28.3091	0	1	0	0	111.456	5	0	5.03377	5.65825	-5.25	0	2	0	1	0	0	1	0	0	0	-2.18326	3	0.927729	3	1	0	5	2	9.09091	6.35294	0	0	5
425	28.7057	24.9062	0	0	0	40.46	14.0737	1	35.7706	2	0	0	0	40.46	0	28.3257	0	0	0	0	100.327	3	1	6.08876	7.35063	-6.25	0	0	0	0	0	9.66232	0	1	0	0	-4.47356	2	1.18601	2	0	0	4	0	4.54545	14.1905	0	1	3
429	34.4672	16.2855	0	0	11.9828	64.43	5.39254	1	38.6636	0	0	1	0	64.43	2	36.8032	1	1	1	0	96.1597	7	1	5.46774	6.82621	-2.25	0	0	0	0	0	0	1	1	0	1	-3.13059	3	0.740249	4	1	0	9	3	8.33333	11.6364	1	0	6
433	25.9525	22.0177	0	0	12.145	81.42	4.63782	1	48.3396	0	0	1	1	81.42	4	38.6457	0	1	1	0	123.883	6	1	6.01045	9.72477	-1.5	0	0	1	0	0	10.8331	1	1	0	0	-3.5408	4	0.846834	5	0	1	8	2	9.52381	17.8462	0	0	6
441	128.743	14.1057	0	0	10.954	90.02	6.58918	2	38.2373	0	0	1	1	90.02	2	22.0572	1	1	1	0	81.3893	7	1	3.95398	6.72515	2.5	0	0	0	0	5.76539	0	1	1	0	0	-4.07866	3	0.613291	2	1	0	5	4	7.69231	8.58103	0	0	5
444	0	37.8477	0	0	13.7838	43.78	20.6928	0	72.274	0	0	1	1	43.78	1	29.3134	0	1	0	0	74.0769	5	3	6.78384	10.4681	-1.75	0	0	1	0	0	11.2172	1	1	0	0	-5.89728	2	1.08136	2	0	0	3	2	2.85714	9.14286	0	0	4
450	0	15.2732	0	0	0	41.49	5.61857	0	26.9349	2	0	1	0	41.49	1	14.8533	0	0	0	0	71.694	3	1	3.77251	3.67611	-2.75	0	0	0	0	0	9.77251	1	0	0	0	-2.53639	2	0.848511	3	0	0	5	1	4.87805	6.52941	0	0	3
455	77.7941	25.9869	0	0	12.1164	53.6	7.05061	1	49.3908	2	0	1	1	53.6	1	20.7044	0	1	0	0	75.2906	5	2	5.11636	8.72318	-3.5	0	0	0	0	0	0	1	1	0	0	-3.90927	2	0.928102	3	0	0	6	3	3.50877	10.4894	0	0	5
457	49.2633	24.7711	0	0	0	70.38	17.0916	1	53.2079	1	0	1	0	70.38	0	19.7033	1	0	0	0	89.5024	8	1	2.29453	10.3248	-1.75	0	0	0	0	0	0	1	0	0	0	-5.24486	0	0.854177	0	4	0	0	7	0	13.3079	0	0	6
458	89.3858	16.706	0	0	0	101.88	5.91327	2	32.7087	2	0	1	1	101.88	1	20.3769	0	0	0	0	143.948	7	0	3.25714	6.71135	-5.25	0	0	0	0	0	9.25714	1	0	0	0	-2.49912	1	0.795523	1	6	0	2	6	2.5641	9.23333	0	0	6
461	0	12.4848	1	0	10.7624	37.3	10.4357	0	21.8547	0	0	0	0	37.3	1	14.0131	0	0	1	0	67.8283	2	1	3.76243	3.16072	-0.5	0	0	0	0	0	8.85016	0	1	0	0	-3.33356	2	0.832322	2	0	0	2	0	6.06061	5.21905	0	0	2
464	0	18.1901	0	0	12.1286	67.35	6.3952	0	37.5582	0	0	1	1	67.35	1	19.7734	0	1	1	0	90.8509	6	1	5.12858	6.20327	-2	0	0	0	1	0	0	1	1	0	0	-3.46617	2	0.757922	3	2	0	4	4	4.34783	8.82609	0	0	6
467	0	11.0638	0	0	10.5408	104.64	0.0401735	0	25.286	0	0	1	0	104.64	2	22.4776	0	1	1	0	138.084	6	1	3.54076	3.31613	-1.5	0	0	0	2	0	0	1	0	0	0	-1.4165	4	0.650811	6	0	0	6	2	12.9032	5.38235	0	0	6
484	0	10.3997	0	0	10.7396	75.27	0.0241481	0	19.2587	0	0	0	0	75.27	3	25.1048	0	1	0	0	111.456	5	0	4.40639	3.9023	-3.75	0	2	0	1	0	0	0	0	0	0	-1.13238	3	0.799979	3	1	0	2	2	12	4.84615	0	0	5
488	0	2.13662	0	0	9.59028	26.3	0.0177128	0	4.4325	0	0	0	0	26.3	1	6.40278	0	0	1	0	36.1448	2	0	2.59028	0	-1.25	0	0	0	0	0	0	0	0	0	0	-0.475687	2	0.427323	3	0	0	0	0	18.1818	1.8	0	0	2
489	48.6836	31.8467	0	0	13.1613	28.48	13.4949	1	52.5786	0	0	1	1	28.48	2	17.795	2	1	0	0	31.3936	4	1	6.1613	9.30465	-8.5	0	0	0	0	0	0	1	1	0	0	-4.94868	1	1.09816	1	0	0	3	3	1.6129	12.367	1	0	3
495	0	15.1442	0	0	11.9177	56.33	6.97464	0	36.8621	0	0	1	1	56.33	2	19.2477	0	1	0	0	88.9633	4	2	4.91768	6.81638	1.75	0	0	0	0	0	10.1519	1	1	0	0	-3.40598	2	0.688372	2	0	1	4	2	5	9.66234	0	1	4
496	57.0802	25.256	0	0	12.7079	76.82	3.18064	1	42.8317	1	0	1	1	76.82	1	29.0991	0	1	0	0	101.177	7	1	5.70785	7.49595	-8	0	0	0	0	0	0	1	1	0	0	-2.89435	3	1.01024	5	0	0	4	3	5.88235	9.53667	0	0	6
504	71.7868	28.3352	0	0	12.7439	64.43	12.2413	2	50.2589	1	0	1	0	64.43	2	32.1705	1	1	1	0	81.1996	7	1	6.16148	10.0815	-4.5	0	0	0	0	0	0	1	1	0	0	-4.92408	3	1.08981	4	1	0	11	3	6.52174	14.0246	1	0	5
508	223.214	102.997	0	0	13.002	154.1	7.26173	3	175.024	3	0	1	1	154.1	4	94.6992	2	0	1	0	214.174	13	2	8.32199	23.3087	-19	0	0	2	0	0	11.9761	1	1	0	0	-6.5846	9	1.74571	13	0	3	47	4	7.69231	22.4278	0	0	12
510	0	1.07735	0	0	0	0	1.48566	0	1.91421	0	0	0	0	0	1	0.722222	0	0	0	0	0	0	0	0.361111	0	0	0	0	0	0	0	0	0	0	0	0	-1.17651	0	0.359117	0	0	0	0	0	0	1.33333	0	0	0
512	52.1951	19.9911	0	0	12.3624	49.77	4.87148	1	33.678	3	0	1	0	49.77	1	23.3652	0	0	1	0	81.9525	4	1	5.36239	6.61203	-5.75	0	0	0	0	0	9.52867	1	1	0	0	-2.75647	3	0.951958	4	0	0	7	1	6.81818	7.85238	0	0	4
517	0	14.4365	0	0	11.9402	34.03	4.36055	0	21.1802	0	0	0	0	34.03	3	13.0254	0	1	0	0	46.28	4	0	4.94019	5.45321	-5.5	0	0	0	0	0	0	1	0	0	0	-2.46343	1	0.962433	1	0	0	0	2	3.57143	10.1333	0	0	3
518	0	14.7713	0	0	11.7289	34.03	3.3131	0	21.2171	0	0	0	0	34.03	3	13.2834	0	1	0	0	46.28	4	0	4.7289	5.65778	-5.5	0	0	0	0	0	0	1	0	0	0	-2.51897	1	0.984751	1	0	0	0	2	3.57143	10.1905	0	0	3
522	161.001	27.5061	0	0	0	54.69	16.268	2	58.6841	0	0	1	1	54.69	0	15.9269	2	0	0	0	65.706	6	2	2.5534	10.3898	-0.5	0	0	0	0	0	0	1	1	0	0	-5.54777	1	0.859565	2	2	0	2	5	1.63934	12.3266	0	0	5
524	26.9857	5.99266	0	1	0	77.29	0.0584713	1	11.7572	0	1	0	0	105.53	1	7.88623	1	0	0	0	99.3654	5	0	1.12813	2.9407	-0.5	0	0	0	1	0	0	1	0	0	0	-1.19439	0	0.599266	0	4	0	0	4	0	4.2	0	0	4
530	0	24.3406	0	0	12.2228	48.99	17.4509	0	45.5913	0	0	1	1	48.99	2	21.2396	0	1	0	0	63.0655	5	2	5.2228	8.59946	-1.75	0	0	0	0	0	0	1	1	0	0	-5.0761	1	0.901502	1	1	0	1	3	1.96078	11.2137	0	0	4
537	0	4.00537	0	0	10.0437	17.07	1.13295	0	5.69869	0	0	0	0	17.07	1	6.09028	0	0	0	0	25.1449	1	0	3.04375	0.57735	-1.25	0	0	0	0	0	0	0	0	0	0	-1.1387	1	0.667561	1	0	0	0	0	6.25	2.13333	0	0	1
544	0	0	0	0	0	0	1.24323	0	0	0	0	0	0	0	0	0	0	0	0	0	0	0	0	0	0	0	0	0	0	0	0	0	0	0	0	0	-0.873726	0	0	0	0	0	0	0	0	0	0	0	0
545	35.0544	13.246	0	0	0	52.05	11.2173	1	31.404	1	0	1	0	52.05	1	12.3133	1	0	0	0	62.2279	3	2	2.22685	6.40635	3	0	0	0	0	5.38718	0	1	0	0	0	-4.05728	1	0.662298	1	0	0	2	2	2.77778	9.24211	0	0	3
553	0	13.9358	0	0	12.4035	63.57	4.68567	0	32.2234	1	0	0	0	63.57	1	17.7998	0	1	0	0	79.8511	5	0	5.40348	6.78895	0.5	0	0	0	0	0	0	1	0	0	0	-3.42884	1	0.696791	1	2	0	3	4	2.94118	12.2789	0	0	5
555	0	0.996285	0	0	0	12.53	0.318602	0	1.5	0	0	0	0	12.53	0	2	0	0	0	0	10.9999	1	0	1	0	-2	0	0	0	0	0	0	0	0	0	0	-0.161343	1	0.332095	2	0	0	0	0	14.2857	2	0	0	1
556	0	18.6011	0	0	11.0389	75.27	4.93514	0	28.7941	0	0	1	1	75.27	3	27.9388	0	1	0	0	111.456	5	0	4.89525	4.68263	-6.25	0	2	0	1	0	0	1	1	0	0	-2.58203	3	1.03339	3	1	0	4	2	7.5	5.93464	0	0	5
558	0	0.16	0	0	0	47.58	5.16103	0	1	0	0	0	0	47.58	0	0	0	0	0	0	61.8737	2	0	0	0	1.5	0	0	0	0	0	0	0	0	0	0	0.23403	0	0.08	0	0	0	0	2	0	1	0	0	2
565	0	1.91981	0	0	0	0	2.79546	0	2.95465	0	0	0	0	0	1	3.04938	0	0	0	0	0	2	0	0.762346	0	-1	0	0	0	0	0	0	0	0	0	0	-1.71457	0	0.479953	0	0	0	0	0	0	1.66667	0	0	0
570	56.7506	24.3001	0	0	12.6063	55.43	12.5899	1	53.1606	1	0	1	1	55.43	3	19.6851	1	1	0	0	64.597	6	1	5.60632	9.7396	-0.5	0	0	0	0	0	0	1	1	0	0	-4.62714	1	0.837935	1	0	0	2	5	1.92308	11.8621	0	0	5
573	0	5.53159	0	0	0	20.23	1.46265	0	6.37132	0	0	0	0	20.23	0	5.65278	0	0	0	0	42.6833	1	0	2.82639	0	-2.75	0	0	1	0	0	8.82639	0	0	0	0	-1.2866	1	0.921931	1	0	0	0	0	5.55556	1.86667	0	0	1
581	0	15.2548	0	0	10.9537	75.27	0.572539	0	25.0136	0	0	1	0	75.27	3	27.1029	0	1	0	0	111.456	5	0	4.76954	4.32907	-5.25	0	2	0	1	0	0	1	1	0	0	-1.88324	3	0.953426	3	1	0	4	2	8.82353	5.40833	0	0	5
591	0	15.5384	0	0	11.3496	49.41	2.0146	0	24.7851	0	0	0	0	49.41	3	18.9895	0	1	0	0	71.4249	4	0	4.97183	4.48643	-6.25	0	1	0	1	0	0	1	0	0	0	-2.38036	2	0.97115	2	1	0	3	2	5.88235	6.35	0	0	4
593	65.06	23.7147	0	0	0	37.39	13.2068	1	43.0411	0	1	1	0	65.63	0	12.6106	1	0	0	0	48.9205	5	2	2.45719	8.74359	-2.25	0	0	0	0	0	0	1	1	0	0	-4.93866	1	0.878324	2	1	0	2	3	1.85185	11.3219	0	0	4
595	81.0941	27.4002	0	0	0	51.11	10.2074	1	52.5553	2	0	1	1	51.11	0	14.9013	1	0	0	0	63.6844	5	2	2.13773	9.10842	-1.75	0	0	0	0	0	0	1	1	0	0	-4.5658	1	0.944835	2	0	0	3	4	1.69492	10.5961	0	0	4
596	20.2859	25.1749	0	0	12.6529	59	1.90729	1	42.4891	2	0	0	0	59	1	32.886	0	0	0	0	92.9524	5	1	5.7489	9.91644	-7.25	0	0	1	0	0	11.7489	1	0	0	0	-2.74741	4	1.09456	6	0	1	9	1	9.09091	15.5573	0	0	5
598	0	31.0188	0	0	11.9311	54.9	7.96673	0	60.3125	0	0	1	1	54.9	1	24.3512	0	1	0	0	70.1789	6	2	4.93111	10.3227	-2.75	0	0	0	0	0	0	1	1	0	0	-4.93916	3	0.939963	5	0	0	5	3	4.6875	13.5833	0	0	6
602	0	4.42985	0	0	9.98042	26.3	0.991242	0	7.02592	0	0	0	0	26.3	1	8.065	0	0	1	0	36.1448	2	0	2.98042	0.612372	-2.25	0	0	0	0	0	0	0	0	0	0	-1.0259	2	0.632835	3	0	0	0	0	11.7647	2.47619	0	0	2
605	0	18.4595	0	0	12.1386	54.46	3.64495	0	37.5582	0	0	1	1	54.46	1	17.9524	0	1	1	0	74.0654	5	1	5.13858	6.20327	-1.5	0	0	0	1	0	0	1	1	0	0	-3.47742	2	0.769145	3	0	0	4	3	4.25532	8.82609	0	0	5
607	0	14.9994	0	0	11.8373	58.36	5.05524	0	27.6259	0	0	1	0	58.36	1	18.0202	0	1	0	0	79.1772	5	1	4.83726	4.00185	-3	0	0	0	0	0	0	1	0	0	0	-2.59781	1	0.833299	1	0	0	2	3	2.63158	5.96732	0	0	4
608	100.915	28.0217	0	0	12.778	68.18	15.0791	1	64.5239	0	0	1	1	68.18	1	26.1724	1	1	0	0	88.8293	7	3	5.77805	9.84219	3.25	0	0	0	0	0	0	1	1	0	0	-5.62457	2	0.824169	3	0	0	5	4	3.27869	11.2496	0	0	5
611	87.5162	25.1083	0	0	11.5606	39.68	8.67731	1	44.4177	0	0	1	0	39.68	1	40.9397	0	1	0	0	96.1837	8	0	4.82725	6.34812	-9.75	0	0	0	0	0	0	1	1	0	1	-3.65083	1	0.965702	1	1	0	1	4	1.96078	9.19692	0	0	8
614	0	17.634	0	0	0	58.04	12.6029	0	41.0597	0	0	1	0	58.04	0	12.9349	0	0	0	0	73.1457	6	1	1.50222	7.84538	2	0	0	0	0	0	0	1	0	0	0	-4.30291	0	0.705359	0	4	0	0	6	0	9.3	0	0	6
615	59.5622	20.2173	0	0	11.7783	73.56	11.4037	1	51.5583	0	0	1	1	81.94	2	29.0646	1	0	1	0	88.6389	7	2	4.77832	9.2656	6.25	0	0	0	0	0	0	1	1	0	0	-4.86335	3	0.722047	2	1	0	3	3	6.38298	11.0079	0	0	5
621	0	4.59003	0	0	0	20.23	1.46265	0	5.31294	0	0	0	0	20.23	0	4.63611	0	0	0	0	42.6833	1	0	2.19736	0.5	-2.75	0	0	0	0	0	8.19736	0	0	0	0	-1.16329	1	0.765004	1	0	0	0	0	5.55556	2.33333	0	0	1
626	0	0	0	0	0	0	0	0	0	0	0	0	0	0	0	0	0	0	0	0	0	1	0	0	0	0	0	0	0	0	0	0	0	0	0	0	0	0	0	0	0	0	0	0	0	0	0	0	0
632	48.8418	20.3229	0	0	12.4239	62.3	2.01492	1	35.3422	5	0	1	1	62.3	1	27.7	0	0	1	0	92.9524	5	1	5.42388	7.46108	-7.25	0	0	0	0	0	9.55779	1	1	0	0	-2.21124	4	0.923769	6	0	1	8	1	9.30233	8.59307	0	0	5
635	0	20.3111	0	0	11.0719	75.27	6.17566	0	30.6905	0	0	1	1	75.27	3	28.243	0	1	0	0	111.456	5	0	4.94157	4.8594	-6.75	0	2	0	1	0	0	1	1	0	0	-2.82296	3	1.069	3	1	0	4	2	6.97674	6.22222	0	0	5
637	45.7911	17.3421	0	0	11.3284	32.34	6.93661	1	28.4664	0	0	1	1	32.34	1	12.1219	0	1	0	0	46.28	3	1	4.32841	5.13589	-3.5	0	0	0	0	0	0	1	1	0	0	-2.99089	1	0.912743	1	0	0	1	2	2.32558	7.79532	0	0	3
641	0	18.3113	0	0	11.6422	89.6	5.96988	0	41.3689	1	0	1	1	89.6	2	24.2437	0	0	1	0	120.624	6	1	4.64224	7.35057	1	0	0	0	0	0	0	1	1	0	0	-3.53301	2	0.762971	3	1	0	2	4	4.54545	9.7971	0	0	6
643	0	7.00276	0	0	0	0	7.74756	0	9.73929	0	0	0	0	0	0	25.0065	0	0	0	0	59.8405	5	0	3.3941	0	-4.5	0	0	0	0	0	0	0	0	0	0	-2.92083	0	0.875344	0	0	0	0	0	0	2.35714	0	0	4
646	81.4668	19.5978	0	0	13.0617	34.36	7.25047	2	36.5962	0	0	1	0	34.36	3	15.9647	2	0	0	0	41.9305	3	1	6.06174	7.81708	-1.5	0	0	0	0	0	0	1	0	0	0	-4.0842	1	0.89081	1	0	0	3	2	2.38095	11.7749	0	0	2
649	0	23.2936	0	0	13.4668	41.99	23.9624	0	54.4881	1	0	1	0	41.99	1	18.7052	0	1	0	0	59.9412	3	3	6.46677	9.33225	6.25	0	0	0	0	0	0	1	0	0	0	-6.09314	1	0.803226	1	0	0	5	2	1.88679	11.0788	0	0	3
655	63.3919	18.7553	0	0	0	55.63	22.1545	1	46.252	0	0	1	0	55.63	0	12.368	0	0	0	0	68.3673	5	2	1.56729	9.31466	4.25	0	0	0	0	0	0	1	0	0	0	-5.40314	0	0.694641	0	3	0	0	5	0	13.6524	0	0	4
656	0	9.00248	0	0	0	9.23	4.44924	0	18.564	1	0	0	0	9.23	0	46.8597	0	0	0	0	115.721	8	0	3.39137	0	-7.75	0	0	0	0	0	0	0	0	0	0	-2.71951	1	0.750207	2	0	0	0	0	6.66667	2.84848	0	0	8
659	66.4896	19.7747	0	0	0	21.7	8.00516	2	31.1719	0	0	1	1	21.7	0	10.368	0	0	0	0	25.1241	3	1	1.9631	6.47528	-5.75	0	0	0	0	0	0	1	1	0	0	-3.47661	2	0.988734	4	0	0	3	1	4.44444	10.2316	0	0	3
674	0	21.5315	0	0	11.5647	114.1	1.54059	0	50.4426	0	0	1	1	114.1	2	26.8617	0	1	1	0	152.759	9	1	4.56474	8.04354	-1.25	1	0	0	1	0	0	1	1	0	0	-3.35041	3	0.768983	5	2	0	4	6	5.76923	10.3413	0	0	9
677	44.0041	17.8465	0	0	0	39.08	5.89926	1	37.2603	1	0	1	0	39.08	0	13.2037	1	0	0	0	45.7962	4	2	2.4452	7.33819	-1.25	0	0	0	0	0	0	1	1	0	0	-3.87853	1	0.775936	2	1	0	4	3	2.27273	10.5455	0	0	3
683	0	15.2778	0	0	0	65.28	2.47869	0	27.9348	1	0	1	0	65.28	0	18.7795	0	0	0	0	102.753	4	1	3.76701	3.5243	-1	0	0	0	0	0	9.76701	1	0	0	0	-2.22436	2	0.848765	3	0	0	6	2	5.26316	6.31373	0	0	4
684	36.0911	9.27506	0	1	0	36.42	7.07449	1	18.5908	0	0	0	0	36.42	1	12.078	0	0	0	0	52.807	5	1	1.84225	4.10697	-1.5	0	0	0	1	0	0	1	0	0	0	-3.25326	0	0.662504	0	3	0	0	3	0	6.24176	0	0	3
686	0	21.0224	0	0	0	50.72	3.96439	0	33.2018	2	0	1	1	50.72	0	17.9522	0	0	0	0	82.6939	4	1	3.80308	4.24594	-6.75	0	0	0	0	0	9.80308	1	1	0	0	-2.51494	3	0.955562	5	0	0	6	1	5.88235	7.34199	0	0	4
688	21.2151	14.5557	0	0	0	21.26	13.5007	1	29.3487	0	0	0	0	21.26	0	12.0571	0	0	0	0	29.0106	3	2	2.60738	7.08612	0.25	0	0	0	0	0	0	1	0	0	0	-4.45825	1	0.766091	2	0	0	0	1	3.0303	14.4971	0	0	2
693	0	4.80511	0	0	10.0319	26.3	0.991242	0	7.47658	1	0	0	0	26.3	1	8.28611	0	0	1	0	36.1448	2	0	3.03194	0.942809	-2.25	0	0	0	0	0	0	0	0	0	0	-1.09171	2	0.686445	3	0	0	0	0	11.7647	2.28571	0	0	2
699	0	29.1067	1	0	11.4715	100.59	4.00152	0	56.6715	3	0	1	1	100.59	3	62.0234	0	0	1	0	180.05	9	1	7.64531	8.64559	-7	0	0	0	0	0	9.34119	1	1	0	0	-3.46201	3	1.03953	3	0	0	10	4	6	10.1429	0	0	9
708	0	6.04835	0	0	10.126	26.3	1.88602	0	8.87963	0	0	0	0	26.3	1	8.59231	0	0	1	0	36.1448	2	0	3.12597	0.666667	-2.75	0	0	0	0	0	0	0	0	0	0	-1.32823	2	0.756044	3	0	0	0	0	10	2.64286	0	0	2
711	91.7066	28.4179	0	0	12.2828	43.86	12.7245	1	55.4178	0	0	1	1	43.86	2	34.2236	0	1	0	0	74.6229	6	2	6.05111	8.93934	-4	0	0	0	0	0	0	1	1	0	1	-4.47114	2	0.947262	2	1	0	5	3	3.44828	10.0897	0	0	6
714	0	21.3759	0	0	12.8876	33.2	20.637	0	45.7291	1	0	1	0	33.2	1	19.9436	0	1	0	0	45.0548	4	2	5.8876	7.63302	2.25	0	0	0	0	0	0	1	0	0	0	-5.54919	1	0.855034	1	0	0	4	2	2.17391	10.0667	1	0	3
716	0	37.7459	0	0	0	24.5	25.2477	0	67.4502	2	0	1	1	24.5	0	15.9834	0	0	0	0	32.135	3	3	2.24443	10.9674	-2.25	0	0	0	0	0	0	1	1	0	0	-6.25732	1	1.11017	2	0	0	4	2	1.38889	10.9929	0	0	3
723	0	15.2033	0	0	0	28.6	6.62919	0	33.2226	0	0	1	1	28.6	0	8.22413	0	0	0	0	34.034	4	1	1.70514	5.00257	-0.5	0	0	0	0	0	0	1	1	0	0	-3.21233	1	0.723968	2	1	0	0	3	2.27273	6.8381	0	0	4
725	0	9.36685	0	0	0	0	20.431	0	9.36685	0	0	0	0	0	0	1.05484	0	0	0	0	0	0	0	0.263711	1.03033	-4	0	0	0	0	0	0	0	0	0	0	-3.17425	0	1.04076	0	0	0	0	0	0	3.33333	0	0	0
727	55.5008	19.2777	0	0	0	39.72	10.8173	1	38.6252	0	0	1	1	39.72	0	24.5773	0	0	1	0	65.9705	5	2	5.17042	7.2894	-2.25	0	0	0	0	0	0	1	1	0	1	-4.10144	3	0.803237	6	0	1	4	1	6.81818	10.692	0	0	5
733	0	4.2305	0	0	0	0	4.10565	0	3.23205	1	0	0	0	0	0	1.375	0	0	0	0	0	1	0	0.520833	0	-1.5	0	0	0	0	0	0	0	0	0	0	-2.07205	0	1.05763	0	0	0	0	0	0	1.5	0	0	0
734	0	31.4004	0	0	12.9183	69.02	11.9081	0	59.7722	1	0	1	1	69.02	1	23.7714	0	1	0	0	94.1249	5	2	5.91828	10.3391	-0.25	0	0	0	0	0	0	1	0	0	0	-5.39792	1	0.951526	1	0	0	2	4	1.5873	13.3068	0	0	5
736	0	9.9249	0	0	0	3.24	10.8848	0	18.9251	1	0	0	0	3.24	0	4.74103	0	0	0	0	3.12431	1	1	1.26895	2.92079	0.25	0	0	0	0	0	0	1	0	0	0	-3.08964	0	0.708922	0	0	0	0	1	0	5.15385	0	0	1
740	0	28.1788	0	0	0	70.95	8.20876	0	51.6578	4	0	1	1	70.95	0	49.1336	0	0	0	0	155.297	7	2	5.28025	8.0862	-5.5	0	0	0	0	0	10.4235	1	1	0	1	-4.07953	4	0.971684	6	0	0	8	1	7.40741	12.0887	0	0	7
741	39.488	15.9556	0	1	0	36.42	13.0567	1	21.2061	0	0	0	0	36.42	1	9.68254	0	0	0	0	52.807	6	1	1.27667	7.51298	-1.5	0	0	0	1	0	0	1	0	0	0	-4.91683	0	1.06371	0	3	0	0	3	0	6.31429	0	0	3
745	51.7597	20.1773	0	0	12.1885	55.84	5.82533	1	37.2369	3	0	1	0	55.84	2	28.7519	0	0	1	0	75.4139	5	1	5.29671	6.83828	-5.25	0	0	0	0	0	0	1	1	0	0	-2.96041	4	0.917151	6	0	0	4	1	9.30233	8.42857	0	0	5
748	0	25.9722	0	0	12.2949	23.55	14.4201	0	38.659	0	0	1	1	23.55	1	13.1874	0	1	0	0	31.3936	3	1	5.29485	6.71391	-6.75	0	0	0	0	0	0	1	1	0	0	-4.26185	1	1.08217	1	0	0	1	2	1.78571	10.3841	0	0	3
753	0	12.4256	0	0	0	0	19.6378	0	12.4256	0	0	0	0	0	0	2.26778	0	0	0	0	0	0	0	0.377963	1.96861	-5	0	0	0	0	0	0	0	0	0	0	-3.55964	0	1.24256	0	0	0	0	0	0	4.4	0	0	0
756	64.5404	27.3543	0	0	0	46.18	7.66715	1	48.024	2	1	1	1	74.42	0	15.533	1	0	0	0	63.8069	5	2	2.21343	9.8258	-3.5	0	0	0	0	0	0	1	1	0	0	-4.7278	1	0.976939	2	0	0	3	3	1.81818	11.4101	0	0	4
759	0	25.5097	0	0	0	45.15	11.2257	0	51.3641	2	0	1	0	45.15	0	73.2048	0	0	0	0	167.24	9	1	5.23743	6.2787	-6.75	0	0	0	0	0	10.5883	1	0	0	1	-5.07224	1	0.981141	1	0	0	2	2	2.38095	9.92923	0	0	9
762	0	15.6535	0	0	0	25.36	4.1394	0	32.3982	0	0	1	0	25.36	0	9.51905	0	0	0	0	30.9097	3	1	2.70838	5.1569	-0.25	0	0	0	0	0	0	1	0	0	0	-3.11899	1	0.782677	2	0	0	0	2	2.38095	6.38421	0	0	3
770	0	24.0329	0	0	0	48.83	5.56805	0	46.4212	0	1	1	1	77.07	1	17.0605	0	0	0	0	76.7174	6	2	2.79486	9.11144	-3.25	0	0	0	0	0	8.79486	1	1	0	0	-3.86979	2	0.890108	3	1	0	0	3	3.84615	13.3191	0	0	5
777	72.0141	27.4714	0	0	0	48.83	10.3836	1	50.4702	2	1	1	1	77.07	0	27.9745	1	0	0	0	91.6775	7	2	4.92708	9.11335	-4	0	0	0	0	0	10.2916	1	1	0	1	-4.60475	2	0.94729	3	1	0	5	3	3.63636	10.5616	0	0	6
781	0	19.2702	0	0	0	56.84	9.0858	0	36.5484	0	0	1	1	56.84	1	38.1323	0	0	0	0	119.396	7	1	4.57384	3.86284	-5.75	0	0	0	0	0	0	1	1	0	1	-3.24118	2	0.875919	3	0	0	3	2	4.65116	6.25108	0	0	7
784	230.116	39.317	0	0	13.2203	47.1	14.1426	2	69.5152	2	0	1	1	47.1	2	27.7468	0	1	0	0	62.7871	6	2	6.22629	11.0253	-8.5	0	0	0	1	0	0	1	1	0	0	-5.54952	2	1.09214	2	1	0	6	4	2.63158	11.1159	1	0	6
786	0	6.47372	0	0	0	26.02	5.15819	0	12.7368	1	0	0	0	26.02	0	12.1584	0	0	0	0	47.8573	2	1	4.43639	2.35547	-0.5	0	0	0	0	0	0	1	0	0	0	-2.3008	0	0.58852	0	0	0	0	1	0	5.09091	0	0	2
787	0	20.3225	0	0	0	32.7	9.24443	0	38.8069	0	0	1	0	32.7	0	18.0608	0	0	0	0	56.8075	3	2	5.57197	7.82747	-1.5	0	0	1	0	0	11.572	1	0	0	0	-4.19771	2	0.923748	3	0	0	3	1	4.65116	15.381	0	0	3
790	0	17.0819	0	0	11.9087	20.31	11.9293	0	28.242	0	0	1	0	20.31	1	20.8214	0	0	0	0	43.2294	3	1	4.90874	4.2852	-3.75	0	0	0	0	0	0	1	1	0	1	-3.68423	1	0.899046	1	0	0	2	1	2.43902	7.21637	0	0	3
793	112.36	25.9165	0	0	0	23.47	15.675	2	37.8937	0	0	1	0	23.47	1	15.0627	0	0	0	0	45.8077	2	1	5.77454	7.49767	-7	0	0	1	0	0	11.7745	1	0	0	0	-4.2006	1	1.1268	1	0	0	2	1	1.92308	7.94071	0	0	2
799	0	14.8484	0	0	11.6518	32.78	4.48756	0	28.807	1	0	1	0	32.78	1	13.5113	0	1	1	0	42.3934	4	1	4.65179	3.72898	-3.25	1	0	0	1	0	0	1	0	0	0	-2.91507	2	0.824909	3	0	0	4	2	5	5.9085	0	0	4
819	0	15.9182	0	0	0	6.48	11.3967	0	31.7876	1	0	1	0	6.48	0	6.34464	0	0	0	0	6.24863	2	2	0.612269	7.04636	-0.5	0	0	0	0	0	0	1	0	0	0	-4.22436	0	0.795908	0	0	0	0	2	0	15.3316	0	0	2
824	0	15.8058	0	0	0	12.47	12.45	0	33.8368	0	0	1	0	12.47	1	8.20311	0	0	0	0	14.1242	2	2	2.48134	6.25246	1.25	0	0	0	0	0	0	1	0	0	0	-4.28861	1	0.752657	2	0	0	1	1	2.38095	12.2905	0	0	2
830	22.7902	16.3173	0	0	0	12.47	15.303	1	32.2008	0	0	0	0	12.47	0	11.5468	0	0	0	0	14.1242	3	2	2.65188	7.36519	-0.5	0	0	0	0	0	0	1	0	0	0	-4.7883	1	0.815863	2	0	0	1	1	2.77778	14.5421	0	0	2
831	0	20.0767	0	0	0	32.7	10.9459	0	38.6219	0	0	1	0	32.7	0	21.1328	0	0	0	0	56.8075	4	2	5.52889	7.92686	-1.75	0	0	1	0	0	11.5289	1	0	0	0	-4.5032	2	0.912579	3	0	0	2	1	5	15.316	0	0	3
834	0	11.3224	0	0	0	0	23.2657	0	11.3224	0	0	0	0	0	0	1.75414	0	0	0	0	0	0	0	0.305378	1.15614	-4.5	0	0	0	0	0	0	0	0	0	0	-3.44377	0	1.13224	0	0	0	0	0	0	3.51111	0	0	0
835	0	15.4078	0	0	0	3.24	21.9324	0	33.8368	0	0	1	0	3.24	2	5.18652	0	0	0	0	3.12431	1	2	0.37963	6.25246	2.75	0	0	0	0	0	0	1	0	0	0	-4.76556	0	0.733706	0	0	0	0	1	0	12.2905	0	0	1
839	0	11.8782	0	0	0	12.03	6.26227	0	13.0811	1	0	0	0	12.03	0	2.32304	0	0	0	0	18.0108	1	0	0.812214	2.15854	-6	0	0	0	0	0	0	1	0	0	0	-2.49179	0	1.07984	0	0	0	0	1	0	4.8	0	0	1
840	81.0054	30.4049	0	0	0	42.32	21.4265	1	62.4562	1	0	1	1	42.32	0	23.0852	1	0	0	0	63.8806	6	3	5.38004	10.0357	-1.25	0	0	0	0	0	0	1	1	0	1	-5.86982	1	0.894263	2	3	0	1	4	1.53846	12.9251	0	0	5
842	0	17.997	0	0	0	36.26	8.35577	0	29.3953	0	0	1	0	36.26	1	11.949	0	0	0	0	45.1836	4	1	2.74793	5.00763	-1.5	0	0	0	0	0	0	1	0	0	0	-4.15103	1	0.899848	2	0	0	1	2	2.5641	7.50526	0	0	3
853	0	17.4378	0	0	0	6.48	11.7093	0	24.7573	1	0	1	0	6.48	0	5.59414	0	0	0	0	6.24863	3	1	0.600394	4.77602	-4	0	0	0	0	0	0	1	0	0	0	-4.36469	0	1.02575	0	0	0	0	2	0	6.63235	0	0	2
855	0	23.8003	0	0	12.1764	40.54	15.194	0	42.7646	0	0	1	1	40.54	1	31.6896	0	0	0	0	85.9127	5	2	5.17644	6.76181	-1.5	0	0	1	0	0	10.8882	1	1	0	1	-4.88267	2	0.952014	2	0	0	3	1	4.34783	8.51333	0	0	4
856	0	27.1346	0	0	0	11.41	12.6	0	51.5115	0	1	1	0	39.65	0	33.6242	0	0	0	0	54.2533	7	2	5.27138	8.69181	-5.5	0	0	0	0	0	0	1	0	0	1	-5.3813	0	0.969093	0	0	0	0	3	0	13.0556	0	0	6
858	0	28.8692	0	0	0	8.17	21.1452	0	51.5115	0	1	1	0	36.41	0	33.4639	0	0	0	0	51.129	6	2	5.27533	8.69181	-4.75	0	0	0	0	0	0	1	0	0	1	-6.24169	0	1.03104	0	0	0	0	2	0	13.0556	0	0	5
861	0	30.0474	0	0	0	31.64	8.7307	0	56.0746	0	1	1	0	59.88	0	39.4177	0	0	0	0	96.9366	8	2	5.31063	9.2911	-6.75	0	0	0	0	0	9.06718	1	1	0	1	-4.94055	1	1.00158	1	0	0	0	3	1.78571	13.3103	0	0	7
862	0	17.5293	0	0	0	12.03	26.5126	0	32.0879	1	0	1	0	12.03	0	11.3588	0	0	0	0	18.0108	3	2	2.06069	6.59608	0	0	0	0	0	0	0	1	0	0	0	-5.46887	0	0.876464	0	0	0	0	1	0	9.48421	0	0	1
864	134.71	50.6899	0	0	13.3851	160.83	0.0175762	2	96.2631	5	0	0	1	160.83	1	81.8535	0	0	1	0	252.194	13	2	6.38511	15.3475	-13.5	0	0	0	0	0	10.5666	0	1	0	0	-3.74701	13	1.2069	22	0	5	45	0	17.5676	17.3333	0	1	13
867	0	10.5186	0	0	0	121.38	6.23454	0	17.035	4	0	0	0	121.38	0	32.3538	0	0	0	0	256.1	6	0	2.95662	1.77999	-7	0	0	0	0	0	8.34332	0	0	0	0	1.44001	6	0.876548	6	0	3	2	0	23.0769	3.12121	0	0	6
870	56.9188	13.1614	0	1	0	88.89	0.673835	1	23.7825	0	1	1	0	114.19	1	11.2492	1	0	0	0	100.652	7	0	2.42713	4.20649	-2.75	0	0	0	1	0	0	1	0	0	0	-1.33991	0	0.774198	0	5	0	0	6	0	5.97794	0	0	5
872	265.177	103.204	0	0	11.9442	203.06	0.915226	2	136.95	11	0	0	1	203.06	2	107.556	0	0	1	0	358.244	14	0	6.5684	19.8272	-33.25	0	0	1	0	0	9.98754	0	1	0	0	-5.23726	14	1.87644	21	0	7	38	0	11.7647	18.8	0	0	14
874	38.6924	11.0626	0	0	11.4514	90.37	0.110128	1	21.0454	1	0	1	0	90.37	3	22.5661	0	1	0	0	131.635	6	0	4.45139	4.26242	-6	0	0	0	1	0	8.89611	1	0	0	0	-0.91329	3	0.737506	4	2	0	3	3	10.7143	6.27619	0	0	6
877	0	19.2315	1	0	11.2105	74.57	2.04554	0	40.8633	0	0	1	1	74.57	3	39.7151	0	0	1	0	132.193	7	1	6.49491	6.89663	-4	0	0	0	0	0	9.15058	1	1	0	0	-2.67935	3	0.836151	3	0	0	7	3	7.31707	9.58103	0	0	7
883	44.9924	13.9207	0	0	11.168	84.32	0.141648	1	26.4759	2	0	0	0	84.32	3	37.2283	0	1	0	0	140.068	7	0	5.36335	4.41781	-7.25	0	1	0	1	0	8.85893	1	0	0	0	-1.31165	4	0.818864	5	1	0	4	2	13.3333	6.44118	0	0	7
885	31.3195	9.72846	0	1	11.3751	119.05	0.00166597	1	22.8886	0	0	1	0	119.05	2	23.2129	0	1	0	0	163.307	8	0	4.37508	4.64326	-4.5	0	0	0	1	0	8.5587	1	0	0	0	-0.614926	3	0.608029	4	5	0	2	5	11.1111	7.8	0	0	7
889	69.9763	32.75	0	0	12.9566	84.39	8.14659	1	57.5151	1	0	1	1	84.39	3	40.9546	1	1	0	0	135.153	8	1	5.95655	10.2703	-8.5	0	0	0	0	5.32918	10.1569	1	1	0	1	-4.33753	3	1.05645	3	1	1	3	4	5.17241	12.9398	0	0	8
891	46.9571	18.1126	0	0	12.2613	37.61	9.15244	1	40.1021	0	0	1	0	37.61	1	15.02	1	1	0	0	45.0548	4	1	5.26127	6.4536	0.75	0	0	0	0	0	0	1	1	0	0	-4.17958	1	0.787503	1	1	0	4	3	2.27273	9.4585	0	0	3
896	0	27.5917	0	0	0	31.23	10.3875	0	46.0737	1	2	1	1	59.47	0	14.276	0	0	0	0	30.3345	5	2	5.01073	9.50969	-3.25	0	0	0	0	0	0	1	1	0	0	-5.13501	1	1.06122	0	0	0	2	2	1.92308	12.9354	0	0	3
898	0	5.05927	0	0	10.5245	49.33	1.12303	0	13.491	0	0	0	0	49.33	1	12.969	0	1	0	0	85.839	3	1	3.52447	2.23148	2	0	0	0	0	0	8.87809	0	0	0	0	-1.78776	2	0.459933	2	0	0	2	1	10	4.76364	0	1	3
905	0	26.0956	0	0	12.0309	42.43	12.274	0	49.0148	0	0	1	1	42.43	2	21.9398	0	1	1	0	56.0547	5	1	5.03095	8.93176	-2.25	0	0	0	1	0	0	1	1	0	0	-5.42154	2	0.966504	3	0	0	2	2	4	13.1624	0	0	4
918	0	13.984	0	0	10.4559	104.64	0.014741	0	22.7281	0	0	1	0	104.64	2	22.0507	0	1	1	0	138.084	6	0	3.45592	2.25283	-6	0	0	0	2	0	0	1	0	0	0	-1.05634	4	0.932263	6	0	0	2	2	12.1212	3.86667	0	0	6
919	0	1.82033	0	0	9.44444	17.07	0.0407549	0	3.23205	0	0	0	0	17.07	1	4.88889	0	0	0	0	25.1449	1	0	2.44444	0	-0.25	0	0	0	0	0	0	0	0	0	0	-0.530509	1	0.455084	1	0	0	0	0	10	1.5	0	0	1
925	48.5397	11.1517	0	0	11.5727	58.2	3.22118	1	30.3072	0	0	0	0	58.2	2	20.2719	0	1	0	0	86.3114	4	2	5.31311	6.46254	3	0	1	0	1	0	0	1	0	0	0	-2.9237	2	0.58693	2	1	0	6	2	6.45161	6.91228	0	0	4
932	24.7694	8.39796	0	0	11.4893	61.82	0.54211	1	20.9536	0	0	0	0	61.82	2	20.3089	1	1	0	0	73.324	6	0	4.67204	4.48184	-3.25	0	1	0	1	0	0	1	0	0	0	-1.51907	2	0.599854	2	3	0	1	4	8.33333	7.2967	0	0	5
934	0	40.053	0	0	11.6691	72.83	14.4146	0	56.4212	3	0	0	1	72.83	4	39.5694	0	0	1	0	114.973	5	0	5.54411	8.52895	-11.25	0	0	0	0	0	9.89344	0	1	0	0	-4.60624	5	1.38114	7	0	0	12	0	7.69231	10.9113	0	0	5
937	156.977	26.4245	0	0	12.2488	80.05	5.36207	2	42.1013	0	2	1	1	133.59	1	23.413	1	1	0	0	104.245	8	0	5.24881	8.23266	-5.75	0	0	0	0	5.79712	0	1	1	0	0	-3.80279	2	1.05698	3	1	0	1	4	4.08163	8.67667	0	0	6
943	0	15.8446	0	0	10.9618	75.27	0.572539	0	25.7301	0	0	0	0	75.27	3	27.2147	0	1	0	0	111.456	5	0	4.78788	4.18235	-5.25	0	2	0	1	0	0	1	0	0	0	-1.90262	3	0.990288	3	1	0	6	2	8.82353	5.3	0	0	5
947	0	1.63683	0	0	0	9.23	0.299758	0	4.09272	0	0	0	0	9.23	2	2.75	0	0	0	0	10.9999	1	0	0.861111	0.353553	-0.5	0	0	0	0	0	0	0	0	0	0	-0.750314	1	0.327366	2	0	0	0	0	9.09091	2	0	0	1
950	32.9454	13.3946	0	0	0	59.14	8.56227	1	27.1133	0	1	1	0	87.38	0	13.8554	1	0	0	0	92.3661	5	2	3.45174	7.08721	4	0	0	0	0	0	9.45174	1	1	0	0	-4.84188	1	0.744145	1	0	0	1	2	3.7037	8.62745	0	1	3
951	40.0719	17.5977	0	0	11.4738	32.34	6.93661	1	28.7996	0	0	1	1	32.34	1	12.154	0	1	0	0	46.28	3	1	4.47382	5.26819	-3.5	0	0	0	0	0	0	1	1	0	0	-2.99089	1	0.926192	1	0	0	1	2	2.32558	7.90058	0	0	3
953	0	6.25593	0	0	0	9.23	2.51893	0	9.90647	0	0	0	0	9.23	0	17.9566	0	0	0	0	40.9201	5	0	3.78935	0.866025	-5	0	0	0	0	0	0	0	0	0	0	-2.27616	1	0.781991	2	0	0	0	0	8.33333	2.21429	0	0	3
967	0	1.66667	0	0	0	0	5.08467	0	5	0	0	0	0	0	0	0	0	0	0	0	0	0	1	0	1.06066	3	0	0	0	0	0	0	0	0	0	0	-2.24487	0	0.277778	0	0	0	0	0	0	4.2	0	0	0
968	0	2.7859	0	0	0	0	6.80241	0	6.6268	0	0	0	0	0	0	0.689815	0	0	0	0	0	0	1	0.0833333	1.30671	2.5	0	0	0	0	0	0	0	0	0	0	-2.53929	0	0.397985	0	0	0	0	0	0	4.28571	0	0	0
970	37.314	17.0131	0	0	0	30.18	18.2316	1	40.006	0	0	1	0	30.18	1	22.8749	1	0	0	0	48.5312	5	2	6.30244	7.84096	2.25	0	0	0	0	0	0	1	0	0	0	-5.18686	0	0.739699	0	1	0	0	3	0	12.4545	0	0	3
975	0	13.4275	0	0	12.0245	32.67	11.2575	0	32.8345	0	0	1	0	32.67	2	16.9917	0	1	0	0	45.0548	4	2	5.02447	6.31473	2.75	0	0	0	0	0	0	1	0	0	0	-4.18353	1	0.671375	1	0	0	3	2	3.0303	10.0053	0	0	3
978	0	24.633	0	0	0	23.47	14.2632	0	36.2003	1	0	0	1	23.47	1	12.2791	0	0	0	0	45.8077	2	1	3.86526	6.54386	-5	0	0	0	0	0	9.86526	1	1	0	0	-4.45514	1	1.173	1	0	0	3	1	2.08333	10.8	0	1	2
980	0	22.5617	0	0	12.5163	23.55	14.1975	0	41.7669	1	0	1	1	23.55	1	13.7904	0	1	0	0	31.3936	3	2	5.51626	6.91439	-1.25	0	0	0	0	0	0	1	1	0	0	-4.37551	1	0.902468	1	0	0	1	2	1.88679	8.24	0	0	3
981	19.302	23.0742	0	0	0	41.93	4.70331	1	38.4133	3	0	0	0	41.93	1	21.0453	0	0	0	0	67.8074	4	1	4.55421	9.35335	-7	0	0	0	0	0	10.5542	1	0	0	0	-3.08377	3	1.04883	5	0	0	8	1	6.97674	15.5065	0	0	4
987	37.314	17.7599	0	0	0	43.07	24.7176	1	40.006	0	0	1	0	43.07	1	17.0829	0	0	0	0	50.1115	6	2	2.27395	8.51494	2.25	0	0	0	0	0	0	1	0	0	0	-5.44465	0	0.772171	0	2	0	0	4	0	12.4545	0	0	3
992	0	4.09272	0	0	0	0	9.84956	0	4.09272	0	0	0	0	0	0	0.847222	0	0	0	0	0	0	0	0.211806	0.353553	-2	0	0	0	0	0	0	0	0	0	0	-2.1348	0	0.818545	0	0	0	0	0	0	2	0	0	0
993	0	5.31294	0	0	0	0	12.3631	0	5.31294	0	0	0	0	0	0	0.927222	0	0	0	0	0	0	0	0.231806	0.5	-2.5	0	0	0	0	0	0	0	0	0	0	-2.40213	0	0.885491	0	0	0	0	0	0	2.33333	0	0	0
996	0	13.8655	0	0	11.9495	38.33	5.13573	0	25.1135	1	0	0	0	38.33	1	14.6452	0	0	1	0	54.1556	3	1	4.94947	4.62443	-2.75	0	0	0	0	0	0	1	0	0	0	-2.70161	2	0.815617	3	0	0	4	1	5.55556	6.13235	0	0	3
1000	0	5	0	0	0	0	9.76009	0	5	0	0	0	0	0	0	0	0	0	0	0	0	0	0	0	1.06066	-3	0	0	0	0	0	0	0	0	0	0	-2.45646	0	0.833333	0	0	0	0	0	0	4.2	0	0	0
1002	0	23.0094	0	0	0	12.47	27.0461	0	50.4049	0	0	1	1	12.47	1	9.30083	0	0	0	0	14.1242	2	3	2.37099	7.76181	3.75	0	0	0	0	0	0	1	1	0	0	-5.78427	1	0.821765	2	0	0	2	1	1.75439	8.04497	0	0	2
1007	0	14.612	0	0	0	29.26	11.6031	0	29.1436	0	0	1	0	29.26	0	7.22154	0	0	0	0	36.0215	2	2	1.69804	5.93048	1	0	0	0	0	0	0	1	0	0	0	-3.84891	0	0.769051	0	0	0	0	2	0	12.1462	0	0	2
[truncated: 117 more columns]

## Sheet: Sheet5_Ablation study-2
Name	RA function(LK)	MaxPos(LK)	MaxNeg(LK)	Abs MaxPos-MaxNeg	Avg.Sim(LK)	sm1(LK)[Banerjee-Roy similarity coefficient 1]	logBB
1	-1.87743	1.69613e-08	0.151802	0.151802	0.0156988	-1	-2.52			Developing q-RASAR models without fusing QSAR descriptors with RASAR descriptors.
2	-2.07185	0.000326707	0.950869	0.950542	0.0965582	-0.999656	-2.15
3	-2.13115	0.00031941	0.950869	0.95055	0.0965444	-0.999664	-2.09			R^2	0.600384
4	-0.715812	0.000296308	0.0153756	0.0150793	0.00213635	-0.980729	-1.88			Q^2	0.593407
5	-1.6932	3.93617e-09	0.31392	0.31392	0.0374656	-1	-1.82			LV	5
6	-1.69402	1.31659e-09	1	1	0.138542	-1	-1.82
7	-1.50774	0.000154493	0.00412639	0.0039719	0.000601888	-0.96256	-1.7
8	-0.682196	0.0141167	0.167201	0.153084	0.0779241	-0.91557	-1.67
11	-0.755921	0.116894	0.270986	0.154092	0.10051	-0.568634	-1.52
12	-0.248775	4.51723e-06	0.000434784	0.000430267	0.000135337	-0.98961	-1.52
13	-0.458005	1.13002e-06	1.15075e-06	2.07334e-08	4.56204e-07	-0.0180173	-1.48
14	-0.611532	0.00497126	0.0294235	0.0244522	0.00580399	-0.831044	-1.42
15	-0.827875	9.02773e-05	0.00207248	0.0019822	0.000433175	-0.95644	-1.4
16	-0.544213	0.00368536	0.00932081	0.00563545	0.00233746	-0.604609	-1.33
19	-1.22662	0.0231125	1	0.976888	0.106897	-0.976888	-1.3
20	-0.943442	0.00231885	0.157296	0.154977	0.0359588	-0.985258	-1.23
21	-1.20217	0.00308656	0.909695	0.906609	0.204834	-0.996607	-1.23
23	-1.04987	0.00565684	0.0364298	0.030773	0.0125071	-0.84472	-1.14
24	-1.08868	0.00135107	0.839813	0.838462	0.163377	-0.998391	-1.12
25	-0.927773	0.122376	1	0.877624	0.152212	-0.877624	-1.01
26	0.388225	1	0.00690173	0.993098	0.100725	0.993098	-1
27	-0.263883	0.014749	0.228941	0.214192	0.0409916	-0.935577	-1
29	-0.479324	0.0127012	0.117475	0.104774	0.0310034	-0.891882	-1
31	-0.747486	0.00256084	0.779802	0.777241	0.090836	-0.996716	-0.92
32	-0.712379	0.000170176	0.000317016	0.000146839	0.00017754	-0.463193	-0.89
33	-0.183026	0.0114299	0.677625	0.666195	0.128836	-0.983132	-0.89
34	-0.0193379	0.294828	0.471789	0.176961	0.327931	-0.375085	-0.85
35	-0.849756	0.00328396	0.779802	0.776518	0.0892995	-0.995789	-0.81
36	-0.474117	0.367822	1	0.632178	0.186028	-0.632178	-0.8
38	-0.331872	0.370969	0.343567	0.0274025	0.186207	0.0738673	-0.8
40	-0.34997	0.977955	1	0.0220448	0.295625	-0.0220448	-0.78
41	-0.34997	0.977955	1	0.0220448	0.295625	-0.0220448	-0.78
42	-0.340275	1	0.977955	0.0220448	0.295625	0.0220448	-0.78
44	-0.74433	0.00970067	0.867543	0.857843	0.0955989	-0.988818	-0.73
45	-0.589473	0.0105033	0.909458	0.898955	0.433271	-0.988451	-0.72
48	-0.699736	5.68446e-06	0.000177365	0.00017168	5.41154e-05	-0.96795	-0.7
49	-0.13545	0.182655	1	0.817345	0.222906	-0.817345	-0.7
50	-0.67598	0.0505884	0.616469	0.56588	0.244335	-0.917938	-0.69
52	0.108718	0.11994	0.122909	0.00296876	0.0982391	-0.0241542	-0.67
53	-0.670535	1.59677e-05	0.83485	0.834835	0.0836616	-0.999981	-0.67
54	-0.160383	0.132634	0.301749	0.169116	0.146588	-0.560451	-0.66
55	0.118938	0.123394	0.0446962	0.0786983	0.0268893	0.637778	-0.66
56	-0.529195	0.0198773	0.831898	0.812021	0.127068	-0.976106	-0.66
57	-0.639912	0.000362026	1	0.999638	0.100784	-0.999638	-0.64
58	-0.219479	0.268236	0.348298	0.0800626	0.0889175	-0.229868	-0.62
59	0.61173	0.124341	0.0371928	0.0871484	0.0425931	0.700881	-0.6
60	0.0896078	0.0720231	0.0200361	0.051987	0.0198155	0.721811	-0.59
61	-0.328866	0.0223907	0.70175	0.679359	0.110248	-0.968093	-0.59
63	0.150467	0.900534	0.312548	0.587986	0.308918	0.652931	-0.57
66	-0.351494	0.000109267	0.00164237	0.0015331	0.00053279	-0.93347	-0.52
67	-0.40568	0.164367	0.348298	0.183931	0.0805246	-0.528085	-0.52
68	0.404402	4.29775e-06	2.67616e-10	4.29748e-06	1.97779e-06	0.999938	-0.52
69	0.0560534	0.42169	0.341498	0.0801919	0.249113	0.190168	-0.51
70	-0.557835	0.0184234	1	0.981577	0.265648	-0.981577	-0.49
71	-0.557835	0.0184234	1	0.981577	0.265648	-0.981577	-0.49
72	-0.606977	0.000235377	0.00286604	0.00263066	0.000731673	-0.917874	-0.46
73	-0.744873	0.00382563	0.00583676	0.00201112	0.00372948	-0.344562	-0.4
74	-0.794601	0.000765805	0.00261492	0.00184912	0.00115203	-0.707141	-0.4
75	-0.379958	3.35667e-05	1	0.999966	0.10002	-0.999966	-0.38
76	-0.825465	0.0011547	0.107983	0.106828	0.026162	-0.989307	-0.37
77	-0.141605	0.0111886	0.0159568	0.00476825	0.00926838	-0.298822	-0.34
78	-0.221648	0.628306	1	0.371694	0.467963	-0.371694	-0.34
79	-0.0639998	0.326452	0.471491	0.145039	0.323108	-0.307619	-0.32
80	0.134123	0.0296854	0.00149523	0.0281902	0.00327787	0.949631	-0.3
81	-0.397744	4.21454e-08	0.0780333	0.0780333	0.00834381	-0.999999	-0.3
82	0.454753	0.00222049	0.000142398	0.00207809	0.000399501	0.935871	-0.3
83	-0.0713778	0.248451	0.566964	0.318513	0.275936	-0.561786	-0.29
84	0.000992179	0.799853	0.363521	0.436332	0.364166	0.545516	-0.29
86	-0.310102	0.0906922	0.711868	0.621176	0.135026	-0.8726	-0.28
88	-0.232135	0.0298219	0.908597	0.878775	0.0995572	-0.967178	-0.25
89	-0.0976878	0.16254	0.566022	0.403482	0.223992	-0.712838	-0.24
90	-0.086651	0.313066	1	0.686934	0.391726	-0.686934	-0.22
92	-0.555944	0.00471833	0.00451793	0.000200394	0.00267475	0.0424713	-0.22
93	-0.317173	0.191074	0.171588	0.0194861	0.100403	0.101982	-0.21
94	0.146317	0.0106327	0.00923239	0.00140029	0.00345196	0.131696	-0.2
96	-0.893183	0.0554326	0.511996	0.456564	0.176539	-0.891732	-0.18
97	-0.287115	0.118189	1	0.881811	0.351454	-0.881811	-0.18
98	-0.753609	0.0531573	0.466857	0.4137	0.168841	-0.886138	-0.17
99	-0.133903	0.838683	0.180487	0.658196	0.129782	0.784797	-0.17
100	-0.17548	0.014066	1	0.985934	0.107365	-0.985934	-0.17
104	-0.12861	0.174343	0.301749	0.127407	0.145974	-0.422227	-0.12
107	0.366963	0.299066	0.206321	0.0927443	0.125883	0.310114	-0.1
108	-0.176746	0.000369918	1	0.99963	0.112432	-0.99963	-0.09
109	-0.176746	0.000369918	1	0.99963	0.112432	-0.99963	-0.09
110	-0.359522	0.0268574	0.176477	0.14962	0.0383433	-0.847814	-0.08
111	-0.588528	0.012689	0.677625	0.664936	0.142021	-0.981274	-0.08
112	0.275754	0.508448	1	0.491552	0.30379	-0.491552	-0.07
113	0.240802	0.0440759	0.00486132	0.0392146	0.00997779	0.889706	-0.06
114	-0.126194	0.356814	0.566964	0.21015	0.3656	-0.370659	-0.06
115	0.104004	0.731009	0.532228	0.198782	0.377409	0.271928	-0.05
116	-0.711597	0.0124243	0.772829	0.760405	0.387051	-0.983924	-0.05
118	0.213962	0.0749108	0.00478713	0.0701237	0.0152132	0.936096	-0.01
119	0.0634647	0.322246	0.358083	0.0358377	0.10027	-0.100082	0
121	-0.909266	0.00668782	0.0341243	0.0274364	0.00512764	-0.804016	0
122	-0.0370206	0.0921565	0.0108045	0.081352	0.0162794	0.88276	0
124	0.0863323	0.0858896	0.079278	0.00661155	0.0382824	0.0769773	0
125	0.626664	0.0953766	0.00190916	0.0934674	0.0272672	0.979983	0.01
127	-0.376029	0.000168602	0.000591104	0.000422501	0.000253665	-0.714767	0.02
128	-0.132694	0.0680291	0.0576859	0.0103431	0.0463732	0.15204	0.03
129	-0.109574	0.0921565	0.0720231	0.0201334	0.0248322	0.21847	0.04
130	-0.508259	0.0168242	0.0861089	0.0692847	0.0310997	-0.804617	0.05
131	0.0793916	0.0142584	0.0440759	0.0298175	0.0131954	-0.676504	0.07
132	-0.226938	1.59541e-06	1	0.999998	0.115807	-0.999998	0.07
133	0.336582	1	6.99963e-06	0.999993	0.274425	0.999993	0.08
134	-0.286582	0.102314	0.0696332	0.0326807	0.0432929	0.319416	0.09
135	-0.150294	0.376815	0.406225	0.02941	0.298092	-0.0723982	0.11
137	0.0824021	1	0.435597	0.564403	0.621131	0.564403	0.12
138	0.214795	1	0.337847	0.662153	0.730117	0.662153	0.13
139	0.214795	1	0.337847	0.662153	0.730117	0.662153	0.13
140	-0.324641	0.0719935	0.838683	0.76669	0.124484	-0.914159	0.16
141	0.309705	0.412166	0.0117908	0.400375	0.0689729	0.971393	0.16
142	-0.0758433	0.230156	0.900534	0.670378	0.290344	-0.744422	0.17
143	0.355285	0.163003	0.061849	0.101154	0.0594943	0.620566	0.18
144	-0.300369	6.0623e-07	0.0296854	0.0296848	0.00297937	-0.99998	0.19
148	0.370533	0.281161	0.0109064	0.270254	0.0699505	0.961209	0.2
149	0.166081	1	0.396597	0.603403	0.147846	0.603403	0.23
150	-0.50109	0.00418171	0.123394	0.119213	0.0192609	-0.966111	0.23
151	0.667565	1	0.109744	0.890256	0.595786	0.890256	0.24
152	0.756287	0.561196	0.280067	0.281129	0.31485	0.500947	0.25
153	0.341563	1	0.919837	0.0801632	0.963783	0.0801632	0.27
155	0.318771	0.00239356	0.00305639	0.000662828	0.000806916	-0.216867	0.28
156	0.210212	0.679687	0.194988	0.484699	0.238247	0.713121	0.3
157	0.290553	1	0.00484368	0.995156	0.101808	0.995156	0.3
158	0.290553	1	0.00484368	0.995156	0.101808	0.995156	0.3
159	0.22727	0.412166	0.0184358	0.39373	0.0717402	0.955271	0.3
161	0.102613	0.0786439	0.000658434	0.0779855	0.00826555	0.991628	0.32
162	0.740481	0.471168	0.0206775	0.45049	0.0877742	0.956114	0.33
163	0.71275	0.447249	0.00591462	0.441335	0.111091	0.986776	0.34
164	-0.162365	0.0242528	0.0734876	0.0492348	0.0134234	-0.669974	0.35
165	0.337625	1	0.886617	0.113383	0.946005	0.113383	0.35
166	0.765005	0.550634	0.0394956	0.511138	0.11836	0.928273	0.38
167	0.891839	0.558408	0.0676296	0.490779	0.252744	0.878889	0.39
168	0.663814	1	0.109309	0.890691	0.397121	0.890691	0.39
171	-1.0017	3.54359e-06	1	0.999996	0.100725	-0.999996	0.4
174	0.192558	1	0.410405	0.589595	0.76143	0.589595	0.42
175	0.47099	0.589172	0.469376	0.119796	0.45486	0.203329	0.42
176	0.331228	0.769239	0.0301752	0.739063	0.0945021	0.960773	0.43
177	0.592662	0.494795	0.0501299	0.444665	0.0871792	0.898686	0.48
178	-0.00291431	0.51868	0.481531	0.0371491	0.339567	0.0716224	0.51
179	0.347316	0.0149633	0.0034525	0.0115108	0.00616475	0.769269	0.51
180	-0.780021	7.82257e-08	1	1	0.295625	-1	0.52
181	-0.549562	1.23264e-09	8.02208e-05	8.02196e-05	8.6805e-06	-0.999985	0.53
182	0.264028	1	0.66485	0.33515	0.498872	0.33515	0.55
183	0.264028	1	0.66485	0.33515	0.498872	0.33515	0.55
184	0.201809	1	0.284084	0.715916	0.160638	0.715916	0.56
185	0.201809	1	0.284084	0.715916	0.160638	0.715916	0.56
186	-0.0391291	0.58346	0.689916	0.106457	0.374753	-0.154304	0.56
187	0.0837139	0.168819	0.403121	0.234302	0.19294	-0.58122	0.56
188	0.542049	0.902433	0.0488052	0.853628	0.294956	0.945918	0.57
189	0.68191	1	0.00562746	0.994373	0.143775	0.994373	0.59
190	0.68191	1	0.00562746	0.994373	0.143775	0.994373	0.59
191	-0.200783	0.380115	0.834802	0.454687	0.393393	-0.544664	0.6
192	0.148292	0.00840461	0.00222049	0.00618412	0.00349178	0.735801	0.6
193	0.539639	1	0.00322397	0.996776	0.209839	0.996776	0.61
194	0.67211	0.969983	0.00716946	0.962814	0.166402	0.992609	0.68
195	-0.0266714	0.134431	0.139904	0.00547311	0.07426	-0.0391204	0.71
196	0.981436	0.987044	0.0226144	0.96443	0.22698	0.977089	0.73
200	0.831732	0.00282982	0.00054024	0.00228958	0.000626692	0.80909	0.75
201	-0.081135	0.31203	0.307388	0.00464218	0.170313	0.0148773	0.77
202	0.58945	0.266199	0.274807	0.00860727	0.235601	-0.0313212	0.77
204	0.750467	0.604512	0.13969	0.464823	0.416615	0.768922	0.81
205	0.854868	0.0348006	0.000457107	0.0343435	0.0115892	0.986865	0.83
206	0.766521	0.78969	0.147725	0.641965	0.591031	0.812932	0.83
207	-0.10221	0.58346	0.731009	0.14755	0.406695	-0.201844	0.88
208	0.54887	0.969983	0.0073673	0.962616	0.166857	0.992405	0.89
209	0.53011	0.792689	0.252266	0.540423	0.231421	0.681759	0.9
211	0.577177	0.550634	0.0450455	0.505588	0.127325	0.918193	0.9
212	0.170643	0.249745	0.236783	0.0129614	0.165245	0.0518985	0.9
213	0.896839	0.9019	0.020396	0.881504	0.214787	0.977386	0.92
214	0.626676	1	0.254216	0.745784	0.456533	0.745784	0.98
215	0.484644	0.355108	0.159521	0.195587	0.149998	0.550782	1
216	0.862712	0.333963	0.00132961	0.332634	0.0509348	0.996019	1.04
217	0.339803	0.494795	0.0318492	0.462945	0.0755117	0.935631	1.04
219	0.472807	0.792689	0.239311	0.553378	0.233322	0.698102	1.08
221	0.69542	1	0.0104512	0.989549	0.321132	0.989549	1.11
222	0.849193	1	0.0576509	0.942349	0.246579	0.942349	1.11
224	0.754137	0.987044	0.0228129	0.964232	0.225974	0.976888	1.25
225	0.480353	0.336378	0.076342	0.260036	0.054857	0.773047	1.32
227	0.807282	1.69914e-05	3.87182e-06	1.31196e-05	3.56712e-06	0.772131	1.48
228	0.804576	0.648507	0.0292939	0.619214	0.252645	0.954829	1.53
229	-0.577707	1.15386e-07	2.56567e-07	1.41181e-07	7.6216e-08	-0.550271	-2.15
230	-0.644884	0.00881335	0.0283	0.0194866	0.0050277	-0.688574	-2.09
231	-1.33816	0.000215794	0.00412639	0.0039106	0.000610619	-0.947704	-2
233	-0.999622	0.000114604	0.0145554	0.0144408	0.00235425	-0.992126	-1.96
234	-1.77513	2.32407e-06	0.00347514	0.00347282	0.000407902	-0.999331	-1.9
235	-2.51033	2.76853e-08	0.151802	0.151802	0.0153265	-1	-1.89
237	-1.69402	1.31659e-09	1	1	0.138542	-1	-1.82
239	-1.73645	2.05678e-09	0.31392	0.31392	0.036039	-1	-1.82
240	-0.407261	0.0110913	0.0109465	0.000144827	0.00576248	0.0130577	-1.72
241	-0.834086	0.00424471	0.00991305	0.00566834	0.00316201	-0.571806	-1.7
242	-0.468769	0.102547	0.511996	0.40945	0.141182	-0.799712	-1.68
243	-0.12604	0.0682715	0.171588	0.103317	0.0473353	-0.60212	-1.6
244	-1.12525	9.71844e-05	0.00318998	0.0030928	0.000814778	-0.969535	-1.57
245	0.0545144	0.606208	0.00607316	0.600135	0.0616358	0.989982	-1.52
246	-0.202063	0.0106225	0.185049	0.174426	0.022035	-0.942596	-1.52
247	-1.50288	1.22668e-06	1	0.999999	0.100337	-0.999999	-1.52
248	-1.52281	1.22668e-06	1	0.999999	0.100337	-0.999999	-1.5
249	-0.952922	0.0325237	1	0.967476	0.312759	-0.967476	-1.5
250	-0.682492	0.0403024	0.768505	0.728202	0.204825	-0.947557	-1.42
251	-0.889983	0.00132663	0.00127758	4.90538e-05	0.000956094	0.0369762	-1.4
252	-1.38761	0.000402995	1	0.999597	0.101507	-0.999597	-1.4
253	-1.38761	0.000402995	1	0.999597	0.101507	-0.999597	-1.4
255	-0.121893	0.000443495	0.00182269	0.0013792	0.000468271	-0.756682	-1.4
258	-1.81786	2.98433e-09	0.361945	0.361945	0.0739911	-1	-1.34
259	-1.0848	0.000130599	0.443776	0.443645	0.0754342	-0.999706	-1.3
260	-1.23614	0.00115802	0.748964	0.747806	0.0818516	-0.998454	-1.3
261	0.0206055	0.00252731	0.00245273	7.45797e-05	0.0017461	0.0295095	-1.3
262	0.0450891	0.00485869	0.0397243	0.0348656	0.00521336	-0.87769	-1.3
263	-0.58923	0.0928651	0.21406	0.121195	0.100465	-0.566172	-1.3
266	-1.27028	0.00121453	0.748964	0.74775	0.0825521	-0.998378	-1.26
270	-1.14335	1.22597e-05	0.0146514	0.0146391	0.00454464	-0.999163	-1.23
271	-1.19928	0.00326292	0.909695	0.906432	0.214769	-0.996413	-1.23
272	-1.20219	0.00294318	0.812426	0.809482	0.193324	-0.996377	-1.23
274	-0.30315	0.00690173	0.00690173	0	0.00138597	0	-1.23
275	-0.653336	0.000532417	0.0218282	0.0212958	0.00565467	-0.975609	-1.22
276	-1.00634	0.0425559	0.58033	0.537774	0.234271	-0.92667	-1.22
277	-0.96775	0.00934462	0.0294235	0.0200788	0.00478271	-0.682409	-1.15
278	-0.386597	0.00124315	0.180779	0.179536	0.0215647	-0.993123	-1.15
280	-0.640326	0.00106092	0.415631	0.41457	0.0870186	-0.997447	-1.12
281	-0.801564	0.115356	0.270986	0.15563	0.104688	-0.574309	-1.11
282	-1.08512	5.16214e-09	1	1	0.103005	-1	-1.1
283	-1.08512	5.16214e-09	1	1	0.103005	-1	-1.1
285	-1.17198	9.95357e-05	0.513377	0.513278	0.0972671	-0.999806	-1.1
286	0.353712	5.6631e-05	1.2654e-05	4.3977e-05	1.29729e-05	0.776553	-1.08
287	-1.17521	6.06296e-05	0.513377	0.513317	0.0830666	-0.999882	-1.06
288	-0.908064	0.122376	1	0.877624	0.152212	-0.877624	-1.04
289	-0.891465	0.0790304	1	0.92097	0.115806	-0.92097	-1.03
290	-0.750329	0.0437982	0.491865	0.448067	0.114131	-0.910955	-1
291	-1.1231	0.000765591	0.0226769	0.0219113	0.0106799	-0.966239	-1
292	-0.270067	0.0345179	0.131682	0.0971645	0.0417913	-0.73787	-1
293	-0.77419	0.0359234	0.281588	0.245665	0.140185	-0.872426	-1
294	0.302894	0.344629	0.0160848	0.328544	0.0425685	0.953327	-1
295	-0.0836185	0.249437	0.172271	0.0771657	0.0983623	0.30936	-1
296	0.0691827	0.0596002	0.135489	0.0758891	0.0660001	-0.560111	-1
298	-0.0851562	0.158451	0.0873453	0.071106	0.0567484	0.448756	-1
300	-0.419228	0.000326413	0.022594	0.0222675	0.00434885	-0.985553	-1
301	-0.74743	0.053335	0.627747	0.574412	0.142343	-0.915037	-1
302	0.0545902	0.00847078	0.00304313	0.00542765	0.00308025	0.640749	-1
303	0.235493	0.0142661	0.008284	0.0059821	0.00628998	0.419323	-0.95
304	-0.349801	0.000792277	0.0389558	0.0381635	0.0167343	-0.979662	-0.93
305	-0.711256	0.000883652	0.0151551	0.0142714	0.00320281	-0.941693	-0.92
306	-0.830916	0.0341243	0.0283	0.0058243	0.00774356	0.170679	-0.9
307	-0.0820175	0.149191	0.114772	0.0344188	0.08164	0.230703	-0.9
308	-0.116251	0.124873	0.771507	0.646634	0.308164	-0.838144	-0.9
311	-0.465324	4.96119e-06	7.10514e-06	2.14395e-06	4.90108e-06	-0.301747	-0.85
312	-0.617237	0.145251	0.21406	0.0688087	0.116752	-0.321446	-0.85
313	0.343461	0.358083	3.91267e-05	0.358044	0.0926297	0.999891	-0.83
315	-0.388043	0.000110769	0.00142575	0.00131498	0.000178878	-0.922308	-0.82
316	-1.40421	0.000171325	0.0100645	0.00989322	0.00110243	-0.982977	-0.8
318	0.219532	0.0040708	0.000276998	0.0037938	0.000913243	0.931955	-0.8
320	-0.75062	0.0362485	1	0.963751	0.10596	-0.963751	-0.8
322	-0.979018	0.0178525	1	0.982147	0.291078	-0.982147	-0.79
323	-0.479492	0.367822	1	0.632178	0.186028	-0.632178	-0.79
325	-0.979018	0.0178525	1	0.982147	0.291078	-0.982147	-0.79
326	0.495021	0.0484603	0.0114232	0.0370371	0.013091	0.764276	-0.78
327	-0.778933	0.0362485	1	0.963751	0.10596	-0.963751	-0.77
328	-0.236554	0.000820127	0.583276	0.582456	0.0664654	-0.998594	-0.76
330	-1.0844	0.000645858	0.206513	0.205868	0.0575591	-0.996873	-0.73
331	-0.813781	0.000665952	0.213237	0.212571	0.0468278	-0.996877	-0.73
332	-0.744089	0.00978165	0.867543	0.857762	0.0954264	-0.988725	-0.73
334	-0.59607	0.00971196	0.94415	0.934438	0.436033	-0.989714	-0.72
337	0.117672	1	0.69054	0.30946	0.450904	0.30946	-0.7
339	0.12119	0.570815	0.319717	0.251098	0.274266	0.439894	-0.7
340	-0.141425	0.0896165	0.0443704	0.0452461	0.0171666	0.504886	-0.7
341	-0.635984	4.93354e-05	0.00743394	0.00738461	0.00157616	-0.993363	-0.7
342	-0.880209	0.0493968	0.627747	0.57835	0.137155	-0.921311	-0.7
343	0.259628	0.655419	0.236539	0.41888	0.232468	0.639103	-0.69
344	-0.22464	0.729623	0.536537	0.193085	0.269589	0.264637	-0.67
345	-0.122309	0.0603574	0.035337	0.0250204	0.00972886	0.414538	-0.67
346	-0.816825	0.000165058	0.00581092	0.00564587	0.00344962	-0.971595	-0.67
348	-0.670508	1.50451e-05	0.83485	0.834835	0.0836715	-0.999982	-0.67
350	-0.531724	0.00982755	0.0552385	0.0454109	0.0156102	-0.822089	-0.66
351	-0.521646	0.0188567	0.831898	0.813042	0.130133	-0.977333	-0.66
353	0.115761	0.923023	0.479959	0.443064	0.498296	0.480014	-0.65
354	-0.639912	0.000362026	1	0.999638	0.100784	-0.999638	-0.64
355	0.680117	0.254216	0.0657984	0.188417	0.182497	0.741171	-0.64
357	-0.345401	0.000125537	0.00583703	0.00571149	0.0013499	-0.978493	-0.63
358	-0.512161	0.0904665	1	0.909533	0.134163	-0.909533	-0.62
359	-0.512161	0.0904665	1	0.909533	0.134163	-0.909533	-0.62
360	-0.676984	0.0342183	0.722477	0.688259	0.295301	-0.952638	-0.6
361	0.0158981	0.863448	0.520876	0.342572	0.414603	0.396749	-0.6
362	0.0491865	0.033417	0.00330076	0.0301162	0.00903146	0.901225	-0.6
364	-1.09953	1.47159e-07	0.0300466	0.0300465	0.00601484	-0.999995	-0.59
365	-0.341488	0.044569	0.0653452	0.0207762	0.0440384	-0.317946	-0.59
366	0.529461	8.02208e-05	1.49957e-08	8.02058e-05	8.02687e-06	0.999813	-0.57
367	-0.559593	0.0019345	1	0.998066	0.111072	-0.998066	-0.56
368	-0.559593	0.0019345	1	0.998066	0.111072	-0.998066	-0.56
370	-0.220899	0.690424	0.821046	0.130622	0.160217	-0.159093	-0.55
371	-0.71436	0.0101948	0.03151	0.0213151	0.0223182	-0.676457	-0.55
372	-0.188134	0.0700882	0.65449	0.584401	0.0786171	-0.892912	-0.54
373	-0.0192928	0.145497	0.15721	0.011713	0.122229	-0.0745056	-0.54
374	0.152968	0.711146	0.532228	0.178918	0.401726	0.251592	-0.52
375	0.0903152	0.0608478	0.0431645	0.0176833	0.0519465	0.290615	-0.52
376	-0.0160534	0.0620551	0.033412	0.0286431	0.0208221	0.461575	-0.52
377	-1.51092	0.00210162	0.0153756	0.013274	0.00191646	-0.863314	-0.52
379	-0.844224	0.0396928	0.0808963	0.0412035	0.0537461	-0.509337	-0.52
382	-0.0831938	0.251027	0.0443704	0.206657	0.0648801	0.823244	-0.5
384	-0.557835	0.0184234	1	0.981577	0.265648	-0.981577	-0.49
385	-0.715473	0.0442423	0.722477	0.678235	0.265519	-0.938763	-0.48
386	0.0274769	0.0446058	0.00142575	0.0431801	0.013694	0.968037	-0.48
387	-0.0503359	0.406225	0.30661	0.0996145	0.245803	0.24522	-0.47
390	-0.497724	0.0641793	0.492994	0.428814	0.105383	-0.869817	-0.46
392	-0.355278	0.0501299	1	0.94987	0.136801	-0.94987	-0.45
393	-0.355278	0.0501299	1	0.94987	0.136801	-0.94987	-0.45
394	-0.608509	0.0114071	0.0171883	0.00578126	0.00568496	-0.336348	-0.44
[truncated: 707 more rows]

## Sheet: Sheet6_Ablation study-3
ID	RA function(ED)	sm1(ED)[Banerjee-Roy similarity coefficient 1]	TPSA(NO)	Eta_C	B09[C-O]	B05[C-N]	logBB								ID	RA function(GK)	SD Activity(GK)	sm1(GK)[Banerjee-Roy similarity coefficient 1]	sm2(GK)[Banerjee-Roy similarity coefficient 2]	TPSA(NO)	Eta_C	logBB
[truncated: 1,013 more rows]
